# Supplementary material for: Transition metal-promoted switchable cascade processes: diverse synthesis of N-containing compounds through a remote trifluoromethylazidation/1,n-acyl migration sequence
Source: Royal Society of Chemistry journal article supplement (doi:10.1039/d4qo00934g), 2024-01-01

## Supporting Information

# Transition Metal-Promoted Switchable Cascade Processes: Diverse Synthesis of *N*-Containing Compounds through a Remote Trifluoromethylazidation/1, *n*-Acyl Migration Sequence

Ji-Ming Xi,<sup>a</sup> Yan-Xin Zhang,<sup>a</sup> Zhong-Lin Wei,<sup>a</sup> Wei-Wei Liao<sup>a, b\*</sup>

<sup>a</sup> Department of Organic Chemistry, College of Chemistry, Jilin University, 2699 Qianjin Street, Changchun 130012, P R China.

<sup>b</sup> State Key Laboratory of Organometallic Chemistry, Shanghai Institute of Organic Chemistry, Chinese Academy of Sciences, Shanghai 200032, P R China

E-mail: [wlliao@jlu.edu.cn](mailto:wlliao@jlu.edu.cn)

### Table of Contents

|                                                                |       |
|----------------------------------------------------------------|-------|
| I. General Information.....                                    | SI-2  |
| II. Reaction Conditions Screening .....                        | SI-3  |
| III. Preparation of Substrates.....                            | SI-4  |
| IV. General Procedure and Experimental Details.....            | SI-7  |
| V. Scale-up Reaction and Synthetic Transformations.....        | SI-24 |
| VI. Control Experiments.....                                   | SI-32 |
| VII. References.....                                           | SI-35 |
| VIII. Crystal Data and Structure Refinement for Compounds..... | SI-36 |
| IX. NMR Spectral Copies.....                                   | SI-59 |

## I. General Information

All reactions were carried out under inert atmospheric condition unless otherwise noted, and solvents were dried according to established procedures. Reactions were monitored by thin layer chromatography (TLC) visualizing with ultraviolet light (UV),  $\text{KMnO}_4$ , *p*-anisaldehyde stain, and phosphomolybdic acid (PMA) stain; column chromatography purifications were carried out using silica gel. For reactions that require heating, heating mantle was used. Proton nuclear magnetic resonance ( $^1\text{H}$  NMR) spectra were recorded on a 300, 400 or 500 MHz spectrometer in  $\text{CDCl}_3$  or DMSO, fluorine nuclear magnetic resonance ( $^{19}\text{F}$  NMR) spectra were recorded on a 376 or 470 MHz spectrometer in  $\text{CDCl}_3$  or DMSO, and carbon nuclear magnetic resonance ( $^{13}\text{C}$  NMR) spectra were recorded on 125 or 100 MHz spectrometer in  $\text{CDCl}_3$  or DMSO unless otherwise noted. Chemical shifts for protons are reported in parts per million downfield from tetramethylsilane (TMS) and are referenced to residual protium in the NMR solvent ( $\text{CHCl}_3 = \delta$  7.26 ppm, DMSO =  $\delta$  2.50 ppm). Chemical shifts for carbon are reported in parts per million downfield from tetramethylsilane (TMS) and are referenced to the carbon resonances of the solvent residual peak ( $\text{CDCl}_3 = \delta$  77.16 ppm, DMSO =  $\delta$  39.52 ppm). NMR data are presented as follows: chemical shift ( $\delta$  ppm), multiplicity (s = singlet, d = doublet, t = triplet, q = quartet, m = multiplet, br = broad), coupling constant in Hertz (Hz), integration. Mass spectra were recorded on the Bruker MicrOTOF Q II.

## II. Reaction Conditions Screening

**Table S1. Selected optimization of reaction conditions <sup>a</sup>**

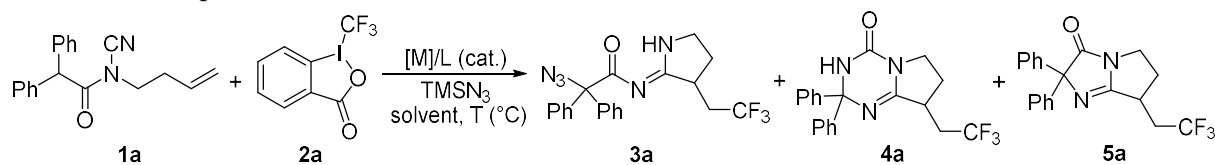

| Entry           | [M]                                                | L           | Solvent         | T (°C) | Yield of <b>3a</b><br>(%) <sup>b</sup> | Yield of <b>4a</b><br>(%) <sup>b</sup> | Yield of <b>5a</b><br>(%) <sup>b</sup> |
|-----------------|----------------------------------------------------|-------------|-----------------|--------|----------------------------------------|----------------------------------------|----------------------------------------|
| 1               | NiCl <sub>2</sub> ·DME                             | L1          | EtOAc           | 60     | 56                                     | 13                                     | nd                                     |
| 2               | NiBr <sub>2</sub> ·DME                             | L1          | EtOAc           | 60     | 43                                     | 15                                     | nd                                     |
| 3               | NiCl <sub>2</sub> (PPh <sub>3</sub> ) <sub>2</sub> | L1          | EtOAc           | 60     | 48                                     | 10                                     | nd                                     |
| 4               | NiCl <sub>2</sub> (dppe)                           | L1          | EtOAc           | 60     | 40                                     | 7                                      | nd                                     |
| 5               | Ni(OTf) <sub>2</sub>                               | L1          | EtOAc           | 60     | 15                                     | 36                                     | nd                                     |
| 6               | Ni(COD) <sub>2</sub>                               | L1          | EtOAc           | 60     | 42                                     | trace                                  | nd                                     |
| 7               | NiCl <sub>2</sub> ·DME                             | -           | EtOAc           | 60     | 12                                     | 29                                     | nd                                     |
| 8               | NiCl <sub>2</sub> ·DME                             | L2/L3/L4    | EtOAc           | 60     | 44/32/45                               | 18/21/19                               | nd                                     |
| 9               | NiCl <sub>2</sub> ·DME                             | L5/L6/L7/L8 | EtOAc           | 60     | 29/44/45/33                            | 18/17/19/12                            | nd                                     |
| 10              | NiCl <sub>2</sub> ·DME                             | L1          | EtOAc           | 50     | 59                                     | nd                                     | nd                                     |
| 11 <sup>c</sup> | NiCl <sub>2</sub> ·DME                             | L1          | EtOAc           | 50     | 53                                     | 5                                      | nd                                     |
| 12              | NiCl <sub>2</sub> ·DME                             | -           | EtOAc           | 80     | nd                                     | 54                                     | nd                                     |
| 13              | NiCl <sub>2</sub> ·DME                             | L1          | DCM/THF/Acetone | 50     | 24/nd/16                               | 14/nd/5                                | nd                                     |
| 14              | NiCl <sub>2</sub> ·DME                             | -           | DCM/THF/Acetone | 80     | nd/nd/nd                               | 52/nd/52                               | nd                                     |
| 15 <sup>d</sup> | NiCl <sub>2</sub> ·DME                             | L1/-        | EtOAc           | 50/80  | 63 (62)/nd                             | nd/62 (63)                             | nd                                     |
| 16              | CuCl                                               | L1/-        | EtOAc           | 50/80  | 31/trace                               | 13/33                                  | 19/22                                  |
| 17              | Cu(OAc) <sub>2</sub>                               | L1/-        | EtOAc           | 50/80  | 21/nd                                  | 27/27                                  | 23/43                                  |
| 18              | FeCl <sub>2</sub>                                  | L1/-        | EtOAc           | 50/80  | 25/nd                                  | nd/nd                                  | 25/34                                  |
| 19              | Fe(acac) <sub>3</sub>                              | L1/-        | EtOAc           | 50/80  | 52/nd                                  | nd/nd                                  | nd/33                                  |
| 20              | -                                                  | -           | EtOAc           | 50/80  | nd/nd                                  | nd/nd                                  | nd/nd                                  |

<sup>a</sup> Reaction conditions: **1a** (0.2 mmol), **2a** (Togni II, 0.24 mmol), catalyst (10 mol %), ligand (10 mol %), and TMSN<sub>3</sub> (0.6 mmol) in solvent (2 mL), 12 h, N<sub>2</sub>. <sup>b</sup> <sup>1</sup>H NMR yield using mesitylene as the internal standard. Isolated yield in parentheses. <sup>c</sup> Togni I (**2b**). <sup>d</sup> **2a** (0.3 mmol).

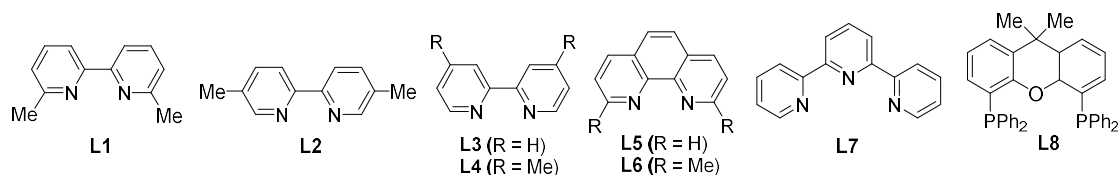

**Table S2. Optimized reaction conditions for preparation product 6a <sup>a</sup>**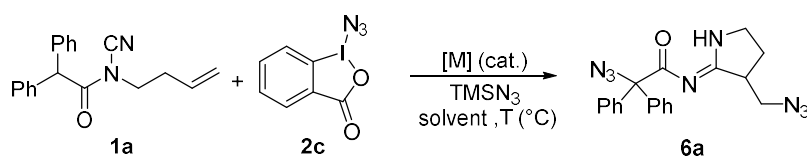

| Entry | Cat.                                  | solvent | T (°C) | t (h) | L  | Conv of <b>1a</b><br>(%) | Yield of <b>6a</b><br>(%) |
|-------|---------------------------------------|---------|--------|-------|----|--------------------------|---------------------------|
| 1     | NiCl <sub>2</sub> ·DME                | EtOAc   | 50     | 12    | L1 | 67                       | nd                        |
| 2     | NiCl <sub>2</sub> ·DME                | EtOAc   | 30     | 12    | L1 | 64                       | 26                        |
| 3     | Cu(MeCN) <sub>4</sub> PF <sub>6</sub> | EtOAc   | 30     | 12    | L1 | 79                       | 13                        |
| 4     | Cu(MeCN) <sub>4</sub> PF <sub>6</sub> | EtOAc   | 30     | 12    | L2 | 81                       | 26                        |
| 5     | Cu(MeCN) <sub>4</sub> PF <sub>6</sub> | EtOAc   | 30     | 12    | L3 | 82                       | 31                        |
| 6     | Cu(OAc) <sub>2</sub>                  | EtOAc   | 30     | 12    | L3 | 61                       | 24                        |
| 7     | Cu(MeCN) <sub>4</sub> PF <sub>6</sub> | DCM     | 30     | 12    | L3 | 79                       | 34                        |
| 8     | Cu(MeCN) <sub>4</sub> PF <sub>6</sub> | DCE     | 30     | 12    | L3 | 79                       | 35                        |
| 9     | Cu(MeCN) <sub>4</sub> PF <sub>6</sub> | THF     | 30     | 12    | L3 | 9                        | nd                        |
| 10    | Cu(MeCN) <sub>4</sub> PF <sub>6</sub> | MeCN    | 30     | 12    | L3 | 88                       | 30                        |
| 11    | Cu(MeCN) <sub>4</sub> PF <sub>6</sub> | DCE     | 30     | 6     | L3 | 79                       | 41                        |
| 12    | Cu(MeCN) <sub>4</sub> PF <sub>6</sub> | DCE     | 30     | 1     | L3 | 72                       | 49                        |

<sup>a</sup> Reaction conditions: **1a** (0.2 mmol), **2c** (0.3 mmol), catalyst (10 mol %) and TMSN<sub>3</sub> (0.6 mmol) in solvent (2 mL), 12 h, N<sub>2</sub>. Isolated yield.

### III. Preparation of Substrates

Substrates were prepared according to the known literature,<sup>1</sup> and NMR spectra data of substrates **1a**, **1e-1q**, **1s-1w** were in accordance with the reported data.<sup>1</sup>

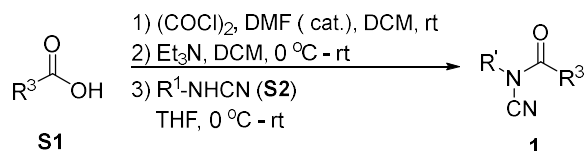

To a suspension of acid **S1** (1.2 mmol, 1.2 equiv.) in DCM (1 ml, 1.2 M) was added DMF (2 drops), followed by dropwise addition of (COCl)<sub>2</sub> (1.2 mmol, 1.2 equiv.) under nitrogen atmosphere at 0 °C. The mixture was stirred for 1 hour, whereupon gas evolution ceased and all acid dissolved. The reaction flask was cooled to -12 °C and a solution of Et<sub>3</sub>N (2.4 equiv.) in DCM (3.0 M) was dropwise added. Thereafter, a solution of cyanamide **S2** (1.0 mmol, 1 equiv.) in CH<sub>2</sub>Cl<sub>2</sub>/THF (3/1, 0.8 ml, 1.2 M) was slowly added at the same temperature. The resulting mixture was allowed to warm up to room temperature and stirred for 20–24 h. Upon completion, the reaction mixture was quenched with H<sub>2</sub>O and the aqueous phase was extracted with DCM. The combined organic phases were washed with brine, dried over Na<sub>2</sub>SO<sub>4</sub>, filtered, and concentrated in vacuo. The residue was purified by flash chromatography (silica gel, EtOAc/Petroleum ether (60-90 °C)) to give the desired substrates.

#### Spectral data for *N*-(but-3-en-1-yl)-*N*-cyano-2,2-di-*p*-tolylacetamide (**1b**)

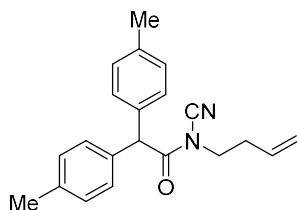



Purified by column chromatography (silica gel, EtOAc/Petroleum ether: 1/20) to afford the title compound (95% yield, 302 mg) as colorless oil.  $^1\text{H}$  NMR (400 MHz,  $\text{CDCl}_3$ )  $\delta$  7.20 – 7.10 (m, 8H),  $\delta$  5.68 (ddt,  $J = 17.1, 10.2, 6.9$  Hz, 1H), 5.51 (s, 1H), 5.12 – 5.03 (m, 2H), 3.67 (t,  $J = 6.9$  Hz, 2H), 2.44 – 2.37 (m, 2H), 2.32 (s, 6H).  $^{13}\text{C}\{^1\text{H}\}$  NMR (100 MHz,  $\text{CDCl}_3$ )  $\delta$  171.9, 137.7, 134.2, 132.8, 129.6, 128.7, 119.0, 110.6, 55.4, 46.1, 32.0, 21.2. HRMS (ESI)  $m/z$ :  $[\text{M}+\text{H}]^+$  calcd for  $\text{C}_{21}\text{H}_{23}\text{N}_2\text{O}$  319.1805; found: 319.1793.

#### Spectral data for 2,2-bis(4-bromophenyl)-*N*-(but-3-en-1-yl)-*N*-cyanoacetamide (1c)

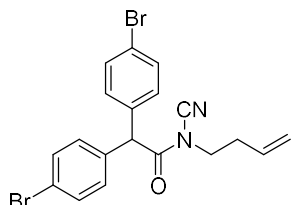

Purified by column chromatography (silica gel, EtOAc/Petroleum ether: 1/20) to afford the title compound (72% yield, 323 mg) as yellowish solid, mp: 73-75 °C.  $^1\text{H}$  NMR (400 MHz,  $\text{CDCl}_3$ )  $\delta$  7.51 – 7.45 (m, 4H), 7.17 – 7.11 (m, 4H), 5.67 (ddt,  $J = 17.1, 10.2, 6.9$  Hz, 1H), 5.49 (s, 1H), 5.12 – 5.02 (m, 2H), 3.69 (t,  $J = 6.9$  Hz, 2H), 2.49 – 2.29 (m, 2H).  $^{13}\text{C}\{^1\text{H}\}$  NMR (100 MHz,  $\text{CDCl}_3$ )  $\delta$  170.8, 135.4, 132.6, 132.3, 130.5, 122.5, 119.2, 110.2, 54.8, 46.2, 32.0. HRMS (ESI)  $m/z$ :  $[\text{M}+\text{H}]^+$  calcd for  $\text{C}_{19}\text{H}_{17}\text{Br}_2\text{N}_2\text{O}$  446.9702; found: 446.9689.

#### Spectral data for *N*-(but-3-en-1-yl)-*N*-cyano-3-phenyl-2-(*p*-tolyl)propenamide (1d)

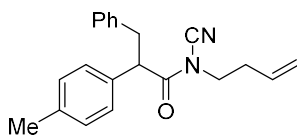

Purified by column chromatography (silica gel, EtOAc/Petroleum ether: 1/100) to afford the title compound (72% yield, 229 mg) as white solid, mp: 65-67 °C.  $^1\text{H}$  NMR (400 MHz,  $\text{CDCl}_3$ )  $\delta$  7.29 – 7.19 (m, 5H), 7.18 – 7.09 (m, 4H), 5.50 (ddt,  $J = 17.2, 10.4, 6.9$  Hz, 1H), 4.97 – 4.79 (m, 2H), 4.40 (dd,  $J = 9.2, 5.9$  Hz, 1H), 3.61 – 3.37 (m, 3H), 3.01 (dd,  $J = 13.7, 5.9$  Hz, 1H), 2.33 (s, 3H), 2.26 – 2.17 (m, 2H).  $^{13}\text{C}\{^1\text{H}\}$  NMR (100 MHz,  $\text{CDCl}_3$ )  $\delta$  172.4, 138.4, 138.0, 133.8, 132.6, 129.8, 129.2, 128.6, 128.2, 126.8, 118.8, 110.5, 52.5, 45.8, 40.3, 31.9, 21.2. HRMS (ESI)  $m/z$ :  $[\text{M}+\text{H}]^+$  calcd for  $\text{C}_{21}\text{H}_{23}\text{N}_2\text{O}$  319.1805; found: 319.1814.

#### Spectral data for *N*-cyano-*N*-(2,2-dimethylbut-3-en-1-yl)-2,2-diphenylacetamide (1r)

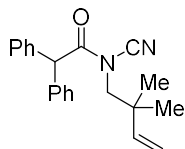

Purified by column chromatography (silica gel, EtOAc/Petroleum ether: 1/30) to afford the title compound (89% yield, 283 mg) as colorless oil.  $^1\text{H}$  NMR (400 MHz,  $\text{CDCl}_3$ )  $\delta$  7.36 – 7.28 (m, 10H), 5.76 (dd,  $J = 17.4, 10.7$  Hz, 1H), 5.66 (s, 1H), 5.05 – 4.92 (m, 2H), 3.53 (s, 2H), 1.04 (s, 6H).  $^{13}\text{C}\{^1\text{H}\}$  NMR (100 MHz,  $\text{CDCl}_3$ )  $\delta$  171.9, 143.8, 137.0, 129.0, 128.9, 128.0, 114.1, 111.8, 56.2, 55.8, 39.6, 24.7. HRMS (ESI)  $m/z$ :  $[\text{M}+\text{H}]^+$  calcd for  $\text{C}_{21}\text{H}_{23}\text{N}_2\text{O}$  319.1805; found: 319.1789.

#### Spectral data for *N*-cyano-*N*-(3-methylbut-3-en-1-yl) isobutyramide (1x)

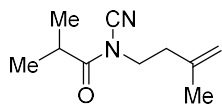

Purified by column chromatography (silica gel, EtOAc/Petroleum ether: 1/30) to afford the title compound (89% yield, 160 mg) as colorless oil.  $^1\text{H}$  NMR (400 MHz,  $\text{CDCl}_3$ )  $\delta$  4.86 (t,  $J = 1.7$  Hz, 1H), 4.80 – 4.77 (m, 1H), 3.71 (t,  $J = 7.0$  Hz, 2H), 3.13 (hept,  $J = 6.8$  Hz, 1H), 2.38 (t,  $J = 7.0$  Hz, 2H), 1.77 (s, 3H), 1.22 (d,  $J = 6.8$  Hz, 6H).  $^{13}\text{C}\{^1\text{H}\}$  NMR (125 MHz,  $\text{CDCl}_3$ )  $\delta$  176.5, 140.6, 113.9, 110.7, 44.2, 35.8, 33.6, 22.0, 19.1. HRMS (ESI)  $m/z$ :  $[\text{M}+\text{H}]^+$  calcd for  $\text{C}_{10}\text{H}_{17}\text{N}_2\text{O}$  181.1335; found: 181.1333.

**Spectral data for *N*-cyano-*N*-(3-methylbut-3-en-1-yl)cyclobutanecarboxamide (1y)**

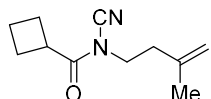

Purified by column chromatography (silica gel, EtOAc/Petroleum ether: 1/30) to afford the title compound (78% yield, 150 mg) as colorless oil.  $^1\text{H}$  NMR (500 MHz,  $\text{CDCl}_3$ )  $\delta$  4.86 (t,  $J = 1.6$  Hz, 1H), 4.80 – 4.76 (m, 1H), 3.69 (t,  $J = 7.1$  Hz, 2H), 3.64 – 3.56 (m, 1H), 2.41 – 2.28 (m, 6H), 2.11 – 1.99 (m, 1H), 1.97 – 1.87 (m, 1H), 1.77 (s, 3H).  $^{13}\text{C}\{^1\text{H}\}$  NMR (125 MHz,  $\text{CDCl}_3$ )  $\delta$  174.2, 140.6, 113.8, 110.5, 44.0, 38.4, 35.8, 25.1, 22.1, 18.1. HRMS (ESI)  $m/z$ :  $[\text{M}+\text{H}]^+$  calcd for  $\text{C}_{11}\text{H}_{17}\text{N}_2\text{O}$  193.1335; found: 193.1342.

**Spectral data for *N*-cyano-*N*-(3-methylbut-3-en-1-yl)tetrahydro-2H-pyran-4-carboxamide (1z)**

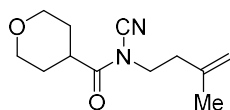

Purified by column chromatography (silica gel, EtOAc/Petroleum ether: 1/20) to afford the title compound (87% yield, 193 mg) as colorless oil.  $^1\text{H}$  NMR (500 MHz,  $\text{CDCl}_3$ )  $\delta$  4.86 (t,  $J = 1.7$  Hz, 1H), 4.78 (s, 1H), 4.05 – 3.97 (m, 2H), 3.72 (t,  $J = 6.9$  Hz, 2H), 3.52 – 3.43 (m, 2H), 3.15 – 3.04 (m, 1H), 2.38 (t,  $J = 7.0$  Hz, 2H), 1.90 – 1.78 (m, 4H), 1.77 (s, 3H).  $^{13}\text{C}\{^1\text{H}\}$  NMR (100 MHz,  $\text{CDCl}_3$ )  $\delta$  173.7, 140.5, 114.1, 110.5, 66.7, 44.1, 40.2, 35.8, 28.5, 22.0. HRMS (ESI)  $m/z$ :  $[\text{M}+\text{H}]^+$  calcd for  $\text{C}_{12}\text{H}_{19}\text{N}_2\text{O}_2$  223.1441; found: 223.1437.

## IV. General Procedure and Experimental Details

### 1. General procedure for preparation of products 3

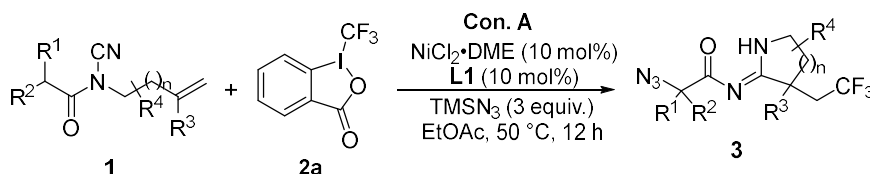

To a flame-dried sealed tube equipped with a magnetic stir bar were added **1** (0.2 mmol, 1 equiv.), Togni's reagent **2a** (0.3 mmol, 1.5 equiv.), NiCl<sub>2</sub>·DME (10 mol%, 0.02 mmol) and L1 (10 mol%, 0.02 mmol). The tube was evacuated and backfilled with nitrogen for three times. Then ethyl acetate (2.0 mL) and TMSN<sub>3</sub> (0.6 mmol, 3 equiv.) were added *via* syringe. The tube was stirred at 50 °C for 12 h. After completion, the mixture was cooled to room temperature, and sat. aq. soln. of NaHCO<sub>3</sub> was added. Then the aqueous phase was extracted with DCM, washed with brine, dried over Na<sub>2</sub>SO<sub>4</sub>. The filtrate was concentrated under reduced pressure and the crude was purified by flash chromatography (silica gel, EtOAc/Petroleum ether (60-90 °C)) to give the desired compounds.

#### Spectral data for (Z)-2-azido-2,2-diphenyl-N-(3-(2,2,2-trifluoroethyl)pyrrolidin-2-ylidene) acetamide (**3a**)

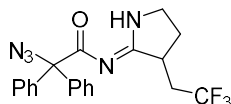

Purified by column chromatography (silica gel, EtOAc/Petroleum ether: 1/5) to afford the title compound (62% yield, 51 mg) as white solid, mp: 133-135 °C. <sup>1</sup>H NMR (500 MHz, CDCl<sub>3</sub>) δ 9.94 (s, 1H), 7.40 – 7.25 (m, 10H), 3.61 – 3.45 (m, 2H), 3.07 – 2.85 (m, 2H), 2.43 – 2.30 (m, 1H), 2.05 – 1.89 (m, 1H), 1.86 – 1.72 (m, 1H). <sup>13</sup>C{<sup>1</sup>H} NMR (125 MHz, CDCl<sub>3</sub>) δ 184.8, 174.9, 140.8, 140.7, 128.5, 128.1, 128.0, 127.9, 126.8 (q, *J* = 276.5 Hz), 78.9, 45.6, 39.5, 35.5 (q, *J* = 28.7 Hz), 27.1. <sup>19</sup>F NMR (470 MHz, CDCl<sub>3</sub>) δ -64.60 (t, *J* = 11.0 Hz). HRMS (ESI) *m/z*: [M+H]<sup>+</sup> calcd for C<sub>20</sub>H<sub>19</sub>F<sub>3</sub>N<sub>5</sub>O 402.1536; found: 402.1521.

#### Spectral data for (Z)-2-azido-2,2-di-p-tolyl-N-(3-(2,2,2-trifluoroethyl)pyrrolidin-2-ylidene) acetamide (**3b**)

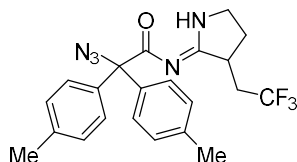

Purified by column chromatography (silica gel, EtOAc/Petroleum ether: 1/3) to afford the title compound (63% yield, 54 mg) as yellowish oil. <sup>1</sup>H NMR (400 MHz, CDCl<sub>3</sub>) δ 9.93 (s, 1H), 7.28 – 7.18 (m, 4H), 7.17 – 7.09 (m, 4H), 3.70 – 3.51 (m, 2H), 3.10 – 2.86 (m, 2H), 2.49 – 2.37 (m, 1H), 2.34 (s, 3H), 2.33 (s, 3H), 2.07 – 1.92 (m, 1H), 1.91 – 1.74 (m, 1H). <sup>13</sup>C{<sup>1</sup>H} NMR (100 MHz, CDCl<sub>3</sub>) δ 185.2, 174.9, 138.0, 137.9, 137.7, 137.6, 128.8, 128.7, 128.4, 128.3, 126.9 (q, *J* = 276.7 Hz), 78.6, 45.6, 39.4 (q, *J* = 2.7 Hz), 35.6 (q, *J* = 29.0 Hz), 27.2, 21.2, 21.1. <sup>19</sup>F NMR (376 MHz, CDCl<sub>3</sub>) δ -64.62 (t, *J* = 11.0 Hz). HRMS (ESI) *m/z*: [M+H]<sup>+</sup> calcd for C<sub>22</sub>H<sub>23</sub>F<sub>3</sub>N<sub>5</sub>O 430.1849; found: 430.1843.

#### Spectral data for (Z)-2-azido-3-phenyl-2-(p-tolyl)-N-(3-(2,2,2-trifluoroethyl)pyrrolidin-2-ylidene) propenamide (**3d**)

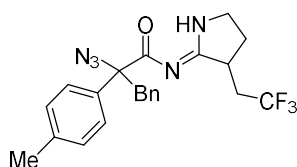

Purified by column chromatography (silica gel, EtOAc/Petroleum ether: 1/5) to afford the title compound (an inseparable mixture, 19% yield, 17 mg, dr = 1.1/1) as yellowish oil. The mixture:  $^1\text{H}$  NMR (400 MHz,  $\text{CDCl}_3$ )  $\delta$  9.91 (s, 2H), 7.32 – 7.27 (m, 4H), 7.21 – 7.15 (m, 6H), 7.15 – 7.07 (m, 8H), 3.68 – 3.53 (m, 6H), 3.30 (d,  $J = 5.5$  Hz, 1H), 3.27 (d,  $J = 5.4$  Hz, 1H), 3.10 – 2.93 (m, 4H), 2.49 – 2.35 (m, 2H), 2.33 (s, 3H), 2.33 (s, 3H), 2.08 – 1.91 (m, 2H), 1.90 – 1.76 (m, 2H).  $^{13}\text{C}\{^1\text{H}\}$  NMR (100 MHz,  $\text{CDCl}_3$ )  $\delta$  185.1, 185.0, 174.9, 174.6, 137.7, 137.6, 136.9, 136.7, 136.6, 130.9, 130.8, 129.2, 129.1, 127.9, 127.8, 126.9 (q,  $J = 274.3$  Hz), 126.7, 126.6, 126.4, 126.3, 75.8, 75.7, 45.6, 45.5, 44.7, 44.5, 39.4 (q,  $J = 3.0$  Hz), 39.3 (q,  $J = 3.0$  Hz), 35.7 (q,  $J = 28.8$  Hz), 35.6 (q,  $J = 29.0$  Hz), 27.2, 27.1, 21.2.  $^{19}\text{F}$  NMR (376 MHz,  $\text{CDCl}_3$ )  $\delta$  -64.64 (t,  $J = 11.0$  Hz, 6F). HRMS (ESI)  $m/z$ :  $[\text{M}+\text{H}]^+$  calcd for  $\text{C}_{22}\text{H}_{23}\text{F}_3\text{N}_5\text{O}$  430.1849; found: 430.1846.

#### Spectral data for (Z)-2-azido-2-methyl-N-(3-(2,2,2-trifluoroethyl)pyrrolidin-2-ylidene) propenamide (3e)

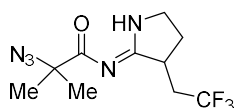

Purified by column chromatography (silica gel, EtOAc/Petroleum ether: 1/5) to afford the title compound (48% yield, 27 mg) as white solid, mp: 70-72 °C.  $^1\text{H}$  NMR (400 MHz,  $\text{CDCl}_3$ )  $\delta$  9.95 (s, 1H), 3.75 – 3.56 (m, 2H), 3.17 – 2.98 (m, 2H), 2.52 – 2.40 (m, 1H), 2.18 – 1.97 (m, 1H), 1.93 – 1.79 (m, 1H), 1.46 (s, 3H), 1.45 (s, 3H).  $^{13}\text{C}\{^1\text{H}\}$  NMR (100 MHz,  $\text{CDCl}_3$ )  $\delta$  187.9, 175.0, 126.9 (q,  $J = 276.3$  Hz), 76.8, 45.5, 39.4 (q,  $J = 2.4$  Hz), 35.8 (q,  $J = 29.0$  Hz), 27.3, 25.0, 24.9.  $^{19}\text{F}$  NMR (376 MHz,  $\text{CDCl}_3$ )  $\delta$  -64.72 (t,  $J = 11.0$  Hz). HRMS (ESI)  $m/z$ :  $[\text{M}+\text{H}]^+$  calcd for  $\text{C}_{10}\text{H}_{15}\text{F}_3\text{N}_5\text{O}$  278.1223; found: 278.1228.

#### Spectral data for (Z)-2-azido-2-propyl-N-(3-(2,2,2-trifluoroethyl)pyrrolidin-2-ylidene) pentanamide (3f)

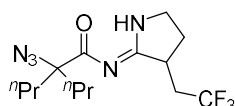

Purified by column chromatography (silica gel, EtOAc/Petroleum ether: 1/5) to afford the title compound (42% yield, 28 mg) as colorless oil.  $^1\text{H}$  NMR (400 MHz,  $\text{CDCl}_3$ )  $\delta$  9.94 (s, 1H), 3.76 – 3.48 (m, 2H), 3.15 – 2.93 (m, 2H), 2.51 – 2.38 (m, 1H), 2.16 – 1.97 (m, 1H), 1.93 – 1.77 (m, 3H), 1.75 – 1.63 (m, 2H), 1.49 – 1.33 (m, 2H), 1.31 – 1.12 (m, 2H), 0.91 (t,  $J = 7.3$  Hz, 3H), 0.90 (t,  $J = 7.3$  Hz, 3H).  $^{13}\text{C}\{^1\text{H}\}$  NMR (100 MHz,  $\text{CDCl}_3$ )  $\delta$  187.3, 174.4, 126.9 (q,  $J = 276.7$  Hz), 72.9, 45.5, 39.4 (q,  $J = 3.1$  Hz), 39.3, 39.2, 35.8 (q,  $J = 29.1$  Hz), 27.2, 17.7, 17.6, 14.5, 14.4.  $^{19}\text{F}$  NMR (376 MHz,  $\text{CDCl}_3$ )  $\delta$  -64.61 (t,  $J = 10.9$  Hz). HRMS (ESI)  $m/z$ :  $[\text{M}+\text{H}]^+$  calcd for  $\text{C}_{14}\text{H}_{23}\text{F}_3\text{N}_5\text{O}$  334.1849; found: 334.1843.

#### Spectral data for (Z)-2-azido-2-methyl-N-(3-(2,2,2-trifluoroethyl)pyrrolidin-2-ylidene) butanamide (3g)

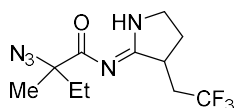

Purified by column chromatography (silica gel, EtOAc/Petroleum ether: 1/5) to afford the title compound (an inseparable mixture, 35% yield, 20 mg, dr = 1/1) as colorless oil. The mixture:  $^1\text{H}$  NMR (400 MHz,  $\text{CDCl}_3$ )  $\delta$  9.95 (s, 2H), 3.72 – 3.55 (m, 4H), 3.15 – 2.95 (m, 4H), 2.53 – 2.38 (m, 2H), 2.16 – 1.99 (m, 2H), 1.89 (q,  $J = 7.4$  Hz,

4H), 1.80 – 1.63 (m, 2H), 1.43 (s, 6H), 0.90 (t,  $J = 7.4$  Hz, 6H).  $^{13}\text{C}\{^1\text{H}\}$  NMR (100 MHz,  $\text{CDCl}_3$ )  $\delta$  187.6, 174.7, 126.9 (q,  $J = 276.6$  Hz), 69.7, 45.5, 39.4 (q,  $J = 3.0$  Hz), 35.8 (q,  $J = 28.8$  Hz), 31.3, 31.2, 27.3, 22.4, 22.3, 8.7.  $^{19}\text{F}$  NMR (376 MHz,  $\text{CDCl}_3$ )  $\delta$  -64.68 (t,  $J = 11.1$  Hz, 3F), -64.70 (t,  $J = 11.0$  Hz, 3F). HRMS (ESI)  $m/z$ :  $[\text{M}+\text{H}]^+$  calcd for  $\text{C}_{11}\text{H}_{17}\text{F}_3\text{N}_5\text{O}$  292.1380; found: 292.1383.

**Spectral data for (Z)-1-azido-N-(3-(2,2,2-trifluoroethyl)pyrrolidin-2-ylidene)cyclobutane-1-carboxamide (3h)**

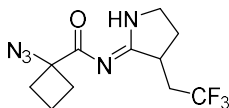

Purified by column chromatography (silica gel, EtOAc/Petroleum ether: 1/5) to afford the title compound (44% yield, 25 mg) as yellowish solid, mp: 69-71 °C.  $^1\text{H}$  NMR (400 MHz,  $\text{CDCl}_3$ )  $\delta$  10.00 (s, 1H), 3.75 – 3.56 (m, 2H), 3.18 – 3.01 (m, 2H), 2.67 – 2.55 (m, 2H), 2.52 – 2.41 (m, 1H), 2.28 – 2.16 (m, 2H), 2.14 – 1.81 (m, 4H).  $^{13}\text{C}\{^1\text{H}\}$  NMR (100 MHz,  $\text{CDCl}_3$ )  $\delta$  186.3, 175.0, 126.9 (q,  $J = 276.6$  Hz), 68.2, 45.5, 39.4 (q,  $J = 2.9$  Hz), 35.8 (q,  $J = 28.9$  Hz), 31.4, 31.2, 27.3, 14.7.  $^{19}\text{F}$  NMR (376 MHz,  $\text{CDCl}_3$ )  $\delta$  -64.71 (t,  $J = 11.0$  Hz). HRMS (ESI)  $m/z$ :  $[\text{M}+\text{H}]^+$  calcd for  $\text{C}_{11}\text{H}_{15}\text{F}_3\text{N}_5\text{O}$  290.1223; found: 290.1214.

**Spectral data for (Z)-1-azido-N-(3-(2,2,2-trifluoroethyl)pyrrolidin-2-ylidene)cyclopentane-1-carboxamide (3i)**

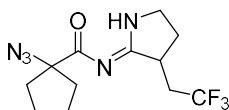

Purified by column chromatography (silica gel, EtOAc/Petroleum ether: 1/5) to afford the title compound (41% yield, 25 mg) as yellowish oil.  $^1\text{H}$  NMR (400 MHz,  $\text{CDCl}_3$ )  $\delta$  9.98 (s, 1H), 3.74 – 3.55 (m, 2H), 3.17 – 2.97 (m, 2H), 2.52 – 2.38 (m, 1H), 2.23 – 1.99 (m, 3H), 1.94 – 1.75 (m, 7H).  $^{13}\text{C}\{^1\text{H}\}$  NMR (100 MHz,  $\text{CDCl}_3$ )  $\delta$  187.7, 174.6, 126.9 (q,  $J = 276.7$  Hz), 77.0, 45.5, 39.4 (q,  $J = 2.9$  Hz), 36.8, 36.6, 35.8 (q,  $J = 28.9$  Hz), 27.3, 24.8, 24.7.  $^{19}\text{F}$  NMR (376 MHz,  $\text{CDCl}_3$ )  $\delta$  -64.72 (t,  $J = 11.0$  Hz). HRMS (ESI)  $m/z$ :  $[\text{M}+\text{H}]^+$  calcd for  $\text{C}_{12}\text{H}_{17}\text{F}_3\text{N}_5\text{O}$  304.1380; found: 304.1370.

**Spectral data for (Z)-3-azido-N-(3-(2,2,2-trifluoroethyl)pyrrolidin-2-ylidene)tetrahydrofuran-3-carboxamide (3j)**

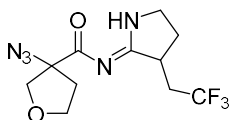

Purified by column chromatography (silica gel, EtOAc/Petroleum ether: 1/5) to afford the title compound (an inseparable mixture, 60% yield, 37 mg, dr = 1/1) as purple solid. The mixture:  $^1\text{H}$  NMR (400 MHz,  $\text{CDCl}_3$ )  $\delta$  10.01 (s, 2H), 4.21 – 3.98 (m, 6H), 3.99 – 3.87 (m, 2H), 3.78 – 3.56 (m, 4H), 3.16 – 2.94 (m, 4H), 2.65 – 2.52 (m, 2H), 2.52 – 2.40 (m, 2H), 2.21 – 2.00 (m, 4H), 1.96 – 1.79 (m, 2H).  $^{13}\text{C}\{^1\text{H}\}$  NMR (100 MHz,  $\text{CDCl}_3$ )  $\delta$  184.3, 184.2, 175.2, 126.8 (q,  $J = 276.5$  Hz), 76.0, 75.7, 75.6, 68.5, 68.4, 45.6, 39.5 (q,  $J = 3.4$  Hz), 37.1, 37.0, 35.7 (q,  $J = 29.1$  Hz), 27.2.  $^{19}\text{F}$  NMR (376 MHz,  $\text{CDCl}_3$ )  $\delta$  -64.73 (q,  $J = 9.8$  Hz, 3F), -64.75 (q,  $J = 10.2$  Hz, 3F). HRMS (ESI)  $m/z$ :  $[\text{M}+\text{H}]^+$  calcd for  $\text{C}_{11}\text{H}_{15}\text{F}_3\text{N}_5\text{O}$  306.1172; found: 306.1177.

**Spectral data for (Z)-1-azido-N-(3-(2,2,2-trifluoroethyl)pyrrolidin-2-ylidene)cyclohexane-1-carboxamide (3k)**

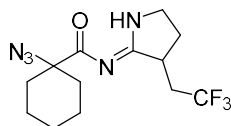

Purified by column chromatography (silica gel, EtOAc/Petroleum ether: 1/5) to afford the title compound (46% yield, 29 mg) as white solid, mp: 123-125 °C. <sup>1</sup>H NMR (400 MHz, CDCl<sub>3</sub>) δ 9.96 (s, 1H), 3.74 – 3.54 (m, 2H), 3.19 – 2.98 (m, 2H), 2.52 – 2.40 (m, 1H), 2.16 – 1.99 (m, 1H), 1.94 – 1.70 (m, 5H), 1.69 – 1.64 (m, 1H), 1.64 – 1.51 (m, 5H). <sup>13</sup>C{<sup>1</sup>H} NMR (100 MHz, CDCl<sub>3</sub>) δ 187.8, 175.0, 127.0 (q, *J* = 276.6 Hz), 68.9, 45.5, 39.4 (q, *J* = 2.9 Hz), 35.9 (q, *J* = 28.9 Hz), 32.3, 32.2, 27.4, 25.3, 22.1. <sup>19</sup>F NMR (376 MHz, CDCl<sub>3</sub>) δ -64.71 (t, *J* = 11.0 Hz). HRMS (ESI) *m/z*: [M+H]<sup>+</sup> calcd for C<sub>13</sub>H<sub>19</sub>F<sub>3</sub>N<sub>5</sub>O 318.1536; found: 318.1539.

**Spectral data for (Z)-4-azido-N-(3-(2,2,2-trifluoroethyl)pyrrolidin-2-ylidene)tetrahydro-2H-pyran-4-carboxamide (3l)**

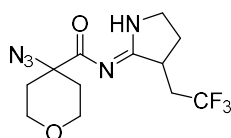

Purified by column chromatography (silica gel, EtOAc/Petroleum ether: 1/3) to afford the title compound (46% yield, 30 mg) as white solid, mp: 113-116 °C. <sup>1</sup>H NMR (400 MHz, CDCl<sub>3</sub>) δ 9.92 (s, 1H), 3.82 – 3.49 (m, 6H), 3.09 – 2.89 (m, 2H), 2.47 – 2.34 (m, 1H), 2.18 – 2.05 (m, 2H), 2.05 – 1.94 (m, 1H), 1.89 – 1.75 (m, 1H), 1.73 – 1.57 (m, 2H). <sup>13</sup>C{<sup>1</sup>H} NMR (100 MHz, CDCl<sub>3</sub>) δ 185.9, 175.4, 126.9 (q, *J* = 276.6 Hz), 66.0, 64.1 64.0, 45.6, 39.5 (q, *J* = 3.0 Hz), 35.8 (q, *J* = 29.0 Hz), 32.4, 32.3, 27.3. <sup>19</sup>F NMR (376 MHz, CDCl<sub>3</sub>) δ -64.74 (t, *J* = 11.0 Hz). HRMS (ESI) *m/z*: [M+H]<sup>+</sup> calcd for C<sub>12</sub>H<sub>17</sub>F<sub>3</sub>N<sub>5</sub>O<sub>2</sub> 320.1329; found: 320.1322.

**Spectral data for (Z)-2-azido-N-(3-methyl-3-(2,2,2-trifluoroethyl)pyrrolidin-2-ylidene)-2,2-diphenylacetamide (3m)**

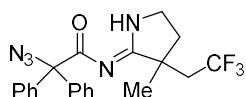

Purified by column chromatography (silica gel, EtOAc/Petroleum ether: 1/5) to afford the title compound (56% yield, 47 mg) as white solid, mp: 118-120 °C. <sup>1</sup>H NMR (400 MHz, CDCl<sub>3</sub>) δ 9.84 (s, 1H), 7.38 – 7.28 (m, 10H), 3.68 – 3.59 (m, 2H), 2.58 – 2.42 (m, 1H), 2.41 – 2.29 (m, 1H), 2.29 – 2.17 (m, 1H), 2.04 – 1.95 (m, 1H), 1.24 (s, 3H). <sup>13</sup>C{<sup>1</sup>H} NMR (100 MHz, CDCl<sub>3</sub>) δ 185.3, 178.3, 140.8, 140.7, 128.4, 127.9, 127.8, 127.7, 127.6, 126.4 (q, *J* = 278.3 Hz), 78.8, 44.5 (q, *J* = 1.9 Hz), 44.2, 40.7 (q, *J* = 27.5 Hz), 31.9, 23.7. <sup>19</sup>F NMR (376 MHz, CDCl<sub>3</sub>) δ -60.38 (t, *J* = 11.4 Hz). HRMS (ESI) *m/z*: [M+H]<sup>+</sup> calcd for C<sub>21</sub>H<sub>21</sub>F<sub>3</sub>N<sub>5</sub>O 416.1693; found: 416.1703.

**Spectral data for (Z)-2-azido-2,2-diphenyl-N-(3-phenyl-3-(2,2,2-trifluoroethyl)pyrrolidin-2-ylidene)acetamide (3n)**

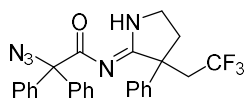

Purified by column chromatography (silica gel, EtOAc/Petroleum ether: 1/5) to afford the title compound (18% yield, 17 mg) as yellowish oil. <sup>1</sup>H NMR (400 MHz, CDCl<sub>3</sub>) δ 9.84 (s, 1H), 7.45 – 7.40 (m, 2H), 7.39 – 7.30 (m, 10H), 7.28 – 7.22 (m, 3H), 3.69 – 3.60 (m, 1H), 3.59 – 3.48 (m, 1H), 3.03 – 2.79 (m, 2H), 2.69 – 2.50 (m, 1H), 2.46

– 2.32 (m, 1H).  $^{13}\text{C}\{\text{H}^1\}$  NMR (100 MHz,  $\text{CDCl}_3$ )  $\delta$  184.9, 176.0, 140.8, 140.4, 137.4, 128.8, 128.7, 128.2, 128.1, 128.0, 127.9, 127.8, 126.5, 126.1 (q,  $J = 278.4$  Hz), 79.3, 51.0 (q,  $J = 2.3$  Hz), 44.3, 42.6 (q,  $J = 27.1$  Hz), 31.3.  $^{19}\text{F}$  NMR (376 MHz,  $\text{CDCl}_3$ )  $\delta$  -60.25 (t,  $J = 10.9$  Hz). HRMS (ESI)  $m/z$ :  $[\text{M}+\text{H}]^+$  calcd for  $\text{C}_{26}\text{H}_{23}\text{F}_3\text{N}_5\text{O}$  478.1849; found: 478.1828.

**Spectral data for (Z)-2,2-diphenyl-2-(4-phenyl-1H-1,2,3-triazol-1-yl)-N-(6-(trifluoromethyl)-2-azaspiro[4.4]nonan-1-ylidene)acetamide (3o)**

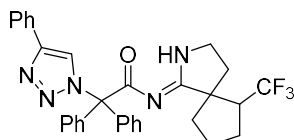

According to the general procedure, upon completion, the mixture was cooled to room temperature, diluted with EtOAc (10 mL), and filtered with a pad of silica gel, the filtrate was concentrated under reduced pressure. Then the residue and CuI (20 mol%, 0.04 mmol) were added in a 25 mL oven-dried sealed tube. The tube was evacuated and backfilled with  $\text{N}_2$  for three times, after that, phenylacetylene (0.6 mmol, 3.0 equiv.) and THF (2.0 mL) were then added via syringe under  $\text{N}_2$ . The tube was sealed with a Teflon lined cap and moved into a preheated oil bath at 60  $^\circ\text{C}$  for 24 h. The reaction mixture was then cooled to room temperature, diluted with EtOAc (10 mL) and filtered through a pad of Celite. The filtrate was concentrated, and the residue was then purified by column chromatography (silica gel, EtOAc/Petroleum ether: 1/2) to afford the title compound (35% yield, 38 mg, dr > 19/1) as yellowish oil.  $^1\text{H}$  NMR (400 MHz,  $\text{CDCl}_3$ )  $\delta$  9.79 (s, 1H), 7.93 (s, 1H), 7.81 (d,  $J = 7.6$  Hz, 2H), 7.42 – 7.27 (m, 13H), 3.67 – 3.49 (m, 2H), 2.93 – 2.75 (m, 1H), 2.42 – 2.25 (m, 1H), 1.90 – 1.77 (m, 2H), 1.76 – 1.53 (m, 5H).  $^{13}\text{C}\{\text{H}^1\}$  NMR (100 MHz,  $\text{CDCl}_3$ )  $\delta$  183.0, 178.0, 140.3, 131.2, 129.7, 128.8, 128.3, 128.2, 128.0, 127.9, 127.4 (q,  $J = 278.5$  Hz), 125.8, 80.5, 55.1, 48.3 (q,  $J = 26.4$  Hz), 44.6, 39.0, 28.9, 25.4 (q,  $J = 2.2$  Hz), 22.7.  $^{19}\text{F}$  NMR (470 MHz,  $\text{CDCl}_3$ )  $\delta$  -65.45 (d,  $J = 9.8$  Hz). HRMS (ESI)  $m/z$ :  $[\text{M}+\text{H}]^+$  calcd for  $\text{C}_{31}\text{H}_{29}\text{F}_3\text{N}_5\text{O}$  544.2319; found: 544.2306.

**Spectral data for (Z)-2-azido-2,2-diphenyl-N-(6-(trifluoromethyl)-2-azaspiro[4.5]decan-1-ylidene)acetamide (3p)**

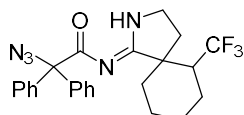

Purified by column chromatography (silica gel, EtOAc/Petroleum ether: 1/8) to afford the title compound (56% yield, 51 mg, dr > 19/1) as yellowish oil.  $^1\text{H}$  NMR (500 MHz,  $\text{CDCl}_3$ )  $\delta$  9.93 (s, 1H), 7.43 – 7.30 (m, 10H), 3.71 – 3.53 (m, 2H), 2.74 – 2.61 (m, 1H), 2.35 – 2.24 (m, 1H), 1.98 – 1.89 (m, 2H), 1.87 – 1.78 (m, 1H), 1.77 – 1.63 (m, 2H), 1.56 – 1.47 (m, 1H), 1.47 – 1.22 (m, 3H).  $^{13}\text{C}\{\text{H}^1\}$  NMR (125 MHz,  $\text{CDCl}_3$ )  $\delta$  185.3, 179.1, 141.1, 141.0, 128.7, 128.6, 127.9, 127.8, 127.7, 127.6, 127.3 (q,  $J = 281.6$  Hz), 78.9, 49.2, 45.4 (q,  $J = 24.2$  Hz), 44.4, 36.4, 25.2, 24.3, 22.7, 21.7.  $^{19}\text{F}$  NMR (376 MHz,  $\text{CDCl}_3$ )  $\delta$  -66.74 (d,  $J = 9.1$  Hz). HRMS (ESI)  $m/z$ :  $[\text{M}+\text{H}]^+$  calcd for  $\text{C}_{24}\text{H}_{25}\text{F}_3\text{N}_5\text{O}$  456.2006; found: 456.1997.

**Spectral data for (Z)-2,2-diphenyl-2-(4-phenyl-1H-1,2,3-triazol-1-yl)-N-(5-phenyl-3-(2,2,2-trifluoroethyl)pyrrolidin-2-ylidene)acetamide (3q)**

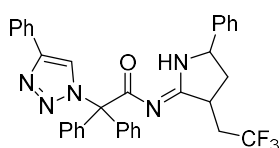

According to the general procedure, upon completion, the mixture was cooled to room temperature, diluted with EtOAc (10 mL), and filtered with a pad of silica gel, the filtrate was concentrated under reduced pressure. Then the residue and CuI (20 mol%, 0.04 mmol) were added in a 25 mL oven-dried sealed tube. The tube was evacuated and backfilled with N<sub>2</sub> for three times, after that, phenylacetylene (0.6 mmol, 3.0 equiv.) and THF (2.0 mL) were then added via syringe under N<sub>2</sub>. The tube was sealed with a Teflon lined cap and moved into a preheated oil bath at 60 °C for 24 h. The reaction mixture was then cooled to room temperature, diluted with EtOAc (10 mL) and filtered through a pad of Celite. The filtrate was concentrated, and the residue was then purified by column chromatography (silica gel, EtOAc/Petroleum ether: 1/8) to afford the title compound (an inseparable mixture, 39% yield, 45 mg, dr = 1.8/1) as yellowish solid. The major isomer: <sup>1</sup>H NMR (500 MHz, CDCl<sub>3</sub>) δ 9.94 (s, 1H), 7.85 – 7.77 (m, 3H), 7.43 – 7.22 (m, 17H), 7.20 – 7.15 (m, 1H), 4.89 (dd, *J* = 9.9, 6.4 Hz, 1H), 3.17 – 3.01 (m, 1H), 2.80 – 2.71 (m, 1H), 2.35 – 2.26 (m, 1H), 2.02 – 1.85 (m, 1H), 1.75 – 1.63 (m, 1H). The minor isomer: <sup>1</sup>H NMR (500 MHz, CDCl<sub>3</sub>) δ 9.94 (s, 1H), 7.85 – 7.77 (m, 3H), 7.43 – 7.22 (m, 17H), 7.20 – 7.15 (m, 1H), 4.98 (dd, *J* = 7.9, 3.5 Hz, 1H), 3.17 – 3.01 (m, 1H), 2.71 – 2.61 (m, 1H), 2.59 – 2.50 (m, 1H), 2.02 – 1.85 (m, 1H), 1.75 – 1.63 (m, 1H). <sup>13</sup>C{<sup>1</sup>H} NMR (125 MHz, CDCl<sub>3</sub>) δ 182.6, 174.0, 173.6, 145.9, 140.0, 139.9, 139.2, 131.0, 129.9, 129.7, 129.3, 128.9, 128.8, 128.6, 128.5, 128.1, 128.0, 126.6 (q, *J* = 278.4 Hz), 126.2, 125.8, 125.6, 123.0, 80.5, 62.1, 61.2, 40.2, 38.1, 37.9, 35.6 (q, *J* = 28.7 Hz), 35.5 (q, *J* = 28.8 Hz), 29.8. The major isomer: <sup>19</sup>F NMR (470 MHz, CDCl<sub>3</sub>) δ -64.67 (t, *J* = 10.9 Hz). The minor isomer: <sup>19</sup>F NMR (470 MHz, CDCl<sub>3</sub>) δ -64.57 (t, *J* = 10.9 Hz). HRMS (ESI) *m/z*: [M+H]<sup>+</sup> calcd for C<sub>34</sub>H<sub>29</sub>F<sub>3</sub>N<sub>5</sub>O 580.2319; found: 580.2325.

**Spectral data for (Z)-2-azido-N-(4,4-dimethyl-3-(2,2,2-trifluoroethyl)pyrrolidin-2-ylidene)-2,2-diphenylacetamide (3r)**

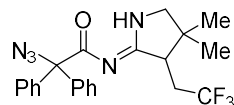

Purified by column chromatography (silica gel, EtOAc/Petroleum ether: 1/5) to afford the title compound (61% yield, 52 mg) as yellowish oil. <sup>1</sup>H NMR (400 MHz, CDCl<sub>3</sub>) δ 9.78 (s, 1H), 7.38 – 7.26 (m, 10H), 3.37 (d, *J* = 10.8 Hz, 1H), 3.21 (d, *J* = 11.0 Hz, 1H), 2.98 – 2.82 (m, 1H), 2.79 – 2.71 (m, 1H), 2.14 – 1.97 (m, 1H), 1.23 (s, 3H), 1.00 (s, 3H). <sup>13</sup>C{<sup>1</sup>H} NMR (100 MHz, CDCl<sub>3</sub>) δ 184.8, 174.6, 140.9, 140.8, 128.1, 128.0, 127.9, 127.8, 126.8 (q, *J* = 276.0 Hz), 78.9, 59.0, 49.0 (q, *J* = 2.7 Hz), 39.4, 29.5 (q, *J* = 30.0 Hz), 25.0 (q, *J* = 1.9 Hz), 22.0. <sup>19</sup>F NMR (376 MHz, CDCl<sub>3</sub>) δ -63.72 (t, *J* = 11.5 Hz). HRMS (ESI) *m/z*: [M+H]<sup>+</sup> calcd for C<sub>22</sub>H<sub>23</sub>F<sub>3</sub>N<sub>5</sub>O 430.1849; found: 430.1862.

**Spectral data for (Z)-2,2-diphenyl-2-(4-phenyl-1H-1,2,3-triazol-1-yl)-N-(9-(2,2,2-trifluoroethyl)-7-azaspiro[4.5]decan-8-ylidene)acetamide (3s)**

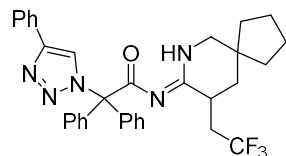

According to the general procedure, upon completion, the mixture was cooled to room temperature, diluted with EtOAc (10 mL), and filtered with a pad of silica gel, the filtrate was concentrated under reduced pressure. Then the residue and CuI (20 mol%, 0.04 mmol) were added in a 25 mL oven-dried sealed tube. The tube was evacuated and backfilled with N<sub>2</sub> for three times, after that, phenylacetylene (0.6 mmol, 3.0 equiv.) and THF (2.0 mL) were then added via syringe under N<sub>2</sub>. The tube was sealed with a Teflon lined cap and moved into a preheated oil bath at 60 °C for 24 h. The reaction mixture was then cooled to room temperature, diluted with EtOAc (10 mL) and filtered



through a pad of Celite. The filtrate was concentrated, and the residue was then purified by column chromatography (silica gel, EtOAc/Petroleum ether: 1/8) to afford the title compound (8% yield, 10 mg) as yellowish oil.  $^1\text{H}$  NMR (500 MHz,  $\text{CDCl}_3$ )  $\delta$  11.36 (s, 1H), 7.80 (d,  $J = 7.7$  Hz, 2H), 7.77 (s, 1H), 7.40 – 7.27 (m, 13H), 3.24 – 3.08 (m, 2H), 2.76 – 2.62 (m, 2H), 1.99 – 1.85 (m, 2H), 1.80 – 1.72 (m, 1H), 1.70 – 1.58 (m, 5H), 1.53 – 1.40 (m, 3H).  $^{13}\text{C}\{^1\text{H}\}$  NMR (125 MHz,  $\text{CDCl}_3$ )  $\delta$  182.1, 171.2, 145.8, 140.4, 140.3, 131.1, 130.0, 129.7, 128.8, 128.3, 128.0, 127.9, 126.8 (q,  $J = 276.6$  Hz), 125.8, 123.0, 80.6, 51.9, 40.4, 38.5, 37.8, 35.9 (q,  $J = 28.1$  Hz), 35.0, 34.0, 24.8, 24.2.  $^{19}\text{F}$  NMR (470 MHz,  $\text{CDCl}_3$ )  $\delta$  -63.25 (t,  $J = 11.3$  Hz). HRMS (ESI)  $m/z$ :  $[\text{M}+\text{H}]^+$  calcd for  $\text{C}_{33}\text{H}_{33}\text{F}_3\text{N}_5\text{O}$  572.2632; found: 572.2622.

## 2. General procedure for preparation of products 4

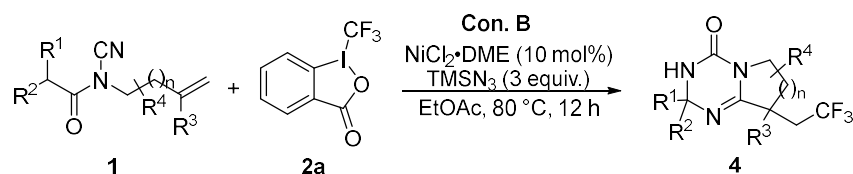

To a flame-dried sealed tube equipped with a magnetic stir bar were added **1** (0.2 mmol, 1 equiv.), Togni's reagent **2a** (0.3 mmol, 1.5 equiv.) and  $\text{NiCl}_2\cdot\text{DME}$  (10 mol %, 0.02 mmol). The tube was evacuated and backfilled with nitrogen for three times. Then ethyl acetate (2.0 mL) and  $\text{TMSN}_3$  (0.6 mmol, 3 equiv.) were added *via* syringe. The tube was stirred at 80  $^\circ\text{C}$  for 12 h. After completion, the mixture was cooled to room temperature, and sat. aq. soln. of  $\text{NaHCO}_3$  was added. Then the aqueous phase was extracted with DCM, washed with brine, dried over  $\text{Na}_2\text{SO}_4$ . The filtrate was concentrated under reduced pressure and the crude was purified by flash chromatography (silica gel, EtOAc/Petroleum ether (60-90  $^\circ\text{C}$ )) to give the desired compounds **4**.

### Spectral data for 2,2-diphenyl-8-(2,2,2-trifluoroethyl)-2,6,7,8-tetrahydropyrrolo[1,2-a][1,3,5]triazine-4(3H)-one (**4a**)

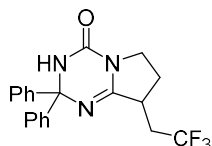

Purified by column chromatography (silica gel, EtOAc/Petroleum ether: 1/3) to afford the title compound (63% yield, 48 mg) as white solid, mp: 205-207  $^\circ\text{C}$ .  $^1\text{H}$  NMR (400 MHz,  $\text{CDCl}_3$ )  $\delta$  7.44 – 7.23 (m, 10H), 5.85 (brs, 1H), 3.83 (t,  $J = 9.7$  Hz, 1H), 3.59 – 3.44 (m, 1H), 3.15 – 2.96 (m, 2H), 2.47 – 2.34 (m, 1H), 2.19 – 1.99 (m, 1H), 1.82 – 1.65 (m, 1H).  $^{13}\text{C}\{^1\text{H}\}$  NMR (100 MHz,  $\text{CDCl}_3$ )  $\delta$  157.4, 151.1, 145.4, 145.3, 128.5, 128.4, 126.8 (q,  $J = 276.7$  Hz), 126.4, 126.1, 79.4, 43.3, 36.8 (q,  $J = 2.9$  Hz), 35.9 (q,  $J = 29.1$  Hz), 27.3.  $^{19}\text{F}$  NMR (376 MHz,  $\text{CDCl}_3$ )  $\delta$  -64.67 (t,  $J = 11.0$  Hz). HRMS (ESI)  $m/z$ :  $[\text{M}+\text{H}]^+$  calcd for  $\text{C}_{20}\text{H}_{19}\text{F}_3\text{N}_3\text{O}$  374.1475; found: 374.1482.

### Spectral data for 2,2-di-p-tolyl-8-(2,2,2-trifluoroethyl)-2,6,7,8-tetrahydropyrrolo[1,2-a][1,3,5]triazin-4(3H)-one (**4b**)

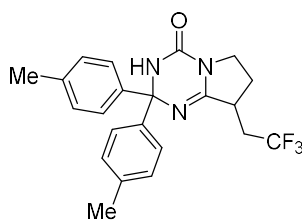

Purified by column chromatography (silica gel, EtOAc/Petroleum ether: 1/3) to afford the title compound (51% yield, 41 mg) as yellowish oil.  $^1\text{H}$  NMR (400 MHz,  $\text{CDCl}_3$ )  $\delta$  7.27 – 7.19 (m, 4H), 7.15 – 7.09 (m, 4H), 5.67 (brs, 1H), 3.89 – 3.76 (m, 1H), 3.59 – 3.45 (m, 1H), 3.13 – 2.96 (m, 2H), 2.49 – 2.37 (m, 1H), 2.33 (s, 3H), 2.32 (s, 3H), 2.16 – 2.01 (m, 1H), 1.81 – 1.68 (m, 1H).  $^{13}\text{C}\{^1\text{H}\}$  NMR (100 MHz,  $\text{CDCl}_3$ )  $\delta$  157.1, 151.1, 142.7, 142.5, 137.8, 137.6, 129.2, 129.1, 126.8 (q,  $J = 276.6$  Hz), 126.3, 126.0, 79.2, 43.3, 36.7 (q,  $J = 3.1$  Hz), 35.9 (q,  $J = 29.2$  Hz), 27.4, 21.2, 21.1.  $^{19}\text{F}$  NMR (376 MHz,  $\text{CDCl}_3$ )  $\delta$  -64.69 (t,  $J = 11.0$  Hz). HRMS (ESI)  $m/z$ :  $[\text{M}+\text{H}]^+$  calcd for  $\text{C}_{22}\text{H}_{23}\text{F}_3\text{N}_3\text{O}$  402.1788; found: 402.1775.

**Spectral data for 2,2-bis(4-bromophenyl)-8-(2,2,2-trifluoroethyl)-2,6,7,8-tetrahydropyrrolo [1,2-a][1,3,5]triazin-4(3H)-one (4c)**

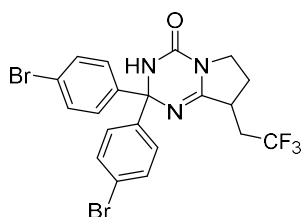

Purified by column chromatography (silica gel, EtOAc/Petroleum ether: 1/2) to afford the title compound (57% yield, 61 mg) as yellowish solid, mp: 208-210 °C.  $^1\text{H}$  NMR (400 MHz,  $\text{CDCl}_3$ )  $\delta$  7.52 – 7.45 (m, 4H), 7.31 – 7.20 (m, 4H), 5.88 (brs, 1H), 3.96 – 3.74 (m, 1H), 3.64 – 3.47 (m, 1H), 3.23 – 2.88 (m, 2H), 2.63 – 2.35 (m, 1H), 2.19 – 1.97 (m, 1H), 1.91 – 1.70 (m, 1H).  $^{13}\text{C}\{^1\text{H}\}$  NMR (100 MHz,  $\text{CDCl}_3$ )  $\delta$  157.9, 151.3, 144.1, 144.0, 131.7, 131.6, 128.2, 127.9, 126.6 (q,  $J = 276.6$  Hz), 122.4, 122.2, 78.7, 43.4, 36.8 (q,  $J = 3.0$  Hz), 35.8 (q,  $J = 29.2$  Hz), 27.3.  $^{19}\text{F}$  NMR (376 MHz,  $\text{CDCl}_3$ )  $\delta$  -64.67 (t,  $J = 10.8$  Hz). HRMS (ESI)  $m/z$ :  $[\text{M}+\text{H}]^+$  calcd for  $\text{C}_{20}\text{H}_{17}\text{Br}_2\text{F}_3\text{N}_3\text{O}$  529.9685; found: 529.9682.

**Spectral data for 2-benzyl-3-methyl-2-(p-tolyl)-8-(2,2,2-trifluoroethyl)-2,6,7,8-tetrahydropyrrolo [1,2-a][1,3,5]triazin-4(3H)-one (4d)**

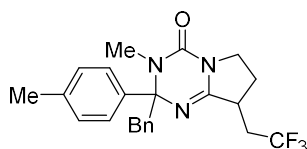

According to the general procedure, upon completion, the mixture was cooled to room temperature, diluted with EtOAc (10 mL), and filtered with a pad of silica gel, the filtrate was concentrated under reduced pressure. Then to a solution of residue in THF (0.8 mL) was added NaH (2.0 equiv) and MeI (1.2 equiv) at 0 °C. The resulting mixture was warmed to room temperature for 20 h. After completion, the solvent was evaporated and the residue was dissolved in EtOAc, washed with  $\text{H}_2\text{O}$  and brine. The organic layer was dried over  $\text{MgSO}_4$ , filtered, and concentrated under reduced pressure. The residue was purified by column chromatography (silica gel, EtOAc/Petroleum ether: 1/3) to afford the title compound (an inseparable mixture, 30% yield, 25 mg, dr = 1.1/1) as yellowish oil. The mixture:  $^1\text{H}$  NMR (500 MHz,  $\text{CDCl}_3$ )  $\delta$  7.41 – 7.34 (m, 4H), 7.32 – 7.27 (m, 5H), 7.25 – 7.11 (m, 9H), 3.64 – 3.53 (m, 3H), 3.27 (d,  $J = 7.0$  Hz, 1H), 3.25 (d,  $J = 7.0$  Hz, 1H), 3.23 – 3.17 (m, 1H), 3.14 – 3.08 (m, 1H), 2.94 – 2.85 (m, 1H), 2.84 – 2.77 (m, 2H), 2.75 (s, 6H), 2.72 – 2.65 (m, 1H), 2.64 – 2.56 (m, 1H), 2.37 (s, 6H), 2.15 – 2.07 (m, 1H), 2.07 – 1.96 (m, 2H), 1.95 – 1.83 (m, 1H), 1.61 – 1.53 (m, 1H), 1.12 – 0.99 (m, 1H).  $^{13}\text{C}\{^1\text{H}\}$  NMR (100 MHz,  $\text{CDCl}_3$ )  $\delta$  155.9, 155.3, 151.1, 150.8, 141.1, 138.1, 138.0, 136.0, 135.9, 131.0, 130.8, 129.3, 129.2, 127.7, 127.6, 127.1, 127.0, 126.7 (q,  $J = 276.7$  Hz), 126.5, 126.4, 82.9, 82.8, 42.8, 42.7, 41.7, 41.3, 36.6 (q,  $J = 2.9$  Hz), 36.5 (q,  $J = 3.0$  Hz), 35.6 (q,  $J = 28.9$  Hz), 35.3 (q,  $J = 28.9$  Hz), 30.2, 30.1, 27.0, 26.8, 21.1.  $^{19}\text{F}$  NMR (470

MHz, CDCl<sub>3</sub>)  $\delta$  -64.81 (t,  $J$  = 11.0 Hz), -64.92 (t,  $J$  = 11.1 Hz). HRMS (ESI)  $m/z$ :  $[M+H]^+$  calcd for C<sub>23</sub>H<sub>25</sub>F<sub>3</sub>N<sub>3</sub>O 416.1944; found: 416.1964.

**Spectral data for 2,2-dimethyl-8-(2,2,2-trifluoroethyl)-2,6,7,8-tetrahydropyrrolo[1,2-a][1,3,5]triazin-4(3H)-one (4e)**

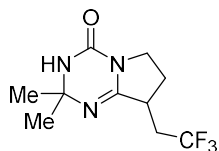

Purified by column chromatography (silica gel, EtOAc/Petroleum ether: 1/1) to afford the title compound (47% yield, 24 mg) as yellowish oil. <sup>1</sup>H NMR (400 MHz, CDCl<sub>3</sub>)  $\delta$  5.43 (brs, 1H), 3.90 – 3.81 (m, 1H), 3.57 – 3.46 (m, 1H), 3.02 – 2.92 (m, 1H), 2.92 – 2.81 (m, 1H), 2.48 – 2.36 (m, 1H), 2.15 – 1.99 (m, 1H), 1.87 – 1.71 (m, 1H), 1.44 (s, 3H), 1.39 (s, 3H). <sup>13</sup>C{<sup>1</sup>H} NMR (100 MHz, CDCl<sub>3</sub>)  $\delta$  156.5, 151.8, 126.8 (q,  $J$  = 276.7 Hz), 72.4, 43.0, 36.4 (q,  $J$  = 2.9 Hz), 35.9 (q,  $J$  = 29.0 Hz), 31.1, 30.6, 27.4. <sup>19</sup>F NMR (376 MHz, CDCl<sub>3</sub>)  $\delta$  -64.68 (t,  $J$  = 10.8 Hz). HRMS (ESI)  $m/z$ :  $[M+H]^+$  calcd for C<sub>10</sub>H<sub>15</sub>F<sub>3</sub>N<sub>3</sub>O 250.1162; found: 250.1169.

**Spectral data for 2,2-dipropyl-8-(2,2,2-trifluoroethyl)-2,6,7,8-tetrahydropyrrolo[1,2-a][1,3,5]triazin-4(3H)-one (4f)**

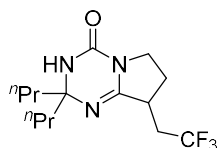

Purified by column chromatography (silica gel, EtOAc/Petroleum ether: 1/3) to afford the title compound (45% yield, 28 mg) as yellowish oil. <sup>1</sup>H NMR (400 MHz, CDCl<sub>3</sub>)  $\delta$  5.04 (brs, 1H), 3.84 – 3.71 (m, 1H), 3.44 – 3.34 (m, 1H), 2.99 – 2.72 (m, 2H), 2.39 – 2.26 (m, 1H), 2.07 – 1.91 (m, 1H), 1.77 – 1.63 (m, 1H), 1.61 – 1.49 (m, 2H), 1.46 – 1.35 (m, 2H), 1.34 – 1.23 (m, 2H), 1.21 – 1.12 (m, 2H), 0.84 (t,  $J$  = 7.2 Hz, 3H),  $\delta$  0.83 (t,  $J$  = 7.3 Hz, 3H). <sup>13</sup>C{<sup>1</sup>H} NMR (100 MHz, CDCl<sub>3</sub>)  $\delta$  156.1, 151.9, 126.8 (q,  $J$  = 276.7 Hz), 77.8, 45.2, 45.0, 42.7, 36.5 (q,  $J$  = 2.8 Hz), 36.0 (q,  $J$  = 28.9 Hz), 27.4, 16.7, 16.6, 14.3, 14.2. <sup>19</sup>F NMR (376 MHz, CDCl<sub>3</sub>)  $\delta$  -64.69 (t,  $J$  = 10.9 Hz). HRMS (ESI)  $m/z$ :  $[M+H]^+$  calcd for C<sub>14</sub>H<sub>23</sub>F<sub>3</sub>N<sub>3</sub>O 306.1788; found: 306.1783.

**Spectral data for 2-ethyl-2-methyl-8-(2,2,2-trifluoroethyl)-2,6,7,8-tetrahydropyrrolo[1,2-a][1,3,5]triazin-4(3H)-one (4g)**

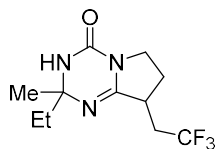

Purified by column chromatography (silica gel, EtOAc/Petroleum ether: 1/2) to afford the title compound (an inseparable mixture, 53% yield, 28 mg, dr = 1.2/1) as yellowish oil. The major isomer: <sup>1</sup>H NMR (400 MHz, CDCl<sub>3</sub>)  $\delta$  5.53 (brs, 1H), 3.92 – 3.78 (m, 1H), 3.56 – 3.43 (m, 1H), 3.05 – 2.77 (m, 2H), 2.46 – 2.34 (m, 1H), 2.16 – 1.97 (m, 1H), 1.85 – 1.74 (m, 1H), 1.73 – 1.53 (m, 2H), 1.39 (s, 3H), 0.88 (t,  $J$  = 7.5 Hz, 3H). The minor isomer: <sup>1</sup>H NMR (400 MHz, CDCl<sub>3</sub>)  $\delta$  5.48 (brs, 1H), 3.92 – 3.78 (m, 1H), 3.56 – 3.43 (m, 1H), 3.05 – 2.77 (m, 2H), 2.46 – 2.34 (m, 1H), 2.16 – 1.97 (m, 1H), 1.85 – 1.74 (m, 1H), 1.73 – 1.53 (m, 2H), 1.34 (s, 3H), 0.88 (t,  $J$  = 7.5 Hz, 3H). <sup>13</sup>C{<sup>1</sup>H} NMR (100 MHz, CDCl<sub>3</sub>)  $\delta$  156.5, 156.4, 152.1, 151.9, 126.8 (q,  $J$  = 276.7 Hz), 126.7 (q,  $J$  = 276.7 Hz), 75.3, 75.1, 42.9, 36.6 (q,  $J$  = 2.9 Hz), 36.4 (q,  $J$  = 2.7 Hz), 36.3, 36.2, 36.0 (q,  $J$  = 28.9 Hz), 35.9 (q,  $J$  = 28.9 Hz), 29.7, 29.4,

27.4, 27.3, 8.0, 7.9. The mixture:  $^{19}\text{F}$  NMR (376 MHz,  $\text{CDCl}_3$ )  $\delta$  -64.69 (t,  $J = 10.9$  Hz). HRMS (ESI)  $m/z$ :  $[\text{M}+\text{H}]^+$  calcd for  $\text{C}_{11}\text{H}_{17}\text{F}_3\text{N}_3\text{O}$  264.1318; found: 264.1328.

**Spectral data for 8'-(2,2,2-trifluoroethyl)-7',8'-dihydro-6'H-spiro[cyclobutane-1,2'-pyrrolo[1,2-a][1,3,5]triazin]-4'(3'H)-one (4h)**

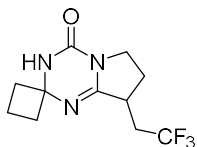

Purified by column chromatography (silica gel, EtOAc/Petroleum ether: 1/2) to afford the title compound (52% yield, 27 mg) as yellowish oil.  $^1\text{H}$  NMR (500 MHz,  $\text{CDCl}_3$ )  $\delta$  5.42 (brs, 1H), 3.92 – 3.75 (m, 1H), 3.55 – 3.41 (m, 1H), 3.04 – 2.86 (m, 2H), 2.49 – 2.32 (m, 2H), 2.30 – 2.15 (m, 3H), 2.14 – 2.03 (m, 1H), 2.03 – 1.89 (m, 1H), 1.86 – 1.67 (m, 2H).  $^{13}\text{C}\{\text{H}^1\}$  NMR (100 MHz,  $\text{CDCl}_3$ )  $\delta$  156.2, 151.5, 126.8 (q,  $J = 276.7$  Hz), 75.1, 42.9, 40.9, 40.1, 36.4 (q,  $J = 2.9$  Hz), 35.9 (q,  $J = 28.8$  Hz), 27.4, 12.8.  $^{19}\text{F}$  NMR (376 MHz,  $\text{CDCl}_3$ )  $\delta$  -64.68 (t,  $J = 11.0$  Hz). HRMS (ESI)  $m/z$ :  $[\text{M}+\text{H}]^+$  calcd for  $\text{C}_{11}\text{H}_{15}\text{F}_3\text{N}_3\text{O}$  262.1162; found: 262.1155.

**Spectral data for 8'-(2,2,2-trifluoroethyl)-7',8'-dihydro-6'H-spiro[cyclopentane-1,2'-pyrrolo[1,2-a][1,3,5]triazin]-4'(3'H)-one (4i)**

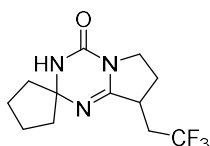

Purified by column chromatography (silica gel, EtOAc/Petroleum ether: 1/2) to afford the title compound (63% yield, 35 mg) as white solid, mp: 140-142 °C.  $^1\text{H}$  NMR (400 MHz,  $\text{CDCl}_3$ )  $\delta$  5.95 (brs, 1H), 3.88 – 3.80 (m, 1H), 3.54 – 3.45 (m, 1H), 3.02 – 2.79 (m, 2H), 2.47 – 2.34 (m, 1H), 2.17 – 1.99 (m, 1H), 1.96 – 1.88 (m, 1H), 1.87 – 1.63 (m, 8H).  $^{13}\text{C}\{\text{H}^1\}$  NMR (100 MHz,  $\text{CDCl}_3$ )  $\delta$  156.3, 152.2, 126.8 (q,  $J = 276.7$  Hz), 82.1, 43.0, 42.1, 41.9, 36.3 (q,  $J = 3.1$  Hz), 35.9 (q,  $J = 28.8$  Hz), 27.4, 22.9, 22.8.  $^{19}\text{F}$  NMR (376 MHz,  $\text{CDCl}_3$ )  $\delta$  -64.67 (t,  $J = 11.0$  Hz). HRMS (ESI)  $m/z$ :  $[\text{M}+\text{H}]^+$  calcd for  $\text{C}_{12}\text{H}_{17}\text{F}_3\text{N}_3\text{O}$  276.1318; found: 276.1327.

**Spectral data for 8'-(2,2,2-trifluoroethyl)-7',8'-dihydro-6'H-spiro[cyclohexane-1,2'-pyrrolo[1,2-a][1,3,5]triazin]-4'(3'H)-one (4k)**

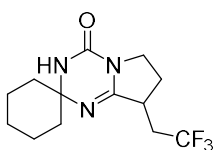

Purified by column chromatography (silica gel, EtOAc/Petroleum ether: 1/1) to afford the title compound (49% yield, 28 mg) as yellowish solid, mp: 154-156 °C.  $^1\text{H}$  NMR (400 MHz,  $\text{CDCl}_3$ )  $\delta$  5.29 (brs, 1H), 3.91 – 3.77 (m, 1H), 3.56 – 3.43 (m, 1H), 3.04 – 2.81 (m, 2H), 2.50 – 2.34 (m, 1H), 2.19 – 1.96 (m, 1H), 1.86 – 1.62 (m, 5H), 1.63 – 1.41 (m, 6H).  $^{13}\text{C}\{\text{H}^1\}$  NMR (100 MHz,  $\text{CDCl}_3$ )  $\delta$  156.1, 151.8, 126.8 (q,  $J = 276.7$  Hz), 73.6, 43.0, 39.5, 39.1, 36.4 (q,  $J = 2.8$  Hz), 36.0 (q,  $J = 28.9$  Hz), 27.5, 25.2, 21.9, 21.8.  $^{19}\text{F}$  NMR (376 MHz,  $\text{CDCl}_3$ )  $\delta$  -64.64 (t,  $J = 10.9$  Hz). HRMS (ESI)  $m/z$ :  $[\text{M}+\text{H}]^+$  calcd for  $\text{C}_{13}\text{H}_{19}\text{F}_3\text{N}_3\text{O}$  290.1475; found: 290.1484.

**Spectral data for 8'-(2,2,2-trifluoroethyl)-2,3,5,6,7',8'-hexahydro-6'H-spiro[pyran-4,2'-pyrrolo[1,2-a][1,3,5]triazin]-4'(3'H)-one (4l)**

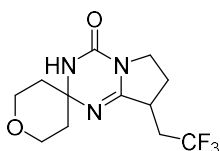

Purified by column chromatography (silica gel, EtOAc/Petroleum ether: 2/1) to afford the title compound (49% yield, 29 mg) as yellowish solid, mp: 169-171 °C.  $^1\text{H}$  NMR (500 MHz,  $\text{CDCl}_3$ )  $\delta$  5.34 (brs, 1H), 3.99 – 3.90 (m, 1H), 3.89 – 3.83 (m, 1H), 3.83 – 3.70 (m, 3H), 3.57 – 3.45 (m, 1H), 3.04 – 2.83 (m, 2H), 2.50 – 2.39 (m, 1H), 2.17 – 2.03 (m, 1H), 1.87 – 1.76 (m, 3H), 1.76 – 1.68 (m, 2H).  $^{13}\text{C}\{^1\text{H}\}$  NMR (100 MHz,  $\text{CDCl}_3$ )  $\delta$  156.6, 151.6, 126.7 (q,  $J = 276.6$  Hz), 71.2, 64.1, 64.0, 43.1, 40.4, 40.2, 36.6 (q,  $J = 2.9$  Hz), 35.9 (q,  $J = 29.0$  Hz), 27.5.  $^{19}\text{F}$  NMR (376 MHz,  $\text{CDCl}_3$ )  $\delta$  -64.61 (t,  $J = 10.8$  Hz). HRMS (ESI)  $m/z$ :  $[\text{M}+\text{H}]^+$  calcd for  $\text{C}_{12}\text{H}_{17}\text{F}_3\text{N}_3\text{O}_2$  292.1267; found: 292.1273.

**Spectral data for 8-methyl-2,2-diphenyl-8-(2,2,2-trifluoroethyl)-2,6,7,8-tetrahydropyrrolo[1,2-a][1,3,5]triazin-4(3H)-one (4m)**

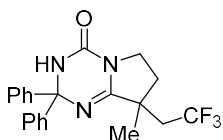

Purified by column chromatography (silica gel, EtOAc/Petroleum ether: 1/3) to afford the title compound (55% yield, 43 mg) as white solid, mp: 159-161 °C; and 12% yield of **7b**.  $^1\text{H}$  NMR (400 MHz,  $\text{CDCl}_3$ )  $\delta$  7.33 – 7.16 (m, 10H), 5.67 (brs, 1H), 3.74 – 3.64 (m, 1H), 3.56 – 3.43 (m, 1H), 2.76 – 2.58 (m, 1H), 2.34 – 2.17 (m, 1H), 2.07 – 1.86 (m, 2H), 1.27 (s, 3H).  $^{13}\text{C}\{^1\text{H}\}$  NMR (100 MHz,  $\text{CDCl}_3$ )  $\delta$  160.1, 150.1, 144.2, 143.9, 127.3, 127.2, 126.8, 126.7, 125.5 (q,  $J = 277.7$  Hz), 125.2, 125.1, 78.0, 41.0, 40.8, 40.2 (q,  $J = 27.7$  Hz), 31.6, 22.3.  $^{19}\text{F}$  NMR (376 MHz,  $\text{CDCl}_3$ )  $\delta$  -60.31 (t,  $J = 11.4$  Hz). HRMS (ESI)  $m/z$ :  $[\text{M}+\text{H}]^+$  calcd for  $\text{C}_{21}\text{H}_{21}\text{F}_3\text{N}_3\text{O}$  388.1631; found: 388.1648.

**Spectral data for 2,2,8-triphenyl-8-(2,2,2-trifluoroethyl)-2,6,7,8-tetrahydropyrrolo[1,2-a][1,3,5]triazin-4(3H)-one (4n)**

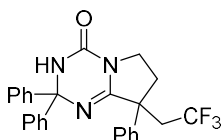

Purified by column chromatography (silica gel, EtOAc/Petroleum ether: 1/5) to afford the title compound (15% yield, 14 mg) as yellowish oil; and 10% yield of **7c**.  $^1\text{H}$  NMR (400 MHz,  $\text{CDCl}_3$ )  $\delta$  7.47 – 7.23 (m, 15H), 5.62 (brs, 1H), 3.90 – 3.79 (m, 1H), 3.41 – 3.30 (m, 1H), 3.18 – 3.01 (m, 1H), 2.92 – 2.66 (m, 2H), 2.33 – 2.17 (m, 1H).  $^{13}\text{C}\{^1\text{H}\}$  NMR (100 MHz,  $\text{CDCl}_3$ )  $\delta$  159.3, 151.0, 145.1, 144.9, 137.9, 128.9, 128.5, 128.1, 128.0, 127.6 (q,  $J = 277.9$  Hz), 126.6, 126.3, 79.7, 49.2 (q,  $J = 2.3$  Hz), 42.9 (q,  $J = 27.4$  Hz), 41.9, 31.3.  $^{19}\text{F}$  NMR (376 MHz,  $\text{CDCl}_3$ )  $\delta$  -60.20 (t,  $J = 11.0$  Hz). HRMS (ESI)  $m/z$ :  $[\text{M}+\text{H}]^+$  calcd for  $\text{C}_{26}\text{H}_{23}\text{F}_3\text{N}_3\text{O}$  450.1779; found: 450.1788.

**Spectral data for 2',2'-diphenyl-2-(trifluoromethyl)-2',3',6',7'-tetrahydro-4'H-spiro[cyclopentane-1,8'-pyrrolo[1,2-a][1,3,5]triazin]-4'-one (4o)**

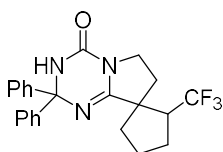

Purified by column chromatography (silica gel, EtOAc/Petroleum ether: 1/5) to afford the title compound (30% yield, 25 mg, dr > 19/1) as yellowish oil; and 11% yield of **7d** (dr > 19/1). <sup>1</sup>H NMR (400 MHz, CDCl<sub>3</sub>) δ 7.43 – 7.20 (m, 10H), 5.62 (brs, 1H), 3.85 – 3.73 (m, 1H), 3.59 – 3.46 (m, 1H), 3.37 – 3.23 (m, 1H), 2.33 – 2.15 (m, 2H), 2.02 – 1.70 (m, 6H). <sup>13</sup>C{<sup>1</sup>H} NMR (100 MHz, CDCl<sub>3</sub>) δ 161.1, 151.2, 145.4, 145.0, 128.4, 128.3, 128.0, 127.9, 127.5 (q, *J* = 278.9 Hz), 126.4, 126.3, 79.2, 52.7, 48.4 (q, *J* = 26.2 Hz), 42.4, 39.4, 29.4, 26.0 (q, *J* = 2.5 Hz), 22.9. <sup>19</sup>F NMR (376 MHz, CDCl<sub>3</sub>) δ -65.69 (d, *J* = 10.4 Hz). HRMS (ESI) *m/z*: [M+H]<sup>+</sup> calcd for C<sub>23</sub>H<sub>23</sub>F<sub>3</sub>N<sub>3</sub>O 414.1788; found: 414.1794.

**Spectral data for 2',2'-diphenyl-2-(trifluoromethyl)-2',3',6',7'-tetrahydro-4'H-spiro[cyclohexane-1,8'-pyrrolo[1,2-a][1,3,5]triazin]-4'-one (4p)**

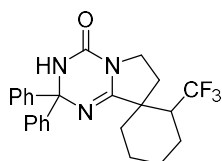

Purified by column chromatography (silica gel, EtOAc/Petroleum ether: 1/5) to afford the title compound (42% yield, 36 mg, dr > 19/1) as yellowish oil and 18% yield of **7e** (dr = 3.3/1). <sup>1</sup>H NMR (400 MHz, CDCl<sub>3</sub>) δ 7.42 – 7.37 (m, 2H), 7.36 – 7.26 (m, 8H), 5.52 (brs, 1H), 3.76 – 3.57 (m, 2H), 2.85 – 2.67 (m, 1H), 2.31 – 2.19 (m, 1H), 2.03 – 1.95 (m, 1H), 1.90 – 1.68 (m, 4H), 1.63 – 1.54 (m, 1H), 1.52 – 1.32 (m, 3H). <sup>13</sup>C{<sup>1</sup>H} NMR (100 MHz, CDCl<sub>3</sub>) δ 161.8, 151.3, 145.5, 145.0, 128.3, 128.2, 127.9, 127.8, 127.3 (q, *J* = 281.7 Hz), 126.7, 126.5, 79.3, 46.4 (q, *J* = 24.7 Hz), 46.3, 42.3, 37.8, 25.8, 24.4, 22.8 (q, *J* = 2.8 Hz), 21.8. <sup>19</sup>F NMR (376 MHz, CDCl<sub>3</sub>) δ -66.69 (d, *J* = 9.3 Hz). HRMS (ESI) *m/z*: [M+H]<sup>+</sup> calcd for C<sub>24</sub>H<sub>25</sub>F<sub>3</sub>N<sub>3</sub>O 428.1944; found: 428.1952.

**Spectral data for 3-methyl-2,2,6-triphenyl-8-(2,2,2-trifluoroethyl)-2,6,7,8-tetrahydropyrrolo[1,2-a][1,3,5]triazin-4(3H)-one (4q)**

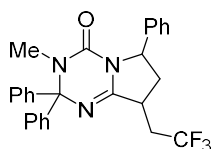

According to the general procedure, upon completion, the mixture was cooled to room temperature, diluted with EtOAc (10 mL), and filtered with a pad of silica gel, the filtrate was concentrated under reduced pressure. Then to a solution of residue in THF (0.8 mL) was added NaH (2.0 equiv) and MeI (1.2 equiv) at 0 °C. The resulting mixture was warmed to room temperature for 20 h. After completion, the solvent was evaporated and the residue was dissolved in EtOAc, washed with H<sub>2</sub>O and brine. The organic layer was dried over MgSO<sub>4</sub>, filtered, and concentrated under reduced pressure. The residue was purified by column chromatography (silica gel, EtOAc/Petroleum ether: 1/5) to afford the title compound (an inseparable mixture, 56% yield, 52 mg, dr = 1/1) as white solid. The mixture: <sup>1</sup>H NMR (500 MHz, CDCl<sub>3</sub>) δ 7.44 – 7.39 (m, 6H), 7.38 – 7.29 (m, 12H), 7.29 – 7.26 (m, 2H), 7.23 – 7.19 (m, 6H), 6.89 – 6.83 (m, 4H), 5.46 (dd, *J* = 7.9, 2.5 Hz, 1H), 5.04 (dd, *J* = 9.7, 6.8 Hz, 1H), 3.24 – 3.13 (m, 1H), 3.06 – 2.91 (m, 3H), 2.84 – 2.75 (m, 1H), 2.69 (s, 3H), 2.62 (s, 3H), 2.37 – 2.25 (m, 2H), 2.23 – 2.12 (m, 1H), 2.01 – 1.88 (m, 1H), 1.52 – 1.41 (m, 1H). <sup>13</sup>C{<sup>1</sup>H} NMR (125 MHz, CDCl<sub>3</sub>) δ 159.1, 157.9, 152.2, 151.4, 143.2, 142.9, 142.6, 142.3, 141.6, 140.9, 129.2, 128.9, 128.8, 128.5, 128.4, 128.2, 127.8, 127.6, 127.5, 127.2, 126.8 (q, *J* = 276.5 Hz), 125.5, 125.1, 84.1, 83.4, 60.4, 58.5, 38.4, 37.4, 36.0 (q, *J* = 28.3 Hz), 35.7, 35.5 (q, *J* = 29.1 Hz), 34.9, 32.0, 31.9. <sup>19</sup>F NMR (470 MHz, CDCl<sub>3</sub>) δ -64.57 (t, *J* = 11.0 Hz, 3F), -64.76 (t, *J* = 10.9 Hz, 3F). HRMS (ESI) *m/z*: [M+H]<sup>+</sup> calcd for C<sub>27</sub>H<sub>25</sub>F<sub>3</sub>N<sub>3</sub>O 464.1944; found: 464.1949.

**Spectral data for 7,7-dimethyl-2,2-diphenyl-8-(2,2,2-trifluoroethyl)-2,6,7,8-tetrahydropyrrolo [1,2-a][1,3,5]triazin-4(3H)-one (4r)**

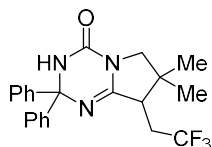

Purified by column chromatography (silica gel, EtOAc/Petroleum ether: 1/5) to afford the title compound (60% yield, 48 mg) as yellowish solid, mp: 174-176 °C. <sup>1</sup>H NMR (500 MHz, CDCl<sub>3</sub>) δ 7.42 – 7.36 (m, 4H), 7.34 – 7.23 (m, 6H), 6.02 (brs, 1H), 3.53 (d, *J* = 10.5 Hz, 1H), 3.26 (d, *J* = 10.5 Hz, 1H), 2.99 – 2.83 (m, 1H), 2.79 – 2.72 (m, 1H), 2.23 – 2.09 (m, 1H), 1.20 (s, 3H), 0.74 (s, 3H). <sup>13</sup>C{<sup>1</sup>H} NMR (125 MHz, CDCl<sub>3</sub>) δ 157.7, 151.4, 145.4, 145.2, 128.5, 128.3, 127.9, 127.8, 126.8 (q, *J* = 276.7 Hz), 126.4, 126.0, 79.1, 56.3, 46.4, 38.6, 30.2 (q, *J* = 30.0 Hz), 24.3, 21.2. <sup>19</sup>F NMR (470 MHz, CDCl<sub>3</sub>) δ -63.72 (t, *J* = 11.5 Hz). HRMS (ESI) *m/z*: [M+H]<sup>+</sup> calcd for C<sub>22</sub>H<sub>23</sub>F<sub>3</sub>N<sub>3</sub>O 402.1788; found: 402.1780.

**3. General procedure for preparation of products 6**

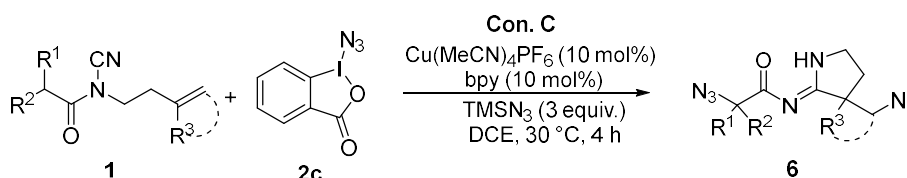

To a flame-dried sealed tube equipped with a magnetic stir bar were added **1** (0.2 mmol, 1 equiv.), **2c** (0.4 mmol, 2.0 equiv.), Cu(MeCN)<sub>4</sub>PF<sub>6</sub> (10 mol%), bpy (10 mol%, 0.02 mmol). The tube was evacuated and backfilled with nitrogen for three times. Then DCE (2.0 mL) and TMSN<sub>3</sub> (0.6 mmol, 3 equiv.) were added *via* syringe. The tube was stirred at 30 °C for 4 h. After completion, the mixture was cooled to room temperature, diluted with EtOAc (10 mL), and filtered with a pad of silica gel, the filtrate was concentrated under reduced pressure. The residue was then purified by flash column chromatography to give the triazoles **6**.

**Spectral data for (Z)-2-azido-N-(3-(azidomethyl)pyrrolidin-2-ylidene)-2,2-diphenylacetamide (6a)**

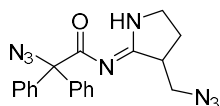

Purified by column chromatography (silica gel, EtOAc/Petroleum ether: 1/5) to afford the title compound (49% yield, 37 mg) as white solid, mp: 135-137 °C. <sup>1</sup>H NMR (500 MHz, CDCl<sub>3</sub>) δ 10.01 (s, 1H), 7.43 – 7.26 (m, 10H), 3.73 – 3.62 (m, 2H), 3.62 – 3.53 (m, 2H), 3.08 – 2.87 (m, 1H), 2.30 – 2.15 (m, 1H), 2.05 – 1.91 (m, 1H). <sup>13</sup>C{<sup>1</sup>H} NMR (125 MHz, CDCl<sub>3</sub>) δ 184.9, 174.8, 140.9, 140.8, 128.6, 128.5, 128.1, 128.0, 127.9, 78.8, 52.0, 45.8, 44.9, 23.3. HRMS (ESI) *m/z*: [M+H]<sup>+</sup> calcd for C<sub>19</sub>H<sub>19</sub>N<sub>8</sub>O 375.1676; found: 375.1680.

**Spectral data for (Z)-2-azido-N-(3-(azidomethyl)-3-methylpyrrolidin-2-ylidene)-2,2-diphenylacetamide (6b)**

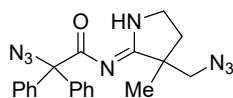

Purified by column chromatography (silica gel, EtOAc/Petroleum ether: 1/5) to afford the title compound (68% yield, 53 mg) as white solid, mp: 139-141 °C. <sup>1</sup>H NMR (400 MHz, CDCl<sub>3</sub>) δ 9.89 (s, 1H), 7.40 – 7.26 (m, 10H), 3.68 – 3.55 (m, 2H), 3.62 (d, *J* = 11.9 Hz, 1H), 3.25 (d, *J* = 11.9 Hz, 1H), 2.29 – 2.16 (m, 1H), 1.86 – 1.75 (m, 1H),

1.15 (s, 3H).  $^{13}\text{C}\{\text{H}^1\}$  NMR (125 MHz,  $\text{CDCl}_3$ )  $\delta$  185.4, 177.8, 141.1, 141.0, 128.6, 128.5, 128.0, 127.8, 78.9, 58.0, 48.7, 44.4, 30.1, 22.3. HRMS (ESI)  $m/z$ :  $[\text{M}+\text{H}]^+$  calcd for  $\text{C}_{20}\text{H}_{21}\text{N}_8\text{O}$  389.1833; found: 389.1824.

**Spectral data for (Z)-2-azido-N-(3-(azidomethyl)-3-phenylpyrrolidin-2-ylidene)-2,2-diphenylacetamide (6c)**

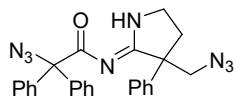

Purified by column chromatography (silica gel, EtOAc/Petroleum ether: 1/5) to afford the title compound (25% yield, 23 mg) as yellowish oil.  $^1\text{H}$  NMR (500 MHz,  $\text{CDCl}_3$ )  $\delta$  10.06 (s, 1H), 7.44 – 7.40 (m, 2H), 7.39 – 7.29 (m, 8H), 7.29 – 7.20 (m, 5H), 3.90 (d,  $J$  = 12.0 Hz, 1H), 3.68 – 3.62 (m, 1H), 3.56 (d,  $J$  = 12.1 Hz, 1H), 3.54 – 3.47 (m, 1H), 2.59 – 2.45 (m, 2H).  $^{13}\text{C}\{\text{H}^1\}$  NMR (125 MHz,  $\text{CDCl}_3$ )  $\delta$  185.0, 175.5, 140.8, 140.5, 138.3, 128.9, 128.7, 128.2, 128.1, 128.0, 127.8, 126.7, 79.2, 57.9, 56.0, 44.3, 30.0. HRMS (ESI)  $m/z$ :  $[\text{M}+\text{H}]^+$  calcd for  $\text{C}_{25}\text{H}_{23}\text{N}_8\text{O}$  451.1989; found: 451.1993.

**Spectral data for (Z)-2-azido-N-(6-azido-2-azaspiro[4.4]nonan-1-ylidene)-2,2-diphenylacetamide (6d)**

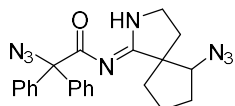

Purified by column chromatography (silica gel, EtOAc/Petroleum ether: 1/5) to afford the title compound (67% yield, dr > 19/1, 56 mg) as white solid, mp: 141-143 °C.  $^1\text{H}$  NMR (500 MHz,  $\text{CDCl}_3$ )  $\delta$  9.97 (s, 1H), 7.41 – 7.26 (m, 10H), 4.10 (dd,  $J$  = 9.3, 7.7 Hz, 1H), 3.69 – 3.61 (m, 1H), 3.59 – 3.51 (m, 1H), 2.39 – 2.28 (m, 1H), 2.19 – 2.06 (m, 1H), 2.01 – 1.88 (m, 1H), 1.78 – 1.68 (m, 3H), 1.67 – 1.56 (m, 2H).  $^{13}\text{C}\{\text{H}^1\}$  NMR (125 MHz,  $\text{CDCl}_3$ )  $\delta$  185.2, 178.1, 141.1, 140.9, 128.6, 128.5, 128.0, 127.8, 79.0, 67.6, 57.8, 44.8, 35.5, 30.1, 27.8, 20.8. HRMS (ESI)  $m/z$ :  $[\text{M}+\text{H}]^+$  calcd for  $\text{C}_{22}\text{H}_{23}\text{N}_8\text{O}$  415.1989; found: 415.1998.

**Spectral data for (Z)-2-azido-N-(6-azido-2-azaspiro[4.5]decan-1-ylidene)-2,2-diphenylacetamide (6e)**

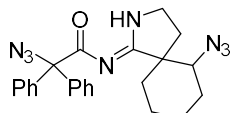

Purified by column chromatography (silica gel, EtOAc/Petroleum ether: 1/5) to afford the title compound (71% yield, dr > 19/1, 61 mg) as white solid, mp: 179-181 °C.  $^1\text{H}$  NMR (400 MHz,  $\text{CDCl}_3$ )  $\delta$  9.94 (s, 1H), 7.41 – 7.25 (m, 10H), 3.86 – 3.76 (m, 1H), 3.67 – 3.47 (m, 2H), 2.22 – 2.08 (m, 1H), 2.02 – 1.89 (m, 1H), 1.85 – 1.72 (m, 2H), 1.67 – 1.57 (m, 2H), 1.55 – 1.43 (m, 1H), 1.40 – 1.10 (m, 3H).  $^{13}\text{C}\{\text{H}^1\}$  NMR (100 MHz,  $\text{CDCl}_3$ )  $\delta$  185.4, 178.3, 141.2, 141.0, 128.6, 128.5, 128.1, 128.0, 127.8, 127.7, 78.9, 64.3, 53.3, 44.9, 33.6, 28.1, 24.7, 24.2, 21.3. HRMS (ESI)  $m/z$ :  $[\text{M}+\text{H}]^+$  calcd for  $\text{C}_{23}\text{H}_{25}\text{N}_8\text{O}$  429.2146; found: 429.2129.

**Spectral data for (Z)-2-azido-N-(3-(azidomethyl)-3-methylpyrrolidin-2-ylidene)-2-methylpropanamide (6f)**

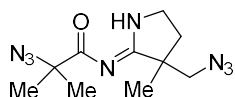

Purified by column chromatography (silica gel, EtOAc/Petroleum ether: 1/5) to afford the title compound (57% yield, 30 mg) as colorless oil.  $^1\text{H}$  NMR (500 MHz,  $\text{CDCl}_3$ )  $\delta$  9.93 (s, 1H), 3.86 – 3.70 (m, 1H), 3.70 – 3.56 (m, 2H), 3.30 (d,  $J$  = 12.0 Hz, 1H), 2.33 – 2.16 (m, 1H), 1.88 – 1.78 (m, 1H), 1.47 (s, 3H), 1.45 (s, 3H), 1.24 (s, 3H).  $^{13}\text{C}\{\text{H}^1\}$  NMR (125 MHz,  $\text{CDCl}_3$ )  $\delta$  188.3, 177.8, 65.9, 57.9, 48.8, 44.2, 30.1, 24.9, 24.8, 22.3. HRMS (ESI)  $m/z$ :  $[\text{M}+\text{H}]^+$



calcd for C<sub>10</sub>H<sub>17</sub>N<sub>8</sub>O 265.1520; found: 265.1525.

**Spectral data for (Z)-1-azido-N-(3-(azidomethyl)-3-methylpyrrolidin-2-ylidene)cyclobutane-1-carboxamide (6g)**

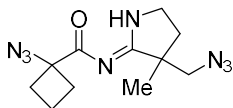

Purified by column chromatography (silica gel, EtOAc/Petroleum ether: 1/5) to afford the title compound (45% yield, 25 mg) as yellowish oil. <sup>1</sup>H NMR (500 MHz, CDCl<sub>3</sub>) δ 9.95 (s, 1H), 3.76 (d, *J* = 12.0 Hz, 1H), 3.71 – 3.58 (m, 2H), 3.31 (d, *J* = 12.0 Hz, 1H), 2.68 – 2.55 (m, 2H), 2.32 – 2.15 (m, 3H), 2.08 – 1.90 (m, 2H), 1.88 – 1.78 (m, 1H), 1.24 (s, 3H). <sup>13</sup>C{<sup>1</sup>H} NMR (125 MHz, CDCl<sub>3</sub>) δ 187.1, 177.6, 68.1, 57.9, 48.9, 44.3, 31.5, 31.2, 30.2, 22.3, 14.7. HRMS (ESI) *m/z*: [M+H]<sup>+</sup> calcd for C<sub>11</sub>H<sub>17</sub>N<sub>8</sub>O 277.1520; found: 277.1508.

**Spectral data for (Z)-4-azido-N-(3-(azidomethyl)-3-methylpyrrolidin-2-ylidene) tetrahydro-2H-pyran-4-carboxamide (6h)**

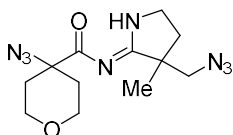

Purified by column chromatography (silica gel, EtOAc/Petroleum ether: 1/5) to afford the title compound (52% yield, 32 mg) as white solid, mp: 97-99 °C. <sup>1</sup>H NMR (500 MHz, CDCl<sub>3</sub>) δ 9.95 (s, 1H), 3.84 – 3.77 (m, 2H), 3.77 – 3.70 (m, 3H), 3.70 – 3.59 (m, 2H), 3.29 (d, *J* = 12.0 Hz, 1H), 2.29 – 2.23 (m, 1H), 2.23 – 2.14 (m, 2H), 1.87 – 1.80 (m, 1H), 1.79 – 1.67 (m, 2H), 1.23 (s, 3H). <sup>13</sup>C{<sup>1</sup>H} NMR (125 MHz, CDCl<sub>3</sub>) δ 186.4, 178.2, 65.9, 64.1, 64.0, 58.0, 48.8, 44.3, 32.4, 32.3, 30.1, 22.4. HRMS (ESI) *m/z*: [M+H]<sup>+</sup> calcd for C<sub>12</sub>H<sub>19</sub>N<sub>8</sub>O<sub>2</sub> 307.1625; found: 307.1632.

**4. General procedure for preparation of products 7**

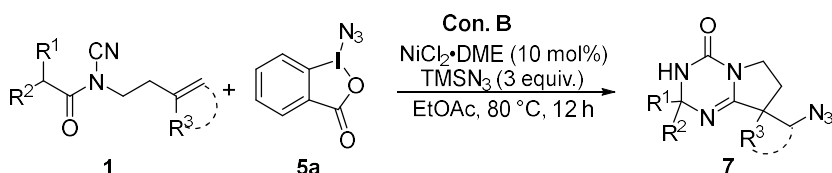

The general procedure is the same as that of preparation 4 (Con. B).

**Spectral data for 8-(azidomethyl)-8-methyl-2,2-diphenyl-2,6,7,8-tetrahydropyrrolo[1,2-a][1,3,5]triazin-4(3H)-one (7b)**

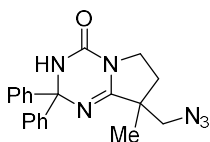

Purified by column chromatography (silica gel, EtOAc/Petroleum ether: 1/3) to afford the title compound (65% yield, 47 mg) as yellowish solid, mp: 158-160 °C. <sup>1</sup>H NMR (400 MHz, CDCl<sub>3</sub>) δ 7.41 – 7.35 (m, 4H), 7.35 – 7.22 (m, 6H), 5.90 (brs, 1H), 3.76 – 3.67 (m, 1H), 3.64 – 3.53 (m, 1H), 3.61 (d, *J* = 12.0 Hz, 1H), 3.45 (d, *J* = 12.0 Hz, 1H), 2.17 – 2.03 (m, 1H), 1.84 – 1.67 (m, 1H), 1.26 (s, 3H). <sup>13</sup>C{<sup>1</sup>H} NMR (100 MHz, CDCl<sub>3</sub>) δ 160.3, 151.2, 145.5, 145.2, 128.4, 128.3, 127.9, 126.4, 126.3, 79.2, 58.3, 46.2, 41.9, 30.8, 22.4. HRMS (ESI) *m/z*: [M+H]<sup>+</sup> calcd

for C<sub>20</sub>H<sub>21</sub>N<sub>6</sub>O 361.1771; found: 361.1779.

**Spectral data for 8-(azidomethyl)-2,2,8-triphenyl-2,6,7,8-tetrahydropyrrolo[1,2-a][1,3,5]triazine -4(3H)-one (7c)**

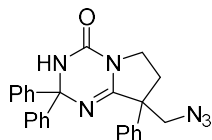

Purified by column chromatography (silica gel, EtOAc/Petroleum ether: 1/5) to afford the title compound (36% yield, 31 mg) as yellowish solid, mp: 179-181 °C. <sup>1</sup>H NMR (400 MHz, CDCl<sub>3</sub>) δ 7.56 – 7.21 (m, 15H), 5.91 (brs, 1H), 3.95 (d, *J* = 12.3 Hz, 1H), 3.87 – 3.76 (m, 1H), 3.81 (d, *J* = 12.4 Hz, 1H), 3.41 – 3.27 (m, 1H), 2.48 – 2.31 (m, 2H). <sup>13</sup>C{<sup>1</sup>H} NMR (100 MHz, CDCl<sub>3</sub>) δ 158.4, 151.1, 145.1, 145.0, 138.8, 128.9, 128.5, 128.4, 128.0, 127.9, 126.7, 126.6, 126.5, 79.6, 58.1, 54.0, 41.7, 30.7. HRMS (ESI) *m/z*: [M+H]<sup>+</sup> calcd for C<sub>25</sub>H<sub>23</sub>N<sub>6</sub>O 423.1936; found: 423.1928.

**Spectral data for 2-azido-2',2'-diphenyl-2',3',6',7'-tetrahydro-4'H-spiro[cyclopentane-1,8'- pyrrolo [1,2-a][1,3,5]triazin]-4'-one (7d)**

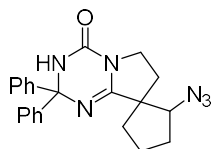

Purified by column chromatography (silica gel, EtOAc/Petroleum ether: 1/5) to afford the title compound (50% yield, 39 mg, dr > 19/1) as white solid, mp: 183-185 °C. <sup>1</sup>H NMR (500 MHz, CDCl<sub>3</sub>) δ 7.39 – 7.34 (m, 4H), 7.34 – 7.29 (m, 4H), 7.28 – 7.23 (m, 2H), 5.80 (brs, 1H), 4.19 (t, *J* = 7.6 Hz, 1H), 3.77 – 3.69 (m, 1H), 3.60 – 3.52 (m, 1H), 2.35 – 2.28 (m, 1H), 2.28 – 2.20 (m, 1H), 2.06 – 1.98 (m, 1H), 1.94 – 1.80 (m, 2H), 1.80 – 1.67 (m, 3H). <sup>13</sup>C{<sup>1</sup>H} NMR (125 MHz, CDCl<sub>3</sub>) δ 160.7, 151.2, 145.5, 145.3, 128.4, 127.9, 126.4, 126.3, 79.1, 67.9, 55.6, 42.5, 35.7, 30.2, 28.0, 20.9. HRMS (ESI) *m/z*: [M+H]<sup>+</sup> calcd for C<sub>22</sub>H<sub>23</sub>N<sub>6</sub>O 387.1928; found: 387.1939.

**Spectral data for 2-azido-2',2'-diphenyl-2',3',6',7'-tetrahydro-4'H-spiro[cyclohexane-1,8'-pyrrolo [1,2-a][1,3,5]triazin]-4'-one (7e)**

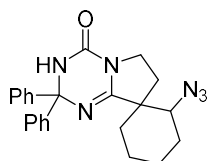

Purified by column chromatography (silica gel, EtOAc/Petroleum ether: 1/5) to afford the title compound (an inseparable mixture, 52% yield, 42 mg, dr = 3.1/1) as yellowish solid. The major isomer: <sup>1</sup>H NMR (500 MHz, CDCl<sub>3</sub>) δ 7.44 – 7.36 (m, 4H), 7.35 – 7.29 (m, 4H), 7.29 – 7.22 (m, 2H), 5.84 (brs, 1H), 3.97 – 3.89 (m, 1H), 3.78 – 3.66 (m, 1H), 3.60 – 3.50 (m, 1H), 2.21 – 2.02 (m, 2H), 1.99 – 1.87 (m, 1H), 1.86 – 1.74 (m, 2H), 1.74 – 1.59 (m, 3H), 1.51 – 1.35 (m, 2H). The minor isomer: <sup>1</sup>H NMR (500 MHz, CDCl<sub>3</sub>) δ 7.44 – 7.36 (m, 4H), 7.35 – 7.29 (m, 4H), 7.29 – 7.22 (m, 2H), 5.83 (brs, 1H), 3.78 – 3.66 (m, 1H), 3.60 – 3.50 (m, 1H), 3.44 – 3.36 (m, 1H), 2.68 – 2.58 (m, 1H), 2.21 – 2.02 (m, 2H), 1.99 – 1.87 (m, 1H), 1.86 – 1.74 (m, 2H), 1.74 – 1.59 (m, 3H), 1.51 – 1.35 (m, 1H). The mixture: <sup>13</sup>C{<sup>1</sup>H} NMR (125 MHz, CDCl<sub>3</sub>) δ 161.3, 158.6, 151.6, 151.3, 145.6, 145.5, 145.3, 128.3, 127.9, 127.7, 126.5, 126.3, 79.2, 66.1, 65.2, 50.4, 48.2, 42.5, 42.0, 35.4, 34.3, 33.8, 28.3, 26.3, 24.9, 24.5, 24.2, 21.3, 20.7. The major isomer: HRMS (ESI) *m/z*: [M+H]<sup>+</sup> calcd for C<sub>23</sub>H<sub>25</sub>N<sub>6</sub>O 401.2084; found: 401.2095. The minor isomer: HRMS (ESI) *m/z*: [M+H]<sup>+</sup> calcd for C<sub>23</sub>H<sub>25</sub>N<sub>6</sub>O 401.2084; found: 401.2092.

**Spectral data for 2-azido-2',2'-diphenyl-2',3',6',7'-tetrahydro-4'H-spiro[cyclohexane-1,8'-pyrrolo[1,2-a][1,3,5]triazin]-4'-one (7e-major)**

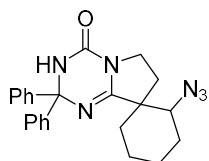

$^1\text{H}$  NMR (400 MHz,  $\text{CDCl}_3$ )  $\delta$  7.41 – 7.36 (m, 4H), 7.36 – 7.30 (m, 4H), 7.30 – 7.27 (m, 2H), 5.61 (brs, 1H), 3.97 – 3.89 (m, 1H), 3.77 – 3.69 (m, 1H), 3.62 – 3.52 (m, 1H), 2.17 – 2.01 (m, 2H), 1.86 – 1.74 (m, 2H), 1.74 – 1.60 (m, 4H), 1.48 – 1.39 (m, 2H).  $^{13}\text{C}\{\text{H}^1\}$  NMR (125 MHz,  $\text{CDCl}_3$ )  $\delta$  161.4, 151.1, 145.6, 145.3, 128.4, 127.9, 126.5, 79.3, 65.2, 50.4, 42.5, 34.3, 28.3, 25.0, 24.3, 21.4. HRMS (ESI)  $m/z$ :  $[\text{M}+\text{H}]^+$  calcd for  $\text{C}_{23}\text{H}_{25}\text{N}_6\text{O}$  401.2084; found: 401.2099.

**Spectral data for 2,2,8- trimethyl- 8-((4-phenyl-1H-1,2,3-triazol-1-yl) methyl) -2,6,7,8- tetrahydropyrrolo [1,2-a][1,3,5]triazin-4(3H)-one (7f)**

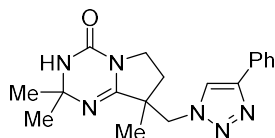

According to the general procedure, upon completion, the mixture was cooled to room temperature, diluted with EtOAc (10 mL), and filtered with a pad of silica gel, the filtrate was concentrated under reduced pressure. Then the residue and CuI (20 mol%, 0.04 mmol) were added in a 25 mL oven-dried sealed tube. The tube was evacuated and backfilled with  $\text{N}_2$  for three times, after that, phenylacetylene (0.6 mmol, 3.0 equiv.) and THF (2.0 mL) were then added via syringe under  $\text{N}_2$ . The tube was sealed with a Teflon lined cap and moved into a preheated oil bath at 60  $^\circ\text{C}$  for 24 h. The reaction mixture was then cooled to room temperature, diluted with EtOAc (10 mL) and filtered through a pad of Celite. The filtrate was concentrated, and the residue was then purified by column chromatography (silica gel, EtOAc/Petroleum ether: 5/1) to afford the title compound (46% yield, 31 mg) as yellowish solid, mp: 219-221  $^\circ\text{C}$ .  $^1\text{H}$  NMR (500 MHz,  $\text{CDCl}_3$ )  $\delta$  7.91 (s, 1H), 7.80 (d,  $J = 7.2$  Hz, 2H), 7.43 (t,  $J = 7.6$  Hz, 2H), 7.34 (t,  $J = 7.4$  Hz, 1H), 5.59 (brs, 1H), 4.65 (d,  $J = 14.1$  Hz, 1H), 4.57 (d,  $J = 14.0$  Hz, 1H), 3.54 (dd,  $J = 8.8, 5.2$  Hz, 2H), 2.22 – 2.12 (m, 1H), 1.93 – 1.85 (m, 1H), 1.49 (s, 3H), 1.48 (s, 3H), 1.33 (s, 3H).  $^{13}\text{C}\{\text{H}^1\}$  NMR (125 MHz,  $\text{CDCl}_3$ )  $\delta$  159.1, 151.6, 130.5, 129.0, 128.4, 125.7, 121.4, 72.4, 55.4, 46.1, 41.3, 31.1, 30.9, 30.3, 22.9. HRMS (ESI)  $m/z$ :  $[\text{M}+\text{H}]^+$  calcd for  $\text{C}_{18}\text{H}_{23}\text{N}_6\text{O}$  339.1928; found: 339.1936.

**Spectral data for 8' -(azidomethyl) -8'- methyl- 7',8'- dihydro -6'H- spiro [cyclobutane-1,2'-pyrrolo[1,2-a][1,3,5]triazin]-4'(3'H)-one (7g)**

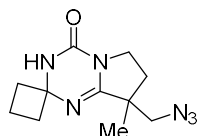

Purified by column chromatography (silica gel, EtOAc/Petroleum ether: 2/1) to afford the title compound (61% yield, 30 mg) as yellowish oil.  $^1\text{H}$  NMR (500 MHz,  $\text{CDCl}_3$ )  $\delta$  6.23 (brs, 1H), 3.75 – 3.68 (m, 1H), 3.63 (d,  $J = 12.1$  Hz, 1H), 3.60 – 3.51 (m, 1H), 3.31 (d,  $J = 12.2$  Hz, 1H), 2.41 – 2.28 (m, 2H), 2.28 – 2.19 (m, 2H), 2.19 – 2.11 (m, 1H), 2.04 – 1.90 (m, 1H), 1.82 – 1.68 (m, 2H), 1.23 (s, 3H).  $^{13}\text{C}\{\text{H}^1\}$  NMR (125 MHz,  $\text{CDCl}_3$ )  $\delta$  159.1, 151.8, 75.0,

57.8, 46.0, 41.4, 40.5, 40.1, 30.7, 22.3, 12.8. HRMS (ESI)  $m/z$ :  $[M+H]^+$  calcd for  $C_{11}H_{17}N_6O$  249.1458; found: 249.1448.

**Spectral data for 8'-(azidomethyl)-8'-methyl-2,3,5,6,7',8'-hexahydro-6'H-spiro [pyran-4,2'-pyrrolo[1,2-a][1,3,5]triazin]-4'(3'H)-one (7h)**

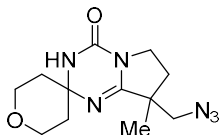

Purified by column chromatography (silica gel, EtOAc/Petroleum ether: 2/1) to afford the title compound (54% yield, 31 mg) as white solid, mp: 183-185 °C.  $^1H$  NMR (400 MHz,  $CDCl_3$ )  $\delta$  5.92 (brs, 1H), 3.97 – 3.83 (m, 2H), 3.82 – 3.71 (m, 3H), 3.66 – 3.53 (m, 2H), 3.31 (d,  $J$  = 12.1 Hz, 1H), 2.25 – 2.11 (m, 1H), 1.93 – 1.68 (m, 5H), 1.22 (s, 3H).  $^{13}C$  { $^1H$ } NMR (125 MHz,  $CDCl_3$ )  $\delta$  159.4, 151.9, 71.2, 64.1, 64.0, 58.0, 46.1, 41.6, 40.4, 40.1, 30.6, 22.6. HRMS (ESI)  $m/z$ :  $[M+H]^+$  calcd for  $C_{12}H_{19}N_6O_2$  279.1564; found: 279.1556.

## V. Scale-up Reaction and Synthetic Transformations

### 1. Scale-up Reaction

#### 1) Scale-up reaction for preparation of product 3a

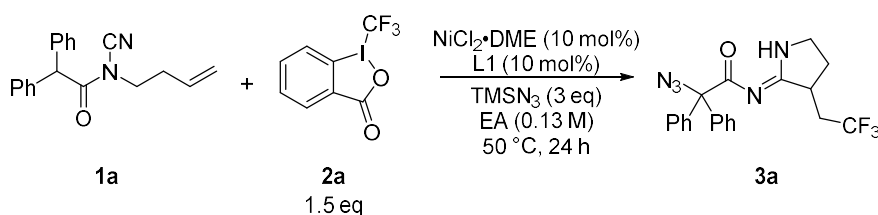

To a flame-dried sealed tube equipped with a magnetic stir bar were added **1a** (2 mmol, 1 equiv.), Togni's reagent **2a** (3 mmol, 1.5 equiv.),  $NiCl_2 \cdot DME$  (10 mol%, 0.2 mmol) and **L1** (10 mol%, 0.2 mmol). The tube was evacuated and backfilled with nitrogen for three times. Then ethyl acetate (15 mL) and  $TMSN_3$  (6 mmol, 3 equiv.) were added *via* syringe. The tube was stirred at 50 °C for 24 h. After completion, the mixture was cooled to room temperature, and sat. aq. soln. of  $NaHCO_3$  was added. Then the aqueous phase was extracted with DCM, washed with brine, dried over  $Na_2SO_4$ . The filtrate was concentrated under reduced pressure and the crude was purified by flash chromatography (silica gel, EtOAc/Petroleum ether (60-90 °C)) to give the desired compounds **3a** (442 mg, 55%).

#### 2) Scale-up reaction for preparation of product 4a

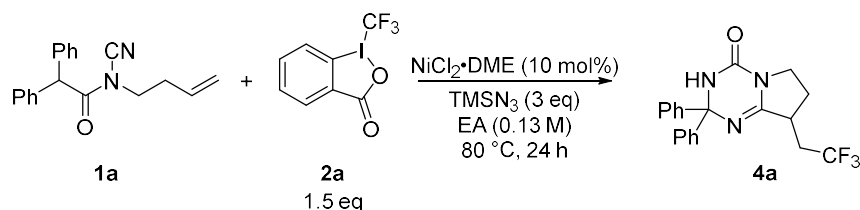

To a flame-dried sealed tube equipped with a magnetic stir bar were added **1a** (2 mmol, 1 equiv.), Togni's reagent **2a** (3 mmol, 1.5 equiv.) and  $NiCl_2 \cdot DME$  (10 mol%, 0.2 mmol). The tube was evacuated and backfilled with nitrogen for three times. Then ethyl acetate (15 mL) and  $TMSN_3$  (6 mmol, 3 equiv.) were added *via* syringe. The tube was stirred at 80 °C for 24 h. After completion, the mixture was cooled to room temperature, and sat. aq. soln. of  $NaHCO_3$  was added. Then the aqueous phase was extracted with DCM, washed with brine, dried over  $Na_2SO_4$ .

The filtrate was concentrated under reduced pressure and the crude was purified by flash chromatography (silica gel, EtOAc/Petroleum ether (60-90 °C)) to give the desired compounds **4a** (456 mg, 61%).

## 2. Synthetic Transformations

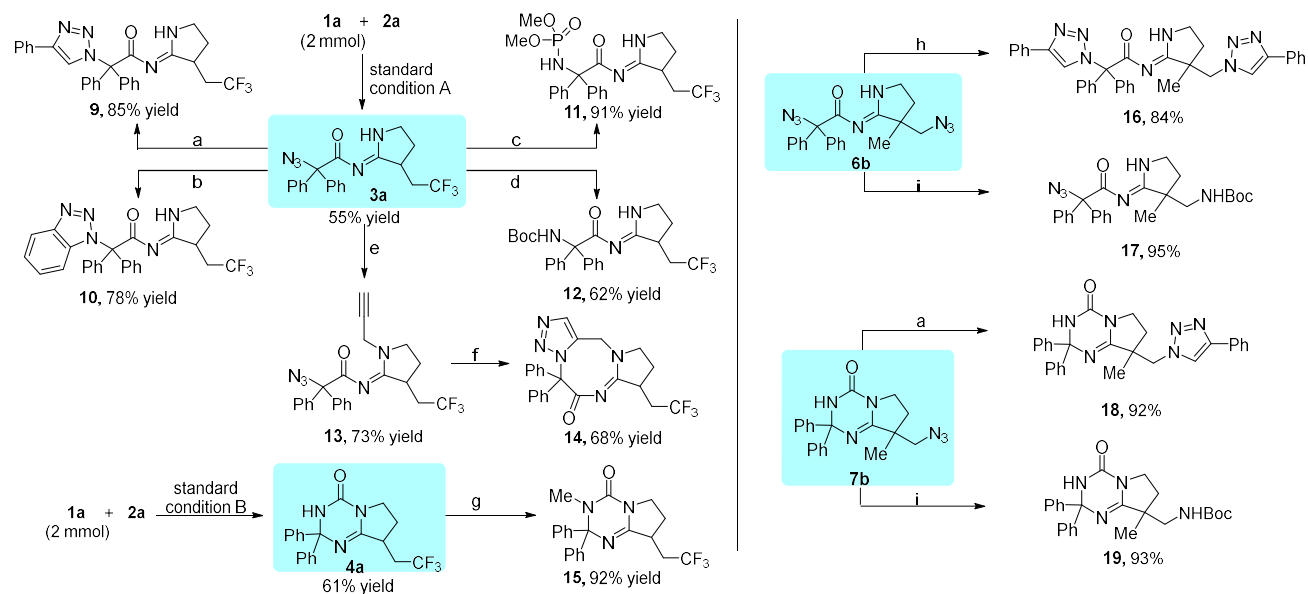

a) Reaction conditions: a) CuI (20 mol %), phenylacetylene (3 equiv.), THF (0.1 M), 60 °C, 24 h. b) CsF (2 equiv.), MeCN (0.1 M), 70 °C, 24 h. c) P(OMe)<sub>3</sub> (1.5 equiv.), toluene (0.2 M), 80 °C, 12 h. d) P(Me)<sub>3</sub> (2 equiv.), THF/H<sub>2</sub>O = 4/1 (0.05 M), rt, 4 h, then, Boc<sub>2</sub>O (1.2 equiv.), Et<sub>3</sub>N (1.2 equiv.), DCM (0.2 M), 0 °C to rt, overnight. e) K<sub>2</sub>CO<sub>3</sub> (2 equiv.), 3-Bromopropyne (1.1 equiv.), MeCN (0.25 M), 60 °C, 24 h. f) CuI (20 mol %), THF (0.1 M), 60 °C, 24 h. g) NaH (1.2 equiv.), MeI (1.2 equiv.), THF (0.2 M), 0 °C to rt, 20 h. h) CuI (20 mol%), phenylacetylene (6 equiv.), THF (0.1 M), 60 °C, 24 h. i) PPh<sub>3</sub> (2 equiv.), THF/H<sub>2</sub>O = 50/1 (0.1 M), rt, 4 h, then, Boc<sub>2</sub>O (1.2 equiv.), Et<sub>3</sub>N (1.2 equiv.), DCM (0.2 M), 0 °C to rt, overnight.

### Preparation of product **9**<sup>2</sup>

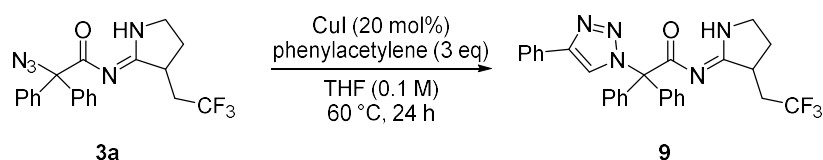

CuI (0.02 mmol, 20 mol%) and **3a** (0.1 mmol, 1 equiv.) were added in an oven-dried sealed tube. The vessel was evacuated and backfilled with N<sub>2</sub> (repeated for 3 times), after that, phenylacetylene (0.3 mmol, 3.0 equiv.) and THF (1.0 mL) were then added via syringe under N<sub>2</sub>. The tube was sealed with a Teflon lined cap and moved into a preheated oil bath at 60 °C for 24 h. The reaction mixture was then cooled to room temperature, diluted with EtOAc (10 mL) and filtered through a pad of celite. The filtrate was concentrated, and the residue was then purified by flash column chromatography to afford the corresponding product.

### Spectral data for (Z)-2,2-diphenyl-2-(4-phenyl-1H-1,2,3-triazol-1-yl)-N-(3-(2,2,2-trifluoroethyl)pyrrolidin-2-ylidene)acetamide (**9**)

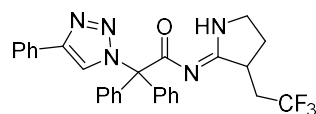

Purified by column chromatography (silica gel, EtOAc/Petroleum ether: 1/2) to afford the title compound (85% yield, 43 mg) as yellowish solid, (mp: 135-137 °C). <sup>1</sup>H NMR (400 MHz, CDCl<sub>3</sub>) δ 9.81 (s, 1H), 7.83 (s, 1H), 7.80 (d, *J* = 7.7 Hz, 2H), 7.42 – 7.27 (m, 13H), 3.71 – 3.53 (m, 2H), 3.04 – 2.90 (m, 1H), 2.67 – 2.50 (m, 1H), 2.45 –

2.32 (m, 1H), 1.95 – 1.74 (m, 2H).  $^{13}\text{C}\{\text{H}^1\}$  NMR (125 MHz,  $\text{CDCl}_3$ )  $\delta$  182.4, 174.5, 145.8, 140.1, 140.0, 131.0, 129.8, 129.7, 128.8, 128.5, 128.4, 128.0, 126.7 (q,  $J = 276.2$  Hz), 125.8, 123.1, 80.5, 45.6, 39.4, 35.5 (q,  $J = 28.9$  Hz), 27.0.  $^{19}\text{F}$  NMR (470 MHz,  $\text{CDCl}_3$ )  $\delta$  -64.72 (t,  $J = 11.1$  Hz). HRMS (ESI)  $m/z$ :  $[\text{M}+\text{H}]^+$  calcd for  $\text{C}_{28}\text{H}_{25}\text{F}_3\text{N}_5\text{O}$  504.2006; found: 504.2014.

### Preparation of product 10<sup>3</sup>

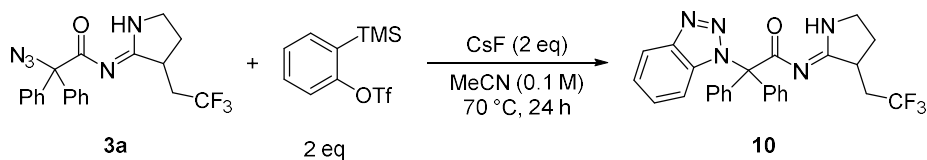

To a stirred solution of 2-(trimethylsilyl)phenyl trifluoromethanesulfonate (0.2 mmol, 2.0 equiv.) in  $\text{CH}_3\text{CN}$  (1 mL) were added **3a** (0.1 mmol, 1.0 equiv.) and CsF (0.2 mmol, 2.0 equiv.). The mixture was stirred at 70 °C for 24 h. After completion, the reaction mixture was diluted with DCM and washed with brine. The combined organic layers were dried over  $\text{Na}_2\text{SO}_4$ , filtered, and concentrated under reduced pressure. The residue was purified by flash chromatography on silica gel to afford the corresponding product.

### Spectral data for (Z)-2-(1H-benzo[d][1,2,3]triazol-1-yl)-2,2-diphenyl-N-(3-(2,2,2-trifluoroethyl)pyrrolidin-2-ylidene)acetamide (10)

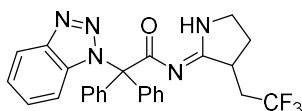

Purified by column chromatography (silica gel, EtOAc/Petroleum ether: 1/3) to afford the title compound (78% yield, 37 mg) as yellowish solid, (mp: 131-134 °C).  $^1\text{H}$  NMR (500 MHz,  $\text{CDCl}_3$ )  $\delta$  9.84 (s, 1H), 8.04 (d,  $J = 8.4$  Hz, 1H), 7.42 – 7.28 (m, 10H), 7.23 (t,  $J = 7.9$  Hz, 1H), 7.14 (t,  $J = 7.6$  Hz, 1H), 6.61 (d,  $J = 8.4$  Hz, 1H), 3.59 – 3.43 (m, 2H), 2.85 – 2.72 (m, 1H), 2.35 – 2.24 (m, 1H), 2.13 – 1.98 (m, 1H), 1.76 – 1.64 (m, 1H), 1.58 – 1.43 (m, 1H).  $^{13}\text{C}\{\text{H}^1\}$  NMR (100 MHz,  $\text{CDCl}_3$ )  $\delta$  182.8, 174.5, 146.4, 139.2, 138.8, 135.0, 130.2, 129.9, 128.4, 128.3, 128.0, 127.9, 126.5 (q,  $J = 277.6$  Hz), 126.2, 123.3, 119.9, 113.8, 80.3, 45.5, 39.3 (q,  $J = 2.9$  Hz), 35.0 (q,  $J = 28.9$  Hz), 26.9.  $^{19}\text{F}$  NMR (470 MHz,  $\text{CDCl}_3$ )  $\delta$  -64.84 (t,  $J = 10.9$  Hz). HRMS (ESI)  $m/z$ :  $[\text{M}+\text{H}]^+$  calcd for  $\text{C}_{26}\text{H}_{23}\text{F}_3\text{N}_5\text{O}$  478.1849; found: 478.1862.

### Preparation of product 11<sup>3</sup>

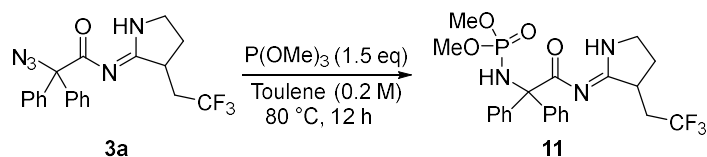

The mixture solution of azide **3a** (0.1 mmol, 1.0 equiv.) and  $\text{P}(\text{OMe})_3$  (0.15 mmol, 1.5 equiv.) in toluene (0.5 mL) was heated at 80 °C for 12 h. After completion, the organic solvent was evaporated under reduced pressure and the residue was purified by flash column chromatography on silica gel to afford the corresponding product.

### Spectral data for dimethyl (Z)-2-(2-oxo-1,1-diphenyl-2-((3-(2,2,2-trifluoroethyl)pyrrolidin-2-ylidene)amino)ethyl) phosphoramidate (11)

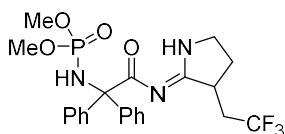

Purified by column chromatography (silica gel, EtOAc) to afford the title compound (91% yield, 44 mg) as yellowish oil.  $^1\text{H}$  NMR (300 MHz,  $\text{CDCl}_3$ )  $\delta$  9.94 (s, 1H), 7.54 – 7.46 (m, 4H), 7.33 – 7.21 (m, 6H), 5.72 (d,  $J$  = 12.0 Hz, 1H), 3.65 – 3.47 (m, 2H), 3.32 (d,  $J$  = 2.8 Hz, 3H), 3.29 (d,  $J$  = 2.7 Hz, 3H), 3.05 – 2.90 (m, 1H), 2.90 – 2.67 (m, 1H), 2.43 – 2.29 (m, 1H), 2.02 – 1.70 (m, 2H).  $^{13}\text{C}\{^1\text{H}\}$  NMR (100 MHz,  $\text{CDCl}_3$ )  $\delta$  186.0 (d,  $J$  = 11.9 Hz), 174.6, 141.8, 141.7, 129.9, 129.7, 127.3, 127.2, 127.0, 126.6 (q,  $J$  = 277.0 Hz), 71.8, 52.8, 52.7, 45.3, 39.3, 35.4 (q,  $J$  = 28.7 Hz), 26.8.  $^{19}\text{F}$  NMR (470 MHz,  $\text{CDCl}_3$ )  $\delta$  -64.52 (t,  $J$  = 11.0 Hz).  $^{31}\text{P}$  NMR (162 MHz,  $\text{CDCl}_3$ )  $\delta$  7.14. HRMS (ESI)  $m/z$ :  $[\text{M}+\text{H}]^+$  calcd for  $\text{C}_{22}\text{H}_{26}\text{F}_3\text{N}_3\text{O}_4\text{P}$  484.1608; found: 484.1592.

### Preparation of product 12<sup>4</sup>

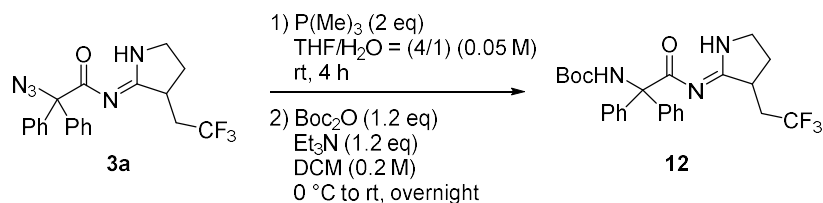

To a solution of the azido **3a** (0.1 mmol, 1 equiv.) in 2 mL of THF/ $\text{H}_2\text{O}$  (4/1), was added  $\text{P}(\text{Me})_3$  (0.2 mmol, 2 equiv.) at 0 °C. The resulting mixture was warmed to room temperature and stirred for 4 h. The mixture was washed with water and the aqueous layer was extracted with ethyl acetate. The combined organic phase was washed with brine, dried over  $\text{Na}_2\text{SO}_4$ , filtered and concentrated in vacuo affording amine without any further purification. To a suspension of amine (0.1 mmol, 1.0 equiv.) in DCM (0.5 ml) was added  $\text{Et}_3\text{N}$  (0.12 mmol, 1.2 equiv.) and  $\text{Boc}_2\text{O}$  (0.12 mmol, 1.2 equiv.) under nitrogen atmosphere at 0 °C. The resulting mixture was allowed to warm up to room temperature and stirred overnight. Upon completion, the reaction mixture was quenched with  $\text{H}_2\text{O}$  and the aqueous phase was extracted with DCM. The combined organic phases were washed with brine, dried over  $\text{Na}_2\text{SO}_4$ , filtered, and concentrated in vacuo. The residue was purified by flash chromatography to give the desired product.

### Spectral data for tert-butyl (Z)-(2-oxo-1,1-diphenyl-2-((3-(2,2,2-trifluoroethyl)pyrrolidin-2-ylidene)amino)ethyl) carbamate (12)

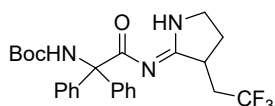

Purified by column chromatography (silica gel, EtOAc) to afford the title compound (62% yield, 30 mg) as yellowish oil.  $^1\text{H}$  NMR (400 MHz,  $\text{CDCl}_3$ )  $\delta$  10.27 (s, 1H), 7.55 – 7.39 (m, 4H), 7.35 – 7.22 (m, 6H), 4.86 (s, 1H), 3.35 – 3.19 (m, 1H), 3.14 – 2.87 (m, 3H), 2.51 – 2.27 (m, 1H), 1.98 – 1.83 (m, 2H), 1.42 (s, 9H).  $^{13}\text{C}\{^1\text{H}\}$  NMR (100 MHz,  $\text{CDCl}_3$ )  $\delta$  183.9, 163.8, 157.4, 140.2, 140.0, 128.5, 128.4, 127.7, 127.4 (q,  $J$  = 278.9 Hz), 127.1, 127.0, 80.6, 37.8, 36.1 (q,  $J$  = 29.6 Hz), 35.6, 31.6, 28.2.  $^{19}\text{F}$  NMR (376 MHz,  $\text{CDCl}_3$ )  $\delta$  -64.38. HRMS (ESI)  $m/z$ :  $[\text{M}+\text{H}]^+$  calcd for  $\text{C}_{25}\text{H}_{29}\text{F}_3\text{N}_3\text{O}_3$  476.2156; found: 476.2160.

### Preparation of product 13<sup>3</sup>

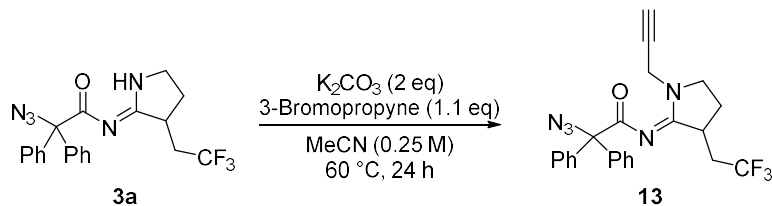

To a solution of compound **3a** (0.1 mmol, 1.0 equiv.) in  $\text{CH}_3\text{CN}$  (0.4 mL) at 0 °C was added  $\text{K}_2\text{CO}_3$  (0.2 mmol, 2.0 equiv.) and 3-Bromopropyne (0.11 mmol, 1.1 equiv.). The resulting mixture was heated at 60 °C for

24 h. After cooling to room temperature, the solvent was evaporated and the residue was dissolved in EtOAc, washed with H<sub>2</sub>O and brine. The organic layer was dried over Na<sub>2</sub>SO<sub>4</sub>, filtered, and concentrated under reduced pressure. The residue was purified by flash chromatography on silica gel to afford the corresponding product.

**Spectral data for (Z)-2-azido-2,2-diphenyl-N-(1-(prop-2-yn-1-yl)-3-(2,2,2-trifluoroethyl)pyrrolidin-2-ylidene)acetamide (**13**)**

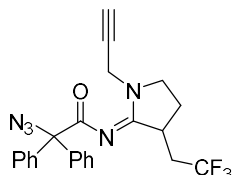

Purified by column chromatography (silica gel, EtOAc/Petroleum ether: 1/3) to afford the title compound (73% yield, 32 mg) as yellowish oil. <sup>1</sup>H NMR (400 MHz, CDCl<sub>3</sub>) δ 7.46 – 7.37 (m, 4H), 7.37 – 7.27 (m, 6H), 4.22 (dd, *J* = 2.6 Hz, 2.5 Hz, 2H), 3.83 – 3.71 (m, 1H), 3.64 – 3.48 (m, 2H), 2.37 – 2.29 (m, 1H), 2.28 (t, *J* = 2.6 Hz, 1H), 2.23 – 2.09 (m, 1H), 2.07 – 1.96 (m, 1H), 1.83 – 1.66 (m, 1H). <sup>13</sup>C{<sup>1</sup>H} NMR (100 MHz, CDCl<sub>3</sub>) δ 179.6, 171.1, 140.6, 140.5, 128.7, 128.6, 128.1, 128.0, 126.2 (q, *J* = 277.4 Hz), 79.3, 76.3, 73.6, 47.1, 36.5 (q, *J* = 2.8 Hz), 34.8, 34.0 (q, *J* = 28.9 Hz), 25.1. <sup>19</sup>F NMR (376 MHz, CDCl<sub>3</sub>) δ -63.94 (t, *J* = 10.6 Hz). HRMS (ESI) *m/z*: [M+H]<sup>+</sup> calcd for C<sub>23</sub>H<sub>21</sub>F<sub>3</sub>N<sub>5</sub>O 440.1693; found: 440.1684.

**Preparation of product **14**<sup>2</sup>**

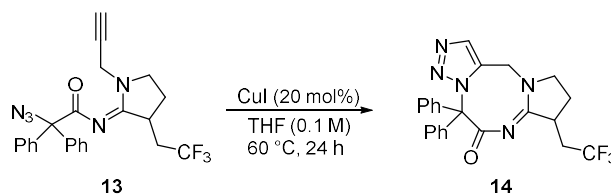

CuI (20 mol%, 0.02 mmol) and **13** (0.1 mmol, 1 equiv.) were added in an oven-dried sealed tube. The vessel was evacuated and backfilled with N<sub>2</sub> (repeated for 3 times), after that, THF (1.0 mL) were then added via syringe under N<sub>2</sub>. The tube was sealed with a Teflon lined cap and moved into a preheated oil bath at 60 °C for 24 h. The reaction mixture was then cooled to room temperature, diluted with EtOAc (10 mL) and filtered through a pad of celite. The filtrate was concentrated, and the residue was then purified by flash column chromatography to afford the corresponding product.

**Spectral data for (Z)-5,5-diphenyl-8-(2,2,2-trifluoroethyl)-9,10-dihydro-5H,12H-pyrrolo[1,2-a][1,2,3]triazolo[1,5-f][1,3,6]triazocin-6(8H)-one (**14**)**

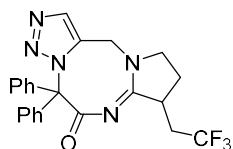

Purified by column chromatography (silica gel, MeOH/DCM : 1/10) to afford the title compound (65% yield, 29 mg) as yellowish oil. <sup>1</sup>H NMR (400 MHz, CDCl<sub>3</sub>) δ 7.55 (s, 1H), 7.26 – 7.11 (m, 10H), 4.44 (d, *J* = 15.1 Hz, 1H), 4.37 (d, *J* = 17.8 Hz, 1H), 3.83 (t, *J* = 10.6 Hz, 1H), 3.54 – 3.33 (m, 2H), 2.45 – 2.09 (m, 2H), 2.05 – 1.74 (m, 2H). <sup>13</sup>C{<sup>1</sup>H} NMR (100 MHz, CDCl<sub>3</sub>) δ 177.1, 172.2, 140.6, 140.0, 139.5, 129.6, 129.5, 129.4, 128.3, 128.2, 127.9, 126.4 (q, *J* = 277.7 Hz), 125.9, 80.8, 47.9, 40.5, 36.8, 33.9 (q, *J* = 28.4 Hz), 24.9. <sup>19</sup>F NMR (376 MHz, CDCl<sub>3</sub>) δ -63.78 (d, *J* = 11.3 Hz). HRMS (ESI) *m/z*: [M+H]<sup>+</sup> calcd for C<sub>23</sub>H<sub>21</sub>F<sub>3</sub>N<sub>5</sub>O 440.1693; found: 440.1702.



## Preparation of product 15

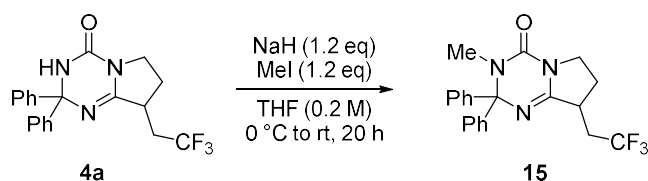

To a flame-dried Schlenk tube equipped with a magnetic stir bar were added **4a** (0.1 mmol, 1 equiv.), THF (0.5 mL), and NaH (1.2 equiv.) at 0 °C under N<sub>2</sub> atmosphere. After that MeI (1.2 equiv.) were then added via syringe. The resulting mixture was warmed to room temperature for 20 h. After completion, the solvent was evaporated and the residue was dissolved in DCM, washed with H<sub>2</sub>O and brine. The organic layer was dried over Na<sub>2</sub>SO<sub>4</sub>, filtered, and concentrated under reduced pressure. The residue was purified by flash chromatography on silica gel to afford the corresponding product.

**Spectral data for 3-methyl-2,2-diphenyl-8-(2,2,2-trifluoroethyl)-2,6,7,8-tetrahydropyrrolo[1,2-a][1,3,5]triazin-4(3H)-one (15)**

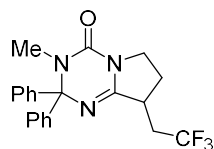

Purified by column chromatography (silica gel, EtOAc/Petroleum ether: 1/5) to afford the title compound (92% yield, 36 mg) as yellowish solid, mp: 99-101 °C. <sup>1</sup>H NMR (400 MHz, CDCl<sub>3</sub>) δ 7.31 – 7.22 (m, 6H), 7.21 – 7.11 (m, 4H), 3.82 – 3.71 (m, 1H), 3.56 – 3.44 (m, 1H), 3.04 – 2.92 (m, 1H), 2.92 – 2.74 (m, 1H), 2.60 (s, 3H), 2.35 – 2.24 (m, 1H), 2.01 – 1.81 (m, 1H), 1.73 – 1.58 (m, 1H). <sup>13</sup>C {<sup>1</sup>H} NMR (100 MHz, CDCl<sub>3</sub>) δ 157.4, 152.1, 143.0, 142.4, 128.5, 128.2, 128.1, 128.0, 127.6, 126.7 (q, *J* = 276.8 Hz), 84.1, 44.2, 36.7 (q, *J* = 2.9 Hz), 35.7 (q, *J* = 28.9 Hz), 32.0, 27.3. <sup>19</sup>F NMR (376 MHz, CDCl<sub>3</sub>) δ -64.71 (t, *J* = 11.0 Hz). HRMS (ESI) *m/z*: [M+H]<sup>+</sup> calcd for C<sub>21</sub>H<sub>21</sub>F<sub>3</sub>N<sub>3</sub>O 388.1637; found: 388.1631.

## Preparation of product 16<sup>2</sup>

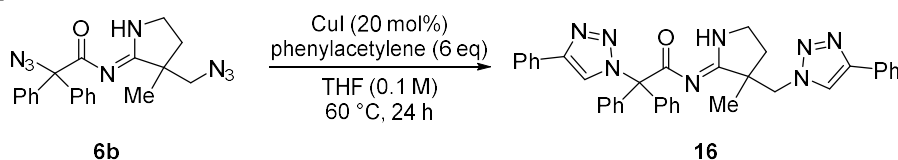

CuI (0.02 mmol) and **6b** (0.1 mmol, 1 equiv.) were added in an oven-dried sealed tube. The vessel was evacuated and backfilled with N<sub>2</sub> (repeated for 3 times), after that, phenylacetylene (0.6 mmol, 6.0 equiv.) and THF (1.0 mL) were then added via syringe under N<sub>2</sub>. The tube was sealed with a Teflon lined cap and moved into a preheated oil bath at 60 °C for 24 h. The reaction mixture was then cooled to room temperature, diluted with EtOAc (10 mL) and filtered through a pad of celite. The filtrate was concentrated, and the residue was then purified by flash column chromatography to afford the corresponding product.

**Spectral data for (Z)-N-(3-methyl-3-((4-phenyl-1H-1,2,3-triazol-1-yl)methyl)pyrrolidin-2-ylidene)-2,2-diphenyl-2-(4-phenyl-1H-1,2,3-triazol-1-yl)acetamide (16)**

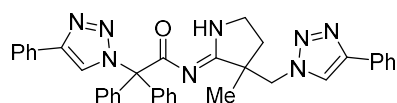

Purified by column chromatography (silica gel, EtOAc/Petroleum ether: 1/2) to afford the title compound (84% yield, 50 mg) as yellowish oil. <sup>1</sup>H NMR (400 MHz, CDCl<sub>3</sub>) δ 9.66 (s, 1H), 7.76 – 7.63 (m, 5H), 7.49 (s, 1H), 7.41 –

7.19 (m, 15H), 7.17 (s, 1H), 4.24 (d,  $J = 13.8$  Hz, 1H), 4.16 (d,  $J = 13.8$  Hz, 1H), 3.47 – 3.29 (m, 1H), 3.07 – 2.89 (m, 1H), 2.27 – 2.10 (m, 1H), 1.85 – 1.72 (m, 1H), 1.13 (s, 3H).  $^{13}\text{C}\{^1\text{H}\}$  NMR (100 MHz,  $\text{CDCl}_3$ )  $\delta$  182.9, 176.7, 147.9, 145.9, 140.2, 140.0, 130.9, 130.4, 129.9, 129.7, 128.9, 128.8, 128.7, 128.4, 128.2, 128.1, 128.0, 127.9, 125.9, 125.7, 122.7, 121.5, 80.3, 55.6, 49.5, 44.1, 29.2, 22.8. HRMS (ESI)  $m/z$ :  $[\text{M}+\text{H}]^+$  calcd for  $\text{C}_{36}\text{H}_{33}\text{N}_8\text{O}$  593.2772; found: 593.2756.

### Preparation of product 17<sup>5</sup>

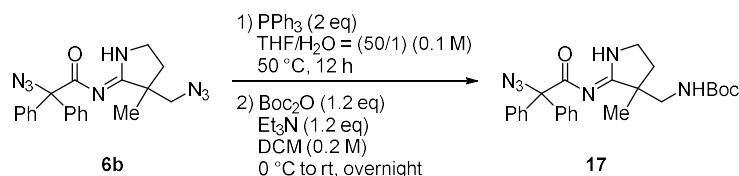

To a flame-dried Schlenk tube were added azide product **6b** (0.1 mmol, 1 equiv.), THF (1.0 mL) and  $\text{H}_2\text{O}$  (20.0  $\mu\text{L}$ ) under the atmosphere of nitrogen, a solution of  $\text{PPh}_3$  (0.2 mmol, 2 equiv.) in THF (0.5 mL) was added drop-wise at 0 °C. The mixture was warmed up to 50 °C and stirred for 12 h. The mixture was then concentrated in vacuo and the residue was extracted with EtOAc. The combined organic layers were washed with water and brine, dried over  $\text{Na}_2\text{SO}_4$ , filtered and concentrated in vacuo affording amine without any further purification. To a suspension of amine (0.1 mmol, 1.0 equiv.) in DCM (0.5 mL) was added  $\text{Et}_3\text{N}$  (0.12 mmol, 1.2 equiv.) and  $\text{Boc}_2\text{O}$  (0.12 mmol, 1.2 equiv.) under nitrogen atmosphere at 0 °C. The resulting mixture was allowed to warm up to room temperature and stirred overnight. Upon completion, the reaction mixture was quenched with  $\text{H}_2\text{O}$  and the aqueous phase was extracted with DCM. The combined organic phases were washed with brine, dried over  $\text{Na}_2\text{SO}_4$ , filtered, and concentrated in vacuo. The residue was purified by flash chromatography to give the desired product.

### Spectral data for Tert-butyl (Z)-((2-((2-azido-2,2-diphenylacetyl)imino)-3-methylpyrrolidin-3-yl)methyl)carbamate (17)

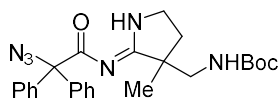

Purified by column chromatography (silica gel, EtOAc/Petroleum ether: 1/3) to afford the title compound (95% yield, 44 mg) as yellowish oil.  $^1\text{H}$  NMR (500 MHz,  $\text{CDCl}_3$ )  $\delta$  9.77 (s, 1H), 7.45 – 7.40 (m, 2H), 7.38 – 7.28 (m, 8H), 5.01 (t,  $J = 6.6$  Hz, 1H), 3.65 – 3.44 (m, 2H), 3.26 – 3.07 (m, 2H), 2.08 – 1.96 (m, 1H), 1.85 – 1.72 (m, 1H), 1.40 (s, 9H), 1.11 (s, 3H).  $^{13}\text{C}\{^1\text{H}\}$  NMR (125 MHz,  $\text{CDCl}_3$ )  $\delta$  184.8, 178.8, 156.6, 141.0, 140.5, 128.6, 128.5, 128.2, 128.1, 128.0, 127.9, 79.2, 48.2, 46.5, 44.2, 30.7, 28.4, 21.1. HRMS (ESI)  $m/z$ :  $[\text{M}+\text{H}]^+$  calcd for  $\text{C}_{25}\text{H}_{31}\text{N}_6\text{O}_3$  463.2452; found: 463.2447.

### Preparation of product 18

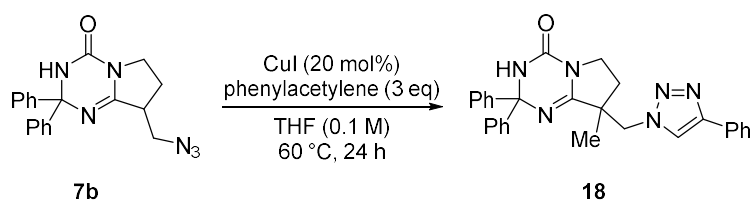

Product **18** was prepared from **7b** (0.1 mmol) by the same procedure as product **9**.

### Spectral data for 8-methyl-2,2-diphenyl-8-((4-phenyl-1H-1,2,3-triazol-1-yl)methyl)-2,6,7,8-tetrahydropyrrolo[1,2-a][1,3,5]triazin-4(3H)-one (18)

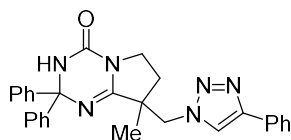

Purified by column chromatography (silica gel, EtOAc/Petroleum ether: 1/1) to afford the title compound (92% yield, 43 mg) as yellowish solid, mp: 114-116 °C. <sup>1</sup>H NMR (500 MHz, CDCl<sub>3</sub>) δ 7.51 – 7.42 (m, 4H), 7.41 – 7.26 (m, 11H), 7.05 (s, 1H), 6.04 (brs, 1H), 4.68 (d, *J* = 14.0 Hz, 1H), 4.60 (d, *J* = 14.0 Hz, 1H), 3.61 – 3.47 (m, 1H), 3.38 – 3.26 (m, 1H), 1.97 – 1.78 (m, 2H), 1.45 (s, 3H). <sup>13</sup>C{<sup>1</sup>H} NMR (125 MHz, CDCl<sub>3</sub>) δ 159.8, 150.6, 148.0, 145.9, 145.1, 130.2, 128.8, 128.6, 128.5, 128.2, 128.1, 128.0, 126.3, 126.2, 126.0, 120.4, 79.7, 55.8, 46.9, 41.6, 29.7, 23.5. HRMS (ESI) *m/z*: [M+H]<sup>+</sup> calcd for C<sub>28</sub>H<sub>27</sub>N<sub>6</sub>O 463.2241; found: 463.2236.

### Preparation of product 19

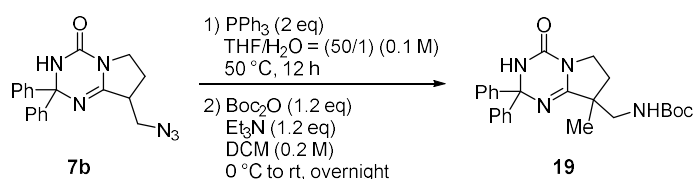

Product **19** was prepared from **7b** (0.1 mmol) according to the same method for the preparation of product **17**.

### Spectral data for Tert-butyl ((8-methyl-4-oxo-2,2-diphenyl-2,3,4,6,7,8-hexahydropyrrolo[1,2-a][1,3,5]triazin-8-yl)methyl)carbamate (**19**)

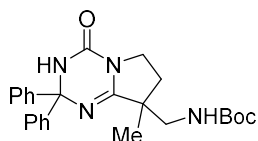

Purified by column chromatography (silica gel, EtOAc/Petroleum ether: 1/2) to afford the title compound (93% yield, 40 mg) as yellowish solid, mp: 83-85 °C. <sup>1</sup>H NMR (500 MHz, CDCl<sub>3</sub>) δ 7.42 – 7.27 (m, 10H), 5.99 (brs, 1H), 4.83 (t, *J* = 6.3 Hz, 1H), 3.71 – 3.53 (m, 2H), 3.36 – 3.21 (m, 2H), 2.01 – 1.91 (m, 1H), 1.79 – 1.68 (m, 1H), 1.39 (s, 9H), 1.26 (s, 3H). <sup>13</sup>C{<sup>1</sup>H} NMR (125 MHz, CDCl<sub>3</sub>) δ 161.6, 156.4, 151.3, 145.3, 128.5, 128.4, 127.9, 127.8, 126.4, 125.9, 79.3, 79.0, 46.9, 46.0, 41.9, 30.7, 28.4, 21.9. HRMS (ESI) *m/z*: [M+H]<sup>+</sup> calcd for C<sub>25</sub>H<sub>31</sub>N<sub>4</sub>O<sub>3</sub> 435.2391; found: 435.2409.

## VI. Control Experiments

### 1. Radical Trapping Experiment

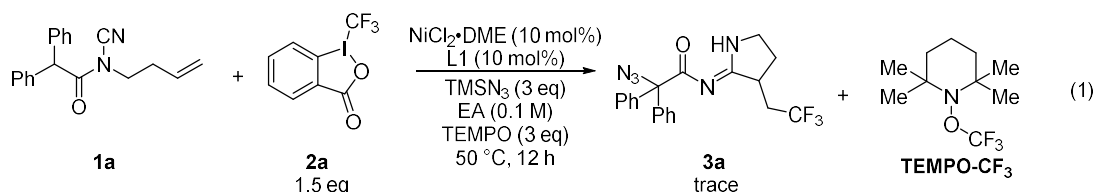

**3a**: trace, < 5% conv (**1a**);  
**TEMPO-CF<sub>3</sub>**: 78% (based on <sup>19</sup>F NMR using PhCF<sub>3</sub> as the internal standard)

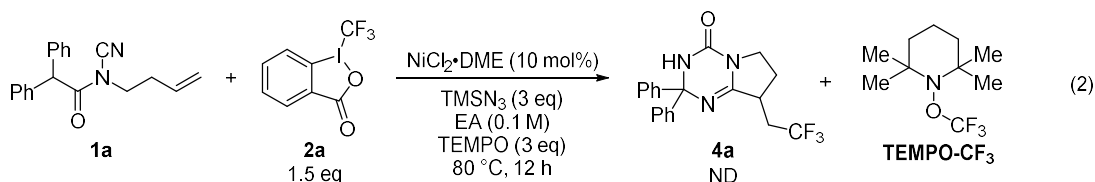

**4a**: ND  
**TEMPO-CF<sub>3</sub>**: 40% (based on <sup>19</sup>F NMR using PhCF<sub>3</sub> as the internal standard)

**TEMPO-CF<sub>3</sub>**: <sup>19</sup>F NMR (376 MHz, CDCl<sub>3</sub>)  $\delta$  -55.71. HRMS *m/z* (ESI) calcd for C<sub>10</sub>H<sub>19</sub>F<sub>3</sub>NO [M+H]<sup>+</sup> 226.1413, found 226.1416. The <sup>19</sup>F NMR spectra data were in accordance with the reported data of the known literatures.<sup>6</sup>

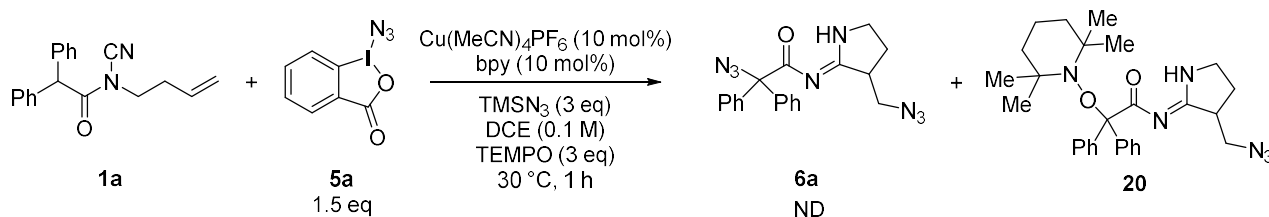

**6a**: ND, < 5% conv (**1a**);  
**20** was detected by LC-HRMS

### Characterization of TEMPO-1a-N<sub>3</sub> additive product S-1 by mass spectrometry

Reaction mixture was analyzed on a LC/MS (Agilent 1290 Infinity LC System connected to the Bruker micrOTOF-QII MS instrument). The high-resolution mass spectrometry was performed to confirm the elemental compositions of TEMPO-**1a**-N<sub>3</sub> additive product **20**. **20**: HRMS (ESI) *m/z*: [M+H]<sup>+</sup> calcd for C<sub>28</sub>H<sub>37</sub>N<sub>6</sub>O<sub>2</sub> 489.2973; found: 489.2969 (Figure S2, a). The major product ions were observed in the fragmentation of protonated TEMPO additive product by CID mass spectra with argon as collision gas after isolation of the target precursor ion (Figure S2, b). The possible chemical structure of TEMPO additive product **20** and the major product ions observed in the fragmentation of its [M+H]<sup>+</sup> ion were given in Scheme S1.

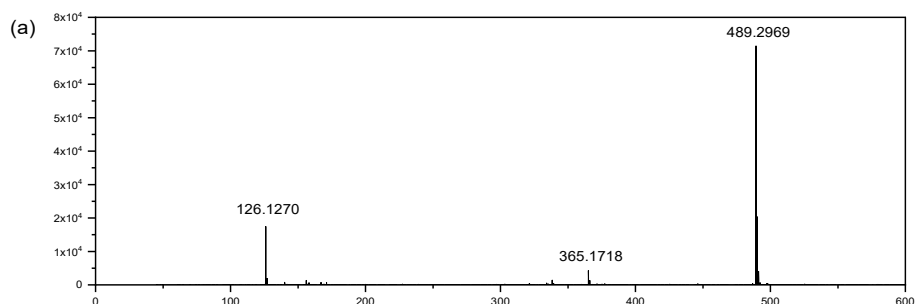

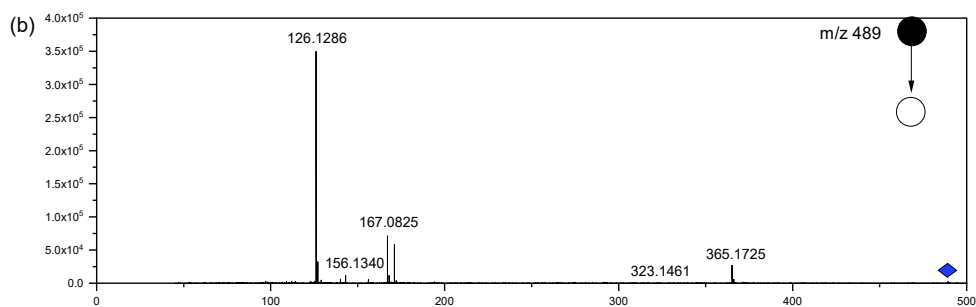

**Figure S2.** (a) High resolution mass spectra of TEMPO additive product **20** from reaction mixture by LC/MS. (b) MS<sup>2</sup> mass spectra of protonated TEMPO additive product **20**.

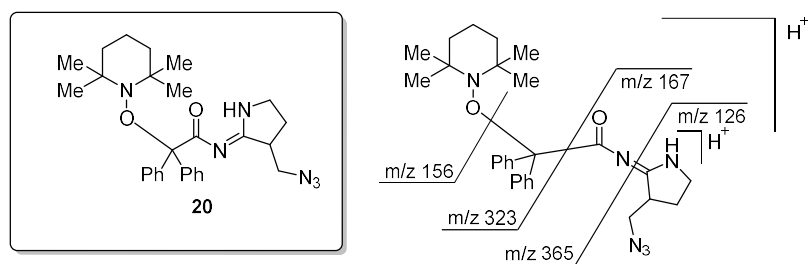

**20:** HRMS (ESI)  $m/z$ :  $[M+H]^+$  calcd for  $C_{28}H_{37}N_6O_2$  489.2973; found: 489.2969.

**Scheme S1.** The possible chemical structure of TEMPO additive product **20** and the major product ions observed in the fragmentation of its  $[M+H]^+$  ion.

## 2. Intermolecular cross-over reaction

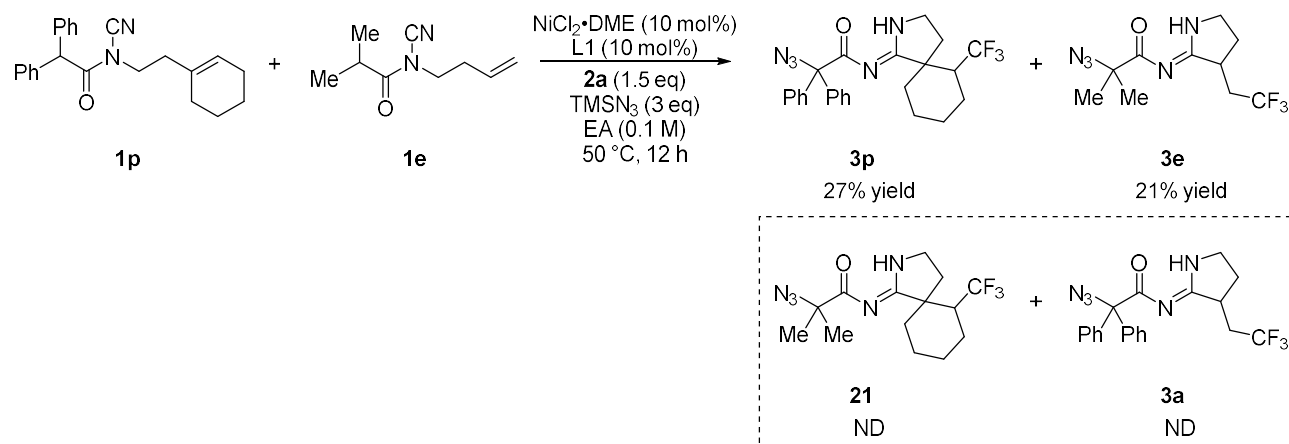

### 3. Nitrene intermediates verification experiment

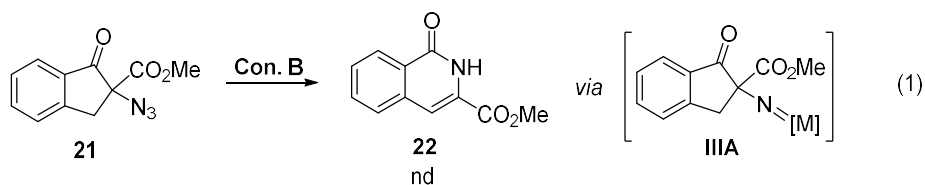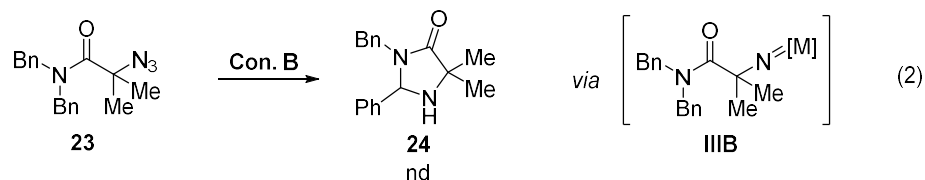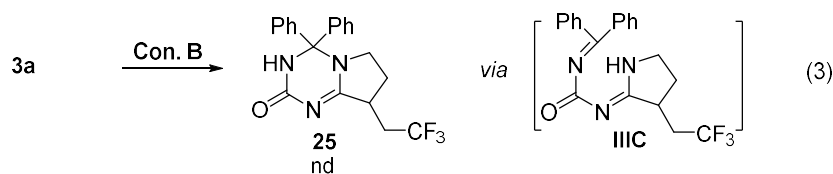

Con. B: NiCl<sub>2</sub>·DME (10 mol%), EtOAc (0.1 M), 80 °C, 12 h

Under our reaction condition B, the substrates in the literature that generate products through nitrene intermediates are unable to generate target products. These experiments show that under our reaction condition, there may be no nitrene intermediates produced.<sup>7, 8</sup> Notably, compound **3a** cannot undergo a similar 1,2-acylmigration to give cyclic compound **25**, presumably due to the attenuated reactivity of carbonyl group of **3a**.

## VII. References

1. Xi, J.-M.; Sun, Y.-H.; Li, W.-C.; Wu, Y.-H.; Wei, Z.-L.; Liao, W.-W. *Org. Lett.* **2022**, *24*, 1110-1115.
2. Bian, K.-J.; Li, Y.; Zhang, K.-F.; He, Y.; Wu, T.-R.; Wang, C.-Y.; Wang, X.-S. *Chem. Sci.* **2020**, *11*, 10437-10443.
3. Lv, D.; Sun, Q.; Zhou, H.; Ge, L.; Qu, Y.; Li, T.; Ma, X.; Li, Y.; Bao, H. *Angew. Chem. Int. Ed.* **2021**, *60*, 12455-12460.
4. Gomes, R. S.; Reddy, K. M.; Corey, E. J. *Org. Lett.* **2018**, *20*, 6310-6313.
5. Luo, Y.; Lv, L.; Li, Z. *Org. Lett.* **2022**, *24*, 8052-8056.
6. Choi, G.; Lee, G. S.; Park, B.; Kim, D.; Hong, S. H. *Angew. Chem. Int. Ed.* **2021**, *60*, 5467-5474.
7. Yang, T.; Fan, X.; Zhao, X.; Yu, W. *Org. Lett.* **2018**, *20*, 1875-1879.
8. Zhao, X.; Liang, S.; Fan, X.; Yang, T.; Yu, W. *Org. Lett.* **2019**, *21*, 1559-1563.

## VIII. Crystal Data and Structure Refinement for Compounds

1)

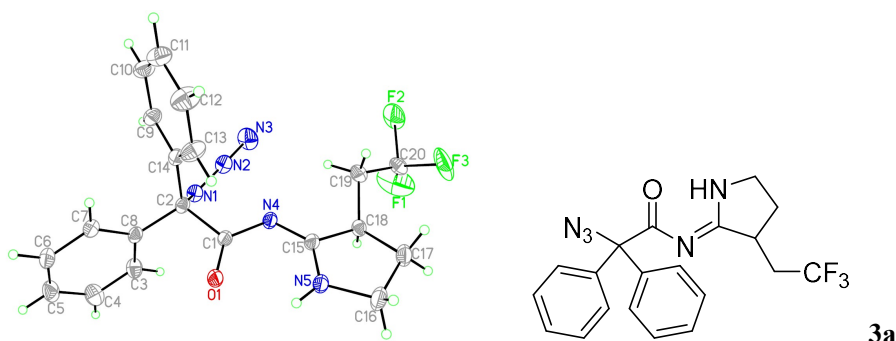

X-ray crystal structure of compound **3a**. Single crystal of **3a** was obtained by slow evaporation of Petroleum ether /EtOAc solution. Crystal measurement of **3a** was measured on R-Axis RAPID of Rigaku Corporation plus 291.2 k. Thermal ellipsoids are set at 30% probability.

**CCDC number:** 2341706

Table S-crystal1-1. Crystal data and structure refinement for **3a**.

|                                 |                                                                                                             |
|---------------------------------|-------------------------------------------------------------------------------------------------------------|
| Identification code             | Y                                                                                                           |
| Empirical formula               | C <sub>20</sub> H <sub>18</sub> F <sub>3</sub> N <sub>5</sub> O                                             |
| Formula weight                  | 401.39                                                                                                      |
| Temperature                     | 293(2) K                                                                                                    |
| Wavelength                      | 0.71073 Å                                                                                                   |
| Crystal system                  | Monoclinic                                                                                                  |
| Space group                     | P2 <sub>1</sub> /c                                                                                          |
| Unit cell dimensions            | a = 13.4542(7) Å      α = 90°.<br>b = 19.2551(10) Å     β = 104.380(2)°.<br>c = 7.9463(4) Å        γ = 90°. |
| Volume                          | 1994.09(18) Å <sup>3</sup>                                                                                  |
| Z                               | 4                                                                                                           |
| Density (calculated)            | 1.337 Mg/m <sup>3</sup>                                                                                     |
| Absorption coefficient          | 0.106 mm <sup>-1</sup>                                                                                      |
| F(000)                          | 832                                                                                                         |
| Crystal size                    | 0.210 x 0.200 x 0.180 mm <sup>3</sup>                                                                       |
| Theta range for data collection | 2.630 to 25.649°.                                                                                           |
| Index ranges                    | -16 ≤ h ≤ 16, -23 ≤ k ≤ 23, -9 ≤ l ≤ 9                                                                      |
| Reflections collected           | 35677                                                                                                       |
| Independent reflections         | 3771 [R(int) = 0.0393]                                                                                      |
| Completeness to theta = 25.242° | 99.9 %                                                                                                      |
| Absorption correction           | Semi-empirical from equivalents                                                                             |
| Max. and min. transmission      | 0.9812 and 0.9782                                                                                           |



|                                   |                                             |
|-----------------------------------|---------------------------------------------|
| Refinement method                 | Full-matrix least-squares on F <sup>2</sup> |
| Data / restraints / parameters    | 3771 / 0 / 317                              |
| Goodness-of-fit on F <sup>2</sup> | 1.012                                       |
| Final R indices [I>2sigma(I)]     | R1 = 0.0484, wR2 = 0.1180                   |
| R indices (all data)              | R1 = 0.0635, wR2 = 0.1309                   |
| Extinction coefficient            | n/a                                         |
| Largest diff. peak and hole       | 0.199 and -0.230 e.Å <sup>-3</sup>          |

Table S-crystal1-2. Atomic coordinates (x 10<sup>4</sup>) and equivalent isotropic displacement parameters (Å<sup>2</sup>x 10<sup>3</sup>) for Y. U(eq) is defined as one third of the trace of the orthogonalized U<sup>ij</sup> tensor.

|       | x        | y        | z       | U(eq) |
|-------|----------|----------|---------|-------|
| O(1)  | 8758(1)  | 30(1)    | 8712(2) | 61(1) |
| N(1)  | 6756(1)  | 17(1)    | 4898(2) | 54(1) |
| N(2)  | 6793(1)  | 483(1)   | 3843(2) | 61(1) |
| N(3)  | 6772(2)  | 859(1)   | 2748(2) | 91(1) |
| N(4)  | 8680(1)  | 603(1)   | 6122(2) | 48(1) |
| N(5)  | 10379(1) | 626(1)   | 7936(2) | 55(1) |
| C(1)  | 8286(1)  | 268(1)   | 7311(2) | 42(1) |
| C(2)  | 7094(1)  | 222(1)   | 6783(2) | 42(1) |
| C(3)  | 6894(2)  | -1051(1) | 7346(3) | 64(1) |
| C(4)  | 6589(2)  | -1598(1) | 8236(3) | 79(1) |
| C(5)  | 6118(2)  | -1470(1) | 9550(3) | 74(1) |
| C(6)  | 5961(2)  | -802(1)  | 9984(3) | 71(1) |
| C(7)  | 6262(1)  | -252(1)  | 9095(3) | 58(1) |
| C(8)  | 6730(1)  | -372(1)  | 7758(2) | 46(1) |
| C(9)  | 5636(1)  | 1088(1)  | 6278(3) | 57(1) |
| C(10) | 5216(2)  | 1716(1)  | 6585(3) | 69(1) |
| C(11) | 5780(2)  | 2187(1)  | 7701(3) | 75(1) |
| C(12) | 6772(2)  | 2032(1)  | 8542(4) | 86(1) |
| C(13) | 7202(2)  | 1404(1)  | 8238(3) | 70(1) |
| C(14) | 6645(1)  | 925(1)   | 7099(2) | 45(1) |
| C(15) | 9665(1)  | 759(1)   | 6532(2) | 46(1) |
| C(16) | 11390(2) | 899(2)   | 7951(3) | 89(1) |
| C(17) | 11226(2) | 1251(1)  | 6233(3) | 66(1) |
| C(18) | 10150(5) | 1020(4)  | 5126(8) | 45(1) |
| C(19) | 9426(4)  | 1541(3)  | 4007(7) | 61(2) |

|        |           |          |          |        |
|--------|-----------|----------|----------|--------|
| C(20)  | 9870(20)  | 1686(10) | 2360(30) | 60(3)  |
| F(1)   | 9949(8)   | 1296(5)  | 1497(10) | 202(4) |
| F(2)   | 9116(4)   | 2206(4)  | 1489(11) | 136(3) |
| F(3)   | 10665(11) | 2177(7)  | 3113(16) | 155(5) |
| C(18') | 10124(4)  | 1304(3)  | 5491(8)  | 44(1)  |
| C(19') | 9723(4)   | 1174(3)  | 3558(5)  | 55(1)  |
| C(20') | 9850(20)  | 1863(9)  | 2600(30) | 70(4)  |
| F(1')  | 9633(4)   | 1633(4)  | 811(5)   | 110(2) |
| F(2')  | 9418(6)   | 2340(3)  | 2720(9)  | 129(2) |
| F(3')  | 10837(8)  | 1933(6)  | 2690(13) | 110(3) |

Table S-crystal1-3. Bond lengths [Å] and angles [°] for Y.

|            |          |
|------------|----------|
| O(1)-C(1)  | 1.225(2) |
| N(1)-N(2)  | 1.238(2) |
| N(1)-C(2)  | 1.506(2) |
| N(2)-N(3)  | 1.126(2) |
| N(4)-C(15) | 1.318(2) |
| N(4)-C(1)  | 1.357(2) |
| N(5)-C(15) | 1.304(2) |
| N(5)-C(16) | 1.455(2) |
| N(5)-H(5N) | 0.8495   |
| C(1)-C(2)  | 1.555(2) |
| C(2)-C(8)  | 1.529(2) |
| C(2)-C(14) | 1.529(2) |
| C(3)-C(8)  | 1.379(3) |
| C(3)-C(4)  | 1.386(3) |
| C(3)-H(3)  | 0.9300   |
| C(4)-C(5)  | 1.372(3) |
| C(4)-H(4)  | 0.9300   |
| C(5)-C(6)  | 1.362(3) |
| C(5)-H(5)  | 0.9300   |
| C(6)-C(7)  | 1.387(3) |
| C(6)-H(6)  | 0.9300   |
| C(7)-C(8)  | 1.383(3) |
| C(7)-H(7)  | 0.9300   |
| C(9)-C(10) | 1.381(3) |

|                |            |
|----------------|------------|
| C(9)-C(14)     | 1.387(2)   |
| C(9)-H(9)      | 0.9300     |
| C(10)-C(11)    | 1.360(3)   |
| C(10)-H(10)    | 0.9300     |
| C(11)-C(12)    | 1.370(3)   |
| C(11)-H(11)    | 0.9300     |
| C(12)-C(13)    | 1.386(3)   |
| C(12)-H(12)    | 0.9300     |
| C(13)-C(14)    | 1.376(3)   |
| C(13)-H(13)    | 0.9300     |
| C(15)-C(18)    | 1.513(6)   |
| C(15)-C(18')   | 1.556(6)   |
| C(16)-C(17)    | 1.491(3)   |
| C(16)-H(16A)   | 0.9700     |
| C(16)-H(16B)   | 0.9700     |
| C(17)-C(18')   | 1.457(6)   |
| C(17)-C(18)    | 1.561(7)   |
| C(17)-H(17A)   | 0.9700     |
| C(17)-H(17B)   | 0.9700     |
| C(18)-C(19)    | 1.521(9)   |
| C(18)-H(18)    | 0.9800     |
| C(19)-C(20)    | 1.59(3)    |
| C(19)-H(19A)   | 0.9700     |
| C(19)-H(19B)   | 0.9700     |
| C(20)-F(1)     | 1.041(19)  |
| C(20)-F(3)     | 1.44(2)    |
| C(20)-F(2)     | 1.47(3)    |
| C(18')-C(19')  | 1.517(8)   |
| C(18')-H(18')  | 0.9801     |
| C(19')-C(20')  | 1.56(2)    |
| C(19')-H(19C)  | 0.9700     |
| C(19')-H(19D)  | 0.9700     |
| C(20')-F(2')   | 1.11(2)    |
| C(20')-F(3')   | 1.32(3)    |
| C(20')-F(1')   | 1.45(2)    |
| N(2)-N(1)-C(2) | 115.46(15) |
| N(3)-N(2)-N(1) | 172.4(2)   |

|                   |            |
|-------------------|------------|
| C(15)-N(4)-C(1)   | 118.65(14) |
| C(15)-N(5)-C(16)  | 115.11(16) |
| C(15)-N(5)-H(5N)  | 125.5      |
| C(16)-N(5)-H(5N)  | 119.3      |
| O(1)-C(1)-N(4)    | 127.29(15) |
| O(1)-C(1)-C(2)    | 119.45(14) |
| N(4)-C(1)-C(2)    | 113.21(14) |
| N(1)-C(2)-C(8)    | 104.59(13) |
| N(1)-C(2)-C(14)   | 111.20(13) |
| C(8)-C(2)-C(14)   | 112.90(13) |
| N(1)-C(2)-C(1)    | 108.68(13) |
| C(8)-C(2)-C(1)    | 110.14(13) |
| C(14)-C(2)-C(1)   | 109.20(13) |
| C(8)-C(3)-C(4)    | 121.0(2)   |
| C(8)-C(3)-H(3)    | 119.5      |
| C(4)-C(3)-H(3)    | 119.5      |
| C(5)-C(4)-C(3)    | 120.2(2)   |
| C(5)-C(4)-H(4)    | 119.9      |
| C(3)-C(4)-H(4)    | 119.9      |
| C(6)-C(5)-C(4)    | 119.5(2)   |
| C(6)-C(5)-H(5)    | 120.3      |
| C(4)-C(5)-H(5)    | 120.3      |
| C(5)-C(6)-C(7)    | 120.6(2)   |
| C(5)-C(6)-H(6)    | 119.7      |
| C(7)-C(6)-H(6)    | 119.7      |
| C(8)-C(7)-C(6)    | 120.6(2)   |
| C(8)-C(7)-H(7)    | 119.7      |
| C(6)-C(7)-H(7)    | 119.7      |
| C(3)-C(8)-C(7)    | 118.09(18) |
| C(3)-C(8)-C(2)    | 119.94(16) |
| C(7)-C(8)-C(2)    | 121.94(17) |
| C(10)-C(9)-C(14)  | 120.69(19) |
| C(10)-C(9)-H(9)   | 119.7      |
| C(14)-C(9)-H(9)   | 119.7      |
| C(11)-C(10)-C(9)  | 120.8(2)   |
| C(11)-C(10)-H(10) | 119.6      |
| C(9)-C(10)-H(10)  | 119.6      |
| C(10)-C(11)-C(12) | 119.4(2)   |

|                     |            |
|---------------------|------------|
| C(10)-C(11)-H(11)   | 120.3      |
| C(12)-C(11)-H(11)   | 120.3      |
| C(11)-C(12)-C(13)   | 120.2(2)   |
| C(11)-C(12)-H(12)   | 119.9      |
| C(13)-C(12)-H(12)   | 119.9      |
| C(14)-C(13)-C(12)   | 121.0(2)   |
| C(14)-C(13)-H(13)   | 119.5      |
| C(12)-C(13)-H(13)   | 119.5      |
| C(13)-C(14)-C(9)    | 117.85(17) |
| C(13)-C(14)-C(2)    | 121.87(16) |
| C(9)-C(14)-C(2)     | 120.25(16) |
| N(5)-C(15)-N(4)     | 130.41(16) |
| N(5)-C(15)-C(18)    | 109.7(3)   |
| N(4)-C(15)-C(18)    | 118.9(3)   |
| N(5)-C(15)-C(18')   | 106.4(3)   |
| N(4)-C(15)-C(18')   | 122.0(2)   |
| N(5)-C(16)-C(17)    | 103.39(16) |
| N(5)-C(16)-H(16A)   | 111.1      |
| C(17)-C(16)-H(16A)  | 111.1      |
| N(5)-C(16)-H(16B)   | 111.1      |
| C(17)-C(16)-H(16B)  | 111.1      |
| H(16A)-C(16)-H(16B) | 109.0      |
| C(18')-C(17)-C(16)  | 107.8(3)   |
| C(16)-C(17)-C(18)   | 107.0(3)   |
| C(16)-C(17)-H(17A)  | 110.3      |
| C(18)-C(17)-H(17A)  | 110.3      |
| C(16)-C(17)-H(17B)  | 110.3      |
| C(18)-C(17)-H(17B)  | 110.3      |
| H(17A)-C(17)-H(17B) | 108.6      |
| C(15)-C(18)-C(19)   | 108.7(5)   |
| C(15)-C(18)-C(17)   | 100.8(4)   |
| C(19)-C(18)-C(17)   | 120.7(5)   |
| C(15)-C(18)-H(18)   | 108.7      |
| C(19)-C(18)-H(18)   | 108.6      |
| C(17)-C(18)-H(18)   | 108.7      |
| C(18)-C(19)-C(20)   | 106.1(10)  |
| C(18)-C(19)-H(19A)  | 110.5      |
| C(20)-C(19)-H(19A)  | 110.5      |

|                      |           |
|----------------------|-----------|
| C(18)-C(19)-H(19B)   | 110.5     |
| C(20)-C(19)-H(19B)   | 110.5     |
| H(19A)-C(19)-H(19B)  | 108.7     |
| F(1)-C(20)-F(3)      | 124(2)    |
| F(1)-C(20)-F(2)      | 110.4(19) |
| F(3)-C(20)-F(2)      | 95.9(14)  |
| F(1)-C(20)-C(19)     | 122.2(19) |
| F(3)-C(20)-C(19)     | 99.6(14)  |
| F(2)-C(20)-C(19)     | 98.5(15)  |
| C(17)-C(18')-C(19')  | 117.9(5)  |
| C(17)-C(18')-C(15)   | 103.6(4)  |
| C(19')-C(18')-C(15)  | 109.8(4)  |
| C(17)-C(18')-H(18')  | 108.4     |
| C(19')-C(18')-H(18') | 108.4     |
| C(15)-C(18')-H(18')  | 108.3     |
| C(18')-C(19')-C(20') | 107.3(9)  |
| C(18')-C(19')-H(19C) | 110.2     |
| C(20')-C(19')-H(19C) | 110.2     |
| C(18')-C(19')-H(19D) | 110.2     |
| C(20')-C(19')-H(19D) | 110.2     |
| H(19C)-C(19')-H(19D) | 108.5     |
| F(2')-C(20')-F(3')   | 117.2(17) |
| F(2')-C(20')-F(1')   | 110.7(18) |
| F(3')-C(20')-F(1')   | 92.4(16)  |
| F(2')-C(20')-C(19')  | 123(2)    |
| F(3')-C(20')-C(19')  | 107.1(16) |
| F(1')-C(20')-C(19')  | 101.4(11) |

---

Symmetry transformations used to generate equivalent atoms:

Table S-crystal1-4. Anisotropic displacement parameters ( $\text{\AA}^2 \times 10^3$ ) for Y. The anisotropic displacement factor exponent takes the form:  $-2\pi^2 [ h^2 a^{*2} U^{11} + \dots + 2 h k a^* b^* U^{12} ]$

---

|      | U <sup>11</sup> | U <sup>22</sup> | U <sup>33</sup> | U <sup>23</sup> | U <sup>13</sup> | U <sup>12</sup> |
|------|-----------------|-----------------|-----------------|-----------------|-----------------|-----------------|
| O(1) | 38(1)           | 88(1)           | 56(1)           | 29(1)           | 6(1)            | -5(1)           |
| N(1) | 51(1)           | 67(1)           | 42(1)           | -5(1)           | 7(1)            | -5(1)           |
| N(2) | 55(1)           | 84(1)           | 39(1)           | -3(1)           | 6(1)            | -2(1)           |

---

|        |         |        |        |        |        |        |
|--------|---------|--------|--------|--------|--------|--------|
| N(3)   | 101(2)  | 120(2) | 45(1)  | 16(1)  | 7(1)   | -7(1)  |
| N(4)   | 36(1)   | 64(1)  | 42(1)  | 9(1)   | 11(1)  | -1(1)  |
| N(5)   | 38(1)   | 77(1)  | 49(1)  | 19(1)  | 8(1)   | -7(1)  |
| C(1)   | 36(1)   | 50(1)  | 41(1)  | 4(1)   | 10(1)  | 1(1)   |
| C(2)   | 34(1)   | 56(1)  | 37(1)  | -2(1)  | 7(1)   | -1(1)  |
| C(3)   | 69(1)   | 61(1)  | 66(1)  | -9(1)  | 27(1)  | -12(1) |
| C(4)   | 90(2)   | 59(1)  | 86(2)  | -6(1)  | 22(1)  | -24(1) |
| C(5)   | 60(1)   | 82(2)  | 81(2)  | 14(1)  | 17(1)  | -26(1) |
| C(6)   | 51(1)   | 93(2)  | 74(1)  | 18(1)  | 29(1)  | 0(1)   |
| C(7)   | 46(1)   | 70(1)  | 61(1)  | 9(1)   | 21(1)  | 8(1)   |
| C(8)   | 31(1)   | 57(1)  | 48(1)  | -1(1)  | 7(1)   | -6(1)  |
| C(9)   | 42(1)   | 66(1)  | 58(1)  | 1(1)   | 6(1)   | 4(1)   |
| C(10)  | 56(1)   | 75(1)  | 74(1)  | 9(1)   | 11(1)  | 20(1)  |
| C(11)  | 78(2)   | 67(1)  | 82(2)  | -3(1)  | 21(1)  | 21(1)  |
| C(12)  | 78(2)   | 75(2)  | 99(2)  | -33(1) | 7(1)   | 6(1)   |
| C(13)  | 50(1)   | 77(1)  | 74(1)  | -21(1) | -1(1)  | 8(1)   |
| C(14)  | 39(1)   | 56(1)  | 40(1)  | 2(1)   | 10(1)  | 1(1)   |
| C(15)  | 40(1)   | 56(1)  | 43(1)  | 7(1)   | 13(1)  | 2(1)   |
| C(16)  | 42(1)   | 137(2) | 84(2)  | 41(2)  | 7(1)   | -21(1) |
| C(17)  | 52(1)   | 80(1)  | 68(1)  | 10(1)  | 20(1)  | -15(1) |
| C(18)  | 47(2)   | 46(3)  | 48(3)  | -1(3)  | 22(2)  | -2(3)  |
| C(19)  | 68(3)   | 57(3)  | 60(3)  | 15(2)  | 22(2)  | 0(2)   |
| C(20)  | 82(5)   | 44(8)  | 53(6)  | -3(5)  | 13(4)  | -6(5)  |
| F(1)   | 368(11) | 185(7) | 81(4)  | 22(4)  | 109(5) | 67(7)  |
| F(2)   | 122(3)  | 163(5) | 111(4) | 90(4)  | 6(3)   | -17(4) |
| F(3)   | 170(10) | 152(8) | 125(7) | 74(6)  | 4(5)   | -91(7) |
| C(18') | 48(2)   | 44(3)  | 44(3)  | 0(2)   | 18(2)  | -2(2)  |
| C(19') | 63(3)   | 59(3)  | 46(2)  | -1(2)  | 18(2)  | -12(2) |
| C(20') | 108(6)  | 47(9)  | 56(7)  | 9(6)   | 24(5)  | -8(7)  |
| F(1')  | 121(3)  | 156(5) | 52(2)  | 14(2)  | 20(2)  | -36(3) |
| F(2')  | 194(6)  | 100(3) | 114(4) | 45(3)  | 77(4)  | 52(3)  |
| F(3')  | 87(3)   | 160(7) | 89(4)  | 34(4)  | 33(3)  | -39(4) |

Table S-crystal1-5. Hydrogen coordinates ( $\times 10^4$ ) and isotropic displacement parameters ( $\text{\AA}^2 \times 10^{-3}$ ) for Y.

---

|  | x | y | z | U(eq) |
|--|---|---|---|-------|
|--|---|---|---|-------|

---

|        |       |       |       |     |
|--------|-------|-------|-------|-----|
| H(5N)  | 10287 | 424   | 8836  | 66  |
| H(3)   | 7214  | -1144 | 6459  | 76  |
| H(4)   | 6704  | -2053 | 7941  | 94  |
| H(5)   | 5907  | -1837 | 10141 | 89  |
| H(6)   | 5650  | -713  | 10884 | 85  |
| H(7)   | 6147  | 202   | 9401  | 69  |
| H(9)   | 5239  | 772   | 5513  | 68  |
| H(10)  | 4540  | 1818  | 6021  | 83  |
| H(11)  | 5494  | 2610  | 7892  | 90  |
| H(12)  | 7159  | 2348  | 9319  | 104 |
| H(13)  | 7878  | 1305  | 8813  | 84  |
| H(16A) | 11889 | 528   | 8063  | 107 |
| H(16B) | 11620 | 1226  | 8896  | 107 |
| H(17A) | 11756 | 1116  | 5663  | 79  |
| H(17B) | 11248 | 1751  | 6380  | 79  |
| H(18)  | 10239 | 626   | 4395  | 54  |
| H(19A) | 9403  | 1966  | 4648  | 73  |
| H(19B) | 8738  | 1351  | 3646  | 73  |
| H(18') | 9899  | 1767  | 5755  | 53  |
| H(19C) | 9006  | 1041  | 3295  | 66  |
| H(19D) | 10109 | 803   | 3188  | 66  |

---

2)

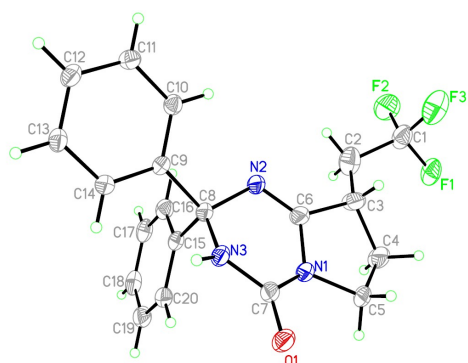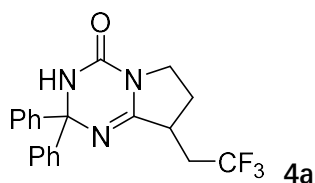

X-ray crystal structure of compound **4a**. Single crystal of **4a** was obtained by slow evaporation of Petroleum ether /EtOAc solution. Crystal measurement of **4a** was measured on R-Axis RAPID of Rigaku Corporation plus 291.2 k. Thermal ellipsoids are set at 40% probability.

**CCDC number:** 2341707



Table S-crystal2-1. Crystal data and structure refinement for 4a.

|                                   |                                                                 |          |
|-----------------------------------|-----------------------------------------------------------------|----------|
| Identification code               | Y                                                               |          |
| Empirical formula                 | C <sub>20</sub> H <sub>18</sub> F <sub>3</sub> N <sub>3</sub> O |          |
| Formula weight                    | 373.37                                                          |          |
| Temperature                       | 293(2) K                                                        |          |
| Wavelength                        | 0.71073 Å                                                       |          |
| Crystal system                    | Orthorhombic                                                    |          |
| Space group                       | Pbca                                                            |          |
| Unit cell dimensions              | a = 8.3452(5) Å                                                 | α = 90°. |
|                                   | b = 16.1586(8) Å                                                | β = 90°. |
|                                   | c = 26.0208(15) Å                                               | γ = 90°. |
| Volume                            | 3508.8(3) Å <sup>3</sup>                                        |          |
| Z                                 | 8                                                               |          |
| Density (calculated)              | 1.414 Mg/m <sup>3</sup>                                         |          |
| Absorption coefficient            | 0.111 mm <sup>-1</sup>                                          |          |
| F(000)                            | 1552                                                            |          |
| Crystal size                      | 0.180 x 0.170 x 0.150 mm <sup>3</sup>                           |          |
| Theta range for data collection   | 2.521 to 25.095°.                                               |          |
| Index ranges                      | -9 ≤ h ≤ 9, -19 ≤ k ≤ 19, -31 ≤ l ≤ 31                          |          |
| Reflections collected             | 62306                                                           |          |
| Independent reflections           | 3086 [R(int) = 0.1087]                                          |          |
| Completeness to theta = 25.095°   | 98.8 %                                                          |          |
| Max. and min. transmission        | 0.9835 and 0.9803                                               |          |
| Refinement method                 | Full-matrix least-squares on F <sup>2</sup>                     |          |
| Data / restraints / parameters    | 3086 / 0 / 215                                                  |          |
| Goodness-of-fit on F <sup>2</sup> | 1.056                                                           |          |
| Final R indices [I > 2σ(I)]       | R1 = 0.0978, wR2 = 0.2472                                       |          |
| R indices (all data)              | R1 = 0.1276, wR2 = 0.2955                                       |          |
| Extinction coefficient            | 0.0027(13)                                                      |          |
| Largest diff. peak and hole       | 1.732 and -0.744 e.Å <sup>-3</sup>                              |          |

Table S-crystal2-2. Atomic coordinates (x 10<sup>4</sup>) and equivalent isotropic displacement parameters (Å<sup>2</sup> x 10<sup>3</sup>) for Y. U(eq) is defined as one third of the trace of the orthogonalized U<sup>ij</sup> tensor.

|      | x        | y       | z       | U(eq) |
|------|----------|---------|---------|-------|
| O(1) | 3108(4)  | 5456(2) | -79(1)  | 43(1) |
| F(1) | -2613(4) | 6586(2) | 1848(1) | 64(1) |

|       |          |         |         |        |
|-------|----------|---------|---------|--------|
| F(2)  | -1770(7) | 6062(3) | 2536(2) | 100(2) |
| F(3)  | -568(5)  | 7088(3) | 2220(2) | 88(1)  |
| N(1)  | 1454(5)  | 5346(2) | 619(1)  | 38(1)  |
| N(2)  | 2381(5)  | 4821(3) | 1413(1) | 40(1)  |
| N(3)  | 3919(5)  | 4736(2) | 631(1)  | 34(1)  |
| C(1)  | -1294(8) | 6386(4) | 2102(2) | 62(2)  |
| C(2)  | -398(9)  | 5673(5) | 1838(3) | 72(2)  |
| C(3)  | 173(9)   | 5848(5) | 1349(2) | 84(3)  |
| C(4)  | -896(8)  | 5974(5) | 875(2)  | 67(2)  |
| C(5)  | 253(6)   | 5938(3) | 431(2)  | 44(1)  |
| C(6)  | 1443(6)  | 5273(3) | 1153(2) | 45(1)  |
| C(7)  | 2871(5)  | 5186(3) | 357(2)  | 36(1)  |
| C(8)  | 3475(5)  | 4304(3) | 1105(2) | 34(1)  |
| C(9)  | 5014(2)  | 4115(1) | 1403(1) | 32(1)  |
| C(10) | 5207(2)  | 4358(1) | 1912(1) | 34(1)  |
| C(11) | 6597(2)  | 4150(2) | 2176(1) | 37(1)  |
| C(12) | 7793(2)  | 3699(1) | 1932(1) | 39(1)  |
| C(13) | 7601(2)  | 3456(1) | 1424(1) | 38(1)  |
| C(14) | 6211(2)  | 3664(1) | 1159(1) | 38(1)  |
| C(15) | 2587(2)  | 3484(1) | 995(1)  | 34(1)  |
| C(16) | 1998(2)  | 3020(1) | 1409(1) | 42(1)  |
| C(17) | 1184(2)  | 2302(1) | 1334(1) | 48(1)  |
| C(18) | 892(2)   | 1999(1) | 829(1)  | 53(1)  |
| C(19) | 1481(2)  | 2451(2) | 411(1)  | 52(1)  |
| C(20) | 2342(2)  | 3195(1) | 495(1)  | 43(1)  |

Table S-crystal2-3. Bond lengths [Å] and angles [°] for Y.

|           |          |
|-----------|----------|
| O(1)-C(7) | 1.231(6) |
| F(1)-C(1) | 1.324(7) |
| F(2)-C(1) | 1.307(7) |
| F(3)-C(1) | 1.322(8) |
| N(1)-C(7) | 1.389(6) |
| N(1)-C(6) | 1.395(6) |
| N(1)-C(5) | 1.469(6) |
| N(2)-C(6) | 1.266(6) |
| N(2)-C(8) | 1.474(6) |

|             |          |
|-------------|----------|
| N(3)-C(7)   | 1.343(6) |
| N(3)-C(8)   | 1.464(6) |
| N(3)-H(3N)  | 0.8600   |
| C(1)-C(2)   | 1.535(9) |
| C(2)-C(3)   | 1.388(9) |
| C(2)-H(2A)  | 0.9700   |
| C(2)-H(2B)  | 0.9700   |
| C(3)-C(6)   | 1.499(7) |
| C(3)-C(4)   | 1.535(7) |
| C(3)-H(3)   | 0.9800   |
| C(4)-C(5)   | 1.503(8) |
| C(4)-H(4A)  | 0.9700   |
| C(4)-H(4B)  | 0.9700   |
| C(5)-H(5A)  | 0.9700   |
| C(5)-H(5B)  | 0.9700   |
| C(8)-C(9)   | 1.532(4) |
| C(8)-C(15)  | 1.545(5) |
| C(9)-C(10)  | 1.3900   |
| C(9)-C(14)  | 1.3900   |
| C(10)-C(11) | 1.3900   |
| C(10)-H(10) | 0.9300   |
| C(11)-C(12) | 1.3900   |
| C(11)-H(11) | 0.9300   |
| C(12)-C(13) | 1.3900   |
| C(12)-H(12) | 0.9300   |
| C(13)-C(14) | 1.3900   |
| C(13)-H(13) | 0.9300   |
| C(14)-H(14) | 0.9300   |
| C(15)-C(20) | 1.3970   |
| C(15)-C(16) | 1.4028   |
| C(16)-C(17) | 1.3600   |
| C(16)-H(16) | 0.9300   |
| C(17)-C(18) | 1.4244   |
| C(17)-H(17) | 0.9300   |
| C(18)-C(19) | 1.3987   |
| C(18)-H(18) | 0.9300   |
| C(19)-C(20) | 1.4175   |
| C(19)-H(19) | 0.9300   |

|                  |          |
|------------------|----------|
| C(20)-H(20)      | 0.9300   |
| C(7)-N(1)-C(6)   | 118.6(4) |
| C(7)-N(1)-C(5)   | 122.6(4) |
| C(6)-N(1)-C(5)   | 112.4(4) |
| C(6)-N(2)-C(8)   | 114.7(4) |
| C(7)-N(3)-C(8)   | 122.7(4) |
| C(7)-N(3)-H(3N)  | 118.6    |
| C(8)-N(3)-H(3N)  | 118.6    |
| F(2)-C(1)-F(3)   | 106.5(5) |
| F(2)-C(1)-F(1)   | 106.0(5) |
| F(3)-C(1)-F(1)   | 106.7(5) |
| F(2)-C(1)-C(2)   | 103.6(5) |
| F(3)-C(1)-C(2)   | 121.6(6) |
| F(1)-C(1)-C(2)   | 111.4(6) |
| C(3)-C(2)-C(1)   | 115.2(6) |
| C(3)-C(2)-H(2A)  | 108.5    |
| C(1)-C(2)-H(2A)  | 108.5    |
| C(3)-C(2)-H(2B)  | 108.5    |
| C(1)-C(2)-H(2B)  | 108.5    |
| H(2A)-C(2)-H(2B) | 107.5    |
| C(2)-C(3)-C(6)   | 115.4(6) |
| C(2)-C(3)-C(4)   | 124.3(7) |
| C(6)-C(3)-C(4)   | 102.7(4) |
| C(2)-C(3)-H(3)   | 104.1    |
| C(6)-C(3)-H(3)   | 104.1    |
| C(4)-C(3)-H(3)   | 104.1    |
| C(5)-C(4)-C(3)   | 104.0(5) |
| C(5)-C(4)-H(4A)  | 111.0    |
| C(3)-C(4)-H(4A)  | 111.0    |
| C(5)-C(4)-H(4B)  | 111.0    |
| C(3)-C(4)-H(4B)  | 111.0    |
| H(4A)-C(4)-H(4B) | 109.0    |
| N(1)-C(5)-C(4)   | 101.9(4) |
| N(1)-C(5)-H(5A)  | 111.4    |
| C(4)-C(5)-H(5A)  | 111.4    |
| N(1)-C(5)-H(5B)  | 111.4    |
| C(4)-C(5)-H(5B)  | 111.4    |

|                   |            |
|-------------------|------------|
| H(5A)-C(5)-H(5B)  | 109.3      |
| N(2)-C(6)-N(1)    | 125.3(4)   |
| N(2)-C(6)-C(3)    | 127.8(5)   |
| N(1)-C(6)-C(3)    | 106.9(4)   |
| O(1)-C(7)-N(3)    | 125.2(4)   |
| O(1)-C(7)-N(1)    | 121.5(4)   |
| N(3)-C(7)-N(1)    | 113.2(4)   |
| N(3)-C(8)-N(2)    | 110.2(3)   |
| N(3)-C(8)-C(9)    | 108.0(3)   |
| N(2)-C(8)-C(9)    | 110.9(3)   |
| N(3)-C(8)-C(15)   | 111.9(3)   |
| N(2)-C(8)-C(15)   | 106.8(3)   |
| C(9)-C(8)-C(15)   | 108.9(3)   |
| C(10)-C(9)-C(14)  | 120.0      |
| C(10)-C(9)-C(8)   | 121.54(18) |
| C(14)-C(9)-C(8)   | 118.43(18) |
| C(9)-C(10)-C(11)  | 120.0      |
| C(9)-C(10)-H(10)  | 120.0      |
| C(11)-C(10)-H(10) | 120.0      |
| C(12)-C(11)-C(10) | 120.0      |
| C(12)-C(11)-H(11) | 120.0      |
| C(10)-C(11)-H(11) | 120.0      |
| C(11)-C(12)-C(13) | 120.0      |
| C(11)-C(12)-H(12) | 120.0      |
| C(13)-C(12)-H(12) | 120.0      |
| C(14)-C(13)-C(12) | 120.0      |
| C(14)-C(13)-H(13) | 120.0      |
| C(12)-C(13)-H(13) | 120.0      |
| C(13)-C(14)-C(9)  | 120.0      |
| C(13)-C(14)-H(14) | 120.0      |
| C(9)-C(14)-H(14)  | 120.0      |
| C(20)-C(15)-C(16) | 119.1      |
| C(20)-C(15)-C(8)  | 121.99(18) |
| C(16)-C(15)-C(8)  | 118.93(18) |
| C(17)-C(16)-C(15) | 121.4      |
| C(17)-C(16)-H(16) | 119.3      |
| C(15)-C(16)-H(16) | 119.3      |
| C(16)-C(17)-C(18) | 120.8      |

|                   |       |
|-------------------|-------|
| C(16)-C(17)-H(17) | 119.6 |
| C(18)-C(17)-H(17) | 119.6 |
| C(19)-C(18)-C(17) | 118.5 |
| C(19)-C(18)-H(18) | 120.8 |
| C(17)-C(18)-H(18) | 120.8 |
| C(18)-C(19)-C(20) | 120.2 |
| C(18)-C(19)-H(19) | 119.9 |
| C(20)-C(19)-H(19) | 119.9 |
| C(15)-C(20)-C(19) | 120.1 |
| C(15)-C(20)-H(20) | 120.0 |
| C(19)-C(20)-H(20) | 120.0 |

---

Symmetry transformations used to generate equivalent atoms:

Table S-crystal2-4. Anisotropic displacement parameters ( $\text{\AA}^2 \times 10^3$ ) for Y. The anisotropic displacement factor exponent takes the form:  $-2\pi^2 [ h^2 a^{*2} U^{11} + \dots + 2 h k a^* b^* U^{12} ]$

---

|       | U <sup>11</sup> | U <sup>22</sup> | U <sup>33</sup> | U <sup>23</sup> | U <sup>13</sup> | U <sup>12</sup> |
|-------|-----------------|-----------------|-----------------|-----------------|-----------------|-----------------|
| O(1)  | 40(2)           | 48(2)           | 40(2)           | 6(2)            | -6(1)           | 7(2)            |
| F(1)  | 50(2)           | 70(2)           | 71(2)           | 14(2)           | 17(2)           | 27(2)           |
| F(2)  | 160(4)          | 71(2)           | 69(2)           | 24(2)           | -11(3)          | -4(3)           |
| F(3)  | 61(2)           | 84(3)           | 119(3)          | 35(3)           | 0(2)            | 4(2)            |
| N(1)  | 35(2)           | 42(2)           | 36(2)           | -1(2)           | -6(2)           | 11(2)           |
| N(2)  | 38(2)           | 50(2)           | 33(2)           | -3(2)           | -1(2)           | 18(2)           |
| N(3)  | 32(2)           | 36(2)           | 36(2)           | 4(2)            | -3(2)           | 7(2)            |
| C(1)  | 68(4)           | 71(4)           | 47(3)           | 10(3)           | 13(3)           | 32(3)           |
| C(2)  | 63(4)           | 67(4)           | 87(5)           | 6(3)            | 6(3)            | 17(3)           |
| C(3)  | 89(5)           | 124(6)          | 38(3)           | -28(3)          | -18(3)          | 79(5)           |
| C(4)  | 63(4)           | 88(5)           | 50(3)           | -5(3)           | -10(3)          | 46(3)           |
| C(5)  | 39(3)           | 43(3)           | 49(3)           | -2(2)           | -15(2)          | 17(2)           |
| C(6)  | 43(3)           | 56(3)           | 36(2)           | -6(2)           | -7(2)           | 17(2)           |
| C(7)  | 36(2)           | 34(2)           | 39(2)           | -4(2)           | -9(2)           | 5(2)            |
| C(8)  | 34(2)           | 38(2)           | 31(2)           | -1(2)           | -1(2)           | 10(2)           |
| C(9)  | 30(2)           | 33(2)           | 33(2)           | 1(2)            | -5(2)           | 5(2)            |
| C(10) | 31(2)           | 37(2)           | 35(2)           | 1(2)            | 2(2)            | 4(2)            |
| C(11) | 35(2)           | 41(2)           | 34(2)           | -1(2)           | -4(2)           | -1(2)           |
| C(12) | 32(2)           | 39(2)           | 46(3)           | 3(2)            | -8(2)           | 2(2)            |

|       |       |       |       |        |        |       |
|-------|-------|-------|-------|--------|--------|-------|
| C(13) | 32(2) | 39(2) | 43(2) | 0(2)   | 1(2)   | 9(2)  |
| C(14) | 39(2) | 43(3) | 31(2) | -4(2)  | -3(2)  | 10(2) |
| C(15) | 26(2) | 36(2) | 39(2) | 1(2)   | -4(2)  | 8(2)  |
| C(16) | 31(2) | 48(3) | 47(3) | 3(2)   | 2(2)   | 6(2)  |
| C(17) | 28(2) | 49(3) | 67(3) | 9(2)   | 3(2)   | 8(2)  |
| C(18) | 39(3) | 37(3) | 83(4) | 1(3)   | -9(3)  | 7(2)  |
| C(19) | 57(3) | 40(3) | 59(3) | -10(2) | -16(3) | 9(2)  |
| C(20) | 51(3) | 34(2) | 45(3) | -3(2)  | -8(2)  | 9(2)  |

Table S-crystal2-5. Hydrogen coordinates ( $\times 10^4$ ) and isotropic displacement parameters ( $\text{\AA}^2 \times 10^{-3}$ ) for Y.

|       | x     | y    | z    | U(eq) |
|-------|-------|------|------|-------|
| H(3N) | 4891  | 4700 | 524  | 41    |
| H(2A) | 501   | 5515 | 2053 | 87    |
| H(2B) | -1111 | 5201 | 1817 | 87    |
| H(3)  | 728   | 6378 | 1389 | 101   |
| H(4A) | -1695 | 5540 | 850  | 80    |
| H(4B) | -1434 | 6506 | 889  | 80    |
| H(5A) | -268  | 5739 | 122  | 52    |
| H(5B) | 727   | 6476 | 364  | 52    |
| H(10) | 4406  | 4660 | 2075 | 41    |
| H(11) | 6726  | 4312 | 2517 | 44    |
| H(12) | 8723  | 3560 | 2109 | 47    |
| H(13) | 8401  | 3154 | 1260 | 46    |
| H(14) | 6082  | 3501 | 819  | 45    |
| H(16) | 2169  | 3208 | 1743 | 50    |
| H(17) | 813   | 2004 | 1616 | 57    |
| H(18) | 321   | 1511 | 777  | 64    |
| H(19) | 1308  | 2263 | 78   | 63    |
| H(20) | 2745  | 3491 | 217  | 52    |

3)

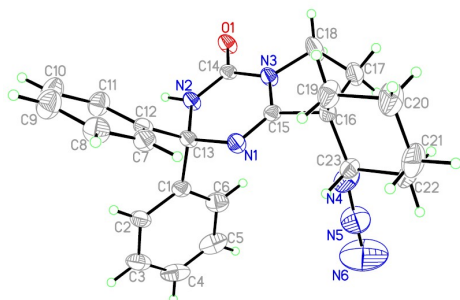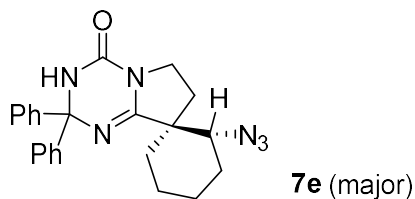

X-ray crystal structure of compound **7e** (major). Single crystal of **7e** was obtained by slow evaporation of Petroleum ether /EtOAc solution. Crystal measurement of **7e** was measured on R-Axis RAPID of Rigaku Corporation plus 291.2 k. Thermal ellipsoids are set at 30% probability.

**CCDC number:** 2341708

Table S-crystal3-1. Crystal data and structure refinement for **7e**.

|                                   |                                                  |                 |
|-----------------------------------|--------------------------------------------------|-----------------|
| Identification code               | YY                                               |                 |
| Empirical formula                 | C <sub>23</sub> H <sub>24</sub> N <sub>6</sub> O |                 |
| Formula weight                    | 400.48                                           |                 |
| Temperature                       | 296(2) K                                         |                 |
| Wavelength                        | 0.71073 Å                                        |                 |
| Crystal system                    | Monoclinic                                       |                 |
| Space group                       | C <sub>2/c</sub>                                 |                 |
| Unit cell dimensions              | a = 12.6779(12) Å                                | α = 90°.        |
|                                   | b = 15.4791(12) Å                                | β = 96.233(5)°. |
|                                   | c = 21.483(2) Å                                  | γ = 90°.        |
| Volume                            | 4190.9(6) Å <sup>3</sup>                         |                 |
| Z                                 | 8                                                |                 |
| Density (calculated)              | 1.269 Mg/m <sup>3</sup>                          |                 |
| Absorption coefficient            | 0.082 mm <sup>-1</sup>                           |                 |
| F(000)                            | 1696                                             |                 |
| Crystal size                      | 0.200 x 0.180 x 0.170 mm <sup>3</sup>            |                 |
| Theta range for data collection   | 2.632 to 27.562°.                                |                 |
| Index ranges                      | -16 ≤ h ≤ 16, -20 ≤ k ≤ 20, -27 ≤ l ≤ 27         |                 |
| Reflections collected             | 89621                                            |                 |
| Independent reflections           | 4839 [R(int) = 0.0583]                           |                 |
| Completeness to theta = 25.242°   | 99.9 %                                           |                 |
| Absorption correction             | Semi-empirical from equivalents                  |                 |
| Max. and min. transmission        | 0.9862 and 0.9838                                |                 |
| Refinement method                 | Full-matrix least-squares on F <sup>2</sup>      |                 |
| Data / restraints / parameters    | 4839 / 0 / 241                                   |                 |
| Goodness-of-fit on F <sup>2</sup> | 1.049                                            |                 |



|                                      |                                    |
|--------------------------------------|------------------------------------|
| Final R indices [ $I > 2\sigma(I)$ ] | R1 = 0.0596, wR2 = 0.1525          |
| R indices (all data)                 | R1 = 0.0792, wR2 = 0.1658          |
| Extinction coefficient               | n/a                                |
| Largest diff. peak and hole          | 0.221 and -0.220 e.Å <sup>-3</sup> |

Table S-crystal3-2. Atomic coordinates ( $\times 10^4$ ) and equivalent isotropic displacement parameters ( $\text{Å}^2 \times 10^3$ ) for YY.  $U(\text{eq})$  is defined as one third of the trace of the orthogonalized  $U^{ij}$  tensor.

|       | x       | y       | z       | U(eq)  |
|-------|---------|---------|---------|--------|
| C(1)  | 5443(1) | 3315(1) | 5502(1) | 42(1)  |
| C(2)  | 5905(1) | 3978(1) | 5189(1) | 52(1)  |
| C(3)  | 6202(1) | 4741(1) | 5501(1) | 69(1)  |
| C(4)  | 6037(1) | 4841(1) | 6126(1) | 77(1)  |
| C(5)  | 5575(1) | 4179(1) | 6439(1) | 77(1)  |
| C(6)  | 5278(1) | 3416(1) | 6127(1) | 61(1)  |
| C(7)  | 5446(1) | 2399(1) | 4514(1) | 41(1)  |
| C(8)  | 6417(1) | 2073(1) | 4388(1) | 50(1)  |
| C(9)  | 6704(1) | 2072(1) | 3785(1) | 62(1)  |
| C(10) | 6009(1) | 2373(1) | 3295(1) | 71(1)  |
| C(11) | 5041(1) | 2706(1) | 3408(1) | 75(1)  |
| C(12) | 4749(1) | 2718(1) | 4024(1) | 58(1)  |
| C(13) | 5159(1) | 2434(1) | 5188(1) | 38(1)  |
| C(14) | 3544(1) | 1640(1) | 5471(1) | 36(1)  |
| C(15) | 5321(1) | 1186(1) | 5812(1) | 35(1)  |
| C(16) | 5879(1) | 474(1)  | 6207(1) | 39(1)  |
| C(17) | 4956(2) | -10(2)  | 6464(1) | 64(1)  |
| C(18) | 3938(2) | 305(2)  | 6120(1) | 66(1)  |
| C(19) | 6516(2) | -95(2)  | 5797(1) | 63(1)  |
| C(20) | 7192(2) | -765(2) | 6181(1) | 79(1)  |
| C(21) | 7929(2) | -333(2) | 6687(1) | 78(1)  |
| C(22) | 7315(2) | 221(2)  | 7108(1) | 65(1)  |
| C(23) | 6653(2) | 886(1)  | 6717(1) | 45(1)  |
| N(1)  | 5788(1) | 1783(1) | 5556(1) | 44(1)  |
| N(2)  | 3999(1) | 2293(1) | 5199(1) | 45(1)  |
| N(3)  | 4241(1) | 1065(1) | 5779(1) | 44(1)  |
| N(4)  | 6014(2) | 1433(2) | 7101(1) | 77(1)  |
| N(5)  | 6491(3) | 1890(2) | 7482(1) | 100(1) |

|      |         |         |         |        |
|------|---------|---------|---------|--------|
| N(6) | 6845(5) | 2330(3) | 7863(2) | 201(2) |
| O(1) | 2579(1) | 1546(1) | 5457(1) | 51(1)  |

---

Table S-crystal3-3. Bond lengths [Å] and angles [°] for YY.

---

|             |          |
|-------------|----------|
| C(1)-C(2)   | 1.3900   |
| C(1)-C(6)   | 1.3900   |
| C(1)-C(13)  | 1.546(2) |
| C(2)-C(3)   | 1.3900   |
| C(3)-C(4)   | 1.3900   |
| C(4)-C(5)   | 1.3900   |
| C(5)-C(6)   | 1.3900   |
| C(7)-C(8)   | 1.3845   |
| C(7)-C(12)  | 1.3895   |
| C(7)-C(13)  | 1.532(2) |
| C(8)-C(9)   | 1.3829   |
| C(9)-C(10)  | 1.3779   |
| C(10)-C(11) | 1.3765   |
| C(11)-C(12) | 1.4137   |
| C(13)-N(1)  | 1.463(2) |
| C(13)-N(2)  | 1.489(2) |
| C(14)-O(1)  | 1.229(2) |
| C(14)-N(2)  | 1.330(2) |
| C(14)-N(3)  | 1.373(2) |
| C(15)-N(1)  | 1.256(2) |
| C(15)-N(3)  | 1.377(2) |
| C(15)-C(16) | 1.517(2) |
| C(16)-C(23) | 1.529(3) |
| C(16)-C(19) | 1.535(3) |
| C(16)-C(17) | 1.542(3) |
| C(17)-C(18) | 1.497(3) |
| C(18)-N(3)  | 1.459(2) |
| C(19)-C(20) | 1.529(3) |
| C(20)-C(21) | 1.509(4) |
| C(21)-C(22) | 1.520(4) |
| C(22)-C(23) | 1.521(3) |
| C(23)-N(4)  | 1.482(3) |

|                   |            |
|-------------------|------------|
| N(4)-N(5)         | 1.196(3)   |
| N(5)-N(6)         | 1.120(4)   |
| C(2)-C(1)-C(6)    | 120.0      |
| C(2)-C(1)-C(13)   | 122.04(7)  |
| C(6)-C(1)-C(13)   | 117.86(7)  |
| C(1)-C(2)-C(3)    | 120.0      |
| C(2)-C(3)-C(4)    | 120.0      |
| C(5)-C(4)-C(3)    | 120.0      |
| C(4)-C(5)-C(6)    | 120.0      |
| C(5)-C(6)-C(1)    | 120.0      |
| C(8)-C(7)-C(12)   | 119.2      |
| C(8)-C(7)-C(13)   | 120.37(7)  |
| C(12)-C(7)-C(13)  | 120.44(7)  |
| C(9)-C(8)-C(7)    | 120.9      |
| C(10)-C(9)-C(8)   | 120.3      |
| C(11)-C(10)-C(9)  | 120.0      |
| C(10)-C(11)-C(12) | 119.9      |
| C(7)-C(12)-C(11)  | 119.7      |
| N(1)-C(13)-N(2)   | 111.82(13) |
| N(1)-C(13)-C(7)   | 108.33(13) |
| N(2)-C(13)-C(7)   | 110.26(13) |
| N(1)-C(13)-C(1)   | 106.58(13) |
| N(2)-C(13)-C(1)   | 107.79(13) |
| C(7)-C(13)-C(1)   | 112.03(11) |
| O(1)-C(14)-N(2)   | 123.86(16) |
| O(1)-C(14)-N(3)   | 121.46(16) |
| N(2)-C(14)-N(3)   | 114.67(14) |
| N(1)-C(15)-N(3)   | 126.25(15) |
| N(1)-C(15)-C(16)  | 124.43(15) |
| N(3)-C(15)-C(16)  | 109.32(14) |
| C(15)-C(16)-C(23) | 108.79(14) |
| C(15)-C(16)-C(19) | 109.78(15) |
| C(23)-C(16)-C(19) | 108.28(16) |
| C(15)-C(16)-C(17) | 103.12(14) |
| C(23)-C(16)-C(17) | 113.46(17) |
| C(19)-C(16)-C(17) | 113.23(19) |
| C(18)-C(17)-C(16) | 108.18(17) |

|                   |            |
|-------------------|------------|
| N(3)-C(18)-C(17)  | 104.52(16) |
| C(20)-C(19)-C(16) | 112.25(18) |
| C(21)-C(20)-C(19) | 110.7(2)   |
| C(20)-C(21)-C(22) | 111.2(2)   |
| C(21)-C(22)-C(23) | 109.91(18) |
| N(4)-C(23)-C(22)  | 112.46(18) |
| N(4)-C(23)-C(16)  | 106.86(16) |
| C(22)-C(23)-C(16) | 112.67(17) |
| C(15)-N(1)-C(13)  | 119.22(14) |
| C(14)-N(2)-C(13)  | 126.50(14) |
| C(14)-N(3)-C(15)  | 121.39(14) |
| C(14)-N(3)-C(18)  | 125.09(15) |
| C(15)-N(3)-C(18)  | 113.48(15) |
| N(5)-N(4)-C(23)   | 117.0(2)   |
| N(6)-N(5)-N(4)    | 173.2(4)   |

---

Symmetry transformations used to generate equivalent atoms:

Table S-crystal3-4. Anisotropic displacement parameters ( $\text{\AA}^2 \times 10^3$ ) for YY. The anisotropic displacement factor exponent takes the form:  $-2\pi^2 [ h^2 a^{*2} U^{11} + \dots + 2 h k a^* b^* U^{12} ]$

---

|       | U <sup>11</sup> | U <sup>22</sup> | U <sup>33</sup> | U <sup>23</sup> | U <sup>13</sup> | U <sup>12</sup> |
|-------|-----------------|-----------------|-----------------|-----------------|-----------------|-----------------|
| C(1)  | 24(1)           | 43(1)           | 58(1)           | 4(1)            | -4(1)           | 1(1)            |
| C(2)  | 42(1)           | 42(1)           | 71(1)           | 7(1)            | -6(1)           | -8(1)           |
| C(3)  | 51(1)           | 45(1)           | 105(2)          | 2(1)            | -14(1)          | -10(1)          |
| C(4)  | 46(1)           | 61(2)           | 119(2)          | -31(2)          | -12(1)          | 5(1)            |
| C(5)  | 54(1)           | 95(2)           | 82(2)           | -33(2)          | 3(1)            | 8(1)            |
| C(6)  | 47(1)           | 70(2)           | 68(1)           | -7(1)           | 11(1)           | -4(1)           |
| C(7)  | 33(1)           | 32(1)           | 55(1)           | 4(1)            | -1(1)           | -3(1)           |
| C(8)  | 35(1)           | 53(1)           | 60(1)           | 7(1)            | 1(1)            | 0(1)            |
| C(9)  | 46(1)           | 73(2)           | 68(1)           | 2(1)            | 13(1)           | 2(1)            |
| C(10) | 66(2)           | 92(2)           | 55(1)           | 2(1)            | 11(1)           | 4(1)            |
| C(11) | 67(2)           | 101(2)          | 54(1)           | 11(1)           | -5(1)           | 18(1)           |
| C(12) | 46(1)           | 68(1)           | 58(1)           | 7(1)            | -2(1)           | 12(1)           |
| C(13) | 23(1)           | 36(1)           | 55(1)           | 10(1)           | -1(1)           | -1(1)           |
| C(14) | 27(1)           | 32(1)           | 47(1)           | 1(1)            | 0(1)            | -1(1)           |
| C(15) | 28(1)           | 34(1)           | 40(1)           | 0(1)            | -2(1)           | 1(1)            |

|       |        |        |        |         |        |        |
|-------|--------|--------|--------|---------|--------|--------|
| C(16) | 36(1)  | 36(1)  | 42(1)  | 4(1)    | -2(1)  | 2(1)   |
| C(17) | 46(1)  | 60(1)  | 83(2)  | 34(1)   | -7(1)  | -9(1)  |
| C(18) | 42(1)  | 57(1)  | 100(2) | 39(1)   | 4(1)   | -4(1)  |
| C(19) | 79(2)  | 54(1)  | 52(1)  | -4(1)   | -3(1)  | 29(1)  |
| C(20) | 95(2)  | 65(2)  | 76(2)  | 0(1)    | 0(1)   | 45(2)  |
| C(21) | 58(1)  | 87(2)  | 85(2)  | 21(2)   | -1(1)  | 35(1)  |
| C(22) | 58(1)  | 79(2)  | 52(1)  | 8(1)    | -14(1) | 12(1)  |
| C(23) | 41(1)  | 49(1)  | 43(1)  | -1(1)   | -2(1)  | 5(1)   |
| N(1)  | 26(1)  | 44(1)  | 62(1)  | 15(1)   | -1(1)  | 2(1)   |
| N(2)  | 23(1)  | 41(1)  | 68(1)  | 19(1)   | -2(1)  | -1(1)  |
| N(3)  | 29(1)  | 39(1)  | 63(1)  | 15(1)   | -1(1)  | -2(1)  |
| N(4)  | 83(2)  | 92(2)  | 56(1)  | -22(1)  | 1(1)   | 22(1)  |
| N(5)  | 137(2) | 85(2)  | 77(2)  | -33(2)  | 15(2)  | -2(2)  |
| N(6)  | 234(5) | 190(5) | 178(4) | -133(4) | 28(4)  | -40(4) |
| O(1)  | 26(1)  | 46(1)  | 81(1)  | 17(1)   | 2(1)   | -2(1)  |

Table S-crystal3-5. Hydrogen coordinates ( $\times 10^4$ ) and isotropic displacement parameters ( $\text{\AA}^2 \times 10^{-3}$ ) for YY.

|        | x    | y    | z    | U(eq) |
|--------|------|------|------|-------|
| H(2)   | 6015 | 3911 | 4771 | 63    |
| H(3)   | 6511 | 5184 | 5292 | 82    |
| H(4)   | 6236 | 5352 | 6335 | 92    |
| H(5)   | 5464 | 4246 | 6857 | 93    |
| H(6)   | 4968 | 2972 | 6336 | 73    |
| H(8)   | 6883 | 1852 | 4713 | 60    |
| H(9)   | 7368 | 1868 | 3710 | 74    |
| H(10)  | 6194 | 2350 | 2888 | 85    |
| H(11)  | 4580 | 2923 | 3079 | 90    |
| H(12)  | 4093 | 2937 | 4101 | 70    |
| H(17A) | 5029 | -627 | 6404 | 77    |
| H(17B) | 4962 | 101  | 6909 | 77    |
| H(18A) | 3627 | -133 | 5834 | 80    |
| H(18B) | 3432 | 456  | 6410 | 80    |
| H(19A) | 6031 | -389 | 5488 | 75    |
| H(19B) | 6975 | 269  | 5576 | 75    |

|        |      |       |      |    |
|--------|------|-------|------|----|
| H(20A) | 6733 | -1166 | 6371 | 95 |
| H(20B) | 7605 | -1091 | 5908 | 95 |
| H(21A) | 8431 | 26    | 6495 | 93 |
| H(21B) | 8326 | -770  | 6937 | 93 |
| H(22A) | 7805 | 512   | 7416 | 77 |
| H(22B) | 6854 | -143  | 7328 | 77 |
| H(23)  | 7136 | 1262  | 6515 | 54 |
| H(2N)  | 3516 | 2693  | 4983 | 54 |

---

## **IX. NMR Spectral Copies**

9xjm54ew. 1. fid

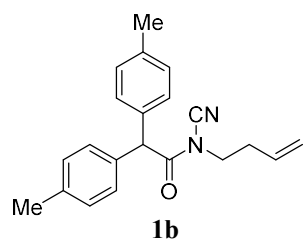

$^1\text{H}$  NMR (400 MHz,  $\text{CDCl}_3$ )

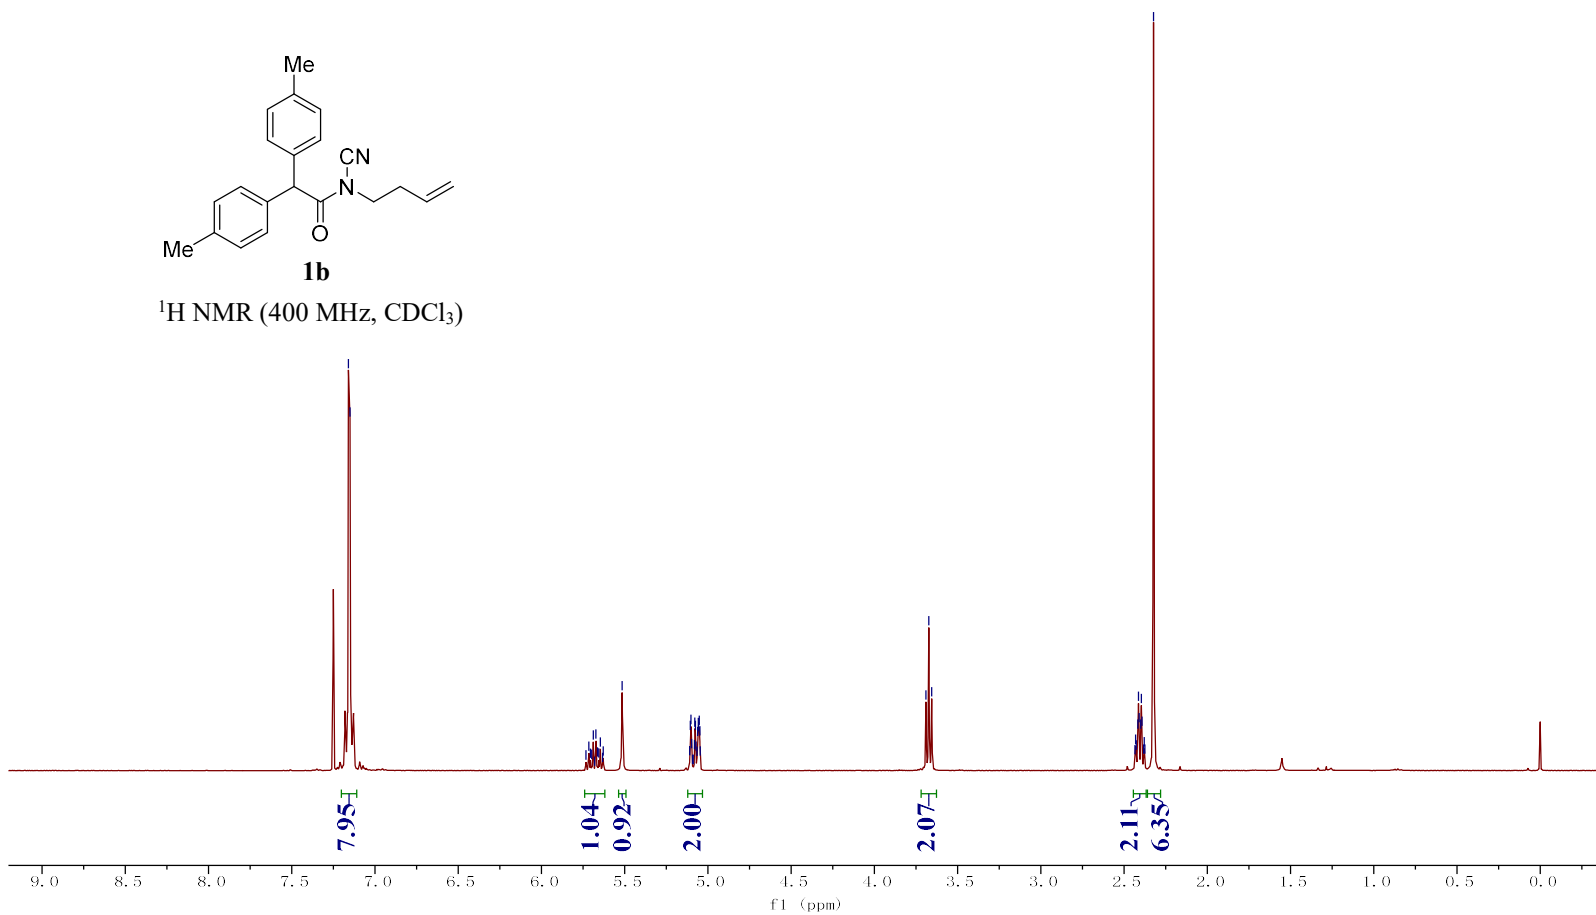



9xjm54ew-e. 2. fid

— 171.90  
— 137.69  
— 134.15  
— 132.81  
— 129.64  
— 128.73  
— 118.99  
— 110.57  
— 55.43  
— 46.09  
— 32.04  
— 21.21

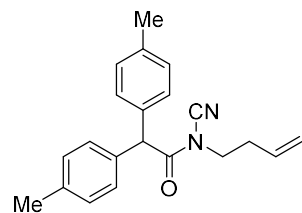

**1b**

$^{13}\text{C}$  NMR (100 MHz,  $\text{CDCl}_3$ )

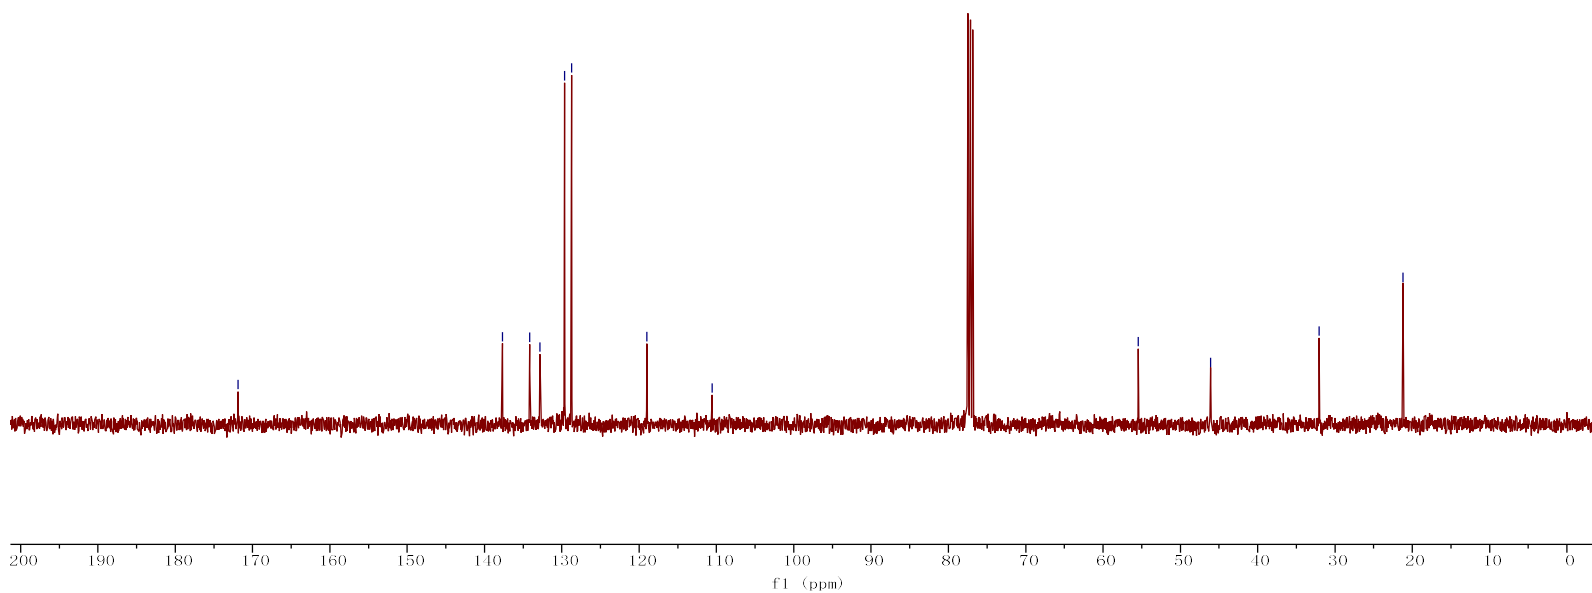

9xjm55a.1

7.50  
7.49  
7.49  
7.48  
7.47  
7.47  
7.16  
7.15  
7.15  
7.14  
7.13  
7.13  
5.72  
5.70  
5.69  
5.69  
5.68  
5.66  
5.65  
5.64  
5.64  
5.62  
5.49  
5.10  
5.10  
5.09  
5.08  
5.08  
5.08  
5.07  
5.06  
5.05  
5.05  
3.71  
3.69  
3.68  
2.44  
2.44  
2.44  
2.43  
2.42  
2.42  
2.41  
2.41  
2.40  
2.39  
2.39  
2.38

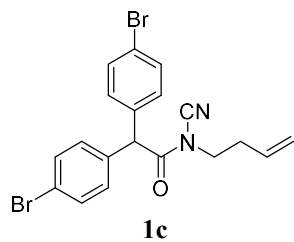

<sup>1</sup>H NMR (400 MHz, CDCl<sub>3</sub>)

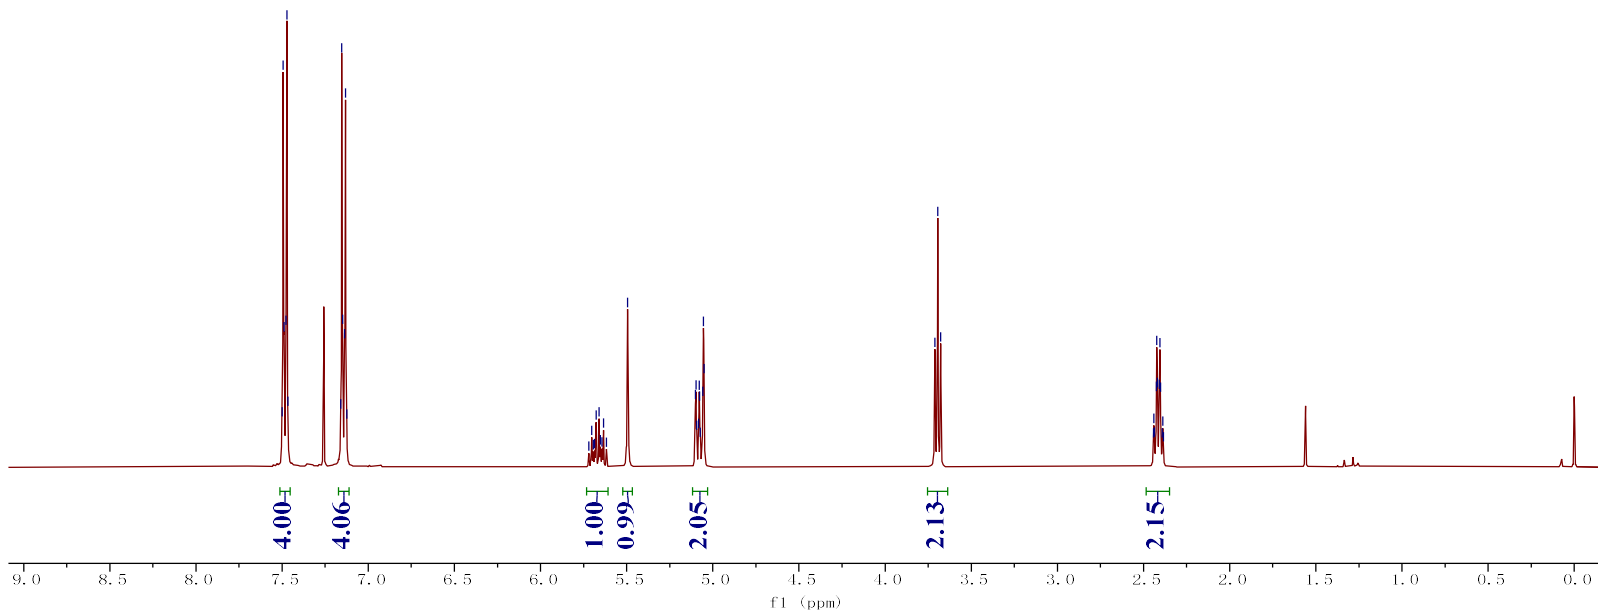

9xjm55a-e.3. fid

— 170.79

— 135.44

— 132.61

— 132.27

— 130.50

— 122.51

— 119.23

— 110.18

— 54.81

— 46.15

— 32.00

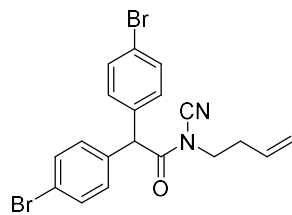

**1c**

<sup>13</sup>C NMR (100 MHz, CDCl<sub>3</sub>)

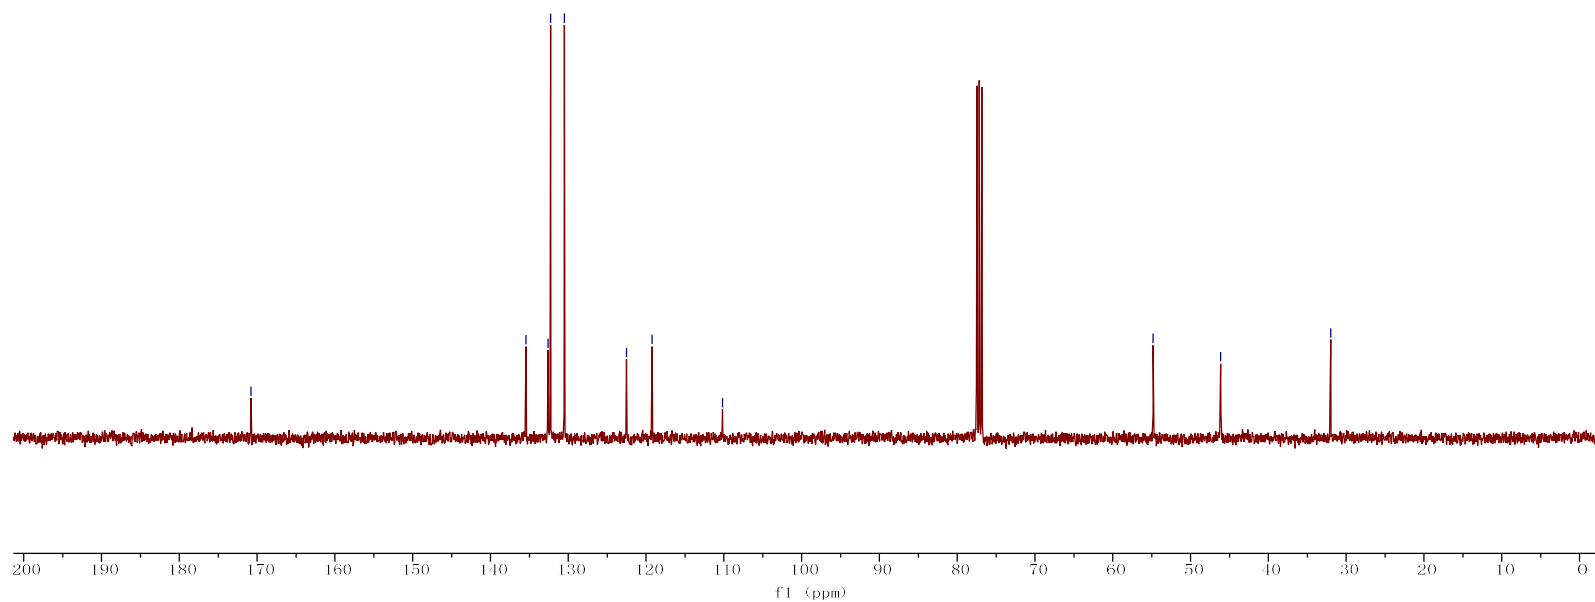

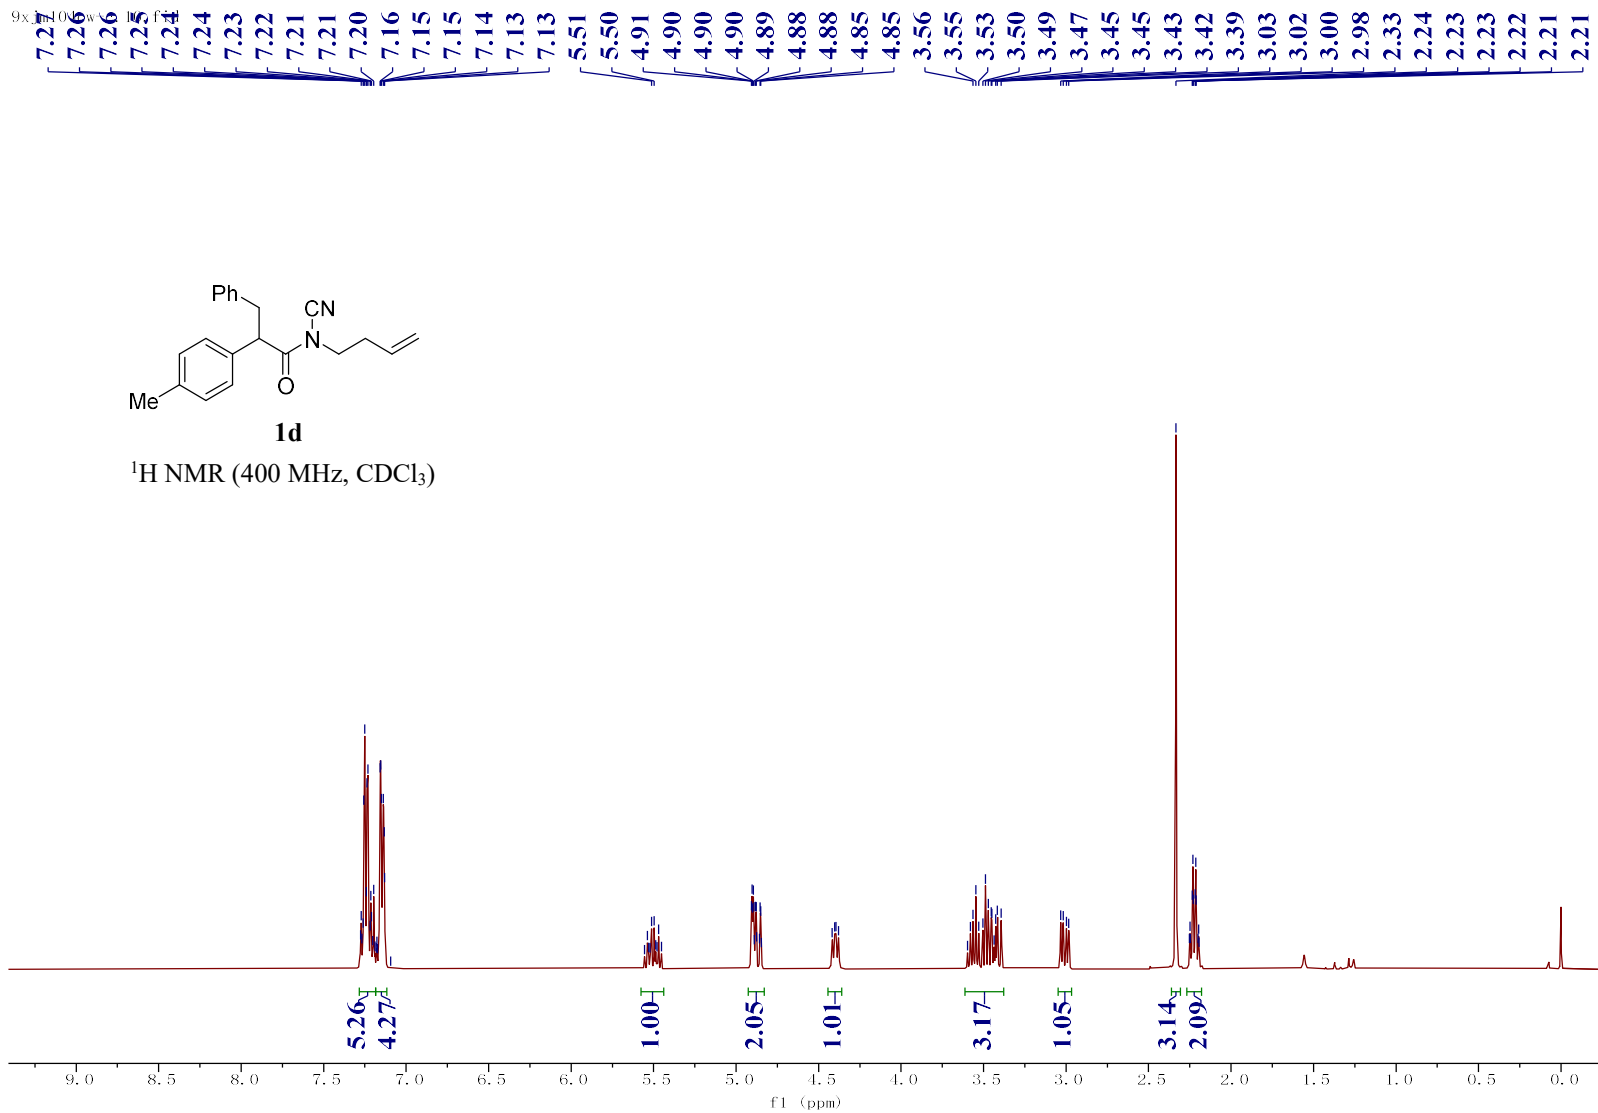

9xjm104ew-c. 11. fid

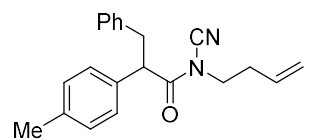

**1d**

$^{13}\text{C}$  NMR (100 MHz,  $\text{CDCl}_3$ )

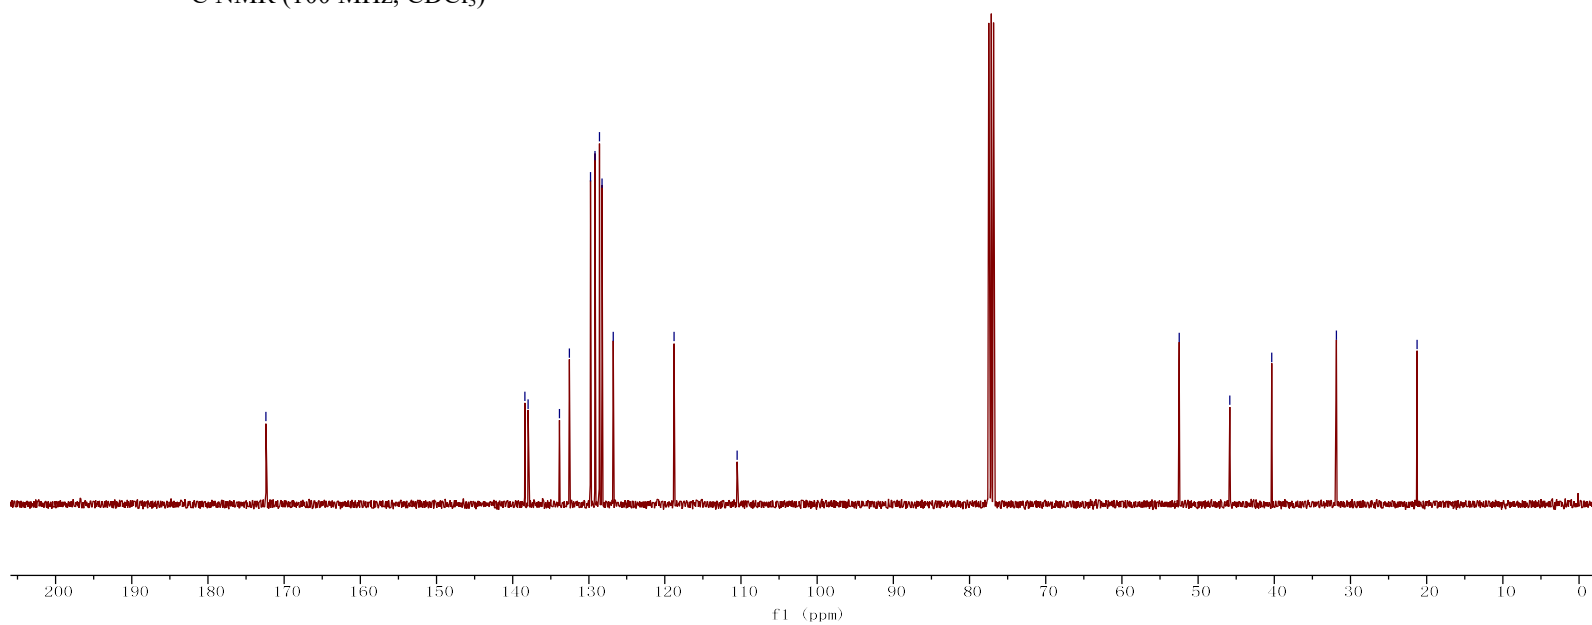

11x\_jm65

7.36  
7.35  
7.35  
7.35  
7.34  
7.33  
7.33  
7.32  
7.32  
7.31  
7.30  
7.30  
7.29  
5.79  
5.79  
5.76  
5.76  
5.75  
5.74  
5.72  
5.72  
5.66  
5.02  
5.02  
5.01  
4.99  
4.99  
4.98  
4.98  
4.94  
4.94  
3.53

— 1.04

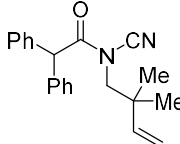

**1r**

<sup>1</sup>H NMR (400 MHz, CDCl<sub>3</sub>)

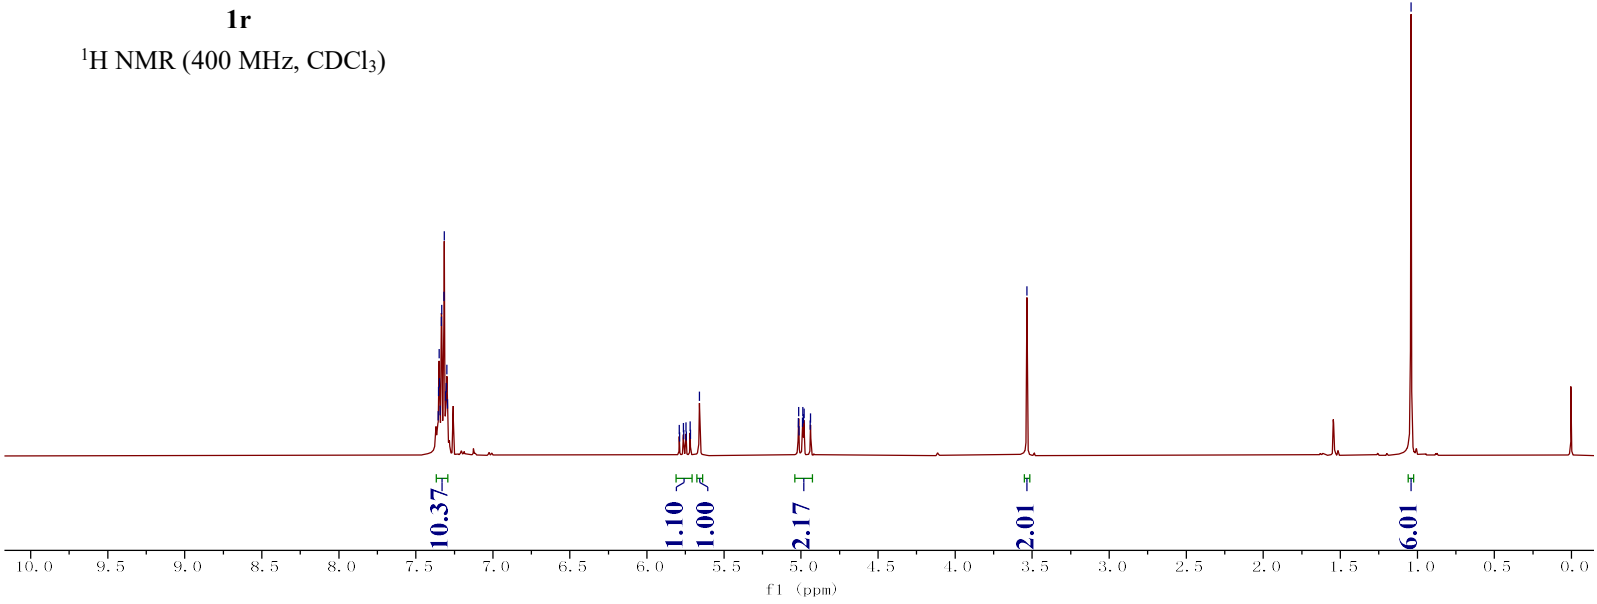

11xjm65ew-ch. 11. fid

— 171.90

— 143.79

— 137.02

— 129.04

— 128.95

— 128.02

— 114.08

— 111.76

— 56.17  
— 55.77

— 39.63

— 24.72

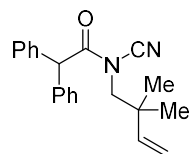

**1r**

<sup>13</sup>C NMR (100 MHz, CDCl<sub>3</sub>)

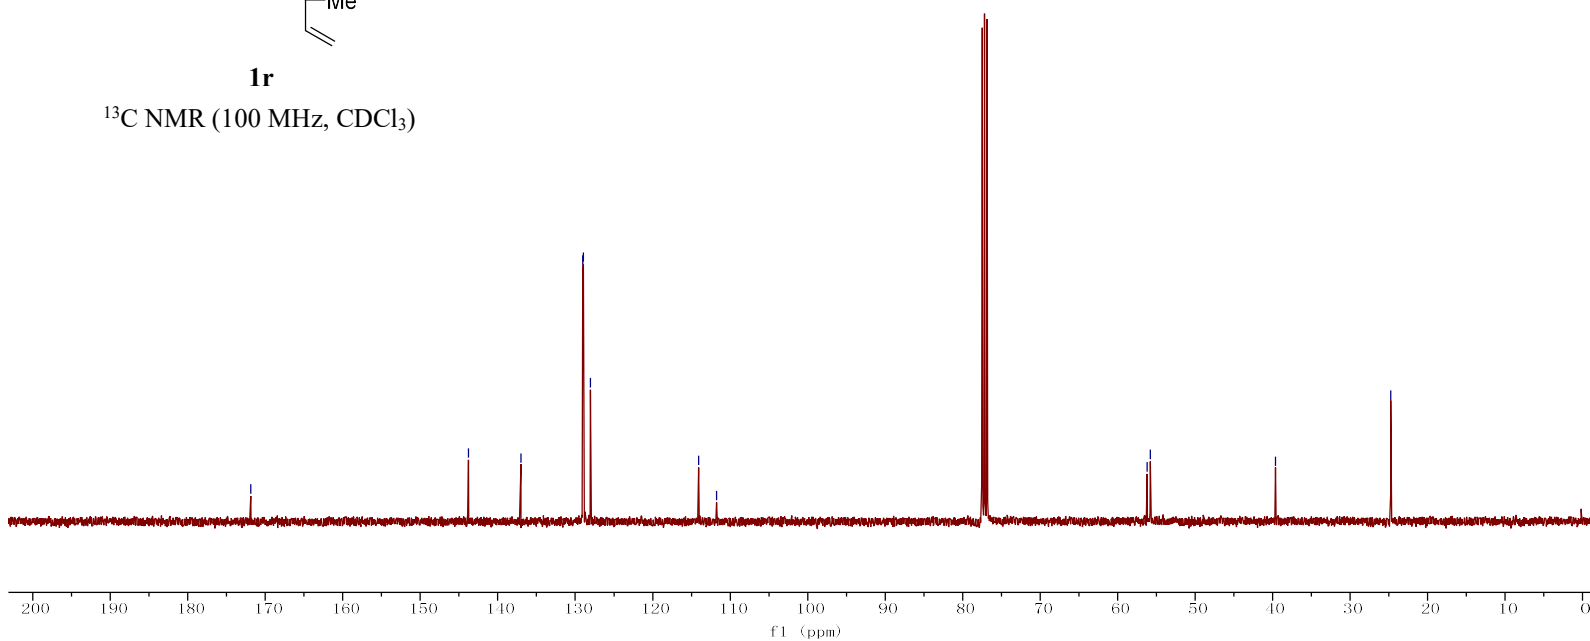

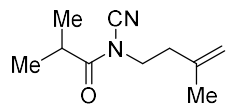

**1x**

<sup>1</sup>H NMR (400 MHz, CDCl<sub>3</sub>)

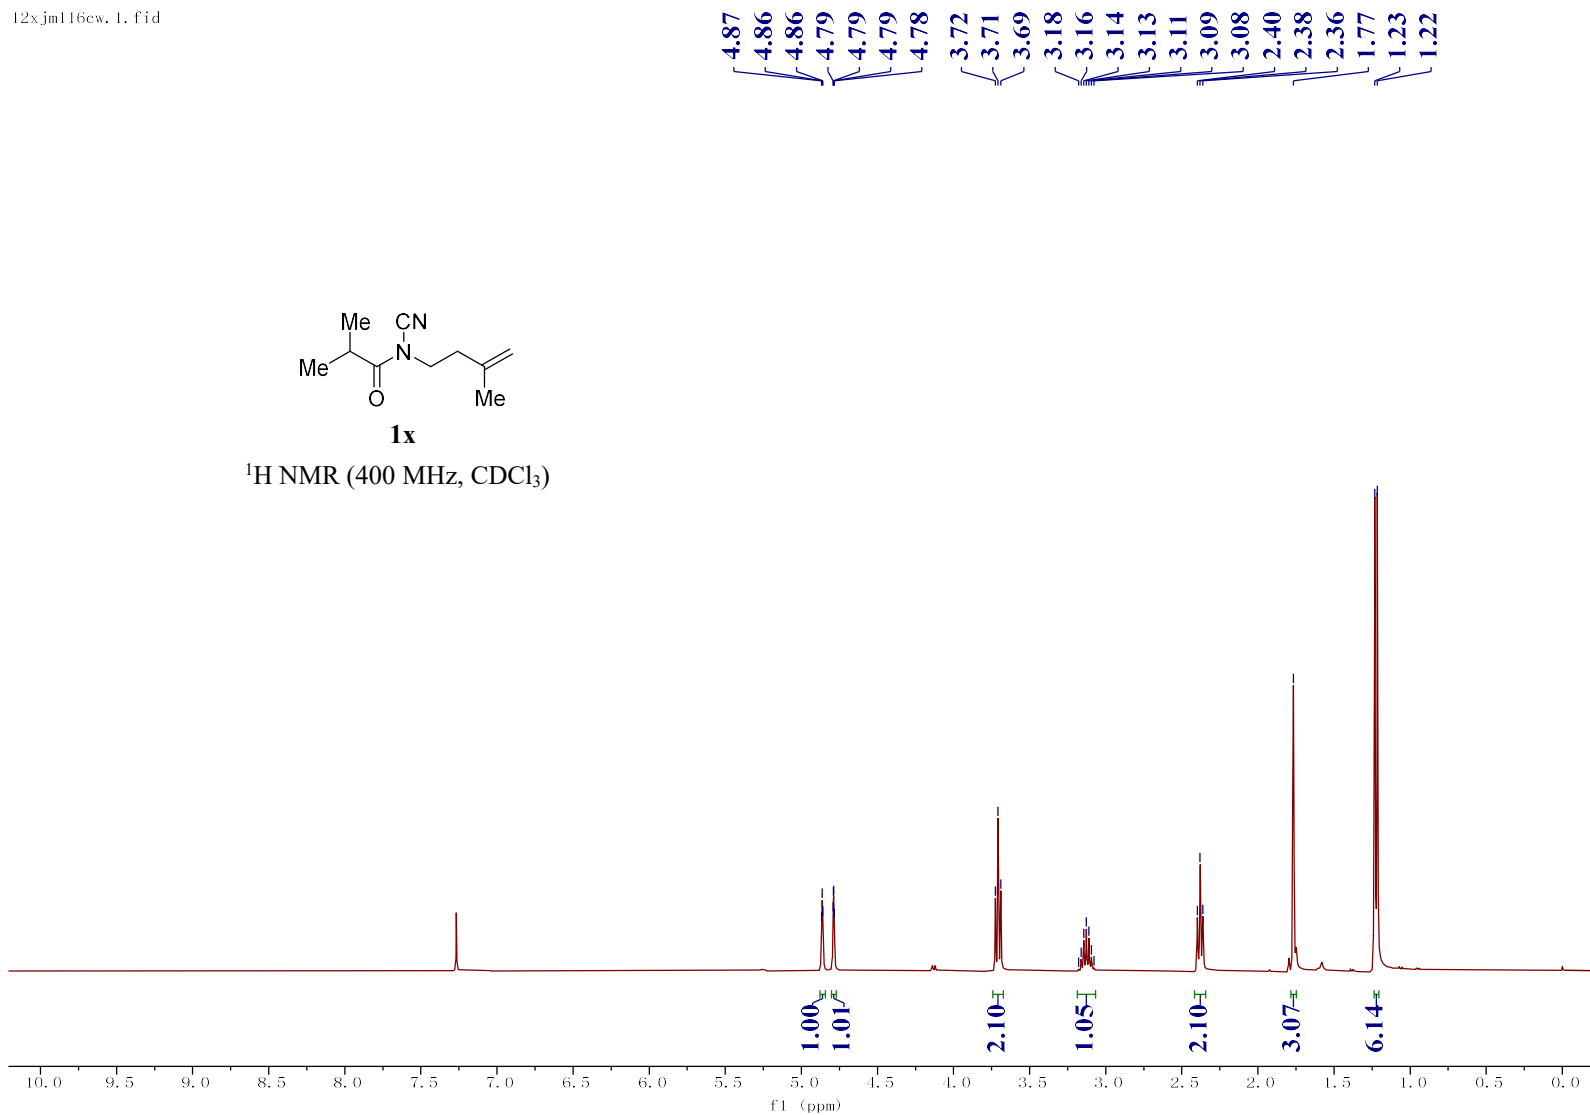



12xjml16ew-e. 21. fid

— 176.51

— 140.62

~ 113.95  
~ 110.72

— 44.17

~ 35.80  
~ 33.60

~ 22.03  
~ 19.09

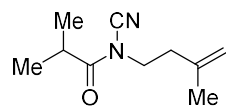

**1x**

<sup>13</sup>C NMR (125 MHz, CDCl<sub>3</sub>)

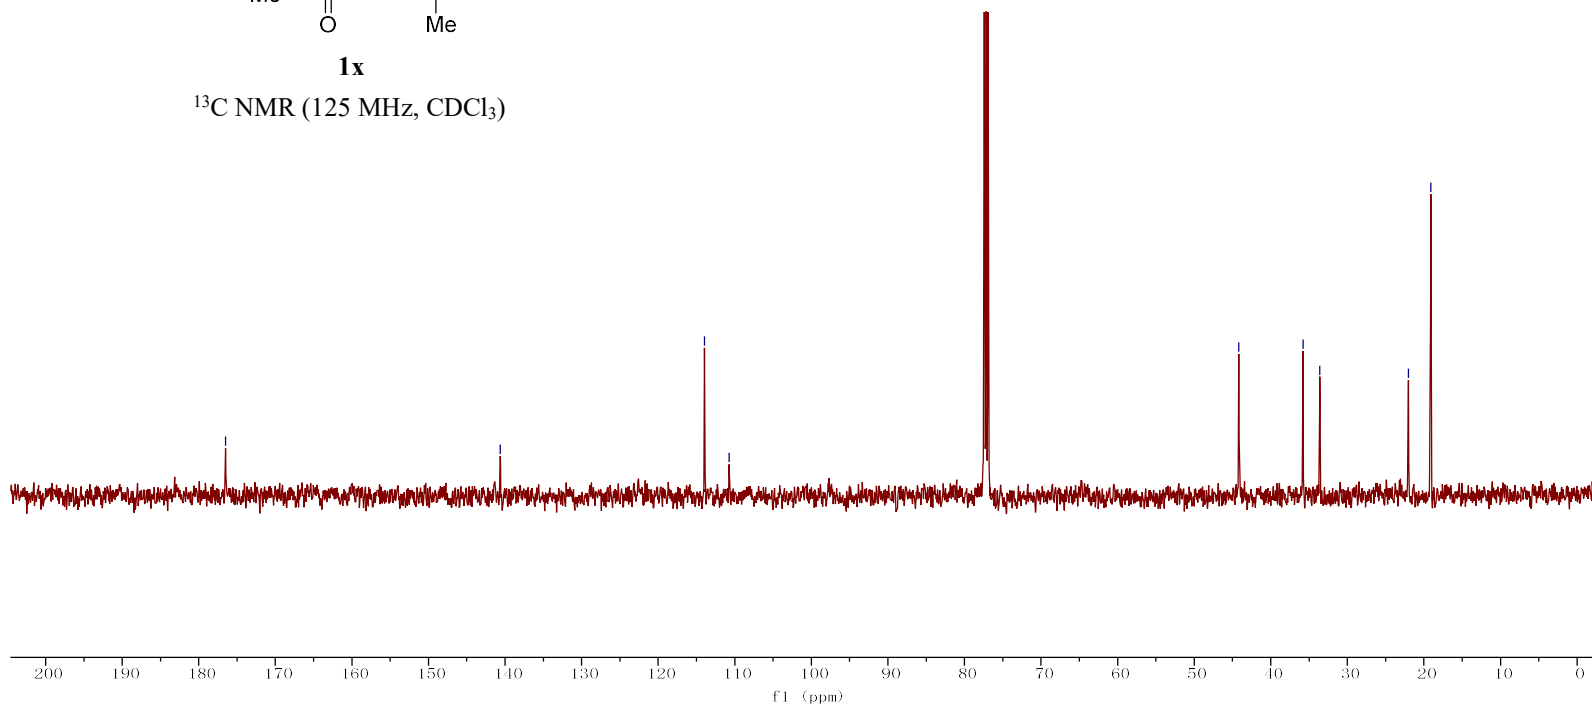

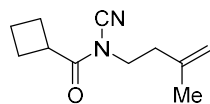

**1y**

<sup>1</sup>H NMR (500 MHz, CDCl<sub>3</sub>)

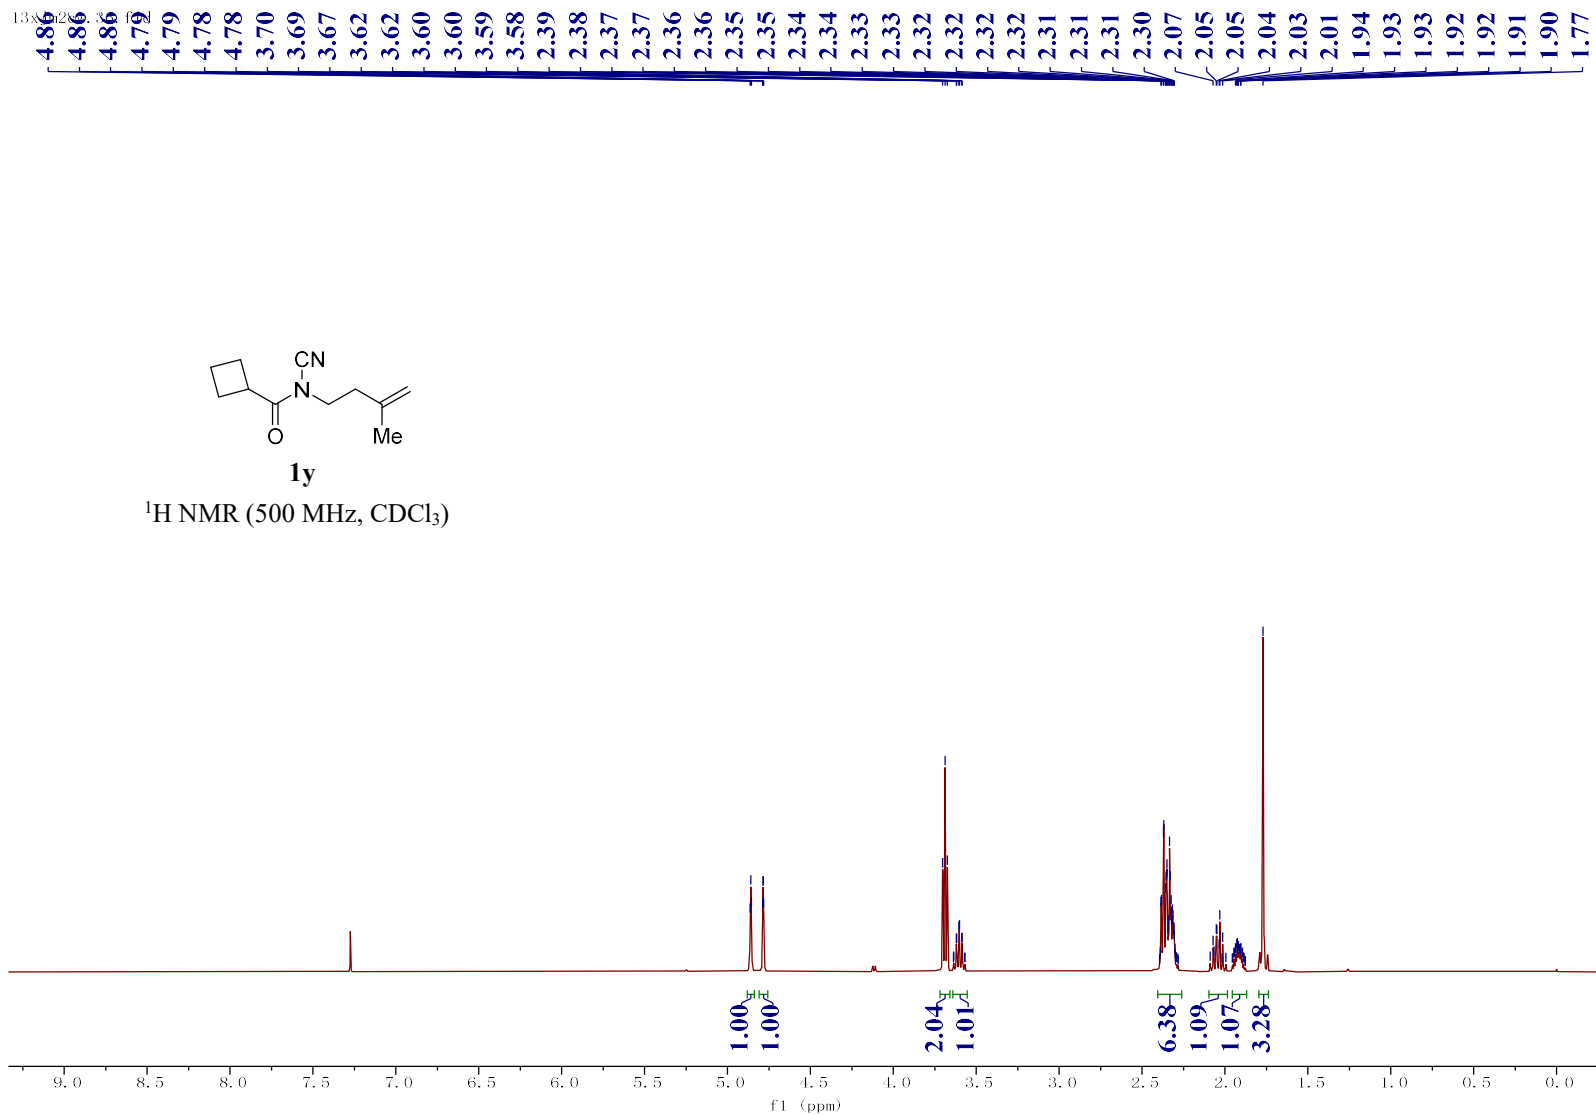

13xjm2cw.37.fid

— 174.23

— 140.62

— 113.84  
— 110.52

— 44.03  
— 38.44  
— 35.77

— 25.07  
— 22.06  
— 18.08

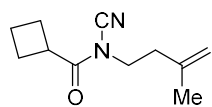

**1y**

<sup>13</sup>C NMR (125 MHz, CDCl<sub>3</sub>)

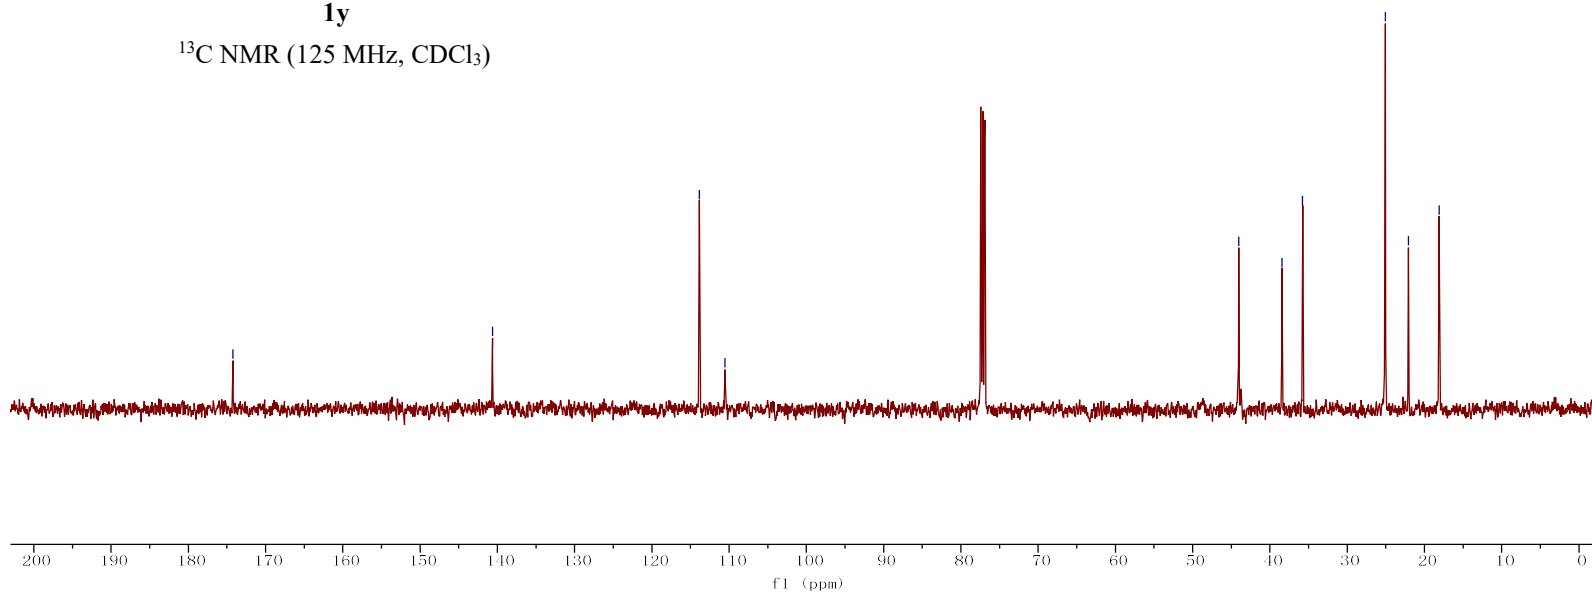

13.7  
 4.87  
 4.86  
 4.86  
 4.78  
 4.03  
 4.03  
 4.02  
 4.01  
 4.01  
 4.00  
 4.00  
 3.73  
 3.72  
 3.70  
 3.50  
 3.49  
 3.48  
 3.47  
 3.47  
 3.45  
 3.45  
 3.13  
 3.12  
 3.11  
 3.10  
 3.09  
 3.08  
 3.07  
 2.40  
 2.38  
 2.37  
 1.89  
 1.88  
 1.86  
 1.86  
 1.86  
 1.85  
 1.84  
 1.84  
 1.83  
 1.82  
 1.82  
 1.81  
 1.81  
 1.80  
 1.80  
 1.79  
 1.79  
 1.79  
 1.77

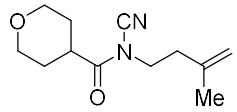

**1z**

<sup>1</sup>H NMR (500 MHz, CDCl<sub>3</sub>)

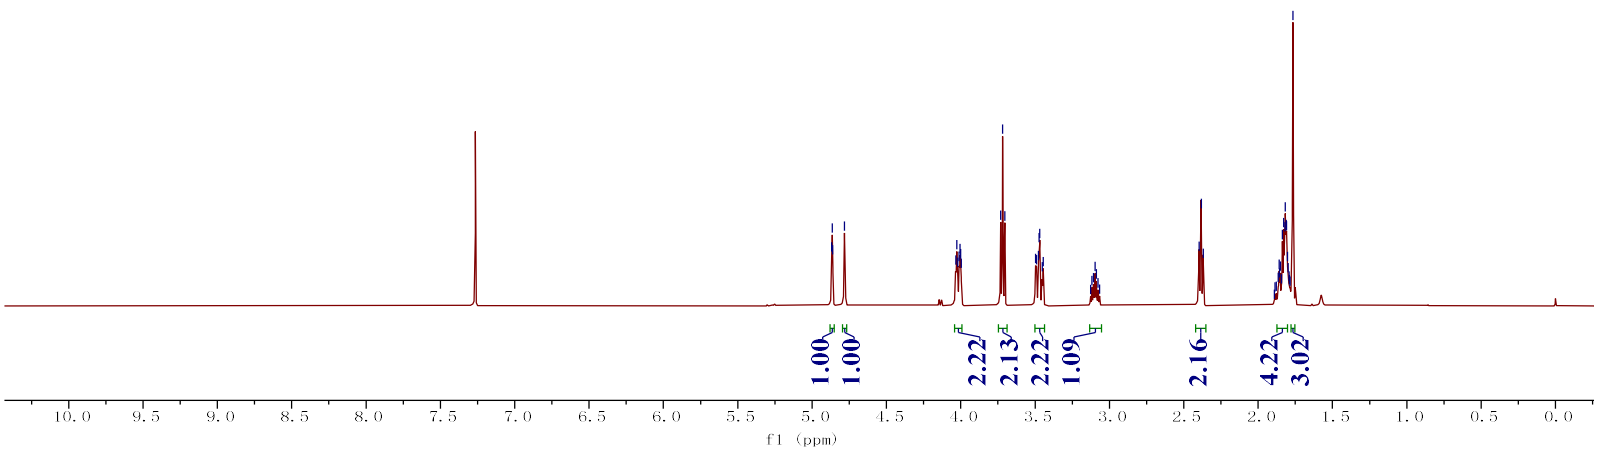

13xjm3cw-e, 2, fid

— 173.70

— 140.52

— 114.09  
— 110.54

— 66.75

— 44.15  
— 40.17  
— 35.78  
— 28.55  
— 22.00

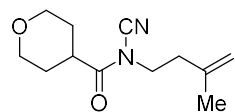

**1z**

<sup>13</sup>C NMR (100 MHz, CDCl<sub>3</sub>)

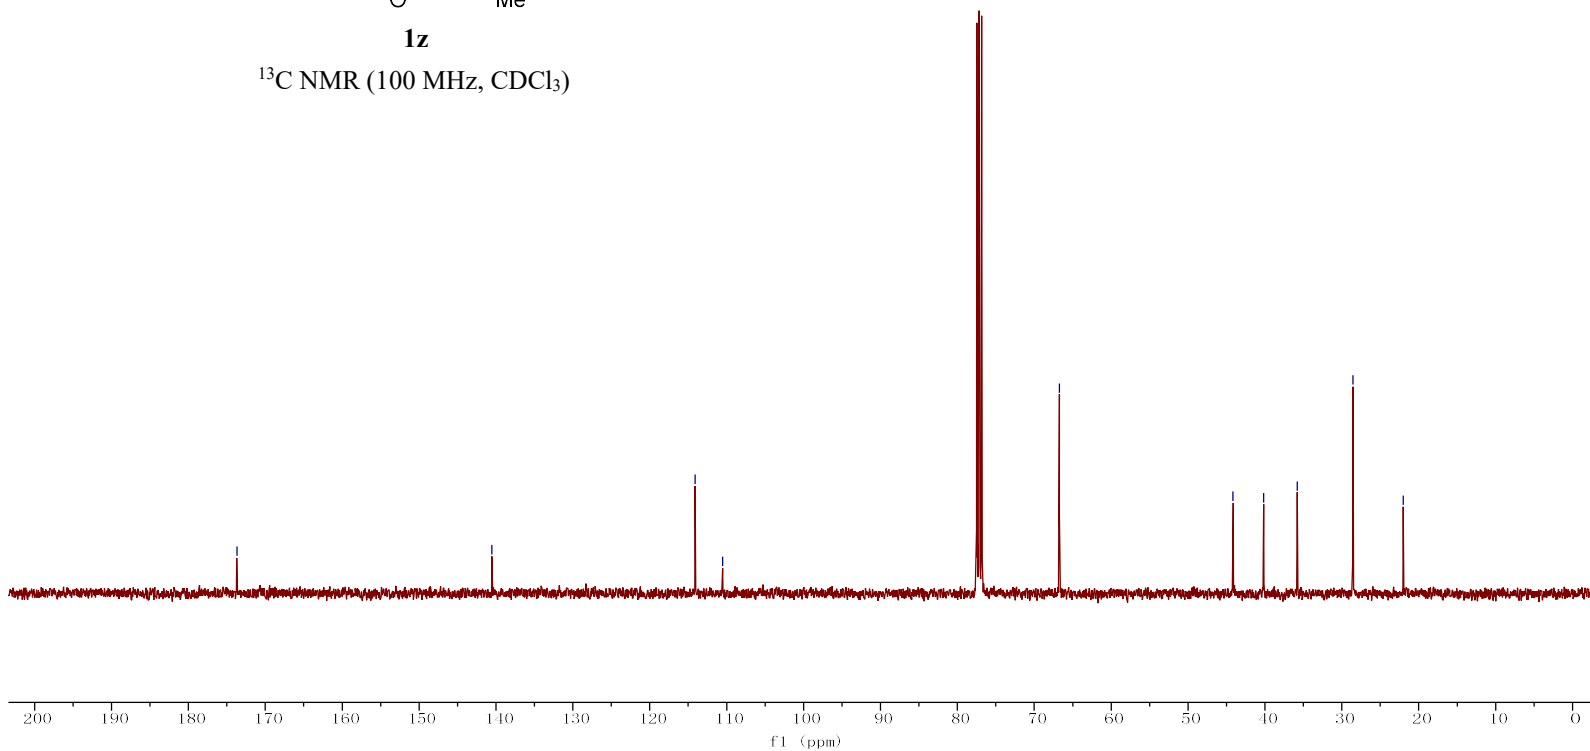

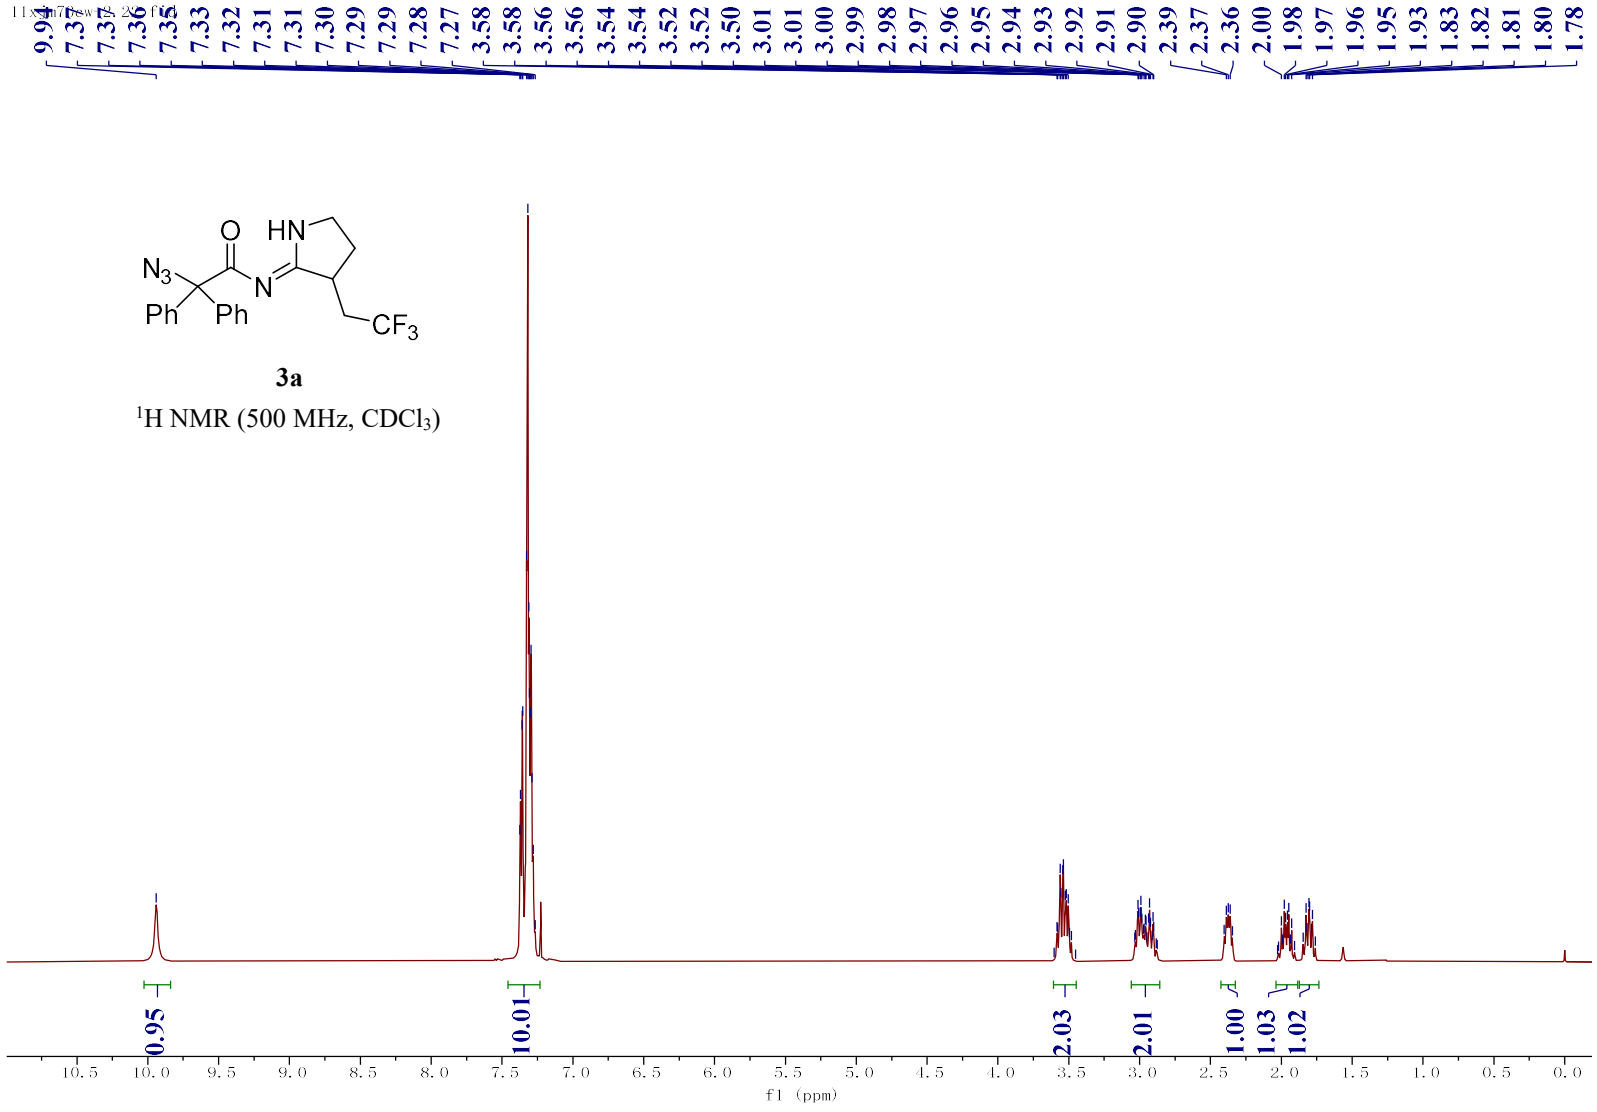

11xjm70ew.35.8d

— 184.78

— 174.86

140.79  
140.74  
130.11  
128.50  
128.11  
127.96  
127.89  
125.71  
123.52

— 78.85

45.57  
39.46  
35.83  
35.60  
35.37  
35.15  
— 27.09

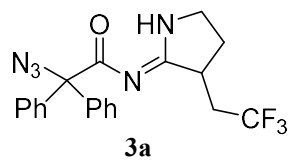

<sup>13</sup>C NMR (125 MHz, CDCl<sub>3</sub>)

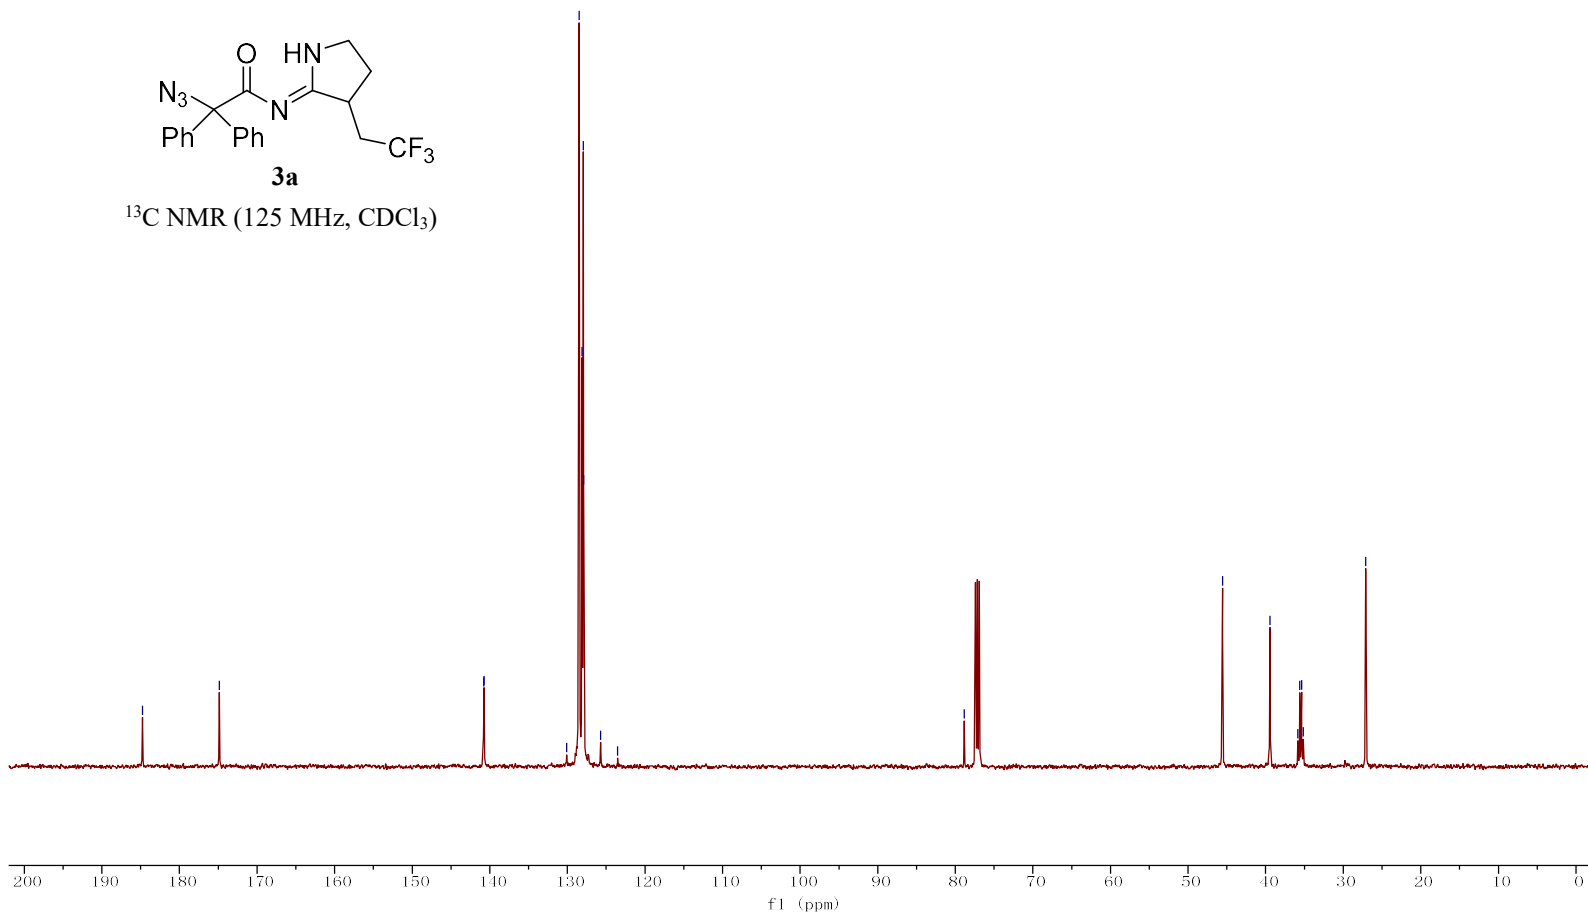

11xjm70ew-2-f, 23. fid

-64.57  
-64.60  
-64.62

-64.57  
-64.60  
-64.62

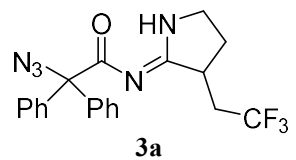

<sup>19</sup>F NMR (470 MHz, CDCl<sub>3</sub>)

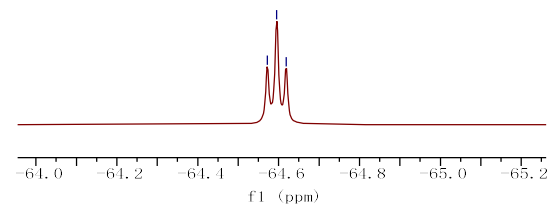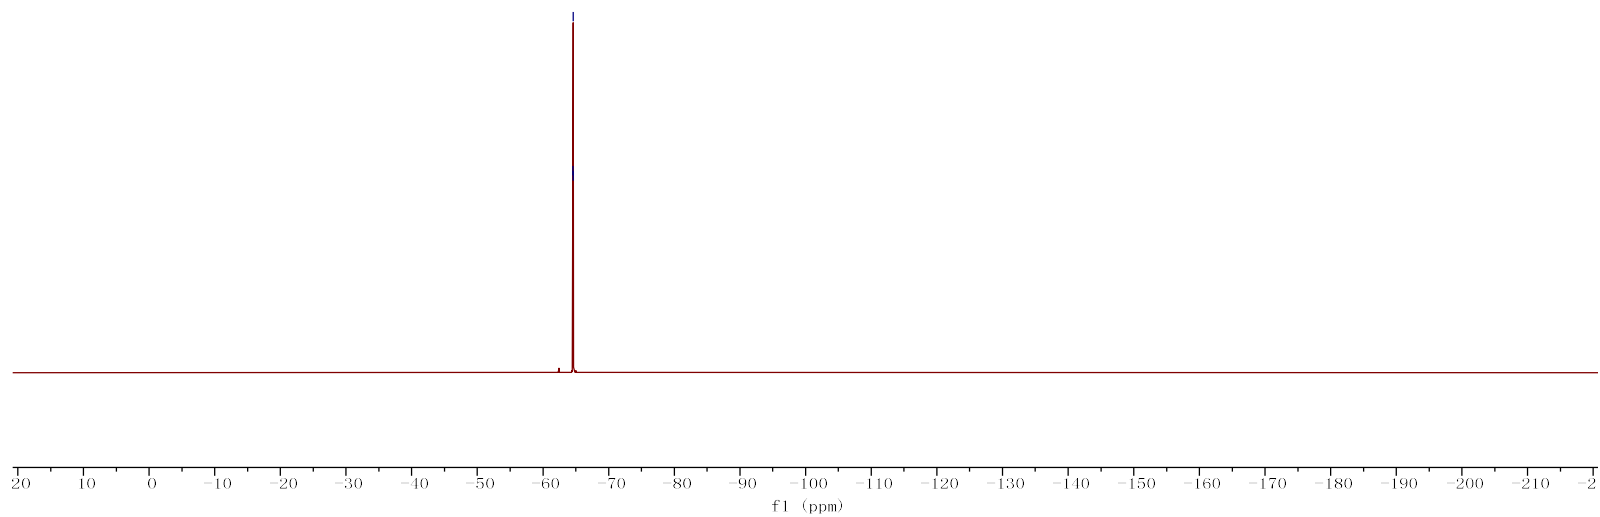



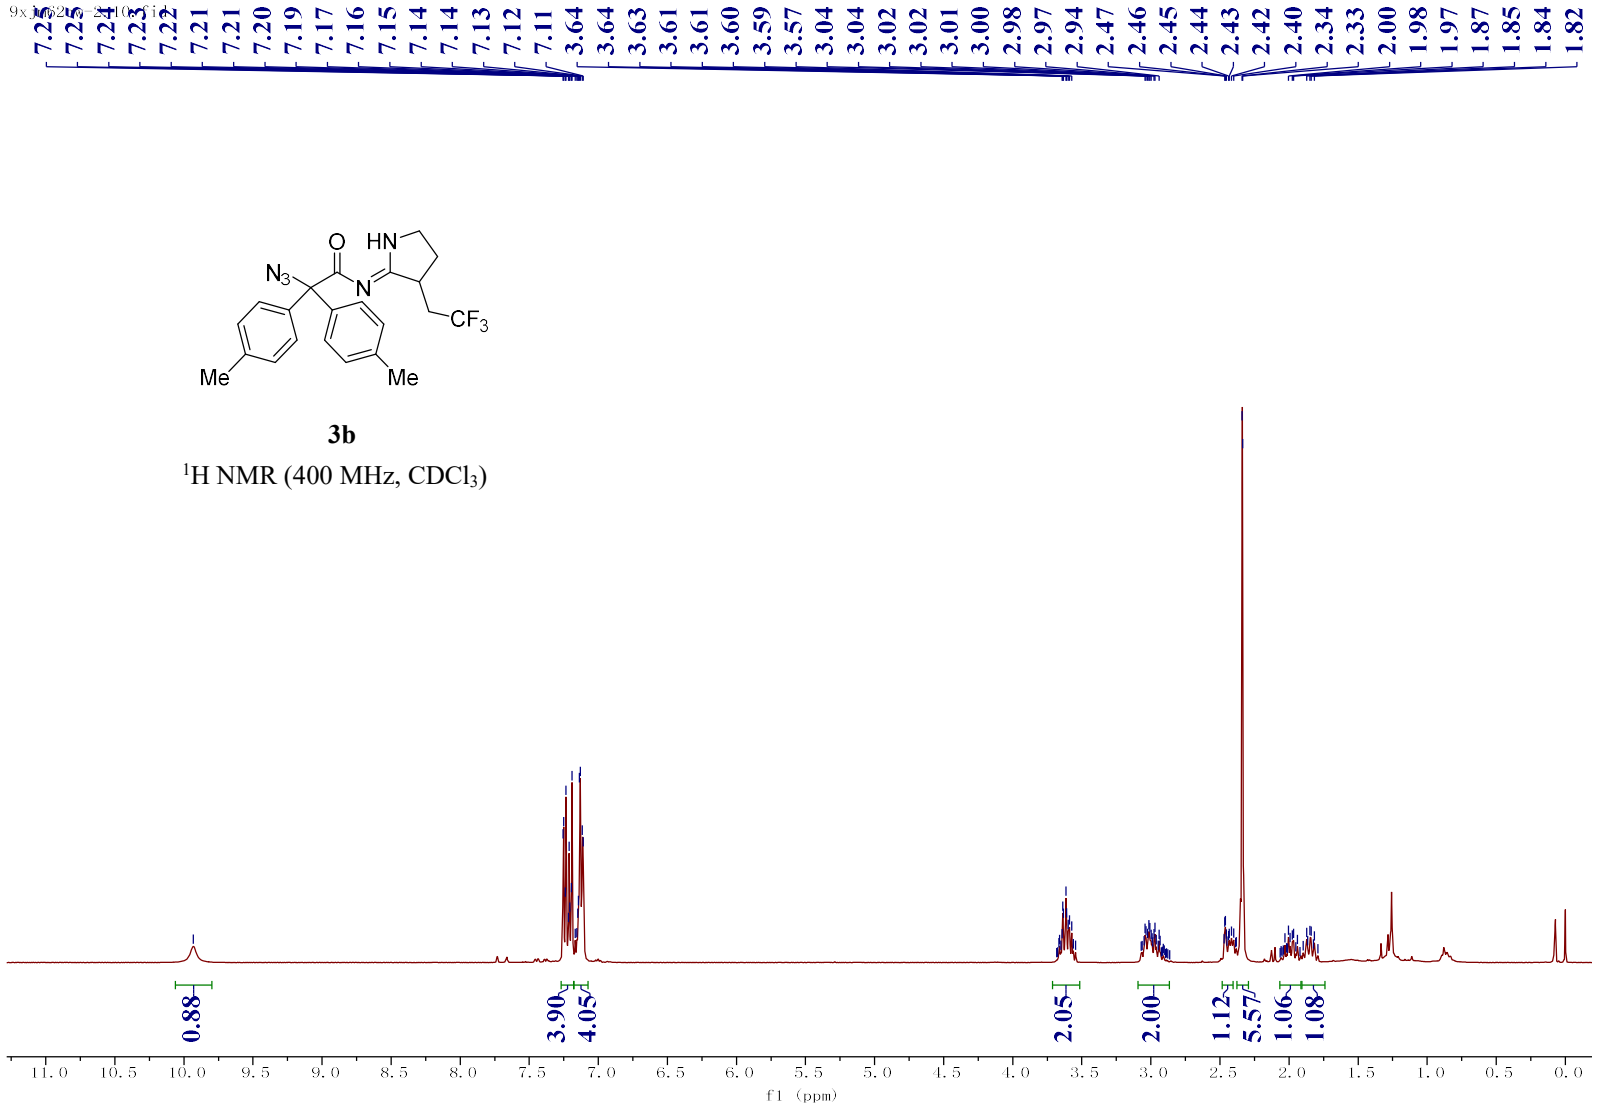

9xjm62cw-2\_13.fid

— 185.27

— 174.90

137.99  
137.89  
137.68  
137.62  
131.00  
128.83  
128.71  
128.40  
128.40  
128.25  
128.21  
125.50  
122.75

— 78.65

45.62  
39.49  
39.47  
39.44  
39.41  
36.00  
35.71  
35.42  
35.13  
27.20  
21.23  
21.21

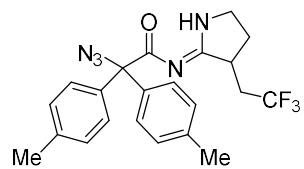

**3b**

$^{13}\text{C}$  NMR (100 MHz,  $\text{CDCl}_3$ )

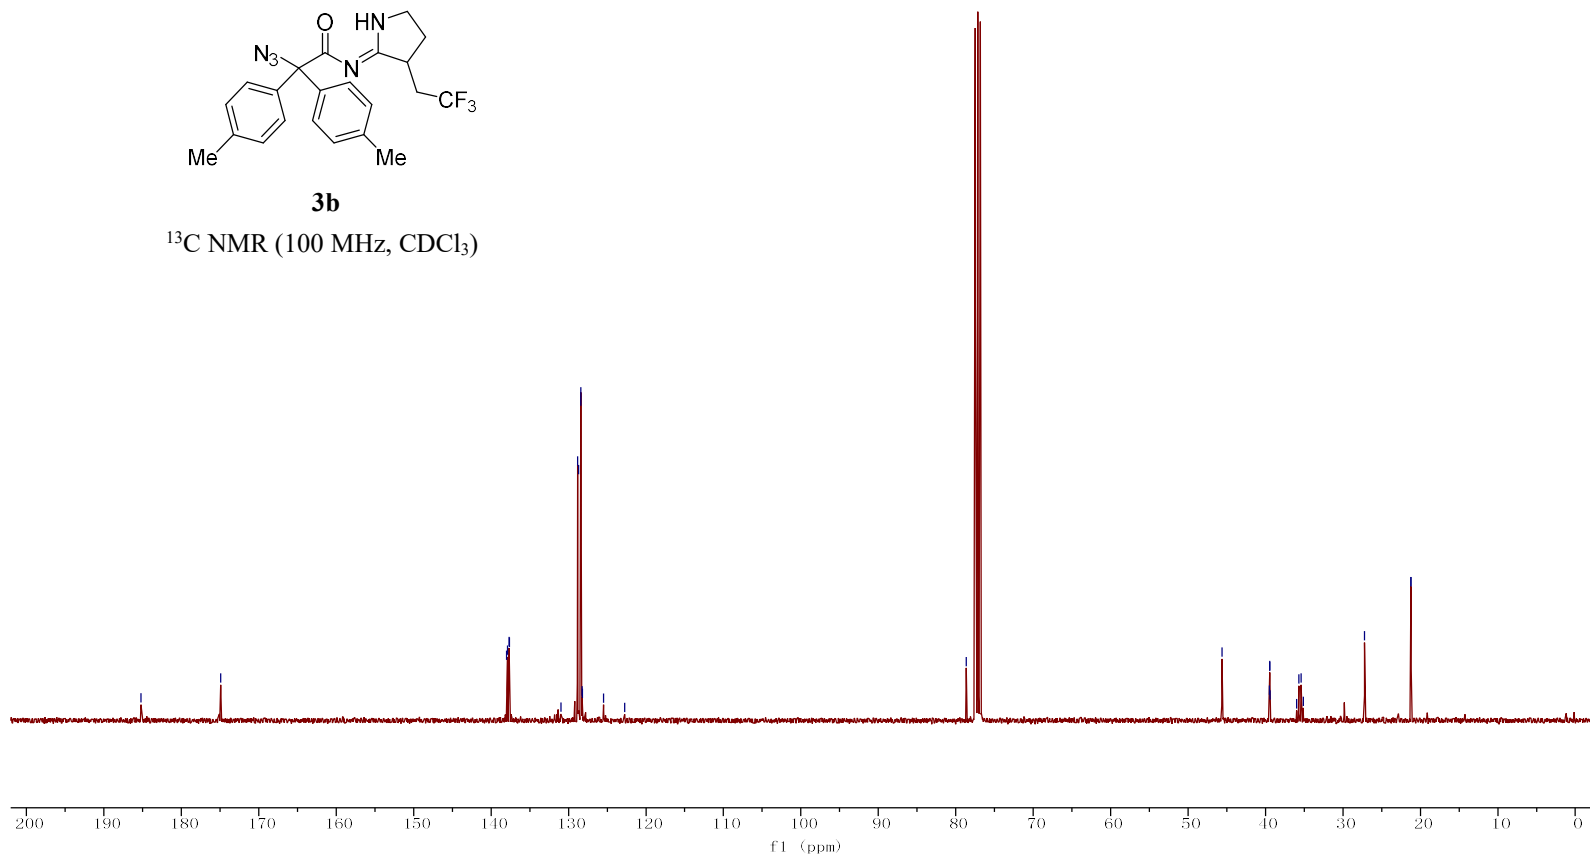

9xjm62cw-2.11.fid

-64.59  
-64.62  
-64.65

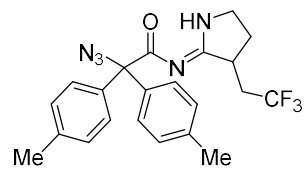

**3b**

<sup>19</sup>F NMR (376 MHz, CDCl<sub>3</sub>)

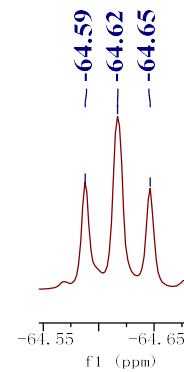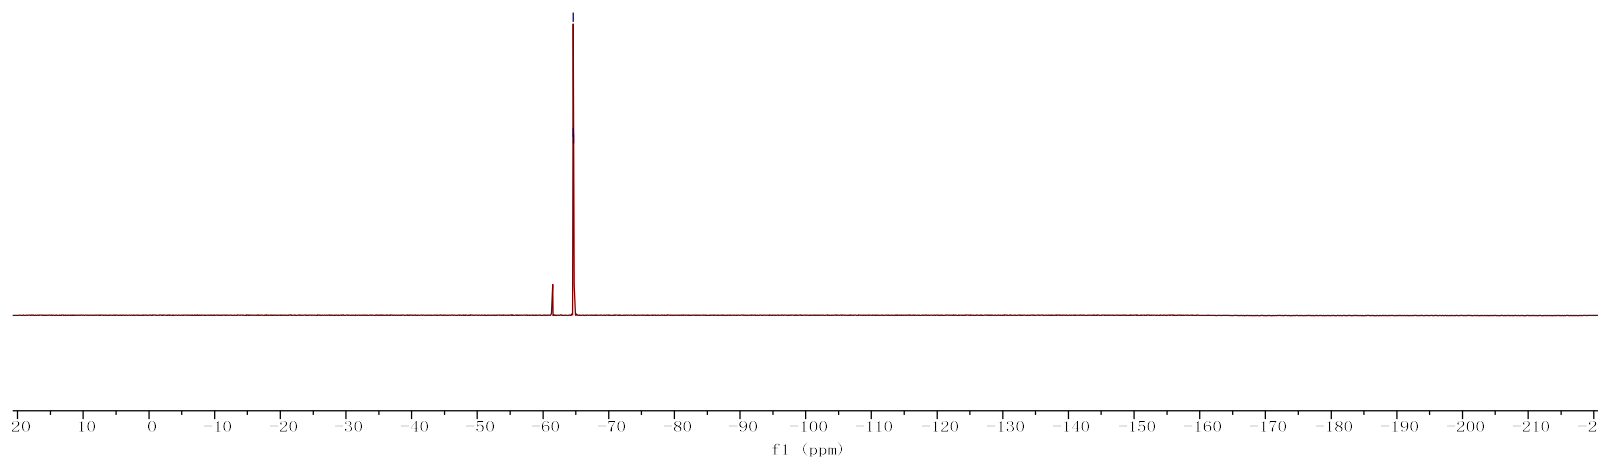

7.31  
7.30  
7.29  
7.28  
7.26  
7.19  
7.18  
7.18  
7.17  
7.16  
7.15  
7.13  
7.13  
7.11  
7.10  
7.09  
7.09  
3.64  
3.64  
3.62  
3.62  
3.61  
3.61  
3.60  
3.59  
3.58  
3.57  
3.57  
3.31  
3.30  
3.27  
3.26  
3.03  
3.03  
3.02  
3.01  
3.00  
3.00  
2.99  
2.98  
2.42  
2.41  
2.39  
2.37  
2.33  
2.33  
1.86  
1.83  
1.82  
1.80

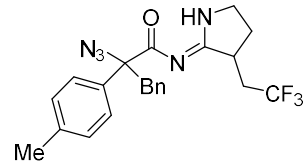

**3d**

<sup>1</sup>H NMR (400 MHz, CDCl<sub>3</sub>)

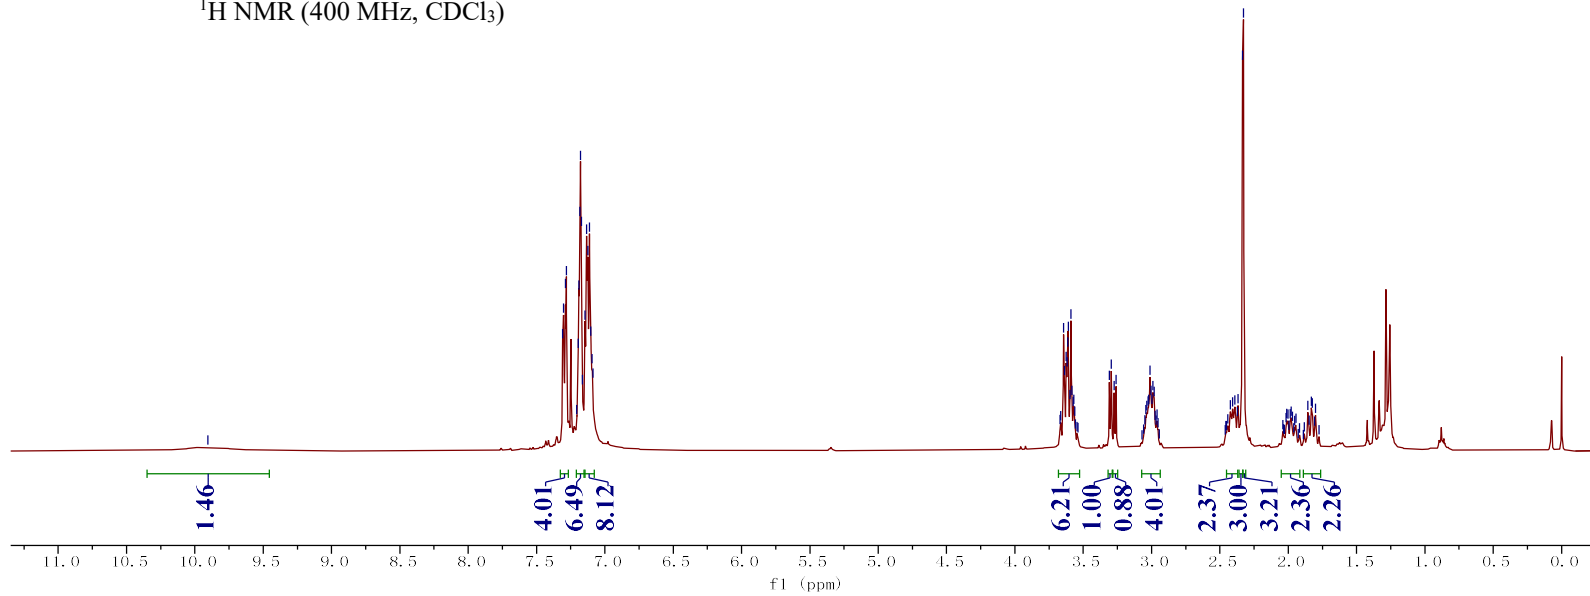

11xjm55ew-1.12.tif

185.10  
185.02  
174.87  
174.65

137.66  
137.58  
136.89  
136.69  
136.62  
130.94  
130.81  
129.19  
129.13  
128.23  
127.91  
127.85  
126.71  
126.69  
126.44  
126.36  
125.51

75.82  
75.78

45.64  
45.58  
44.73  
44.53  
39.47  
39.44  
39.40  
39.37  
35.89  
35.71  
35.60  
35.42  
27.24  
27.17  
21.18

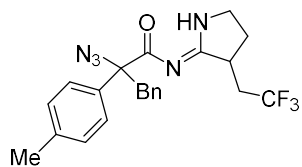

**3d**

<sup>13</sup>C NMR (100 MHz, CDCl<sub>3</sub>)

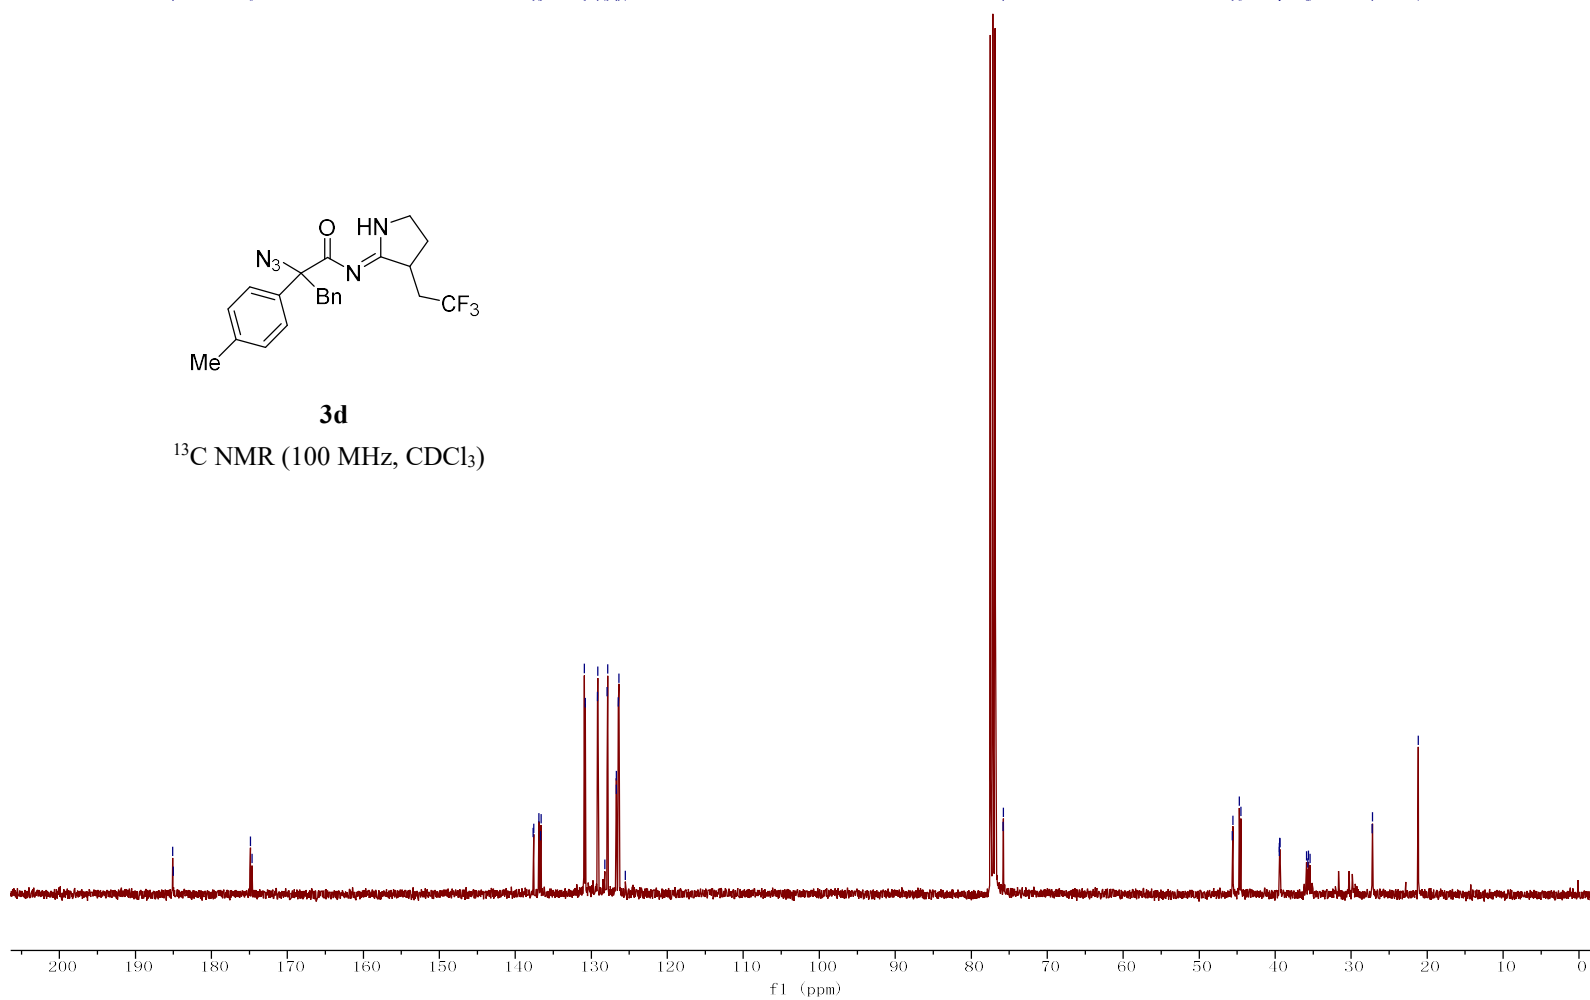

11xjm55ew-1.11.fid

-64.61  
-64.64  
-64.67

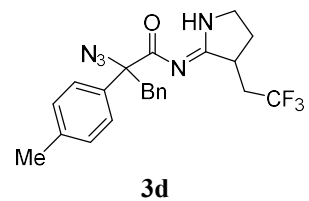

<sup>19</sup>F NMR (376 MHz, CDCl<sub>3</sub>)

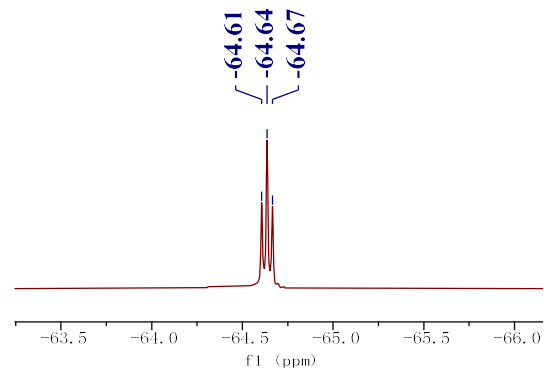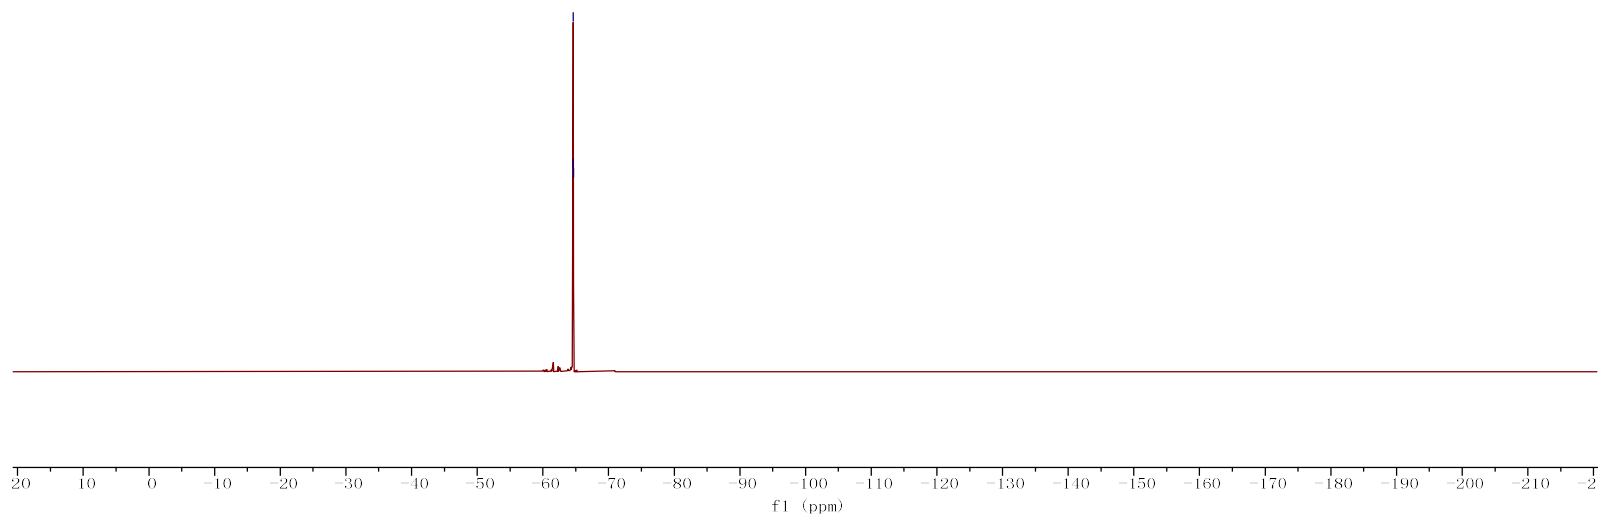

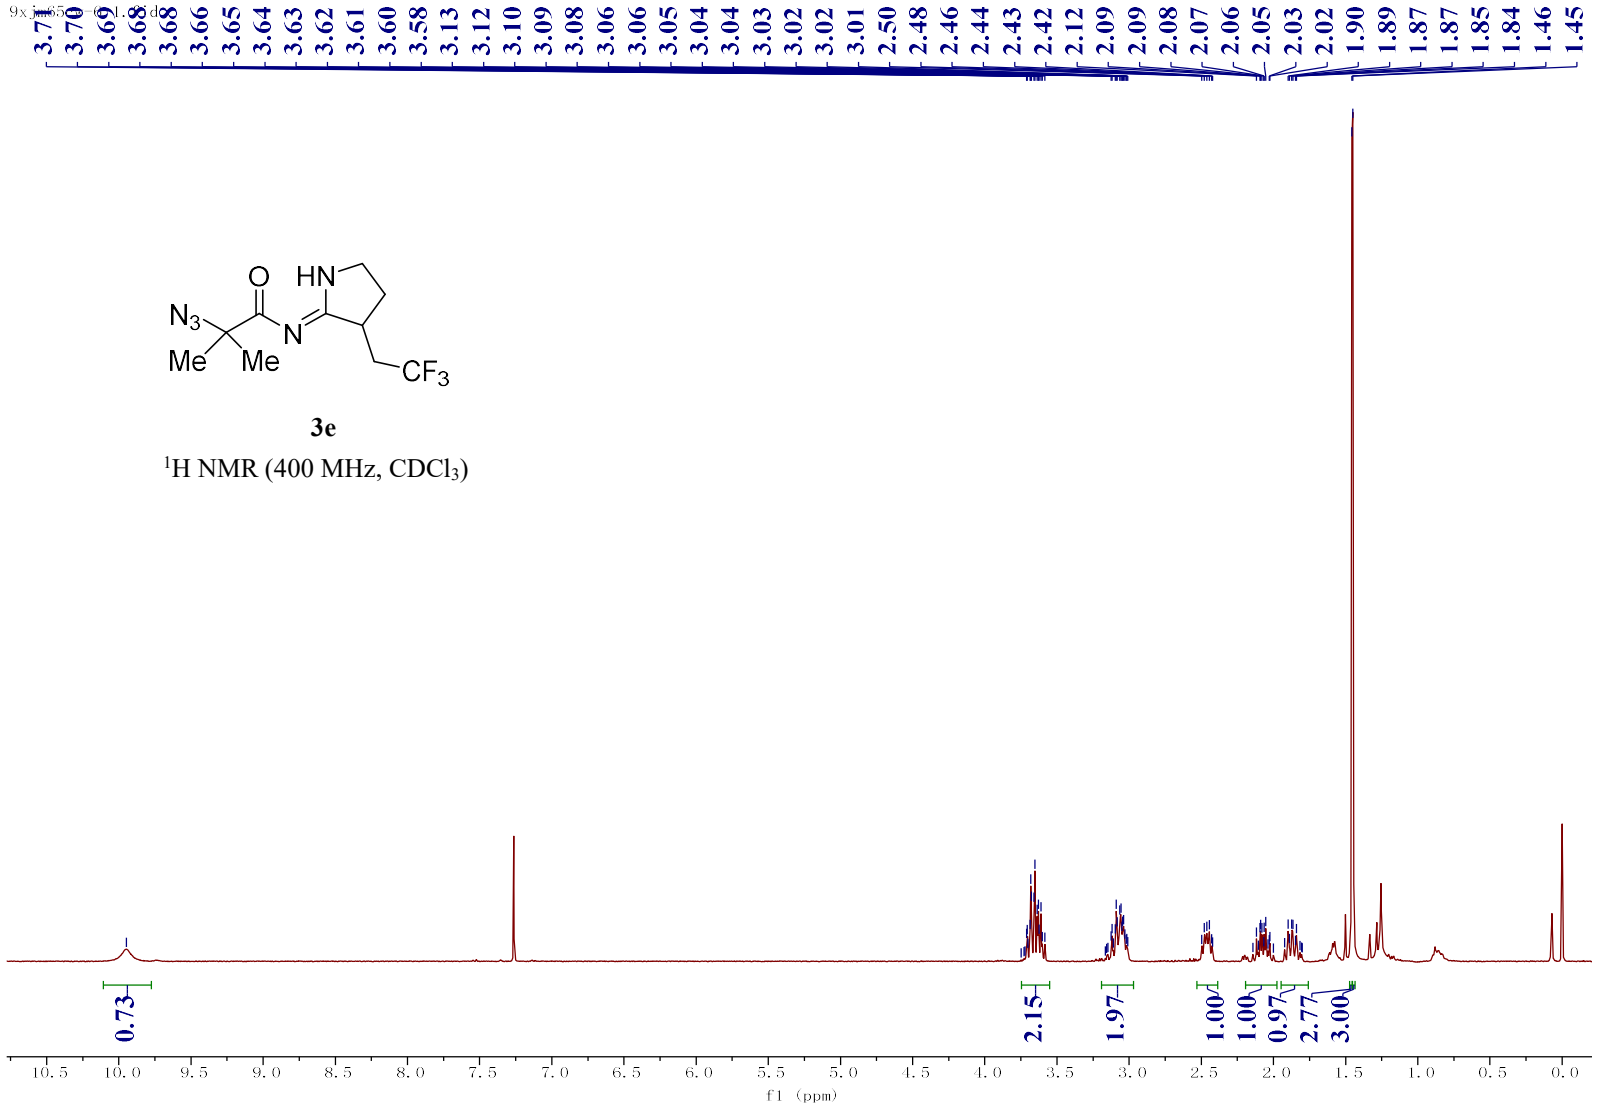

9xjm65cw-6, 14.1.1r

— 187.90  
— 174.98

✓ 131.05  
✓ 128.30  
✓ 125.56  
✓ 122.81

✓ 65.94  
✓ 45.53  
✓ 39.46  
✓ 39.44  
✓ 39.41  
✓ 39.38  
✓ 36.25  
✓ 35.96  
✓ 35.68  
✓ 35.39  
✓ 27.33  
✓ 24.95  
✓ 24.88

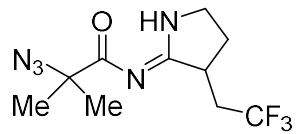

**3e**

<sup>13</sup>C NMR (100 MHz, CDCl<sub>3</sub>)

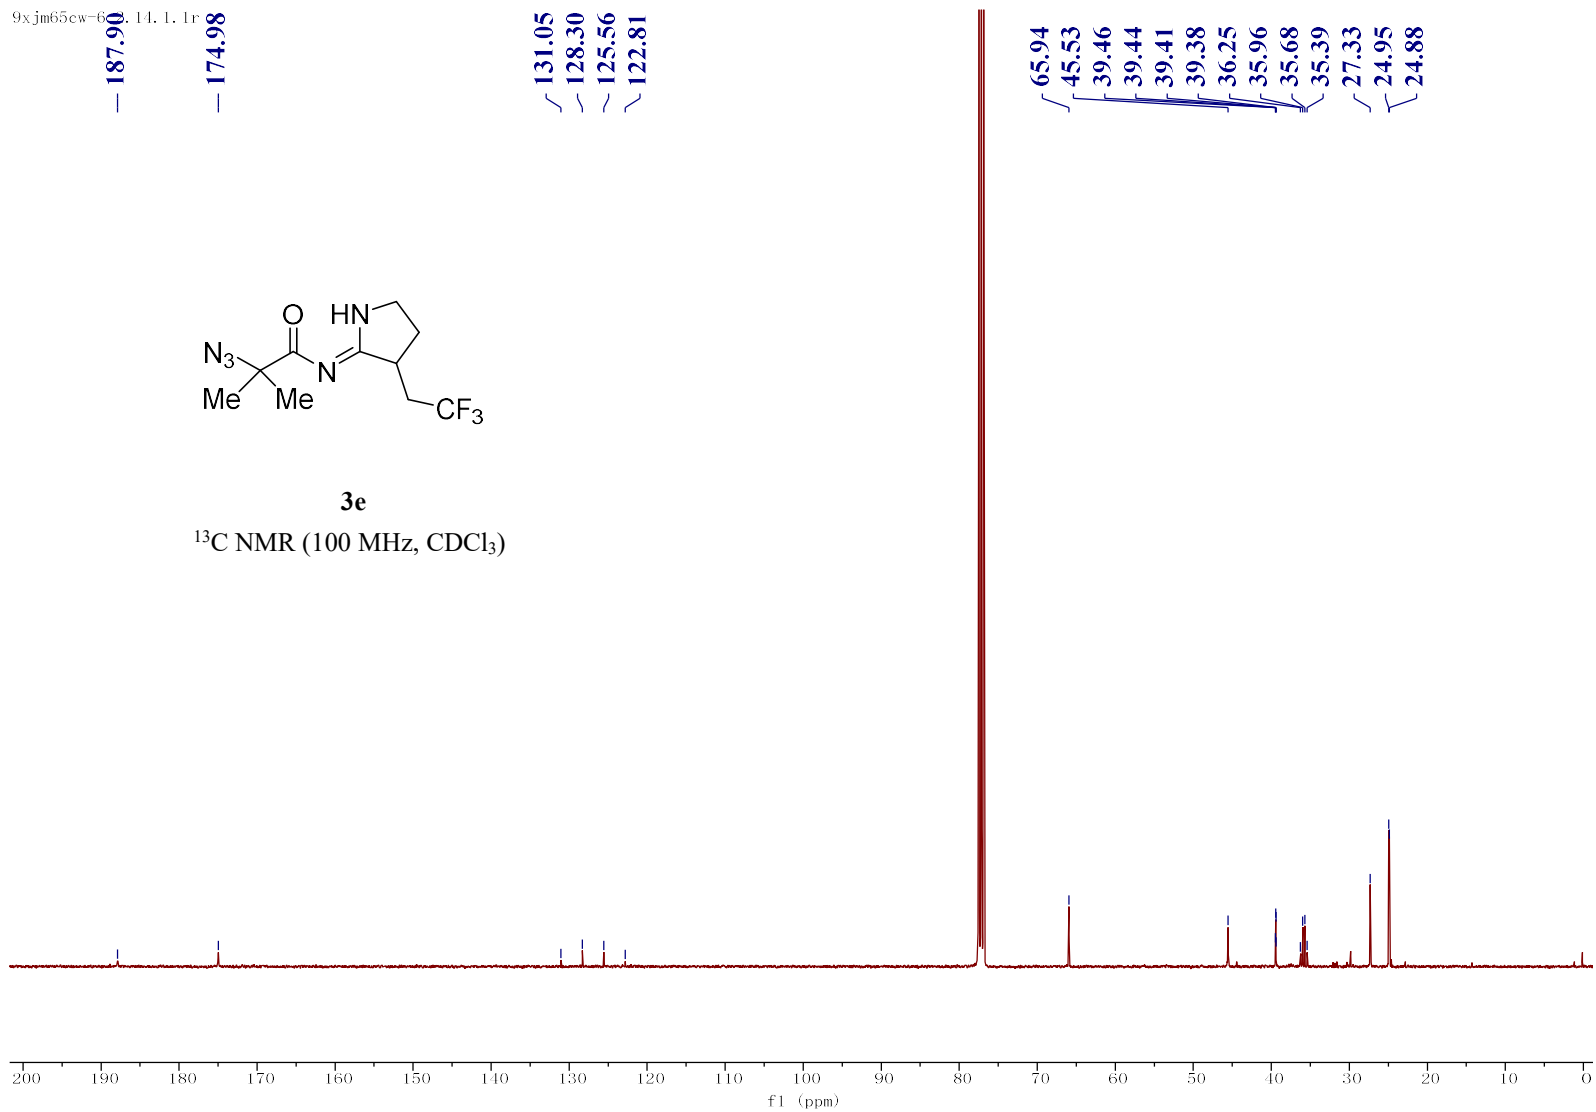



9xjm65cw-6.12.fid

-64.69  
-64.72  
-64.75

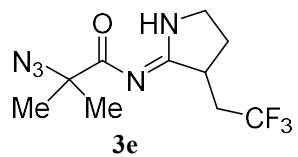

<sup>19</sup>F NMR (376 MHz, CDCl<sub>3</sub>)

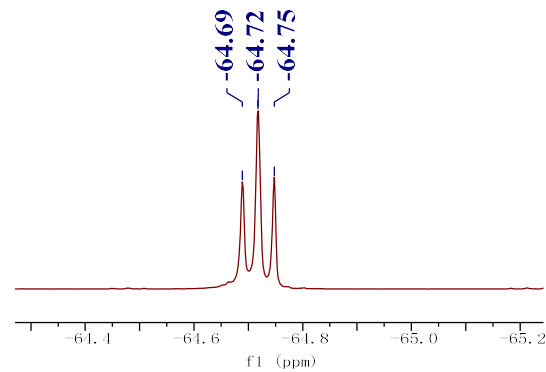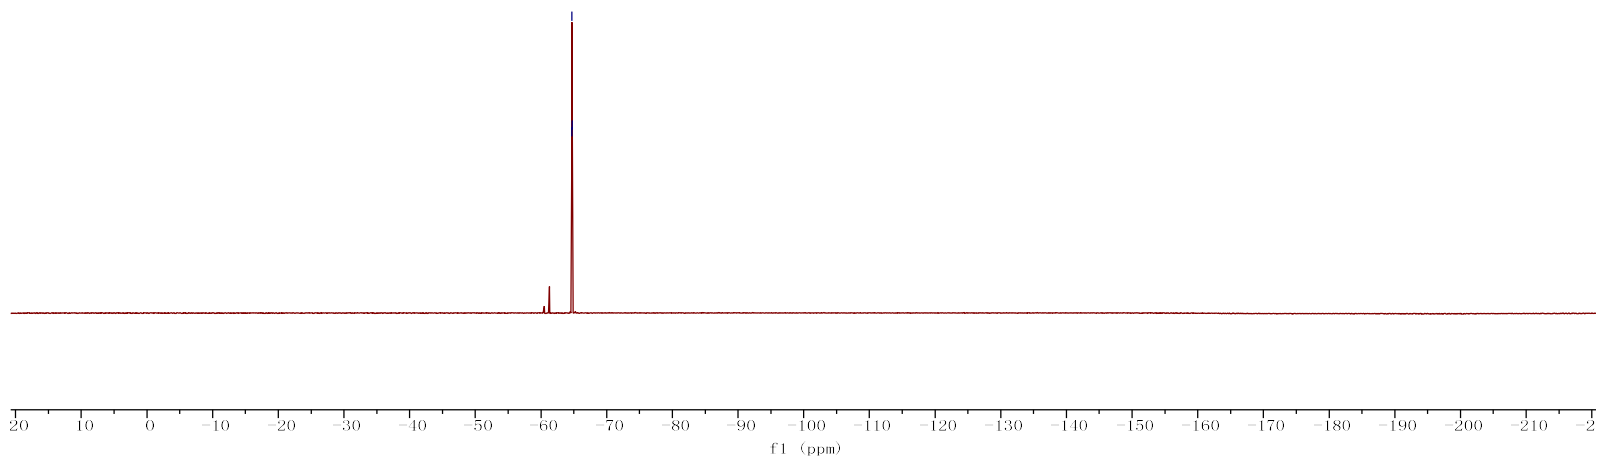

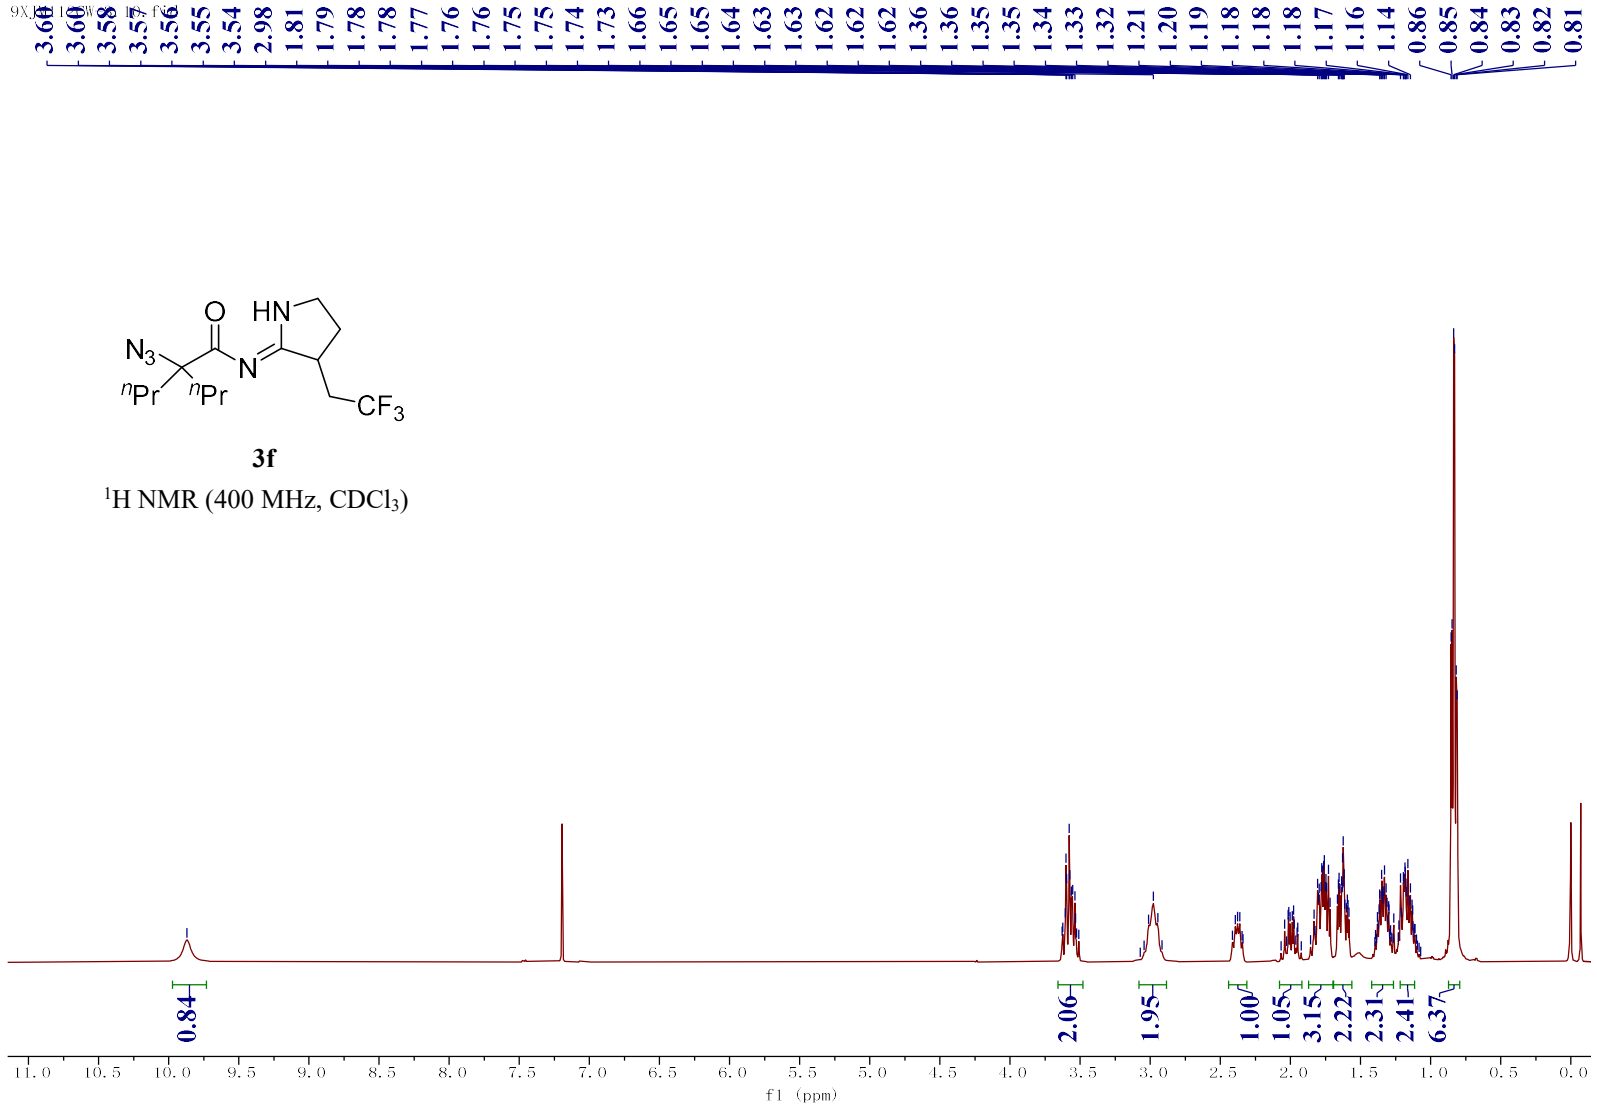

9xjml12ew. 11. fid

— 174.45

✓ 131.05  
✓ 128.30  
✓ 125.55  
✓ 122.80

— 72.90

45.54  
39.39  
39.36  
39.30  
39.24  
36.19  
35.90  
35.62  
35.33  
— 27.23  
17.69  
17.62  
14.48  
14.48

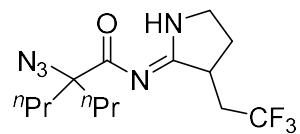

**3f**

$^{13}\text{C}$  NMR (100 MHz,  $\text{CDCl}_3$ )

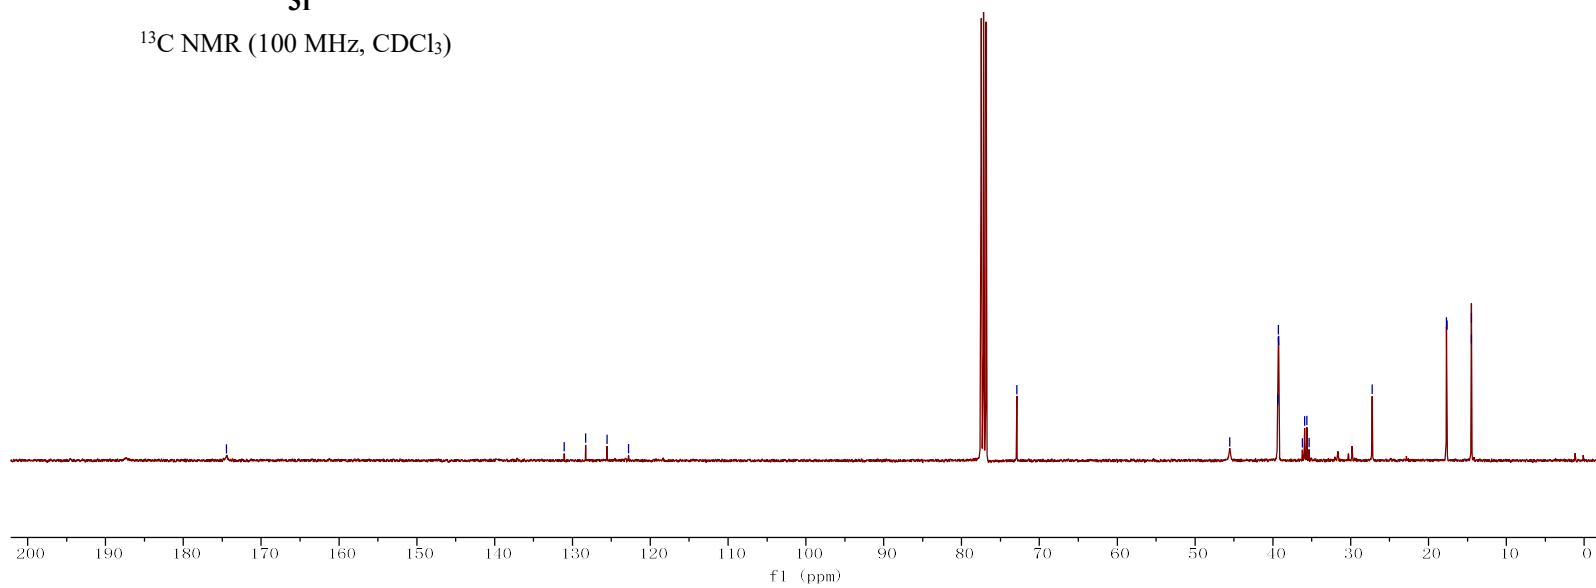

9XJM112CW-3, 12, fid

-64.58  
-64.61  
-64.64

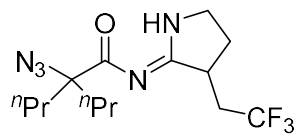

**3f**

<sup>19</sup>F NMR (376 MHz, CDCl<sub>3</sub>)

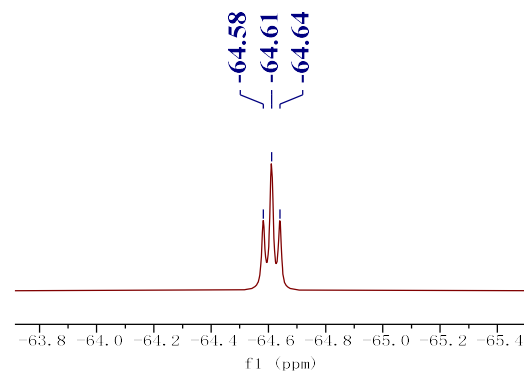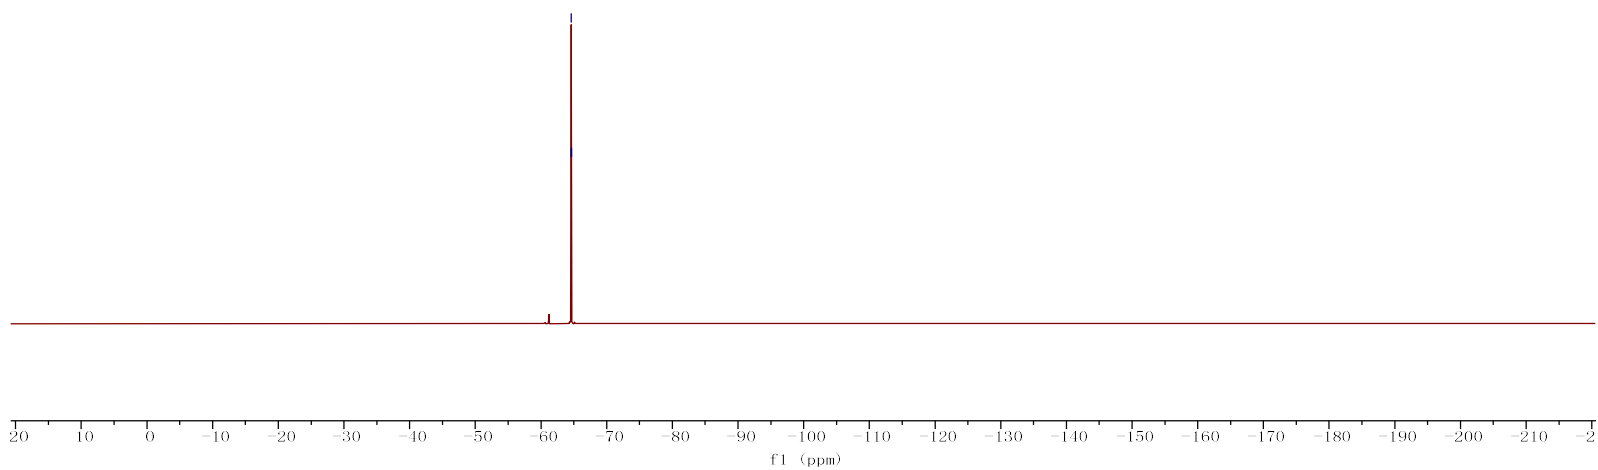

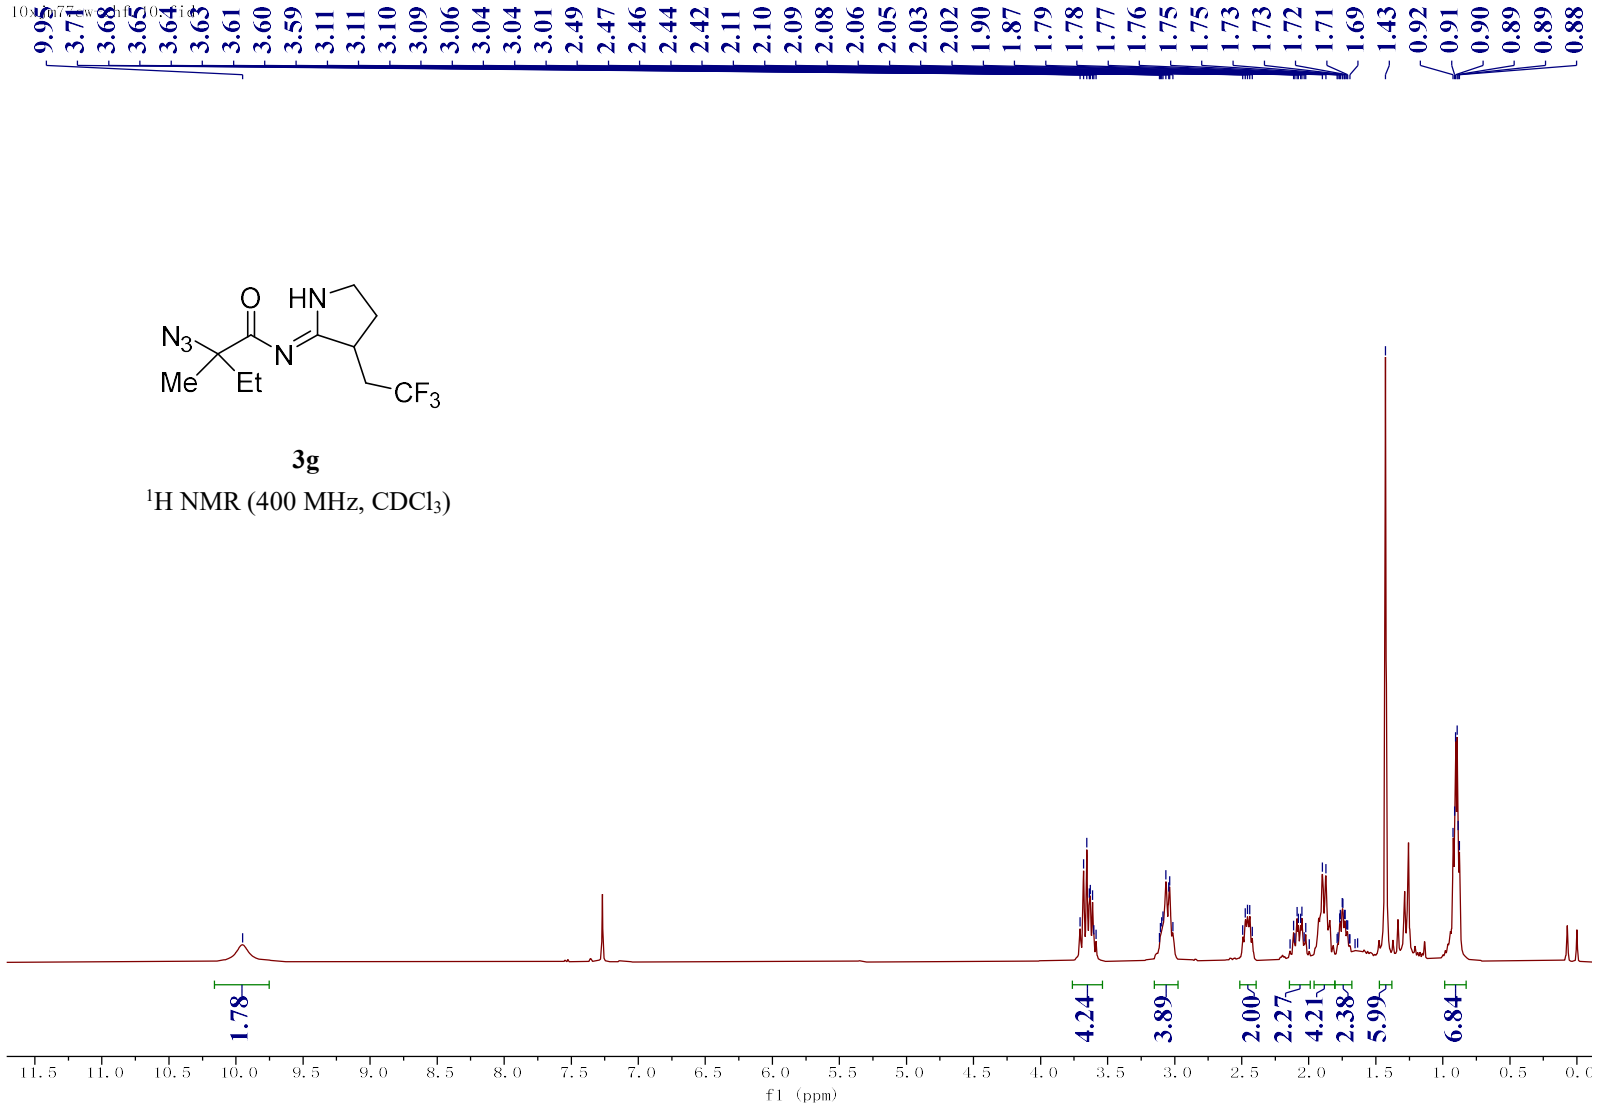

10xjm77ew-CHF, 12.6

— 187.60

— 174.74

— 131.05

— 128.30

— 125.55

— 122.80

69.73

69.72

45.54

39.46

39.43

39.40

39.37

36.23

35.95

35.66

35.37

31.30

31.22

27.28

22.43

22.41

— 8.73

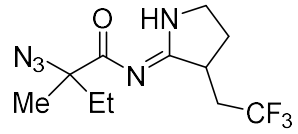

**3g**

<sup>13</sup>C NMR (100 MHz, CDCl<sub>3</sub>)

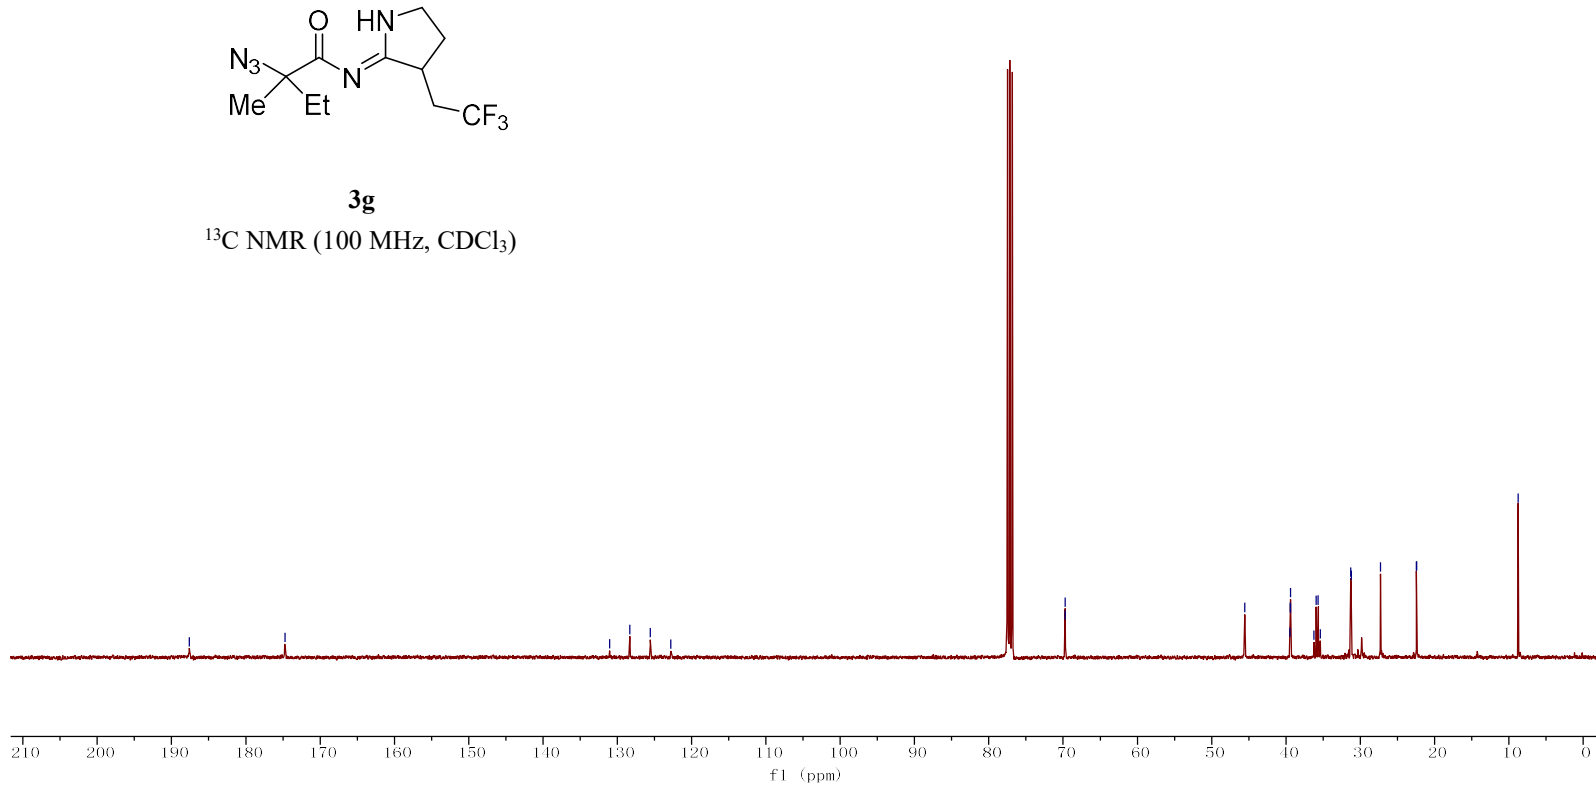

10xjm77ew-CHF, 11. fid

-64.65  
-64.67  
-64.68  
-64.70  
-64.71  
-64.73

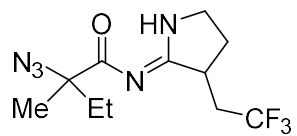

**3g**

$^{19}\text{F}$  NMR (376 MHz,  $\text{CDCl}_3$ )

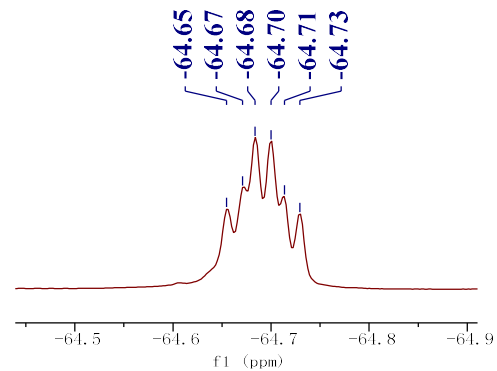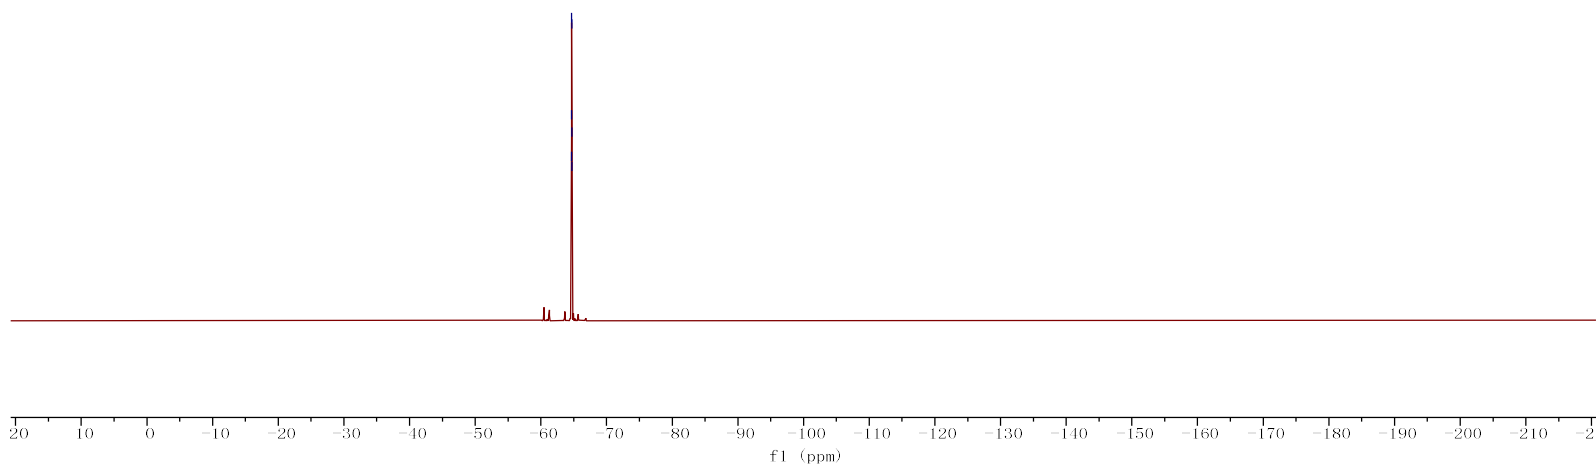

9x  
 3.62  
 3.62  
 3.62  
 3.60  
 3.59  
 3.58  
 3.57  
 3.55  
 3.03  
 3.02  
 3.02  
 3.01  
 3.00  
 2.99  
 2.98  
 2.56  
 2.56  
 2.55  
 2.55  
 2.54  
 2.54  
 2.53  
 2.52  
 2.51  
 2.18  
 2.17  
 2.16  
 2.16  
 2.15  
 2.14  
 2.14  
 2.13  
 2.12  
 2.03  
 2.00  
 1.99  
 1.98  
 1.97  
 1.97  
 1.96  
 1.94  
 1.91  
 1.90  
 1.88  
 1.88  
 1.86  
 1.86  
 1.83  
 1.81  
 1.80

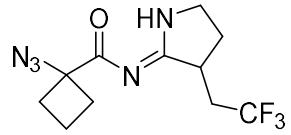

**3h**

<sup>1</sup>H NMR (400 MHz, CDCl<sub>3</sub>)

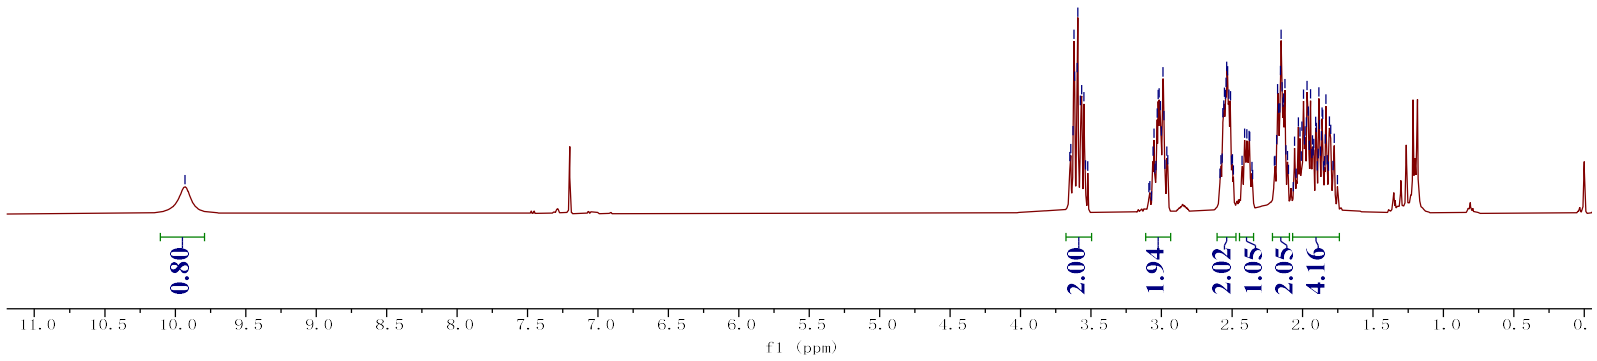



9XJM105CW-CHF, 12. f1

— 186.28

— 174.95

— 131.03

— 128.28

— 125.53

— 122.78

— 68.21

— 45.54

— 39.46

— 39.43

— 39.40

— 39.37

— 36.24

— 35.95

— 35.67

— 35.38

— 31.42

— 31.23

— 27.30

— 14.70

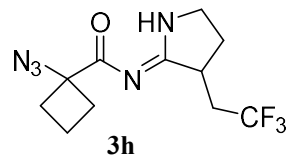

<sup>13</sup>C NMR (100 MHz, CDCl<sub>3</sub>)

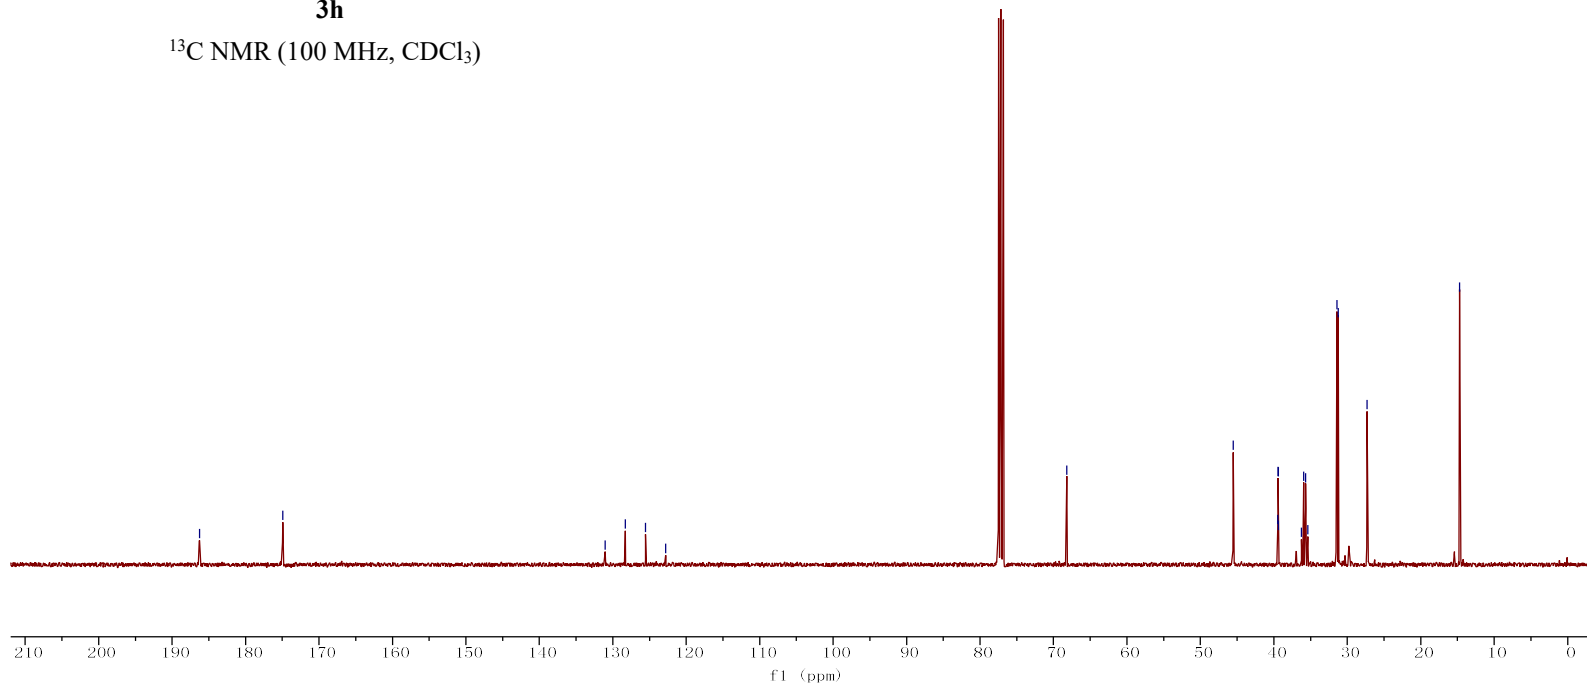

9xjm105cw-2.11.fid

-64.68  
-64.71  
-64.74

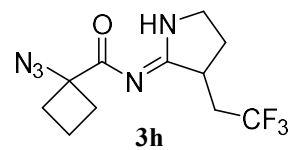

<sup>19</sup>F NMR (376 MHz, CDCl<sub>3</sub>)

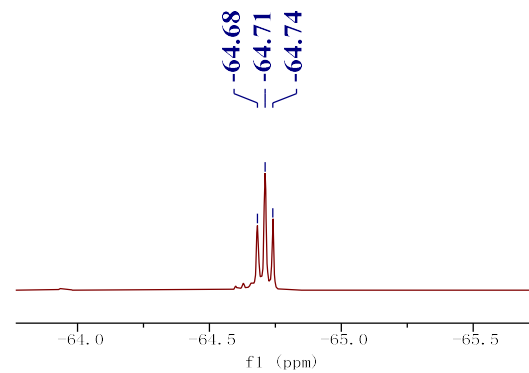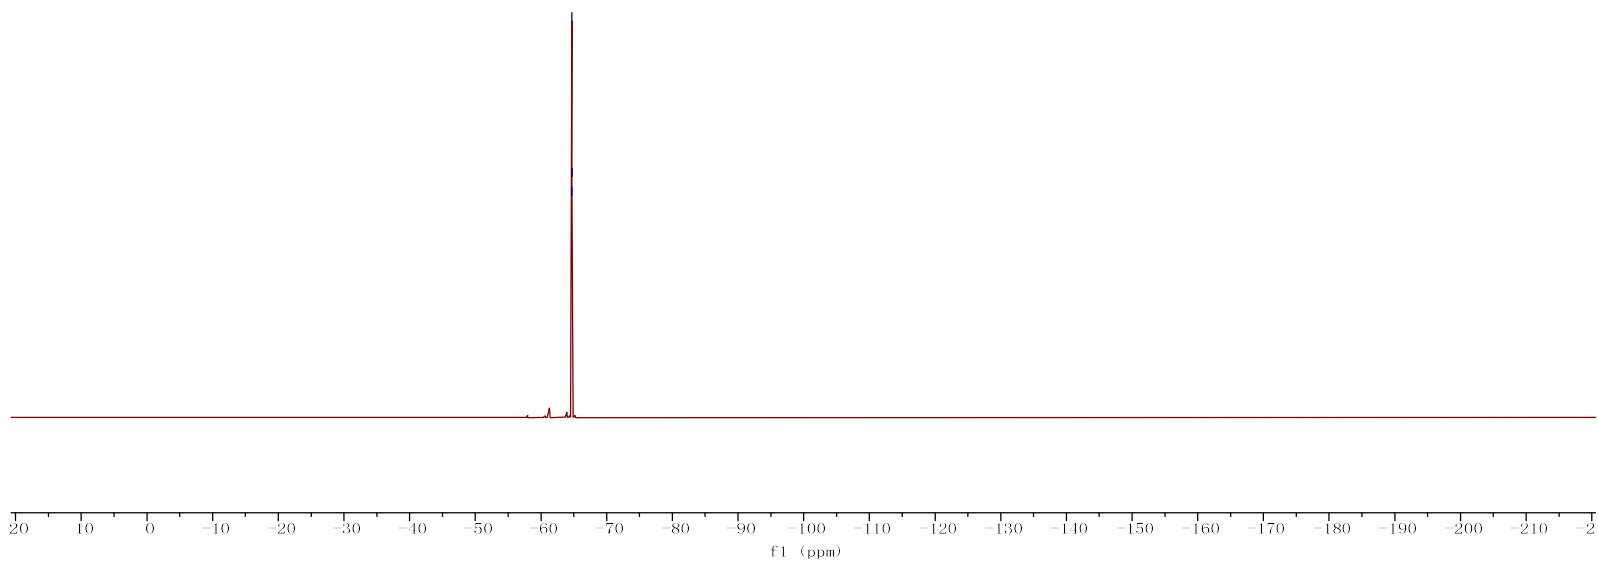

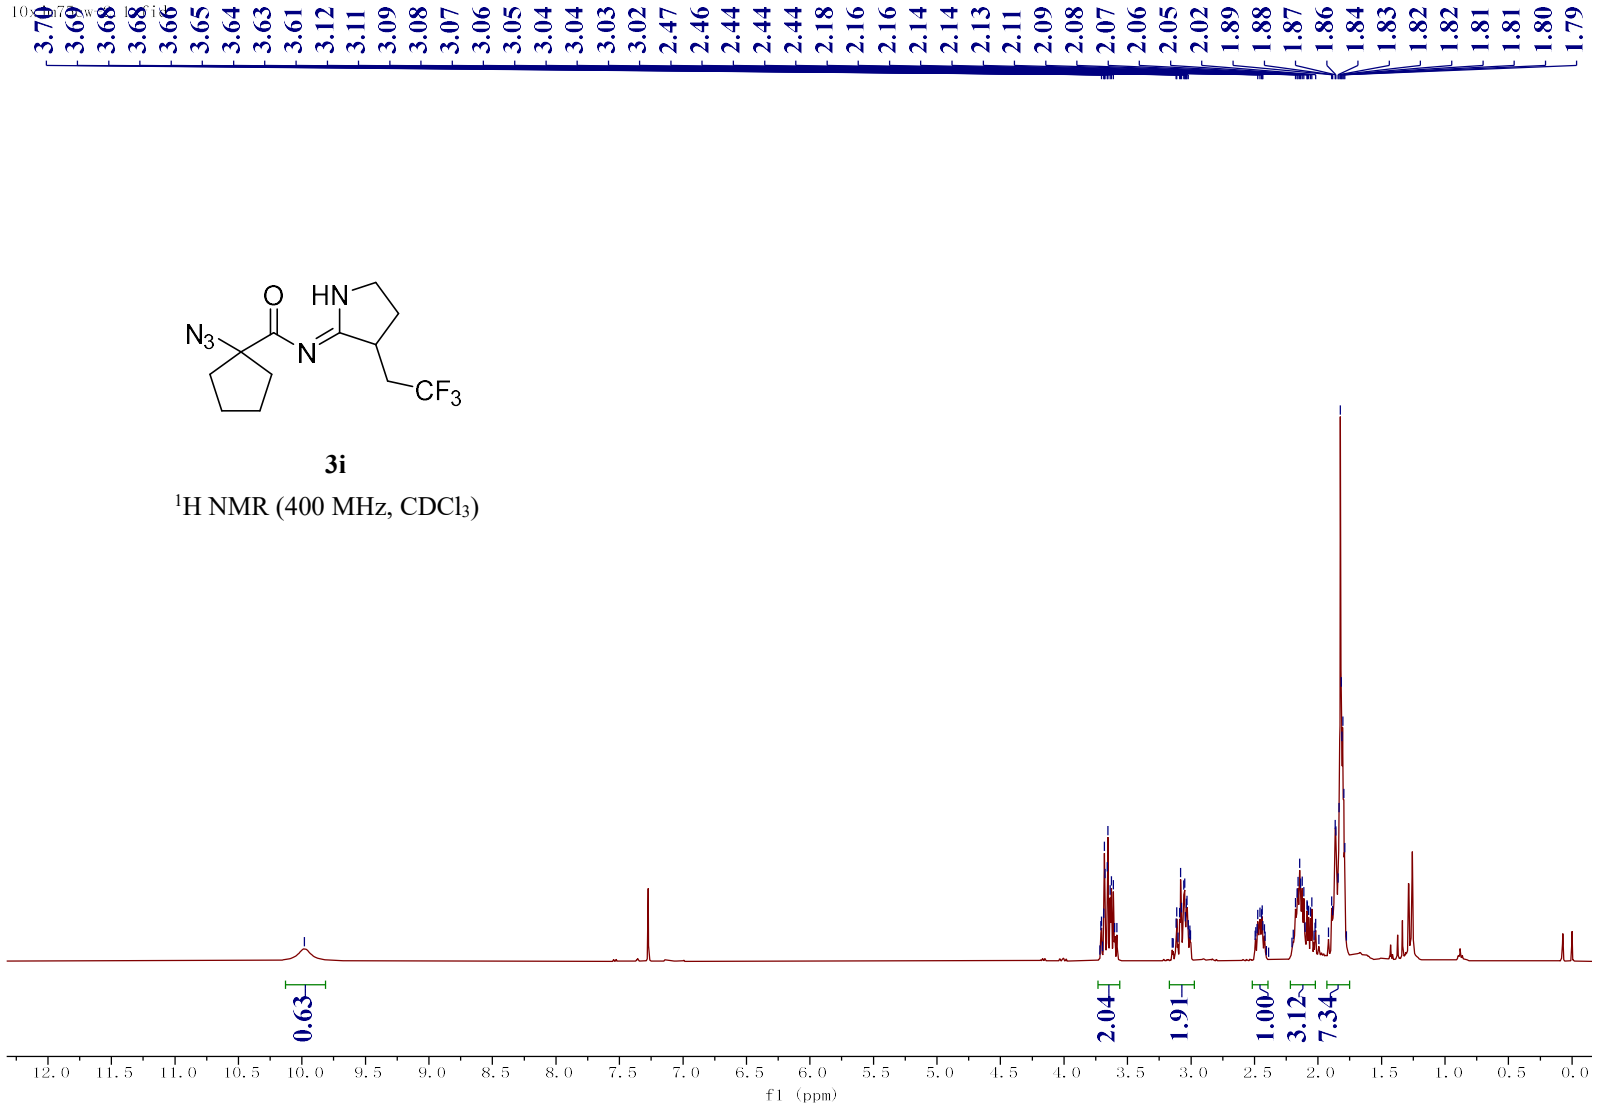

10xjm75ew-ehf.12.fid

— 187.71  
— 174.62

✓ 131.05  
✓ 128.30  
✓ 125.55  
✓ 122.80

— 76.97

45.48  
39.43  
39.40  
39.37  
39.34  
36.81  
36.60  
36.23  
35.95  
35.66  
35.37  
27.31  
24.74  
24.74

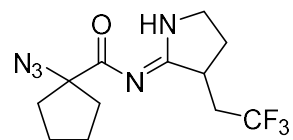

**3i**

<sup>13</sup>C NMR (100 MHz, CDCl<sub>3</sub>)

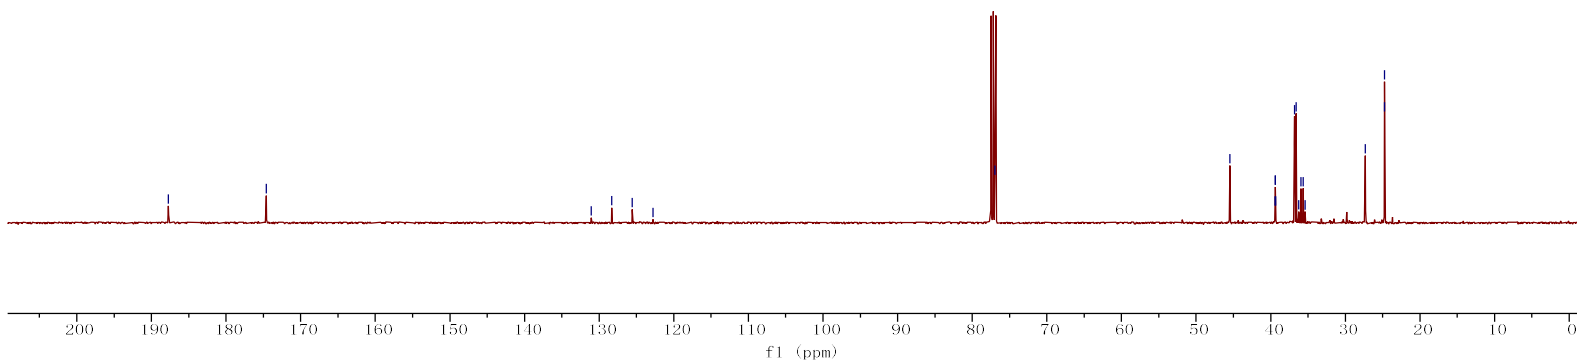

10xjm75ew-chf. 11. fid

-64.69  
-64.72  
-64.75

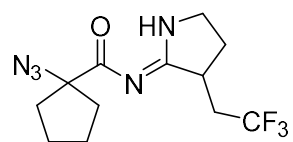

**3i**

<sup>19</sup>F NMR (376 MHz, CDCl<sub>3</sub>)

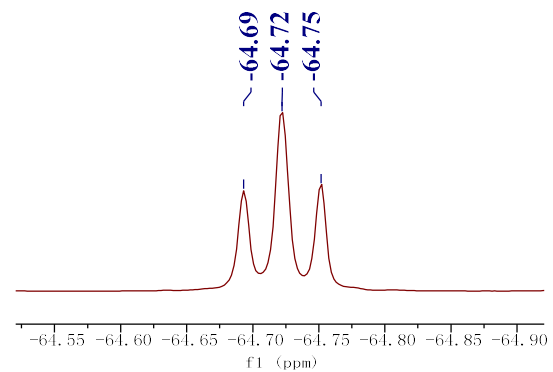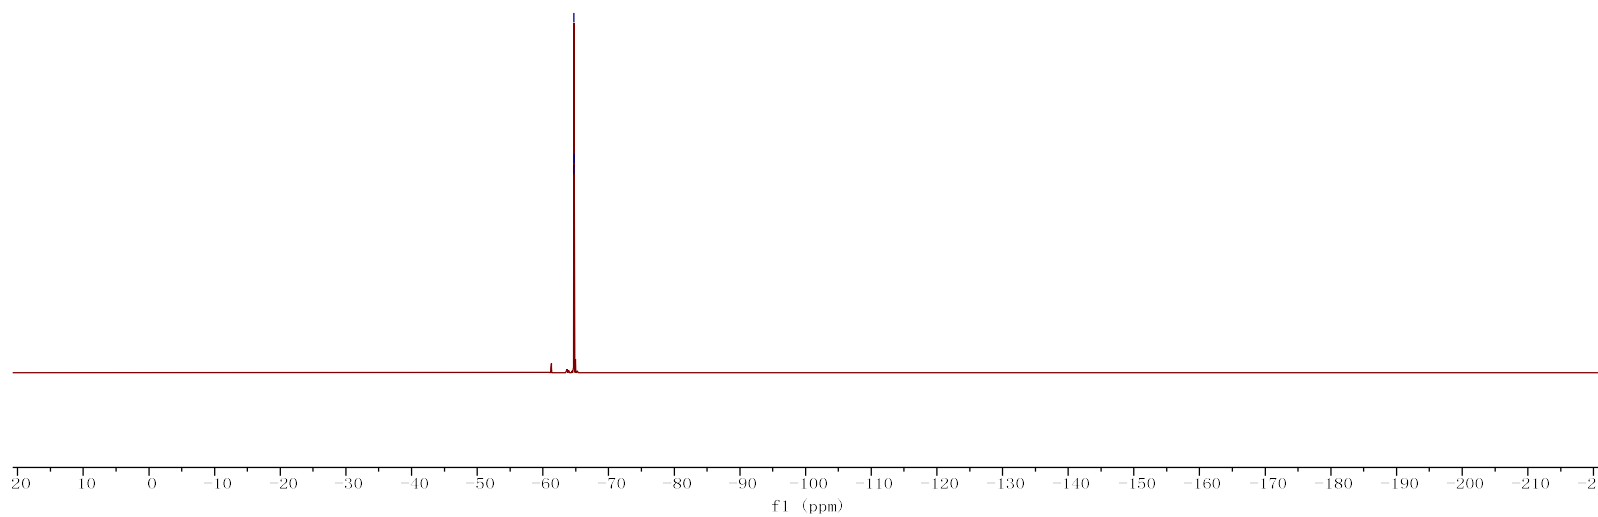

10xjml110cw.19.fid

10.01  
4.14  
4.12  
4.10  
4.07  
4.05  
4.04  
3.94  
3.92  
3.73  
3.71  
3.68  
3.65  
3.63  
3.61  
3.12  
3.09  
3.07  
3.05  
3.02  
2.99  
2.61  
2.59  
2.58  
2.56  
2.54  
2.51  
2.49  
2.47  
2.46  
2.44  
2.15  
2.14  
2.12  
2.10  
2.09  
2.07  
2.06  
2.04  
1.94  
1.91  
1.88  
1.86  
1.83

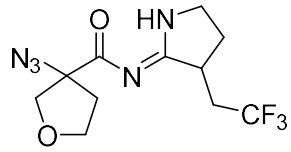

**3j**

<sup>1</sup>H NMR (400 MHz, CDCl<sub>3</sub>)

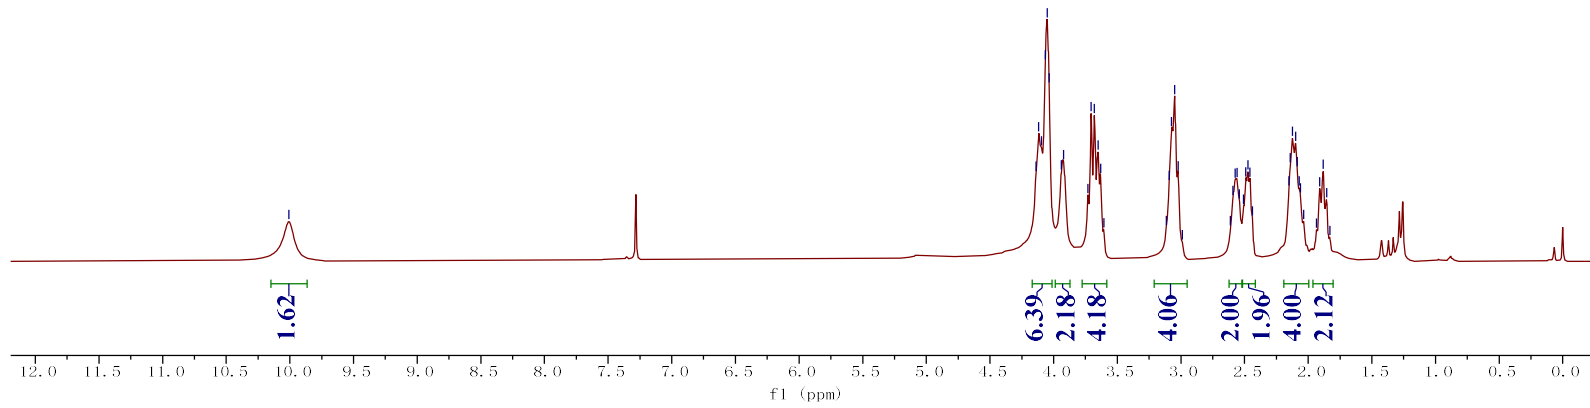

10xjml10ew-e, 10, fid

184.32  
184.30  
— 175.16

130.92  
128.17  
125.42  
122.67

76.05  
75.67  
75.66  
68.48  
68.47  
45.63  
39.50  
39.47  
37.13  
36.96  
36.14  
35.85  
35.57  
35.28  
27.19

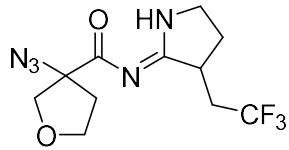

**3j**

<sup>13</sup>C NMR (100 MHz, CDCl<sub>3</sub>)

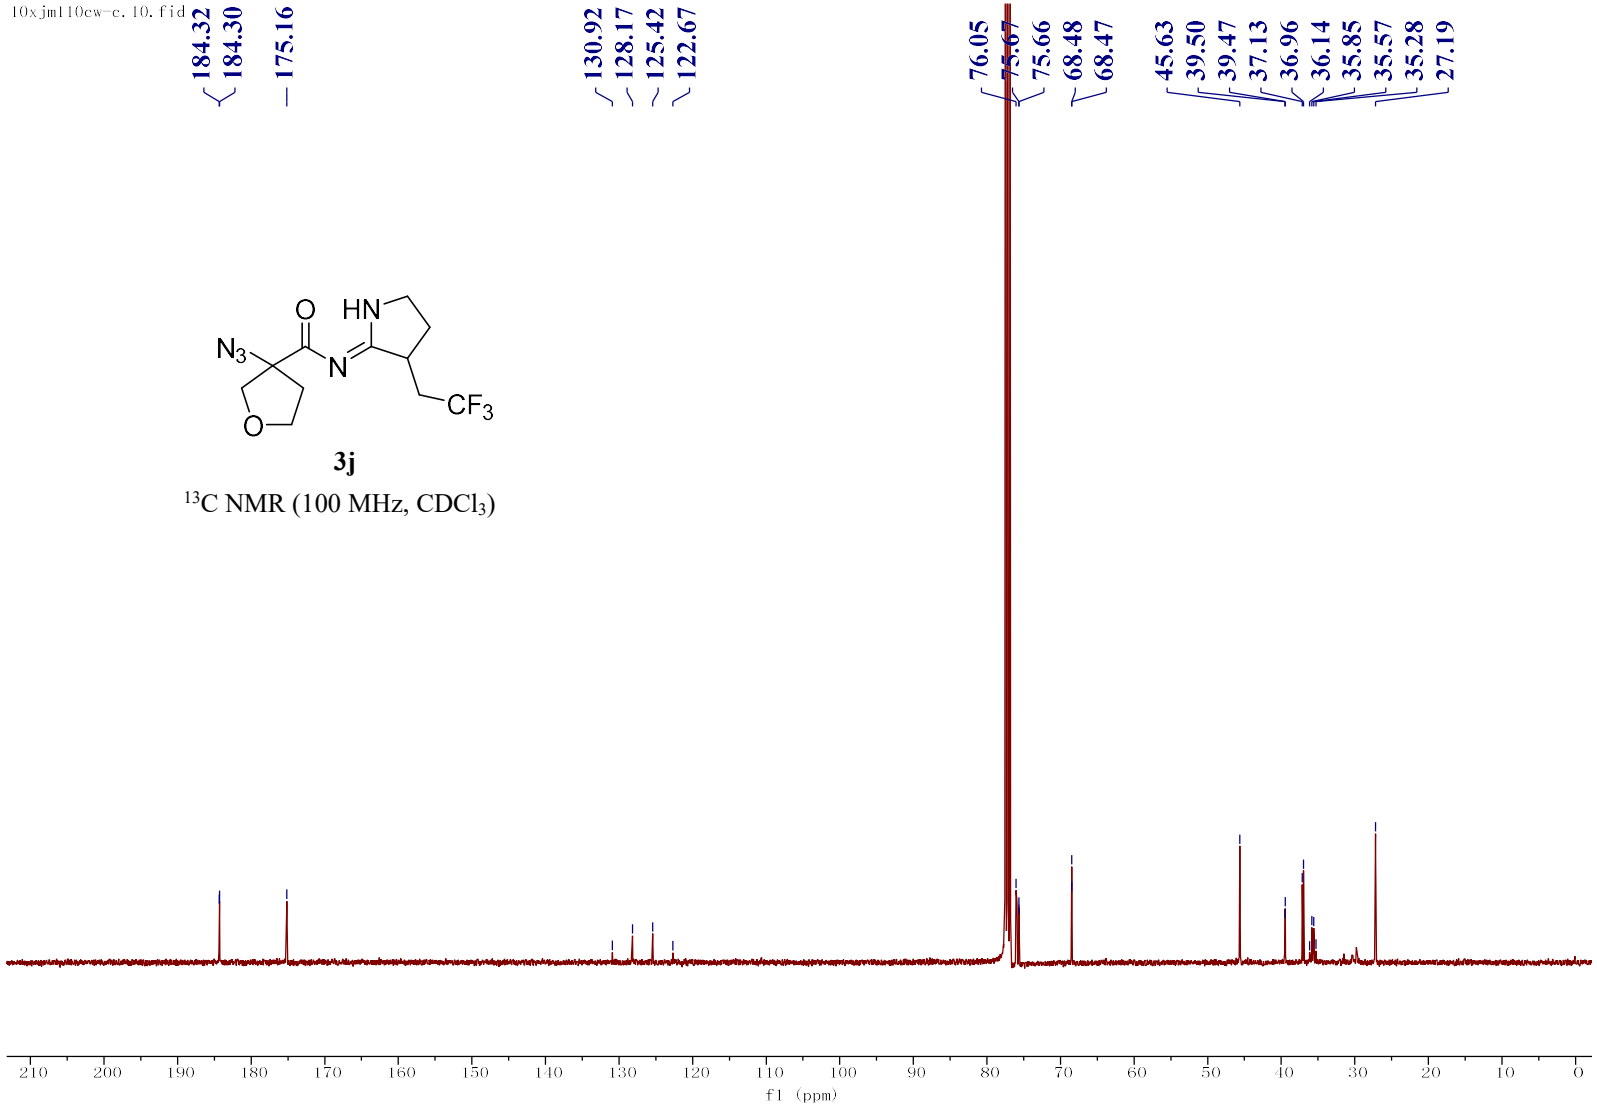

10xjml10cw.11.fid

-64.70  
-64.73  
-64.75  
-64.78

-64.70  
-64.73  
-64.75  
-64.78

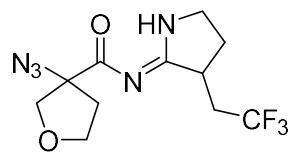

**3j**

<sup>19</sup>F NMR (376 MHz, CDCl<sub>3</sub>)

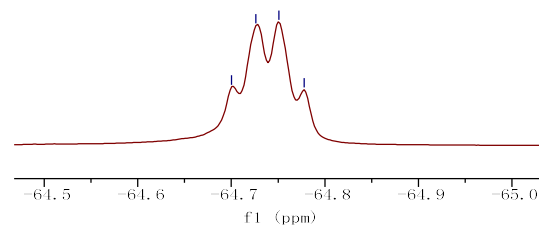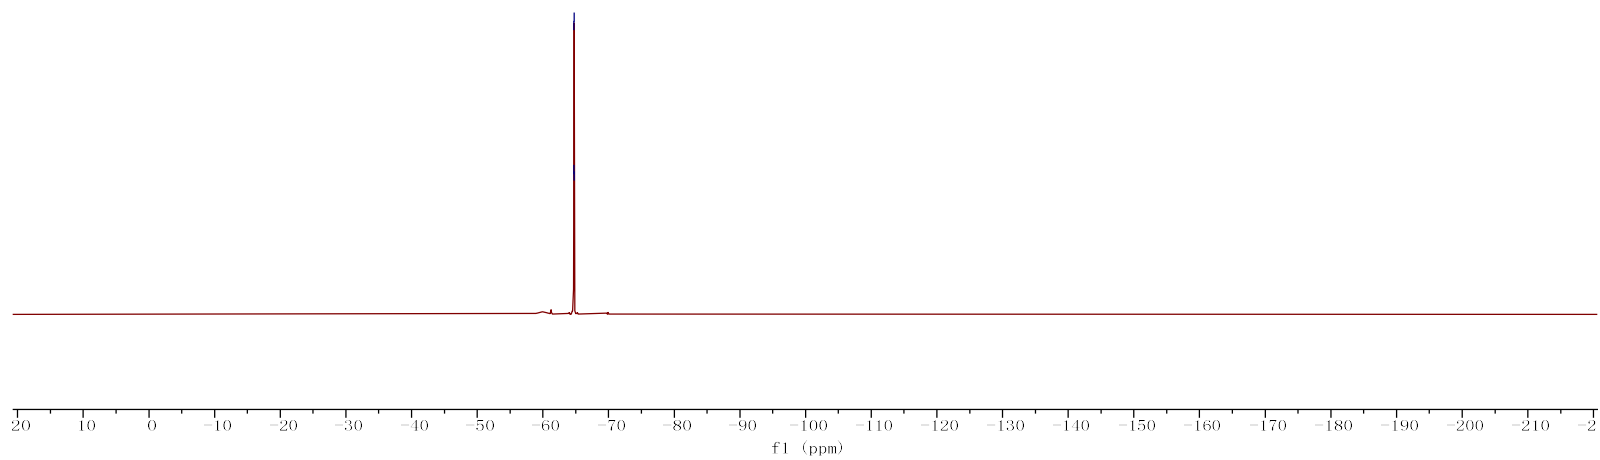



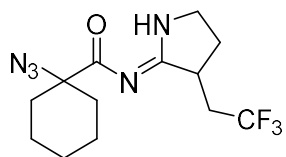

**3k**

<sup>1</sup>H NMR (400 MHz, CDCl<sub>3</sub>)

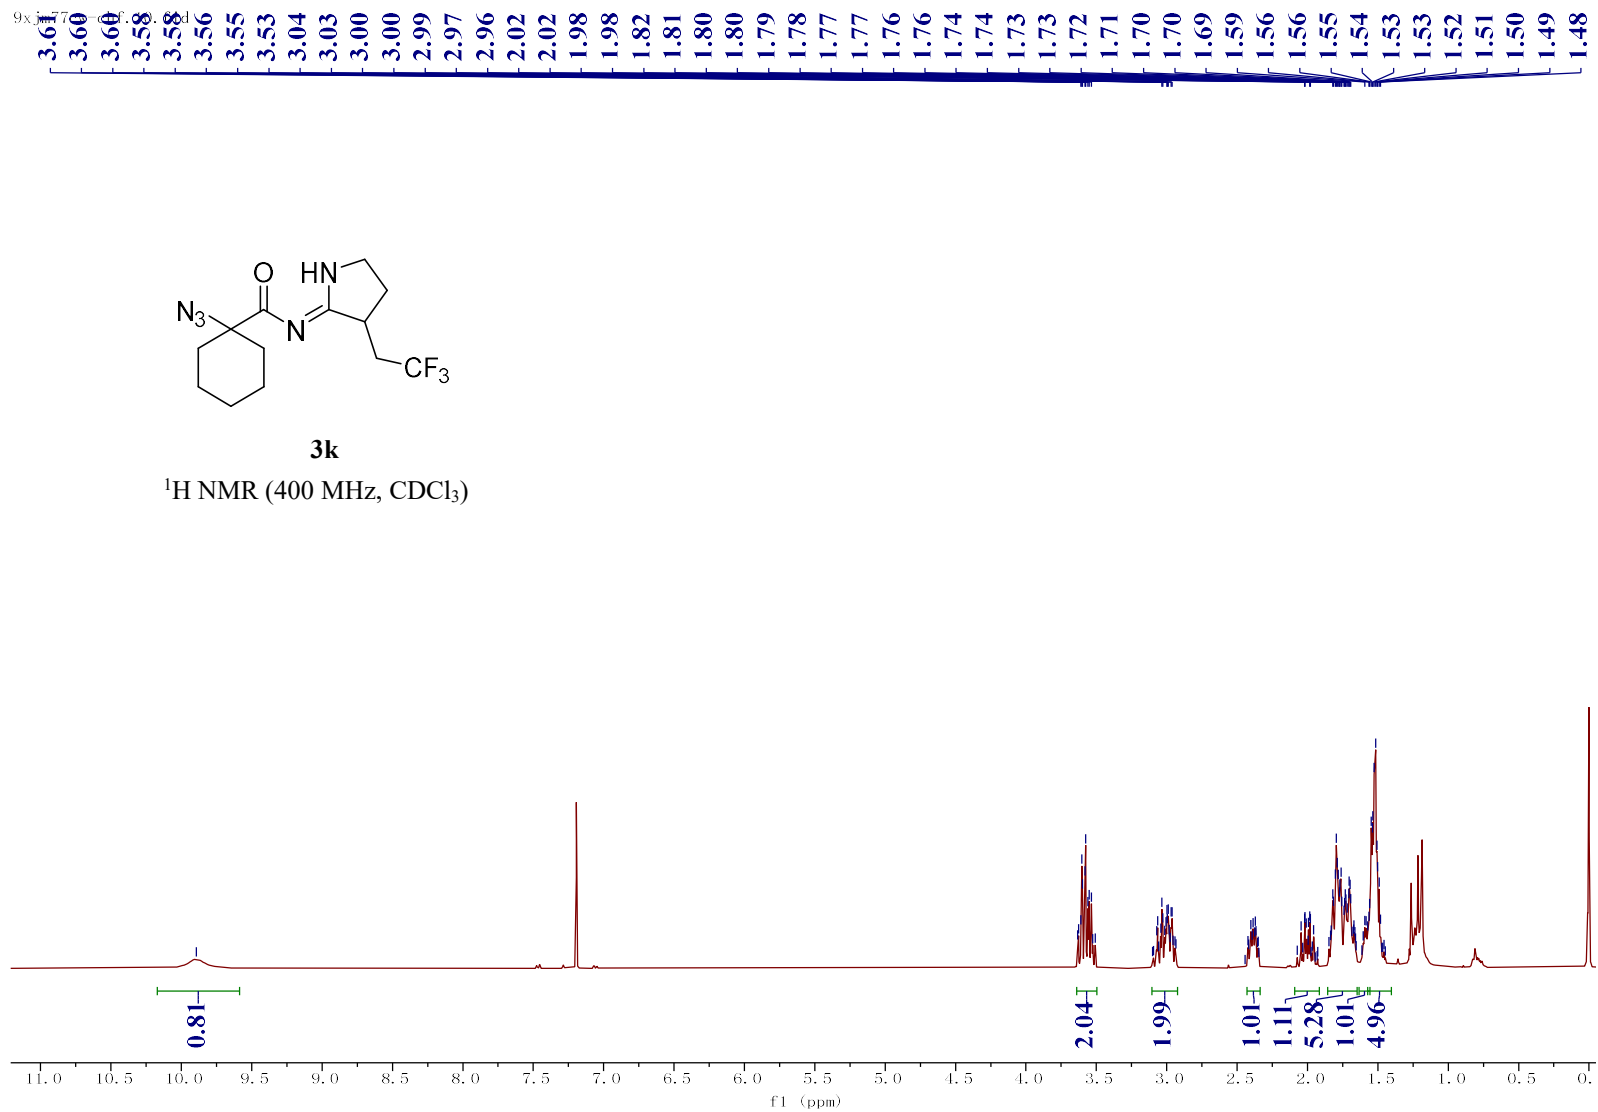

9xjm77cw-ehf. 11. f1z

— 187.77

— 174.99

— 131.08

— 128.33

— 125.59

— 122.84

— 68.93

— 45.48

— 39.47

— 39.44

— 39.41

— 39.38

— 36.28

— 35.99

— 35.70

— 35.42

— 32.32

— 32.23

— 27.35

— 25.28

— 22.11

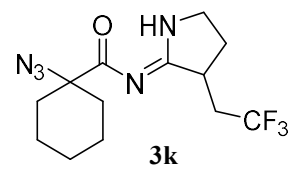

<sup>13</sup>C NMR (100 MHz, CDCl<sub>3</sub>)

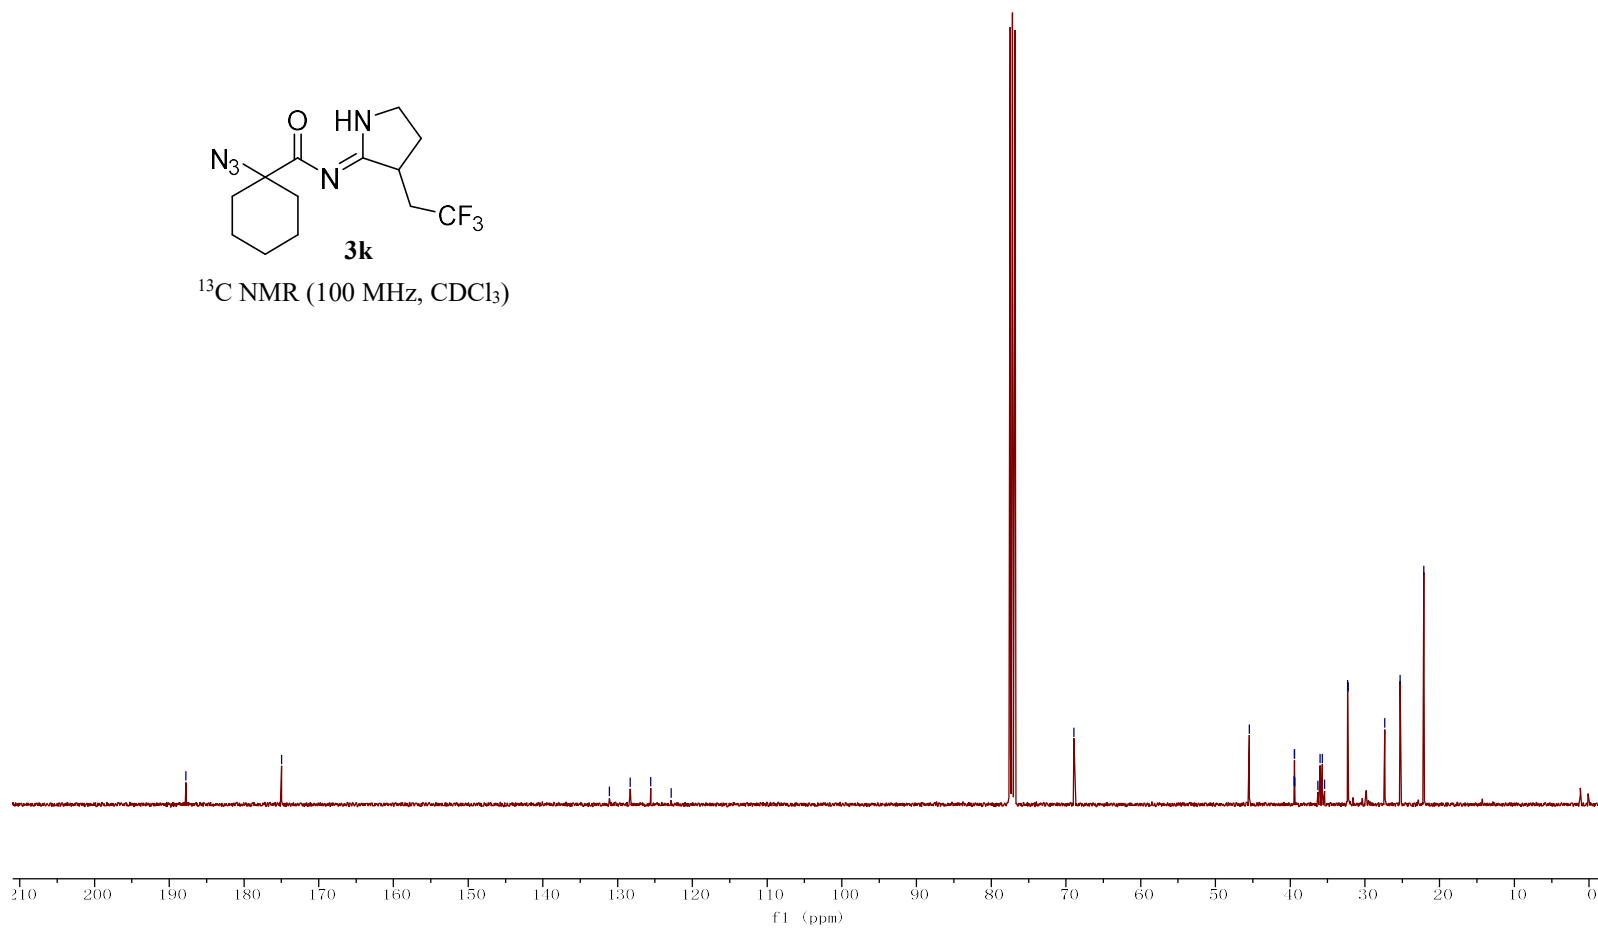

9xjm77ew-chn. 12. fid

-64.68  
-64.71  
-64.74

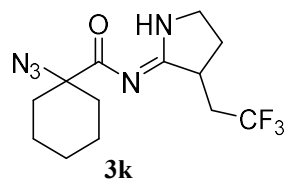

<sup>19</sup>F NMR (376 MHz, CDCl<sub>3</sub>)

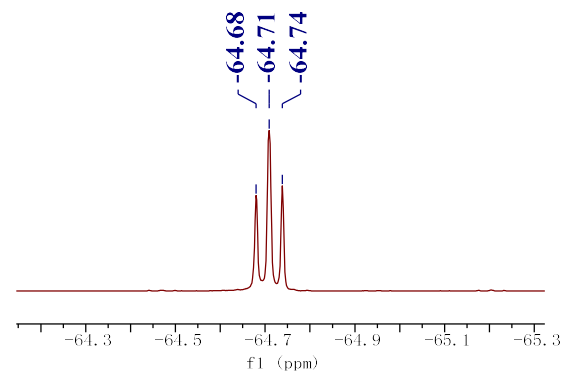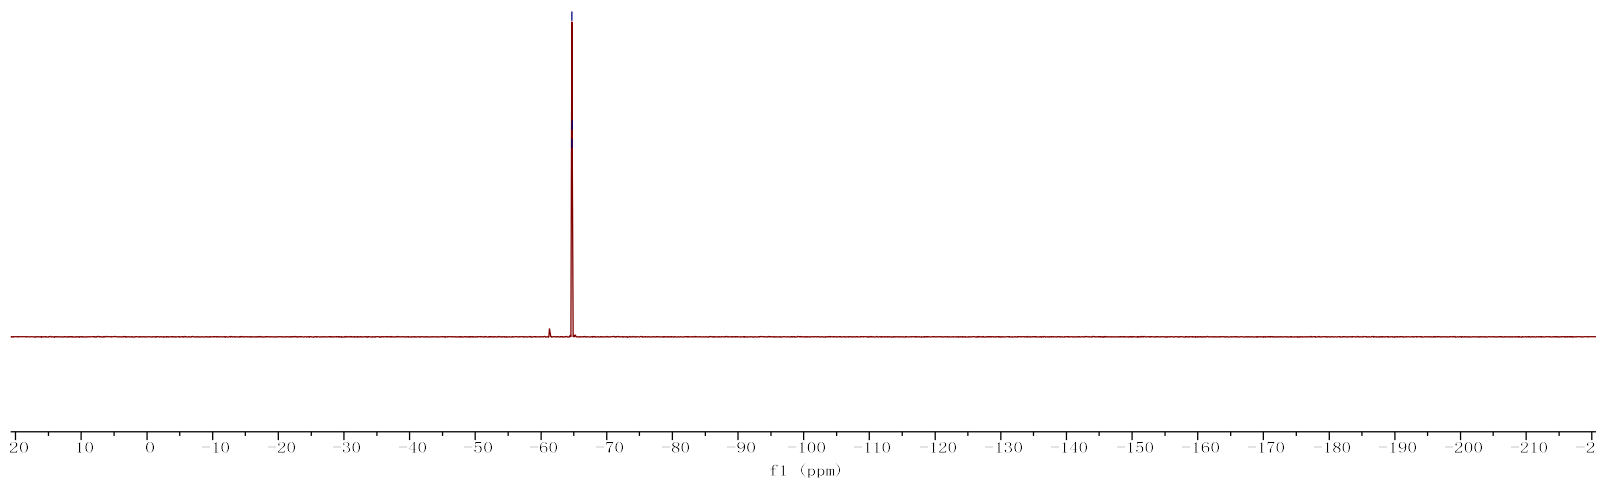

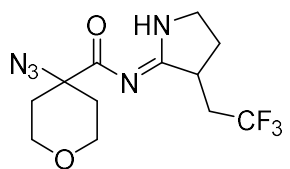

**31**

<sup>1</sup>H NMR (400 MHz, CDCl<sub>3</sub>)

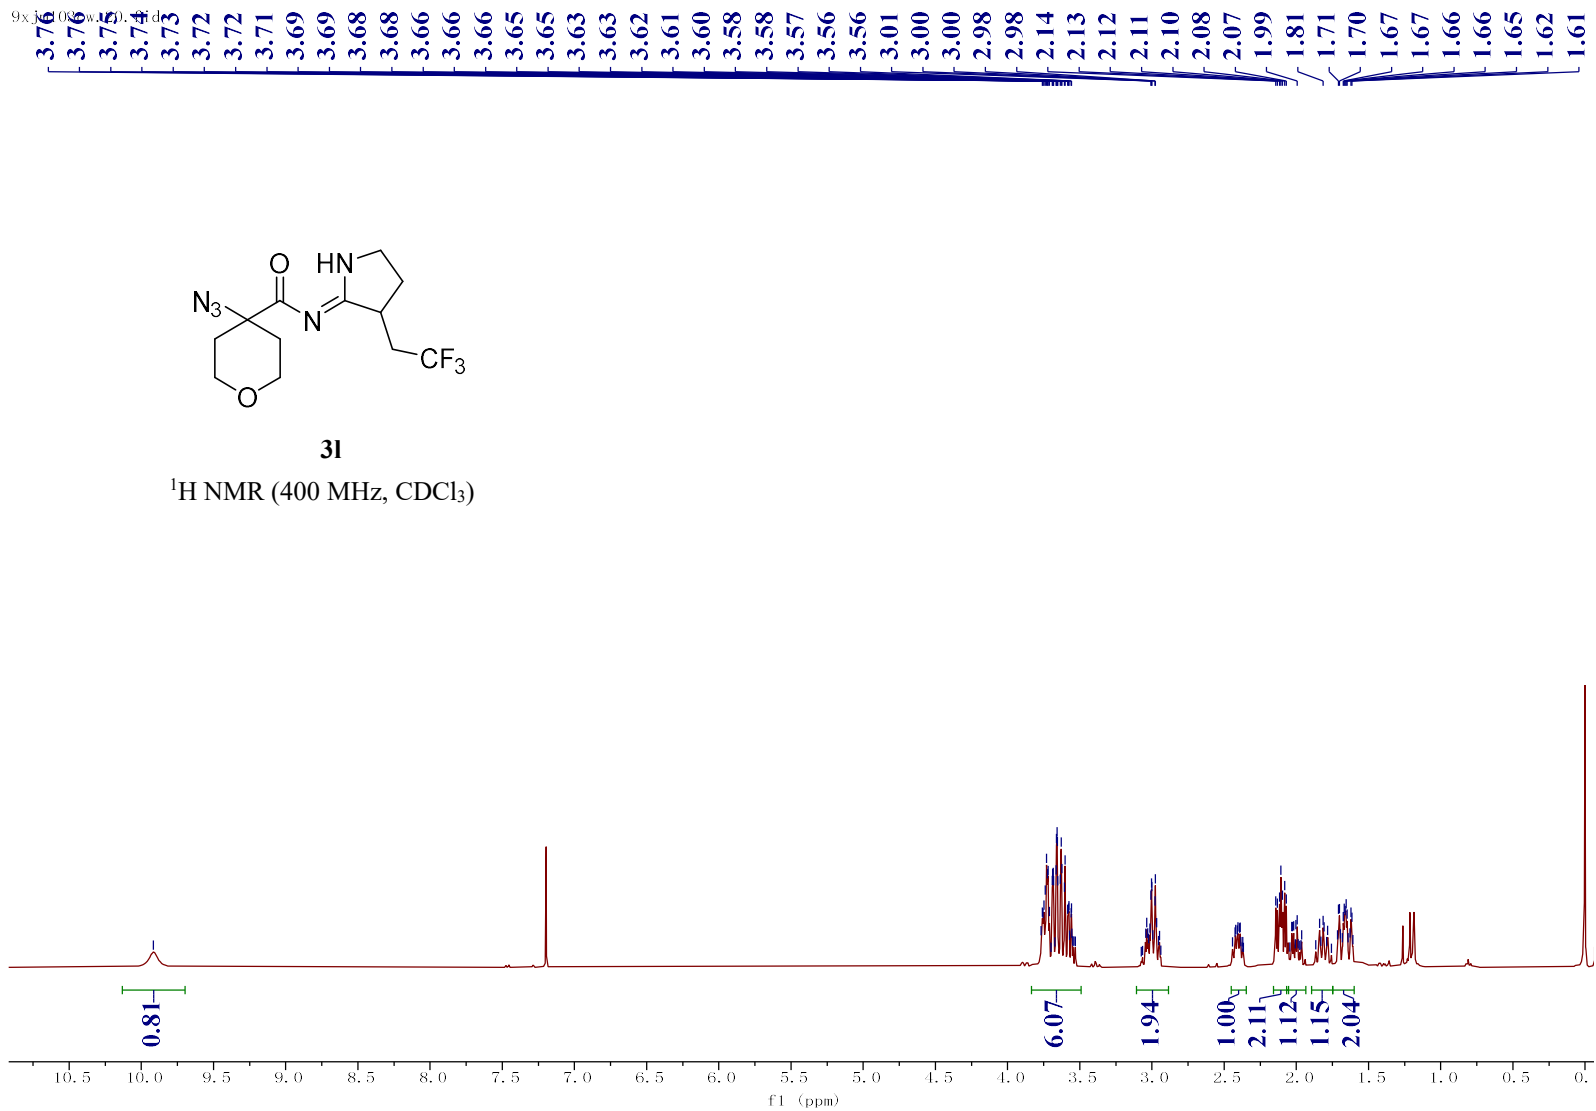

9xjm103ew. 22. fid

— 185.89

— 175.40

— 130.99

— 128.24

— 125.49

— 122.74

— 65.95

— 64.07

— 64.05

— 45.58

— 39.54

— 39.51

— 39.48

— 39.45

— 36.24

— 35.95

— 35.67

— 35.38

— 32.40

— 32.32

— 27.31

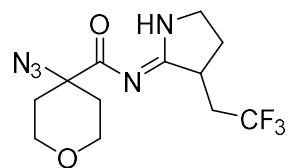

**31**

$^{13}\text{C}$  NMR (100 MHz,  $\text{CDCl}_3$ )

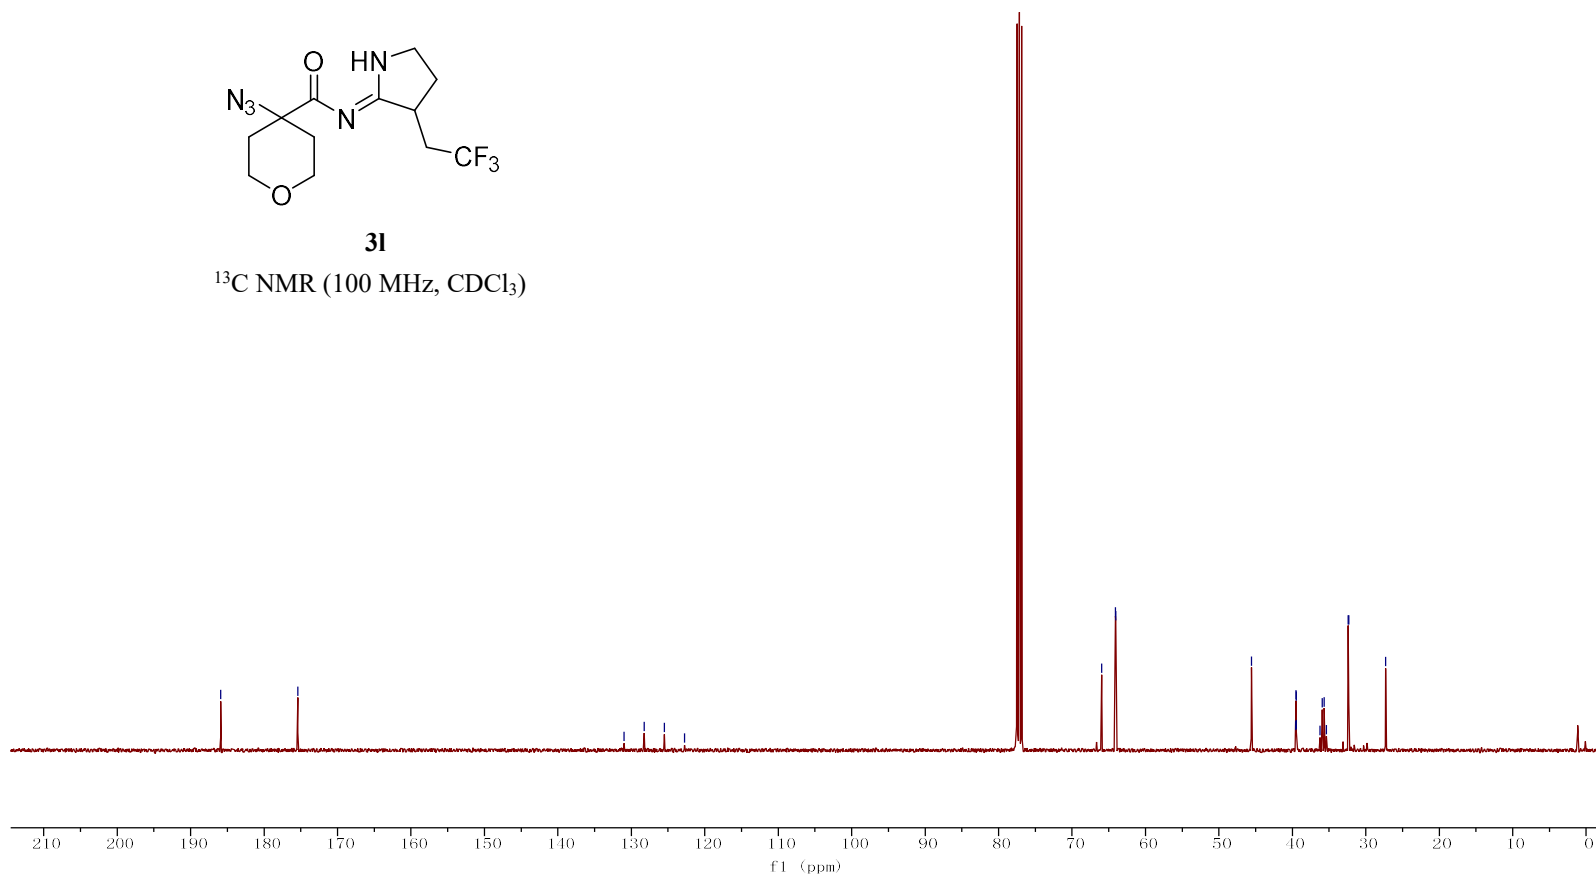

9xjm103ew. 21. fid

-64.71  
-64.74  
-64.77

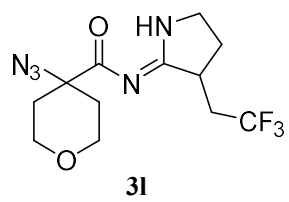

<sup>19</sup>F NMR (376 MHz, CDCl<sub>3</sub>)

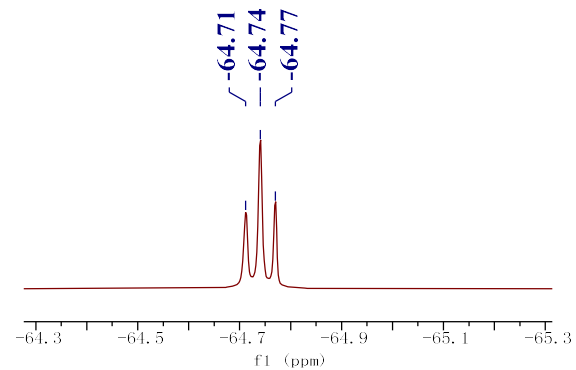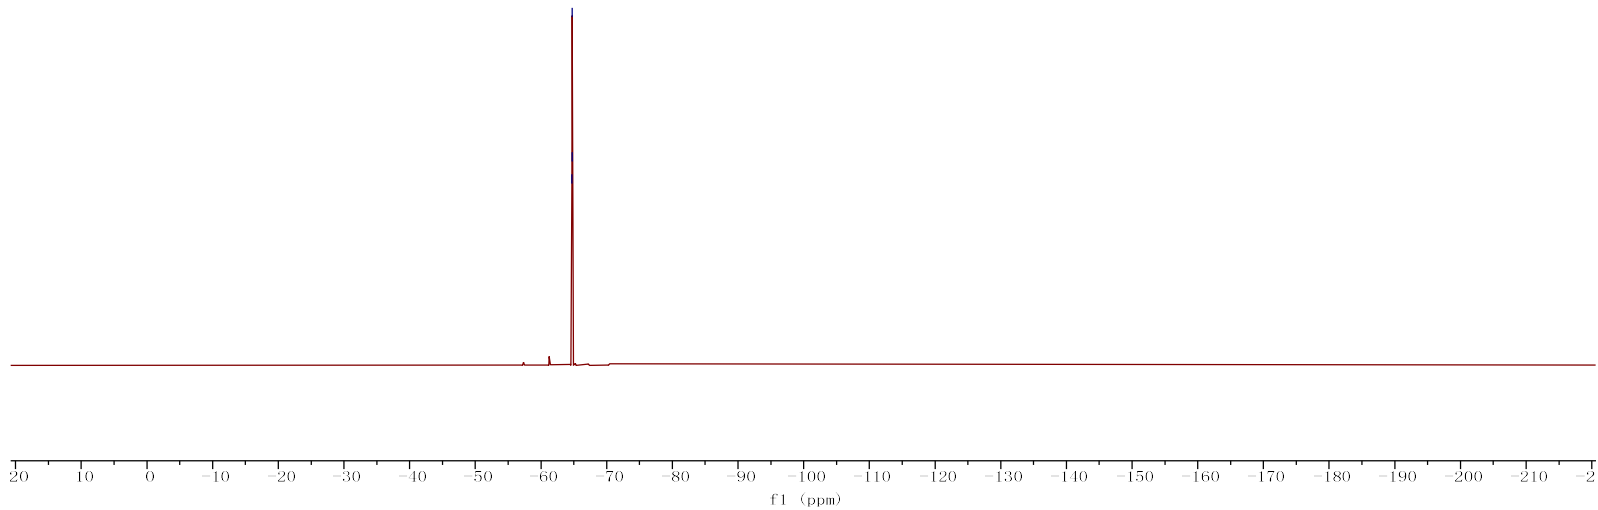

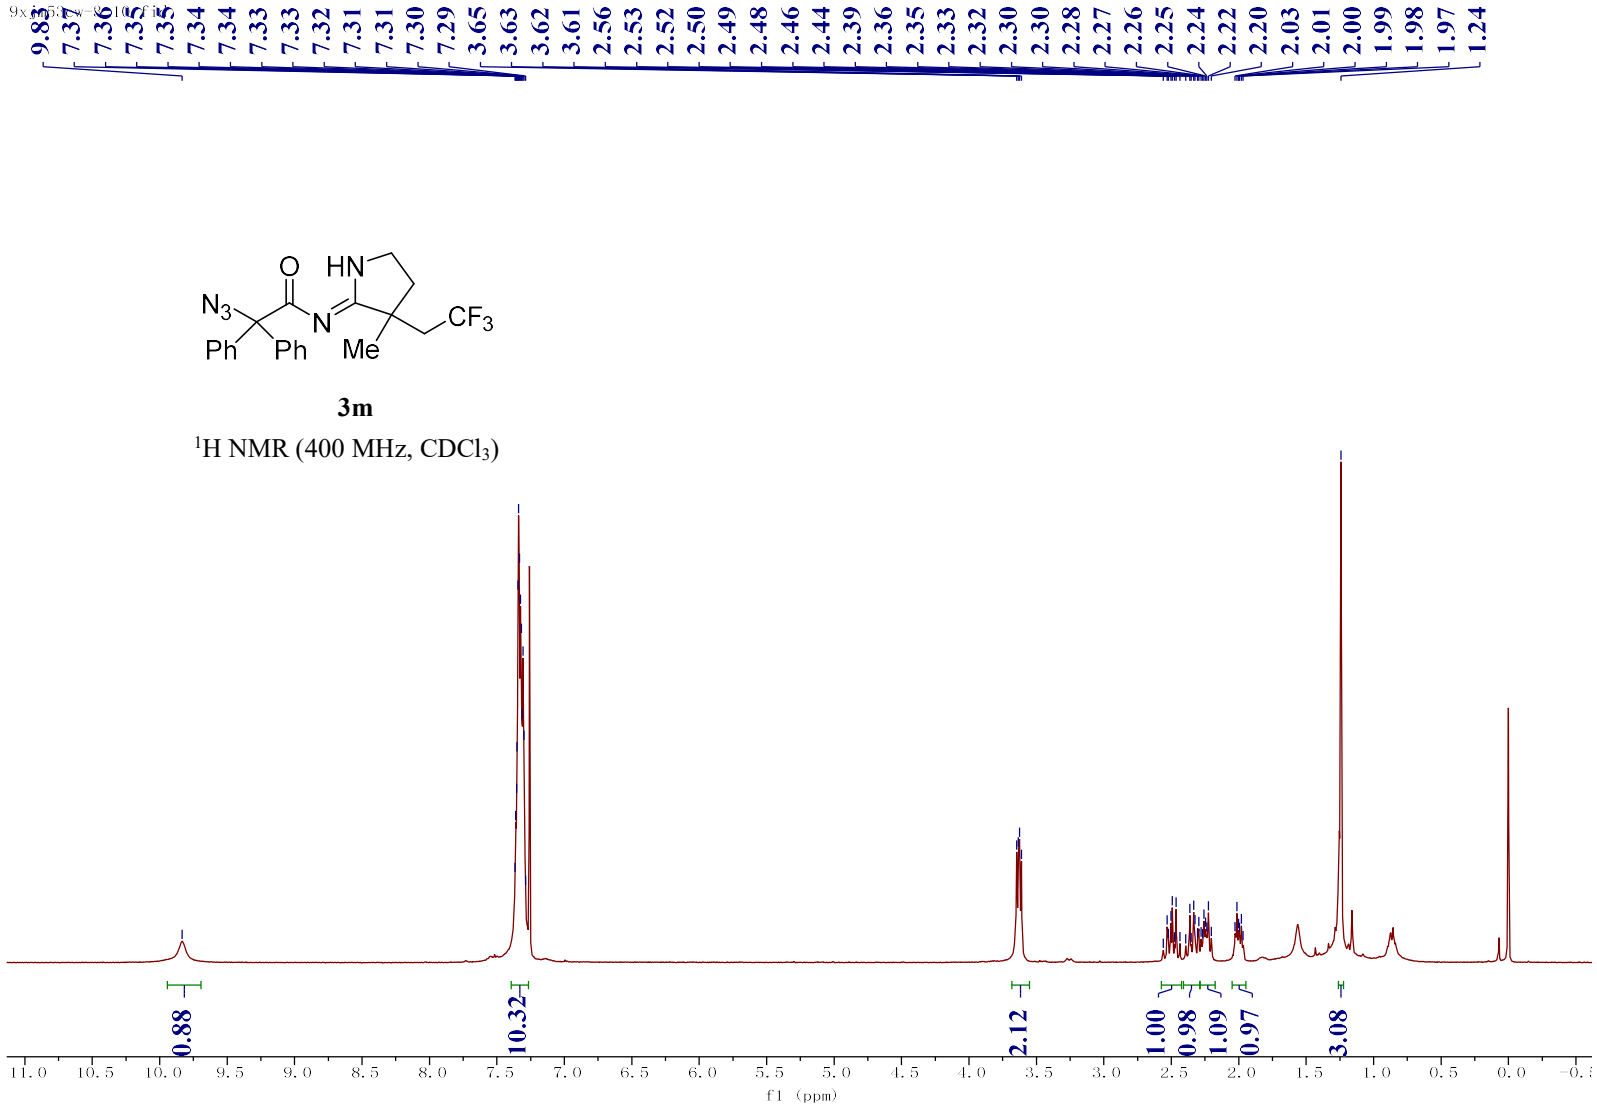

9xjm53cw-3\_1.fid

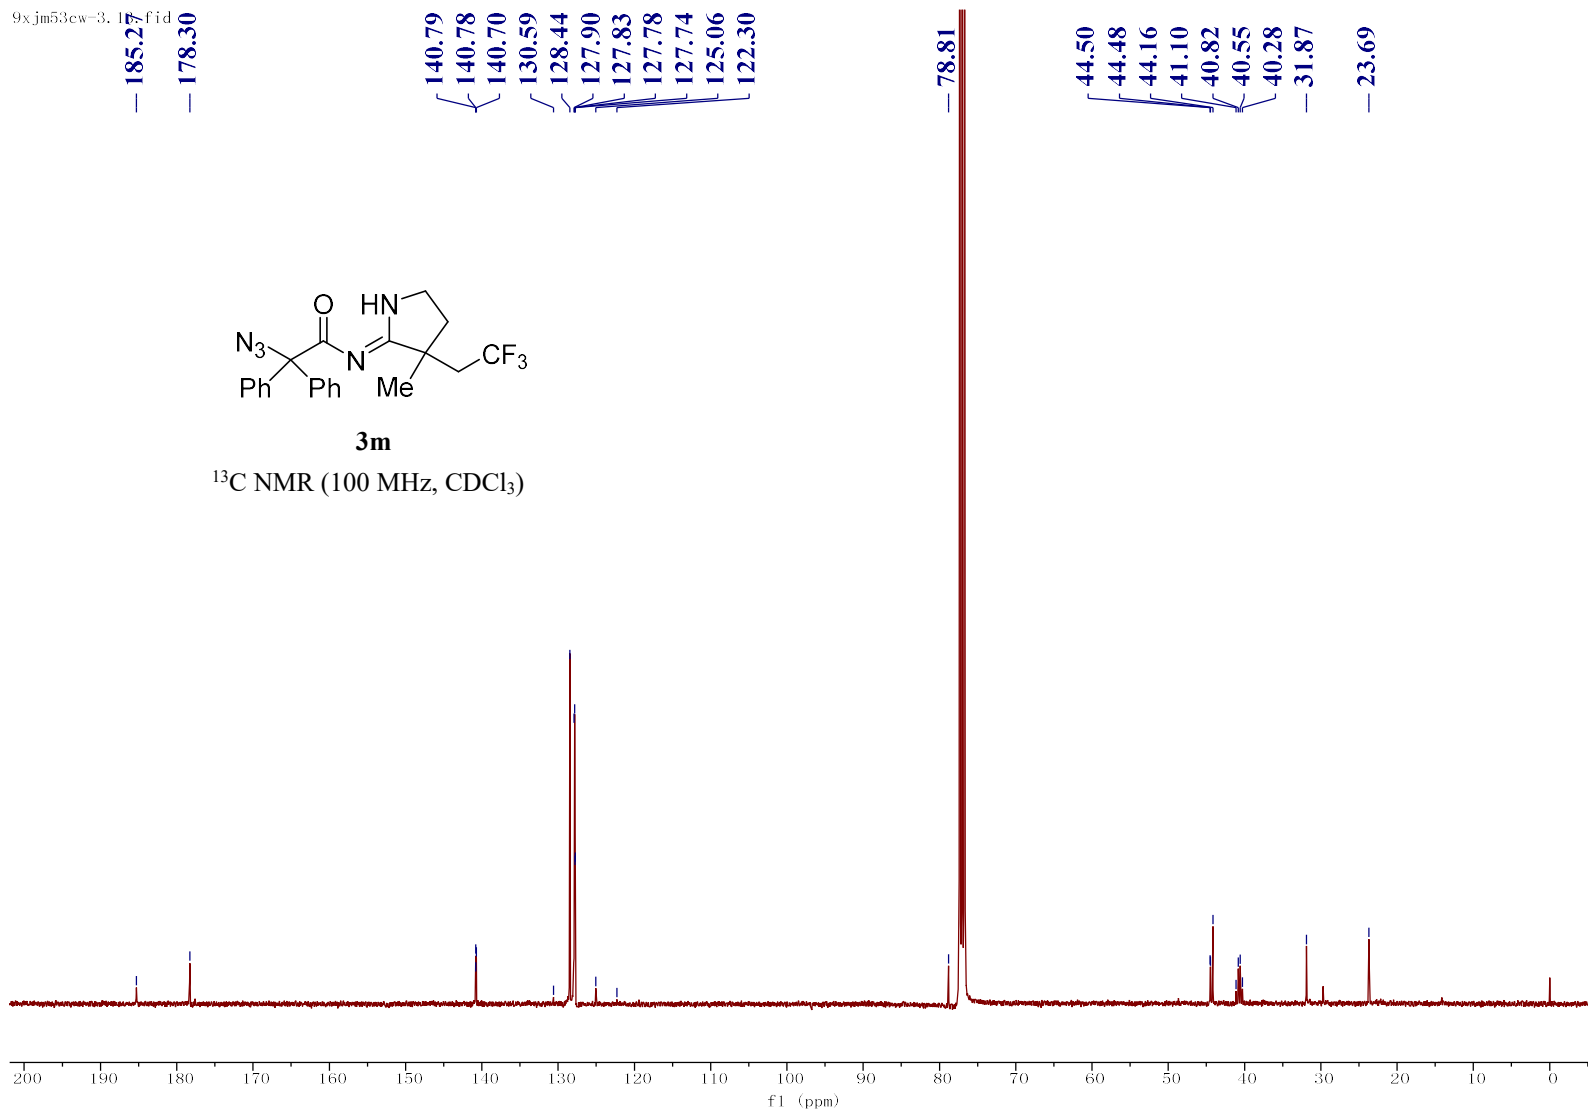



9xjm53cw-3\_12.fid

-60.35  
-60.38  
-60.41

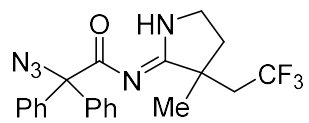

**3m**

<sup>19</sup>F NMR (376 MHz, CDCl<sub>3</sub>)

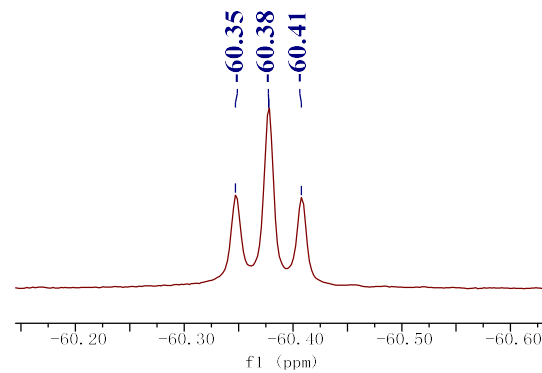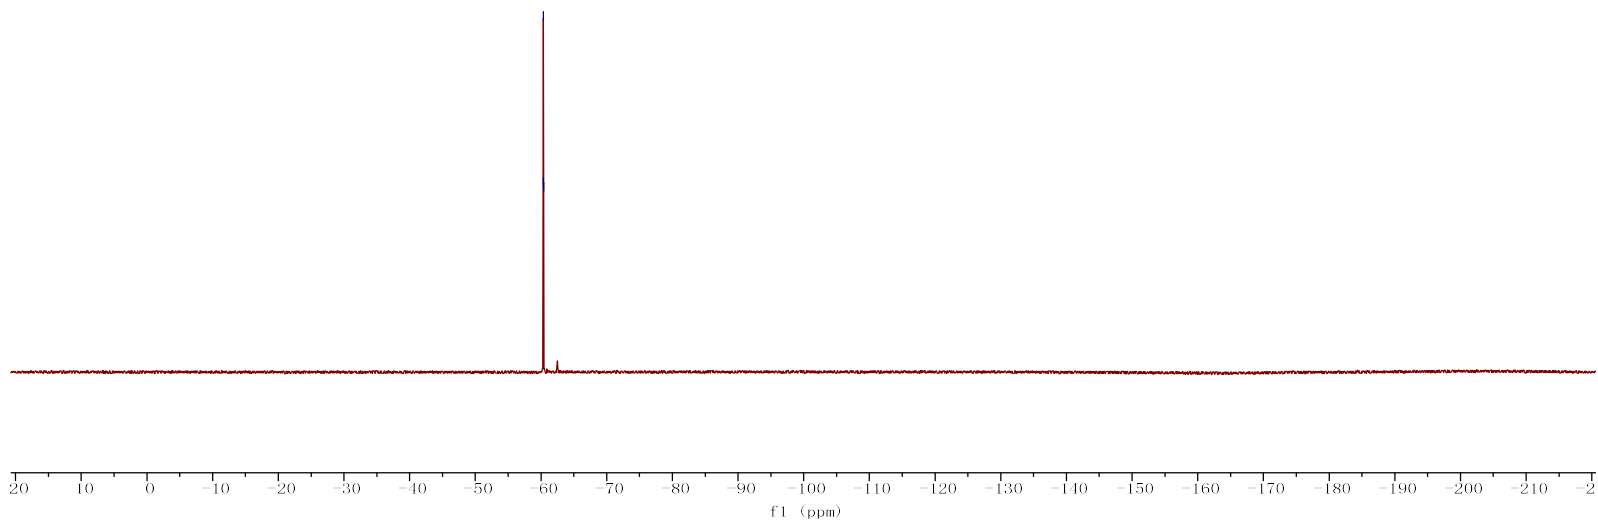

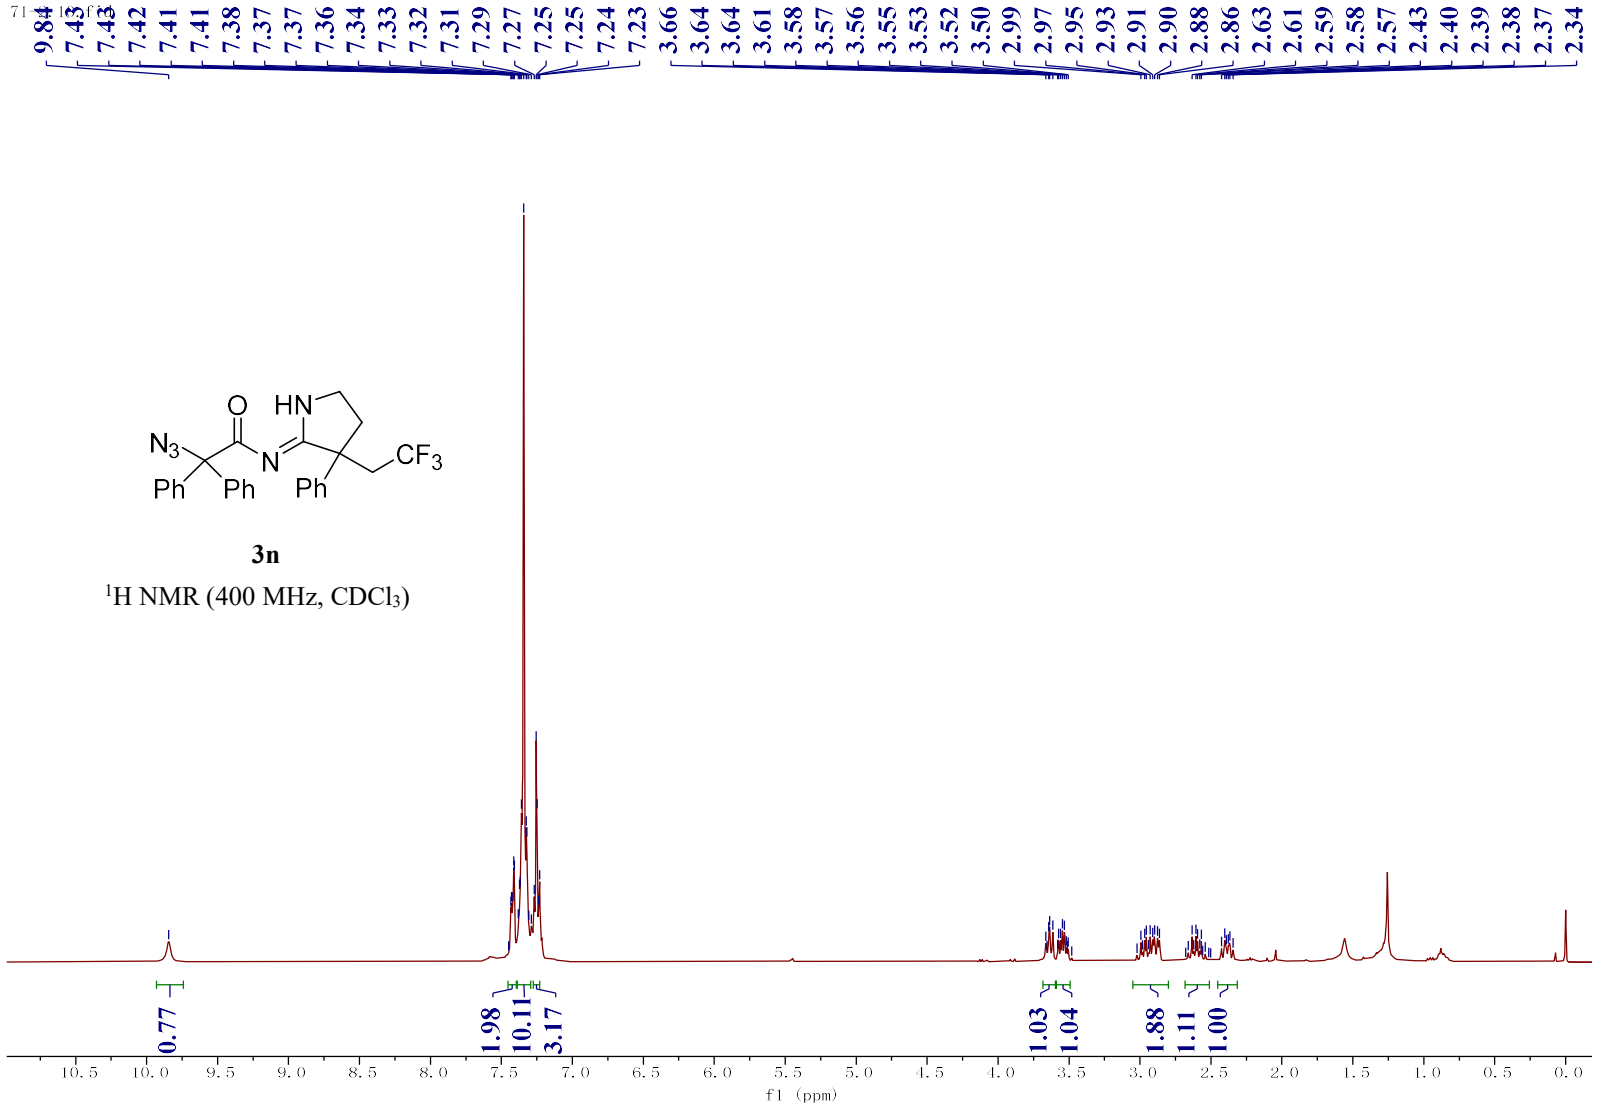

71-2. 12. fid

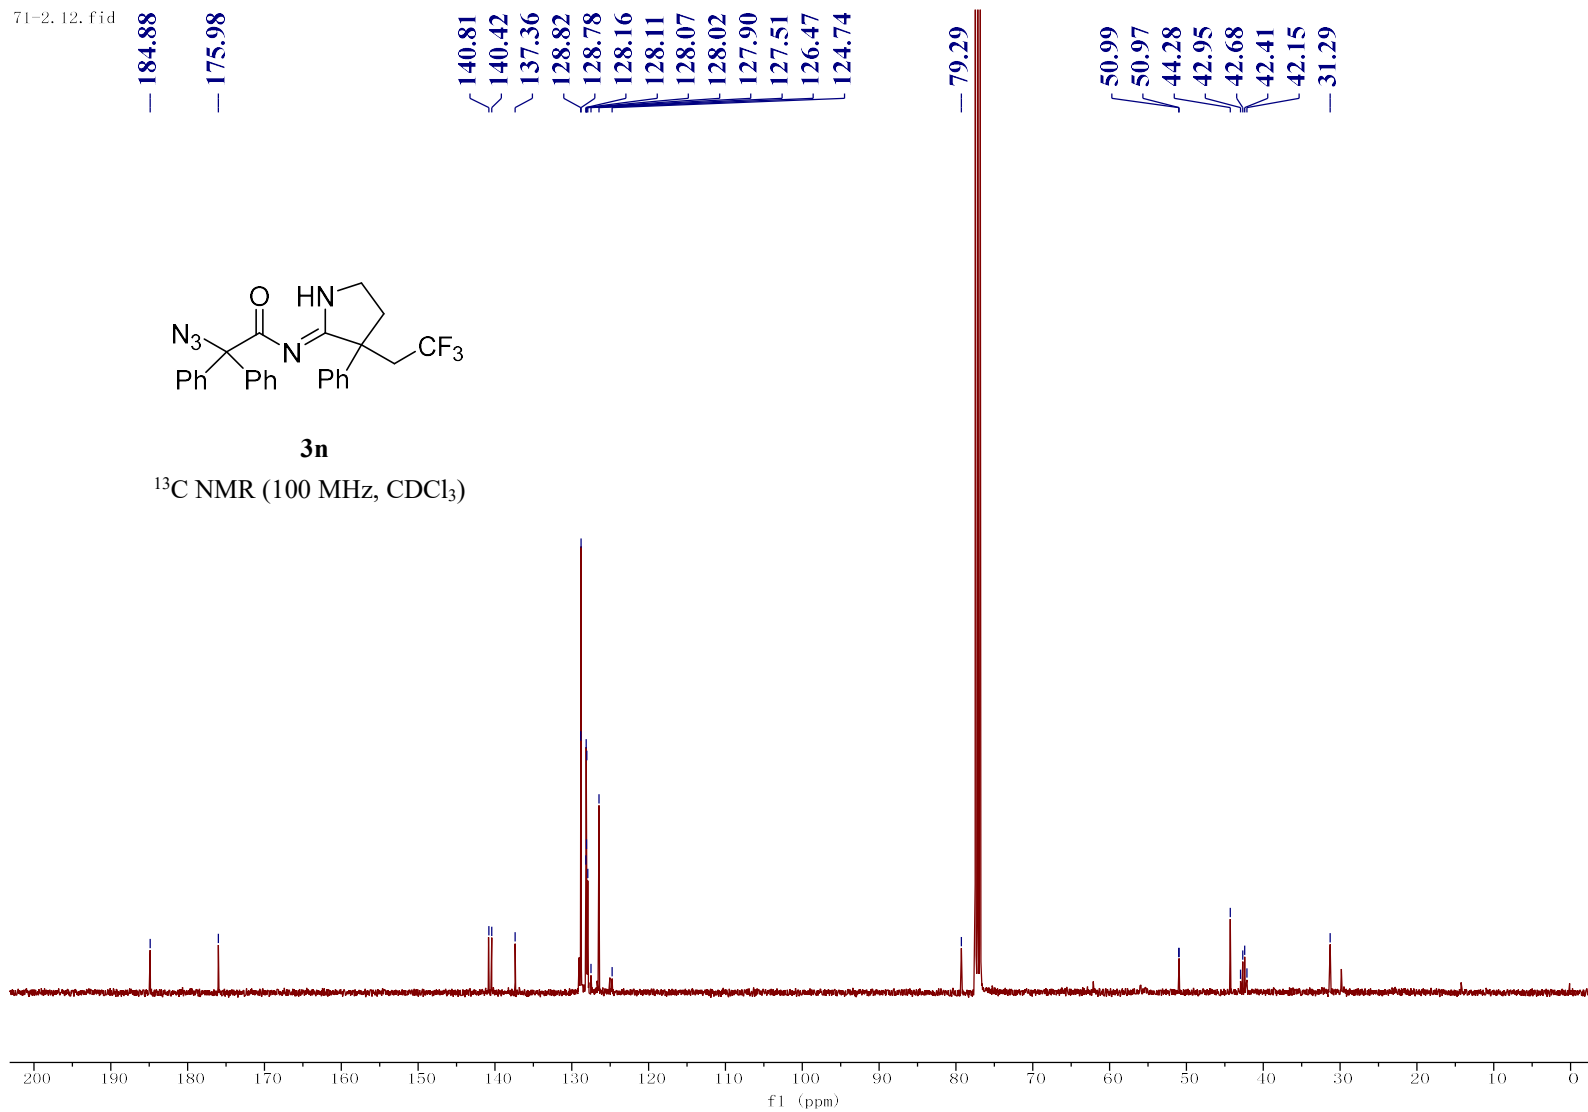

71-2. 11. fid

-60.23  
-60.25  
-60.28

-60.23  
-60.25  
-60.28

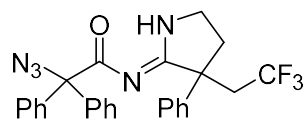

**3n**

<sup>19</sup>F NMR (376 MHz, CDCl<sub>3</sub>)

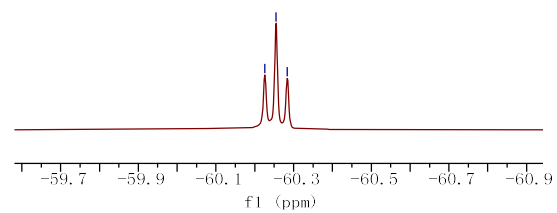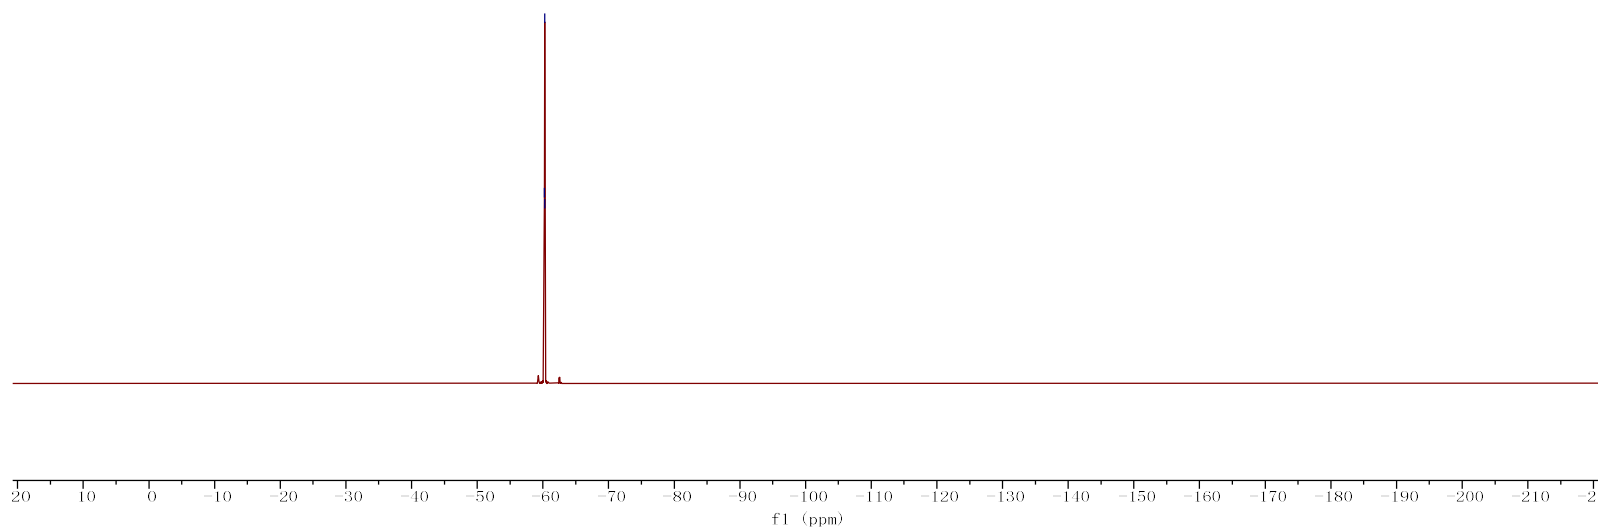

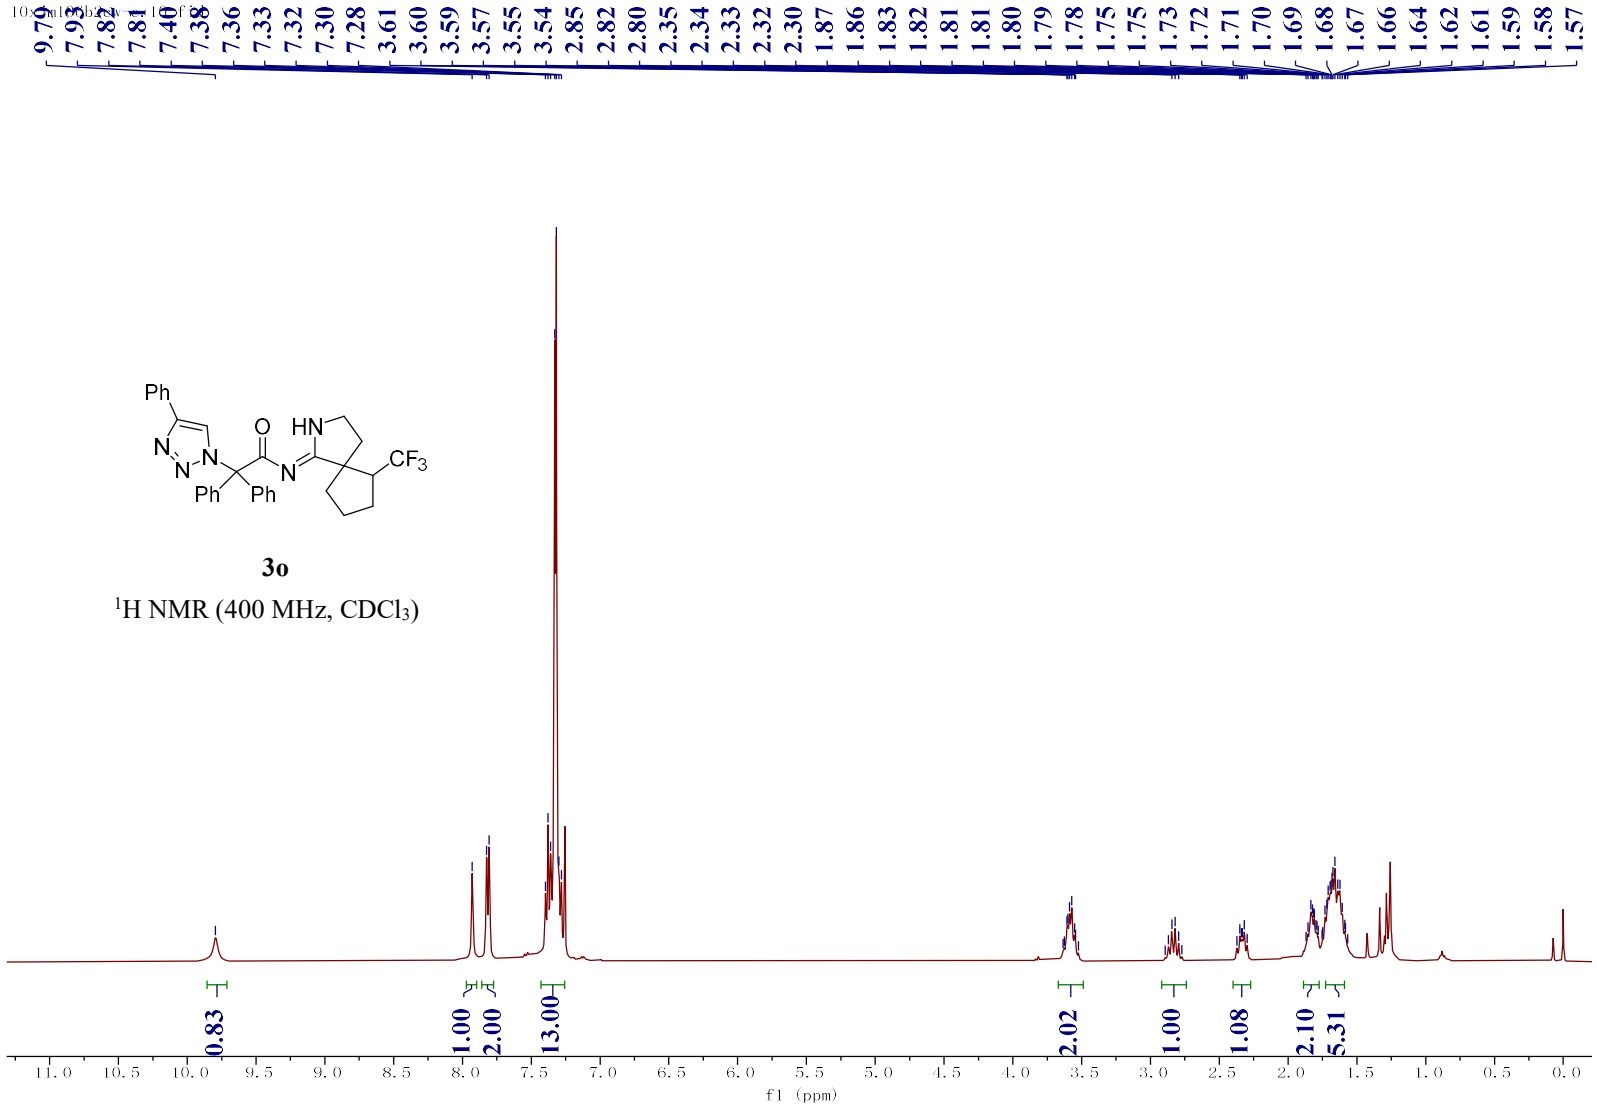

10x\_jm106b2cw-e. 11. fid

— 182.97  
— 178.02

140.27  
131.19  
129.69  
128.80  
128.32  
128.20  
128.01  
127.88  
126.00  
125.75

— 80.53

55.05  
48.72  
48.45  
48.19  
47.93  
44.58  
39.00  
28.88  
25.42  
25.40  
22.65

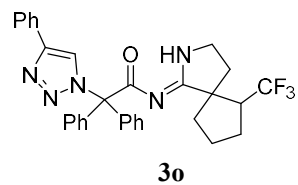

<sup>13</sup>C NMR (100 MHz, CDCl<sub>3</sub>)

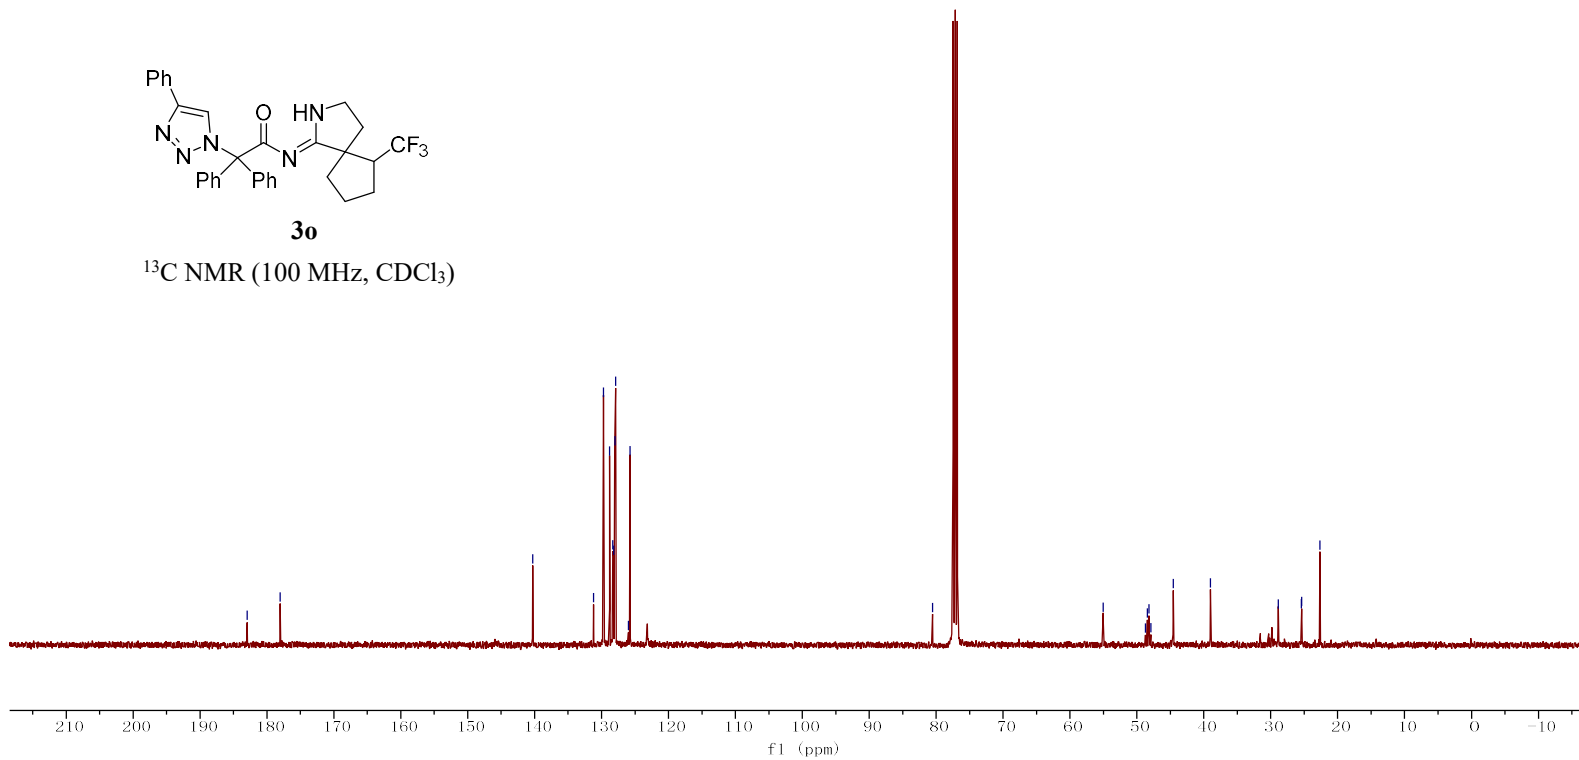

10xjm106b2cw-f. 10. fid

-65.44  
-65.46

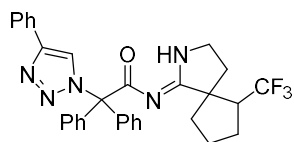

**30**

<sup>19</sup>F NMR (470 MHz, CDCl<sub>3</sub>)

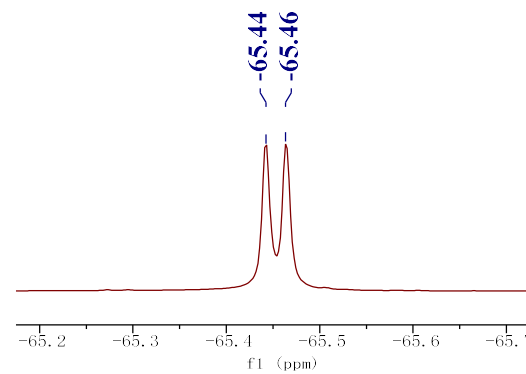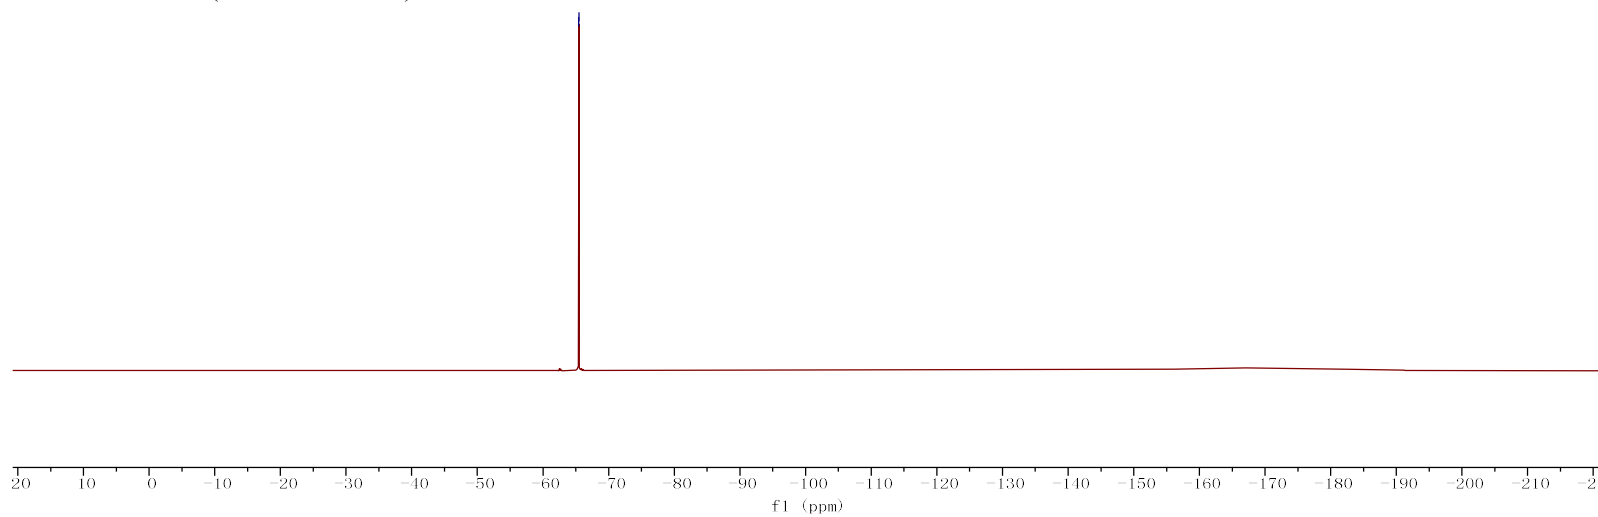

10.03  
 PV  
 CDCl<sub>3</sub>  
 7.41  
 7.39  
 7.38  
 7.36  
 7.35  
 7.34  
 7.34  
 7.33  
 7.32  
 7.31  
 7.30  
 3.65  
 3.64  
 3.63  
 3.62  
 3.61  
 2.69  
 2.68  
 2.31  
 2.30  
 2.29  
 1.96  
 1.95  
 1.94  
 1.92  
 1.84  
 1.82  
 1.74  
 1.73  
 1.72  
 1.71  
 1.68  
 1.67  
 1.65  
 1.65  
 1.52  
 1.50  
 1.49  
 1.43  
 1.42  
 1.40  
 1.40  
 1.37  
 1.36  
 1.34  
 1.32  
 1.32  
 1.31  
 1.29

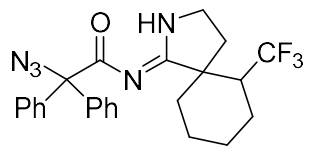

**3p**

<sup>1</sup>H NMR (500 MHz, CDCl<sub>3</sub>)

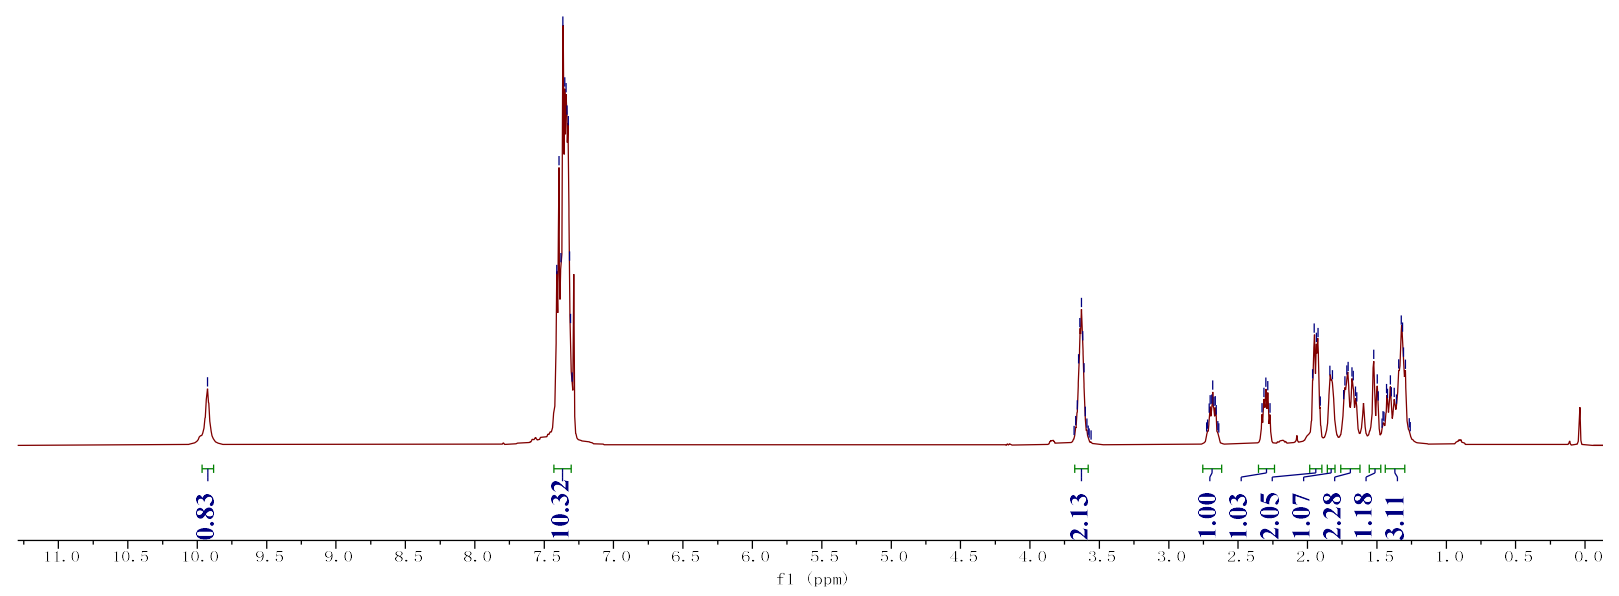



10x jm100cw-e, 23, f1

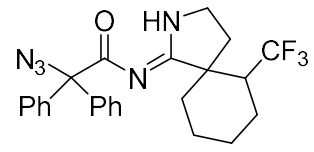

**3p**

<sup>13</sup>C NMR (125 MHz, CDCl<sub>3</sub>)

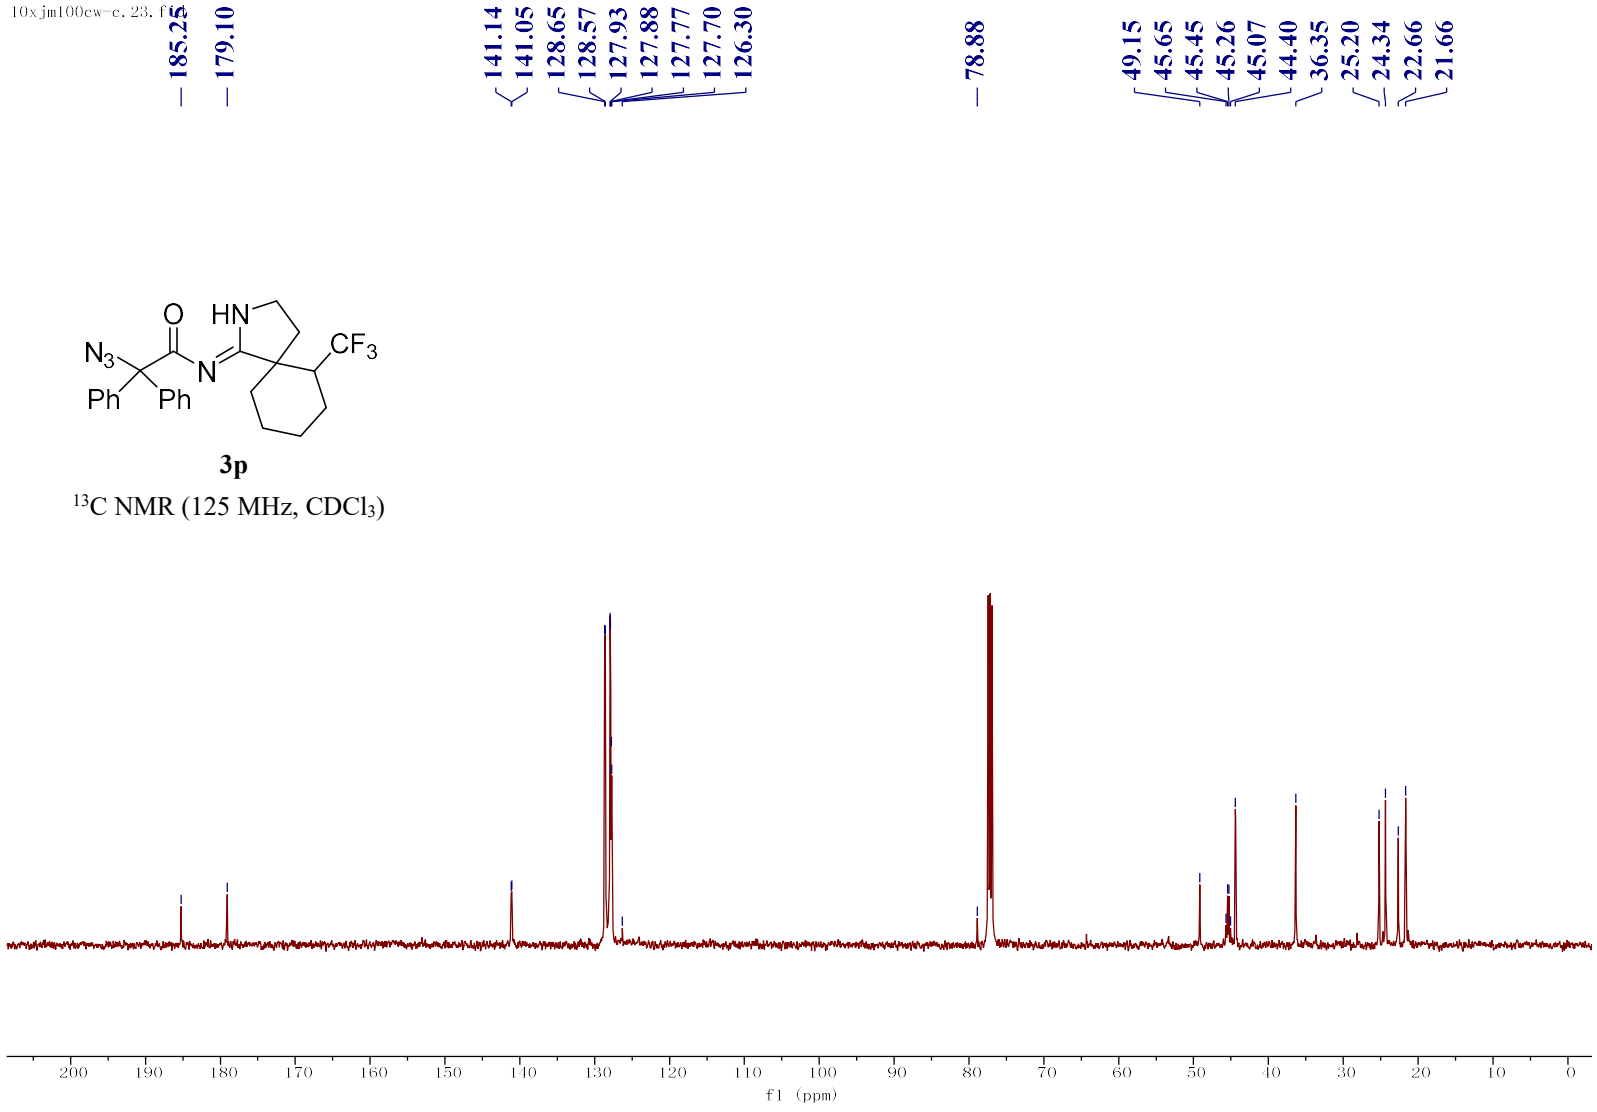

10xjm100cw-ehf. 11. fid

-66.72  
-66.75

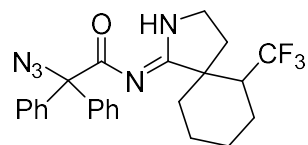

**3p**

<sup>19</sup>F NMR (376 MHz, CDCl<sub>3</sub>)

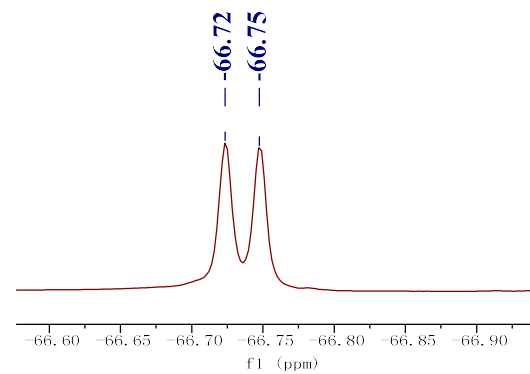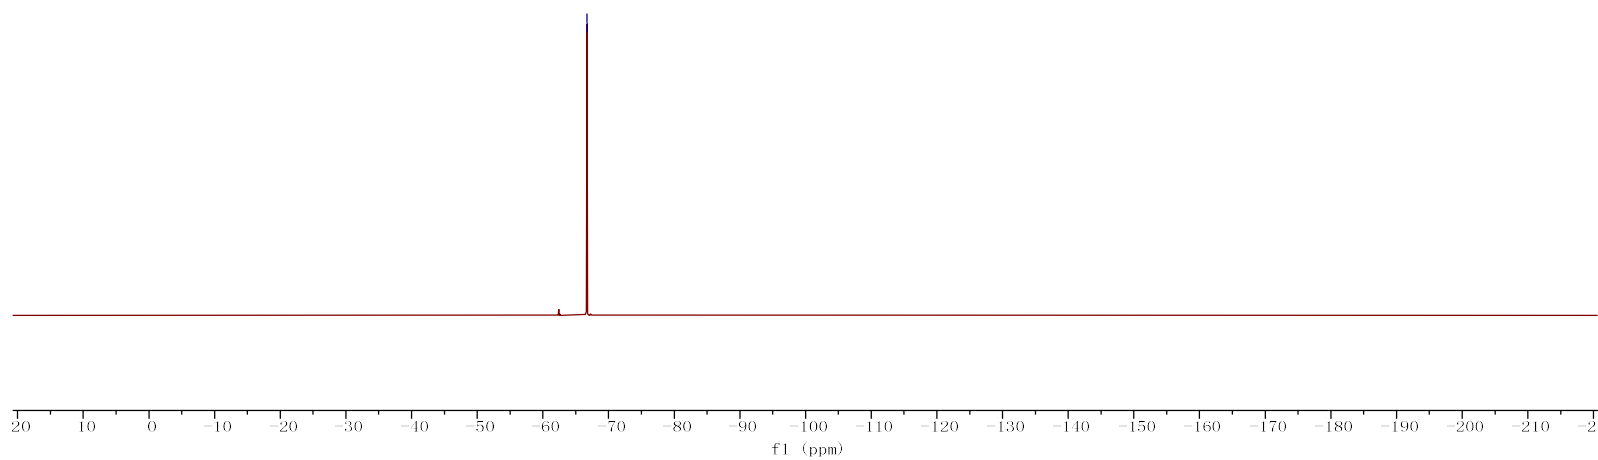

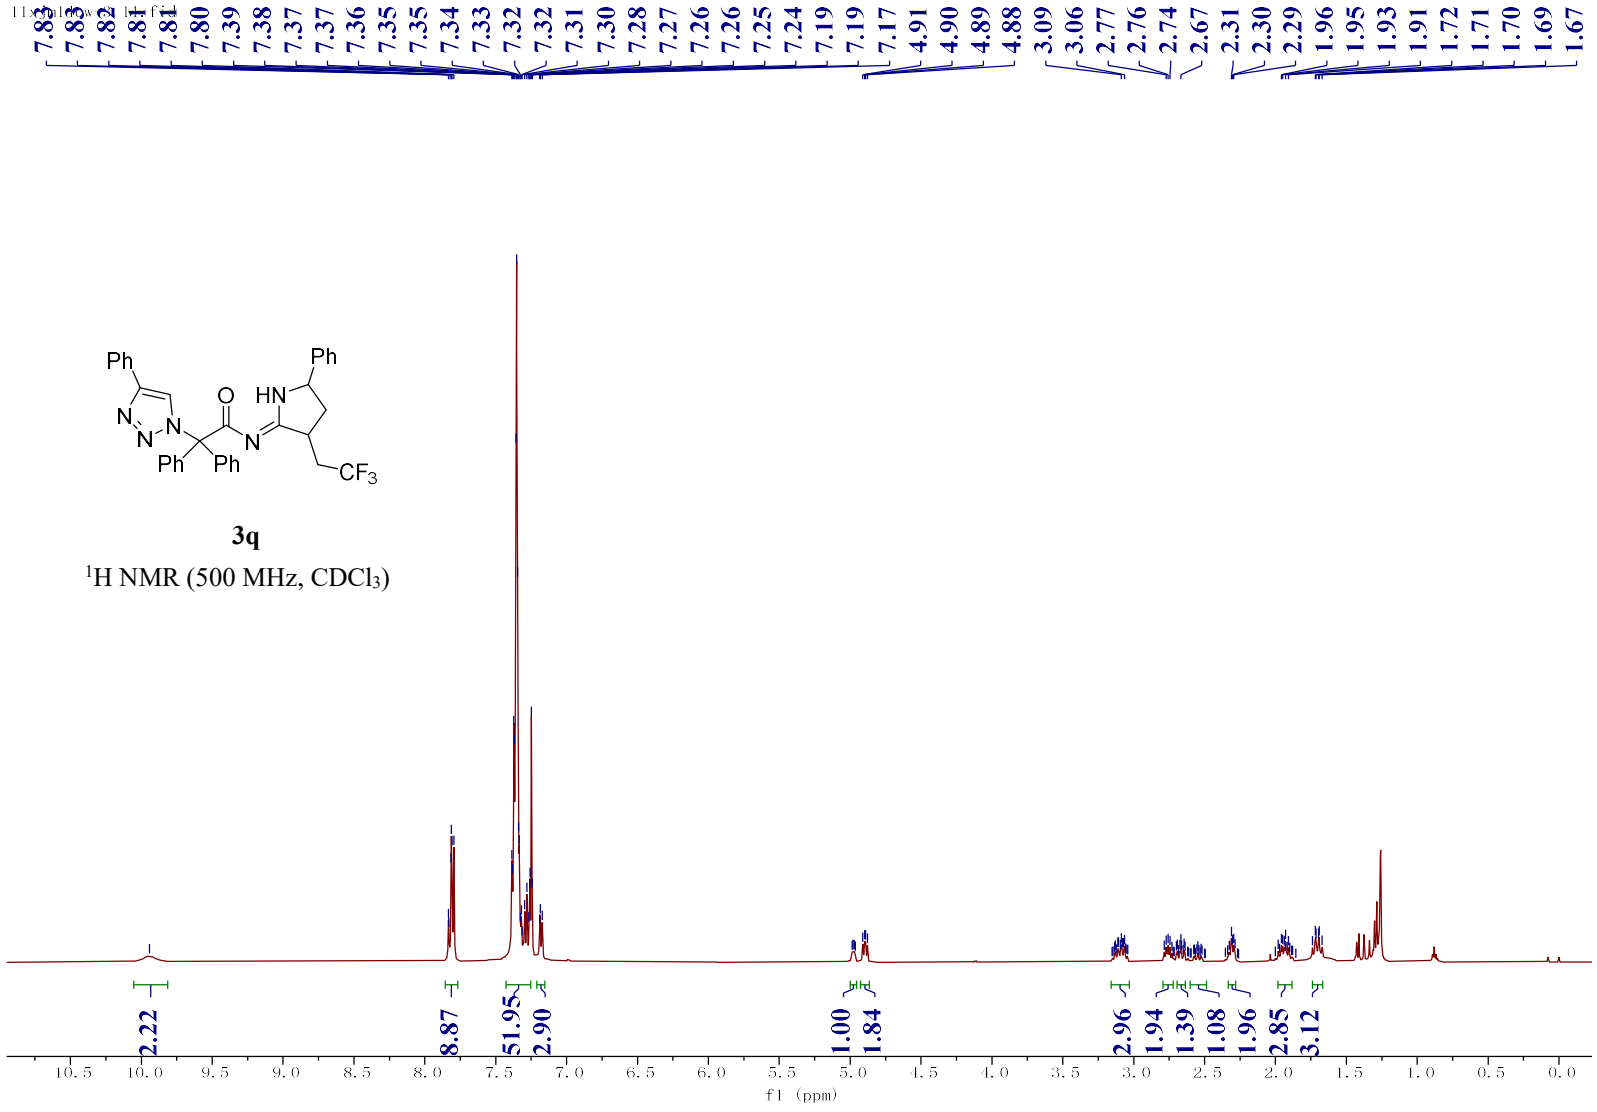

11xjm14ew-3-e.fid

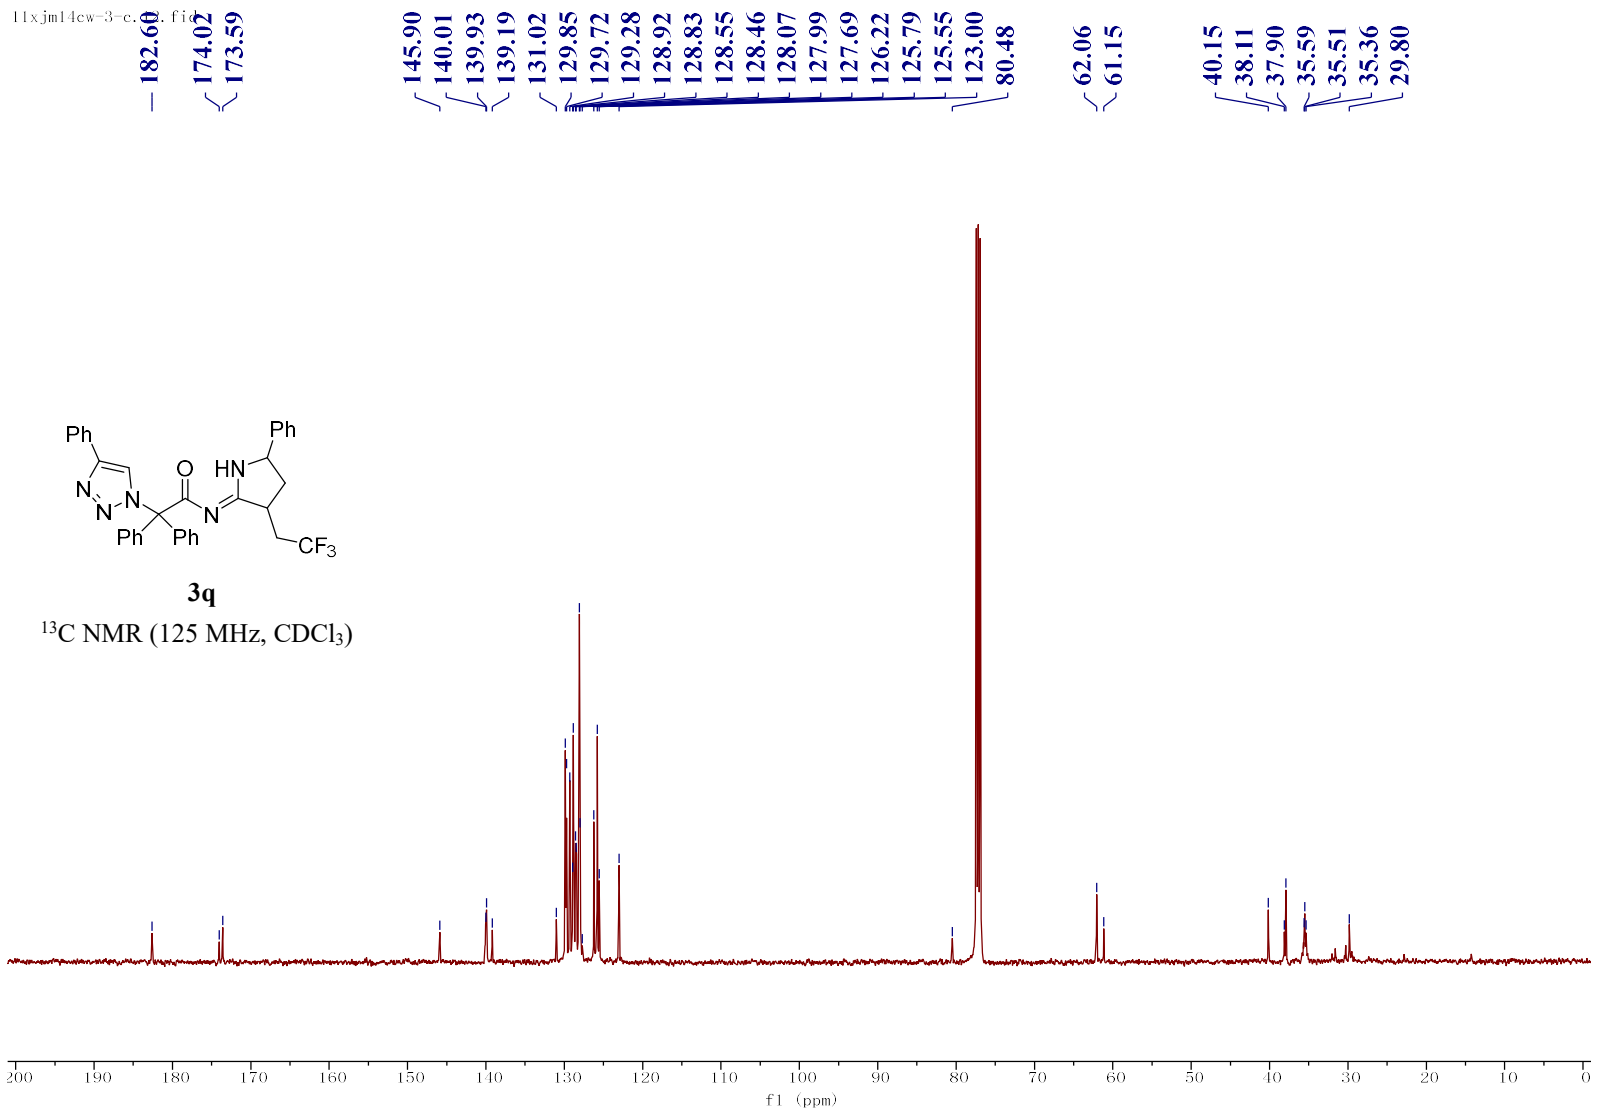

11xjml4ew-3-f, 12. fid

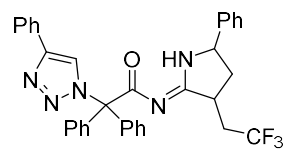

**3q**

$^{19}\text{F}$  NMR (470 MHz,  $\text{CDCl}_3$ )

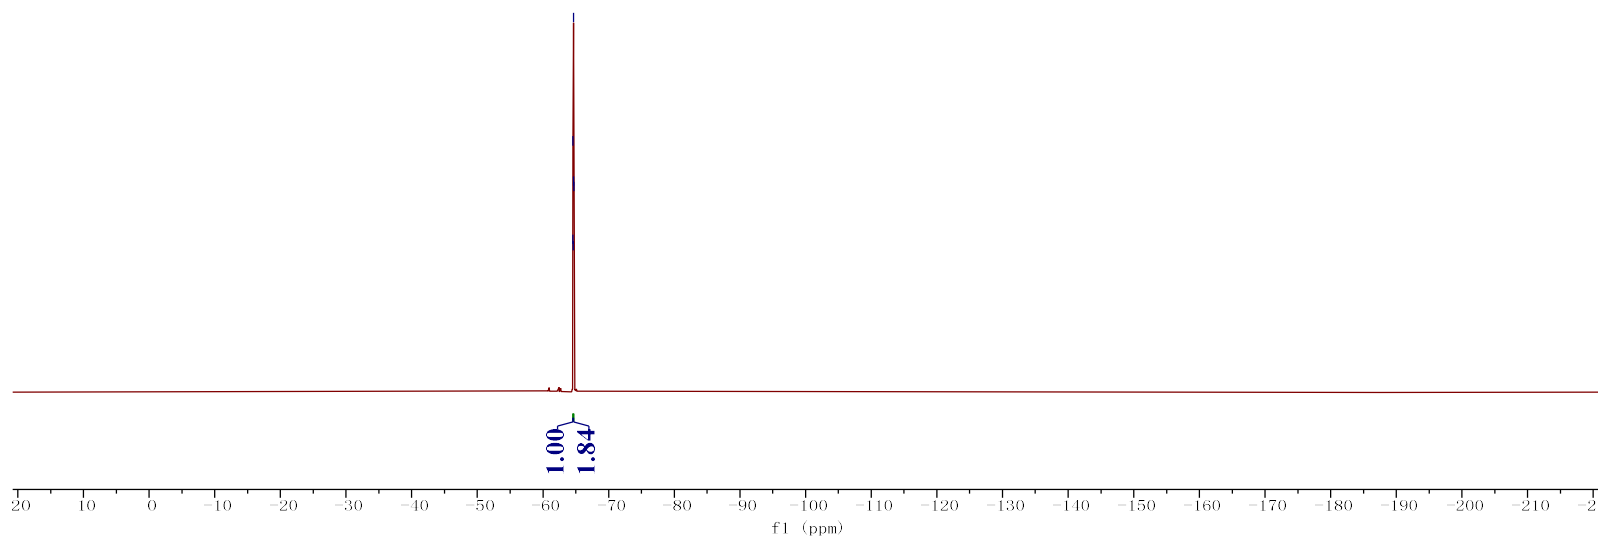

-64.55  
-64.57  
-64.60  
-64.64  
-64.67  
-64.69

-64.55  
-64.57  
-64.60  
-64.64  
-64.67  
-64.69

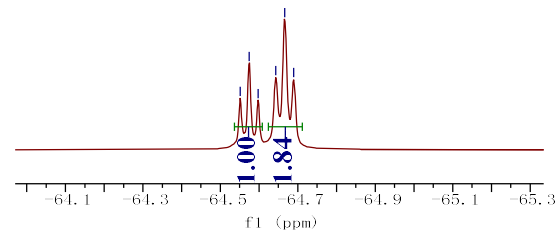

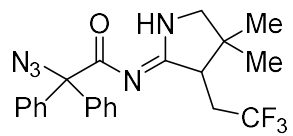

**3r**

<sup>1</sup>H NMR (400 MHz, CDCl<sub>3</sub>)

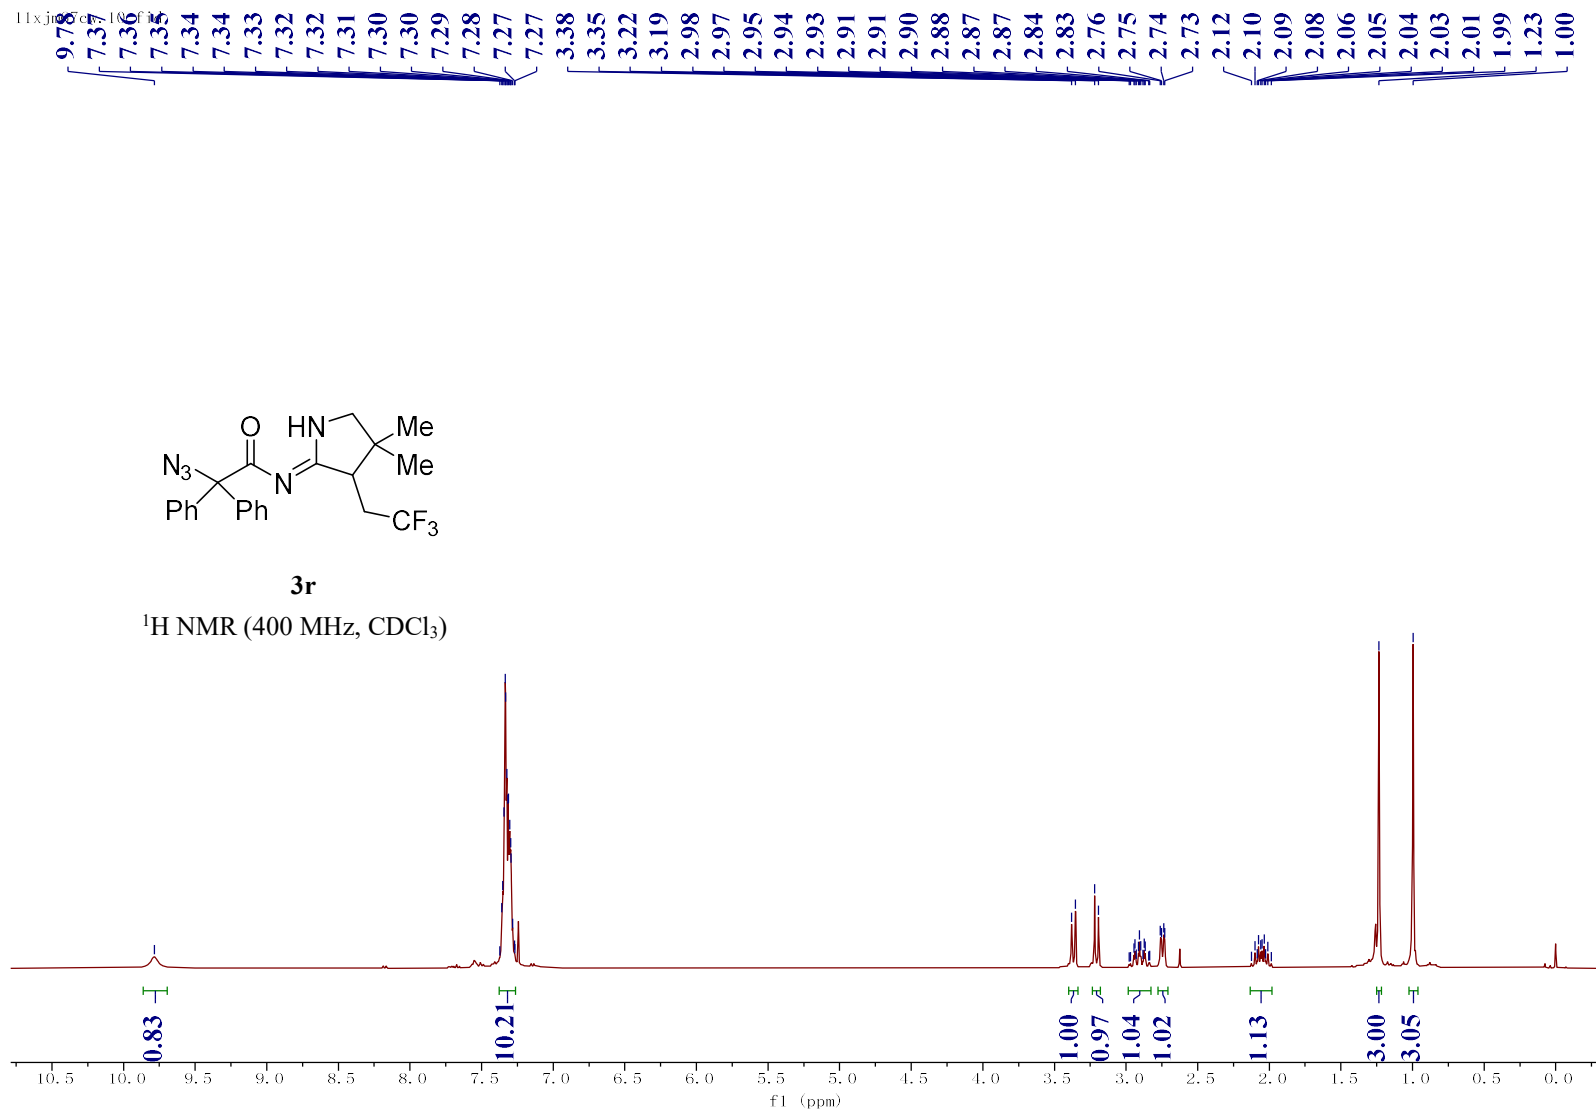

11xjm67ew. 12. fi

— 184.81

— 174.65

140.89  
140.76  
130.96  
128.55  
128.22  
128.07  
127.96  
127.94  
127.88  
125.48  
122.73

— 78.89

— 58.99

49.04  
49.02

39.42  
29.98  
29.68  
29.38  
29.09  
24.98  
24.96  
21.95

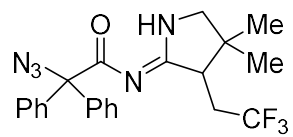

**3r**

<sup>13</sup>C NMR (100 MHz, CDCl<sub>3</sub>)

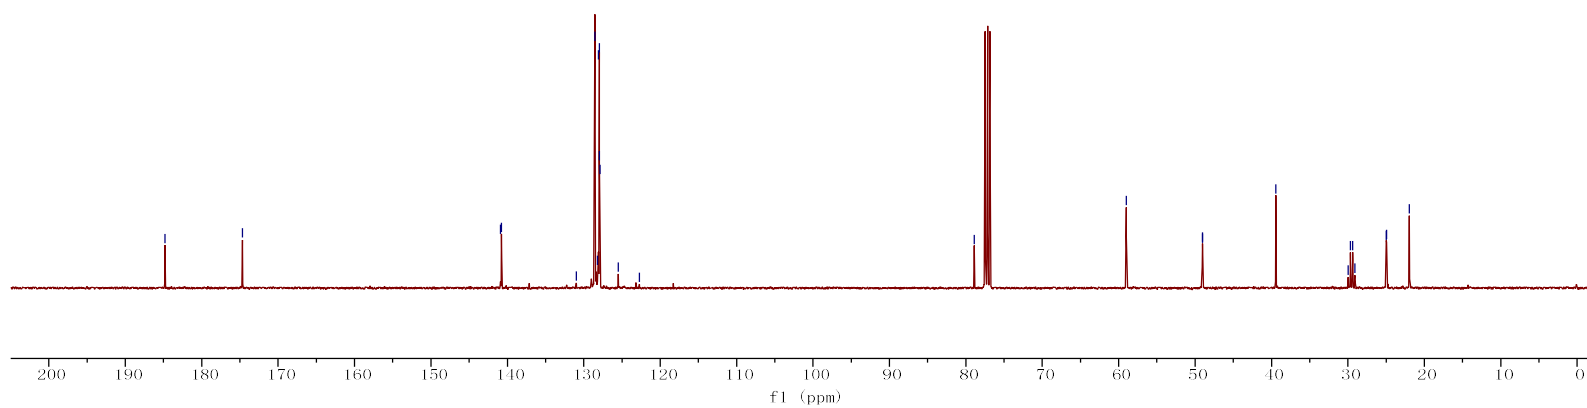

11xjm67ew. 11. fid

-63.69  
-63.72  
-63.75

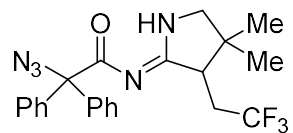

**3r**

<sup>19</sup>F NMR (376 MHz, CDCl<sub>3</sub>)

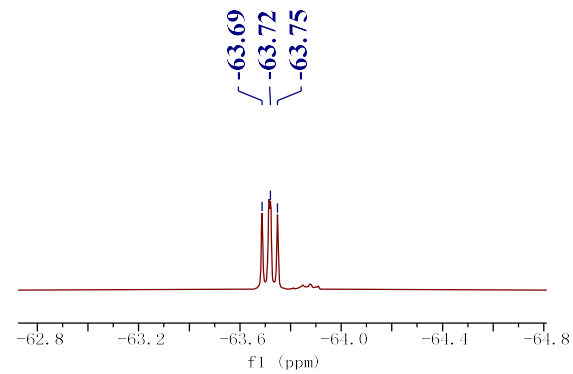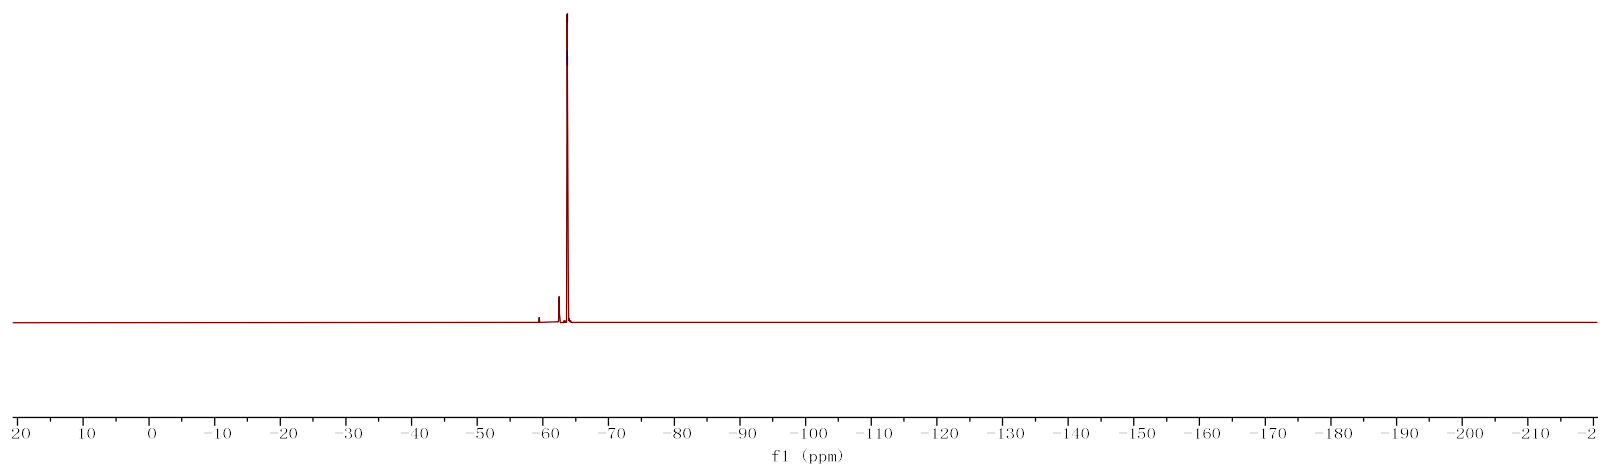



11xjm42ew\_77.fid

7.81  
7.79  
7.77  
7.38  
7.37  
7.35  
7.33  
7.33  
7.32  
7.31  
7.29  
7.28  
3.22  
3.19  
3.15  
3.15  
3.12  
3.12  
2.71  
2.70  
2.69  
2.68  
2.66  
1.91  
1.90  
1.90  
1.88  
1.77  
1.76  
1.69  
1.68  
1.68  
1.67  
1.66  
1.65  
1.64  
1.64  
1.62  
1.61  
1.60  
1.50  
1.49  
1.47  
1.46  
1.45  
1.44  
1.43  
1.42  
1.42  
1.41

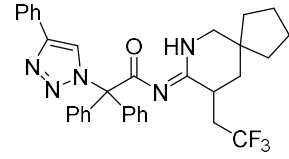

**3s**

<sup>1</sup>H NMR (500 MHz, CDCl<sub>3</sub>)

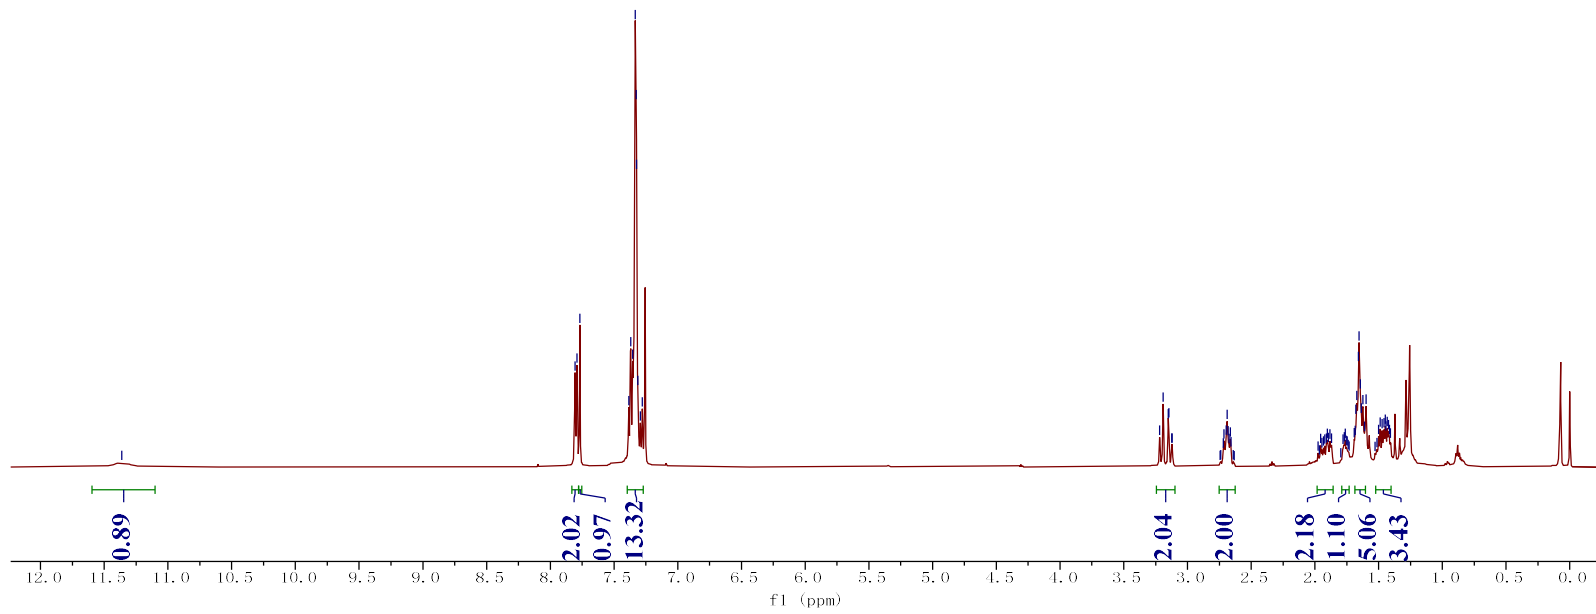

11xjm42ew-c. 47. fi

— 182.08

— 171.18

✓ 145.82

✓ 140.40

✓ 140.32

✓ 131.10

✓ 129.95

✓ 129.71

✓ 128.76

✓ 128.34

✓ 128.00

✓ 127.93

✓ 127.93

✓ 125.82

✓ 122.95

— 80.58

— 51.92

40.35

38.46

37.77

35.97

35.75

34.97

34.02

24.81

24.16

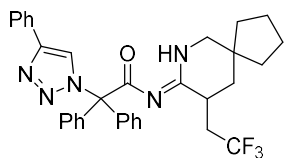

**3s**

<sup>13</sup>C NMR (125 MHz, CDCl<sub>3</sub>)

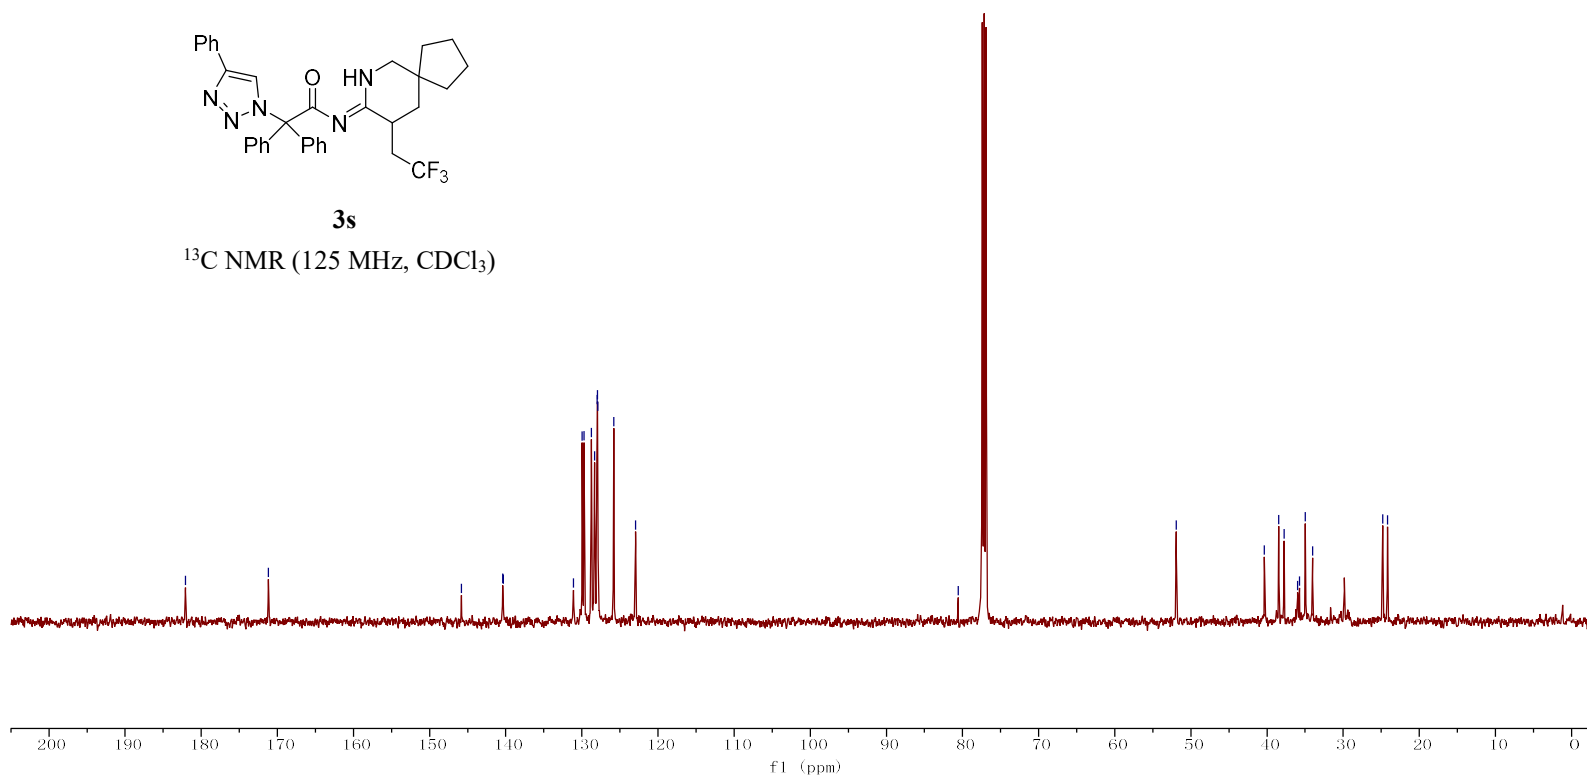

11xjm42ew. 78. fid

-63.22  
-63.25  
-63.27

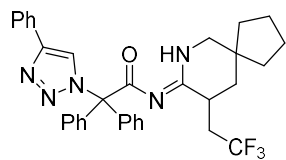

**3s**

<sup>19</sup>F NMR (470 MHz, CDCl<sub>3</sub>)

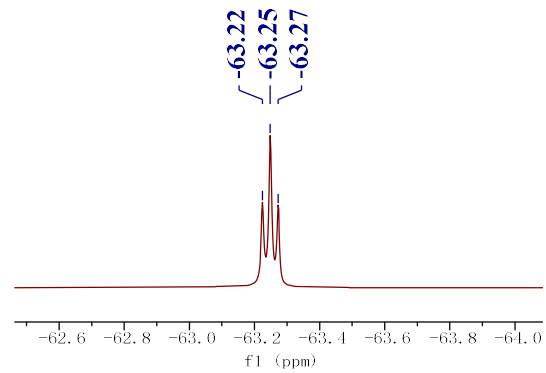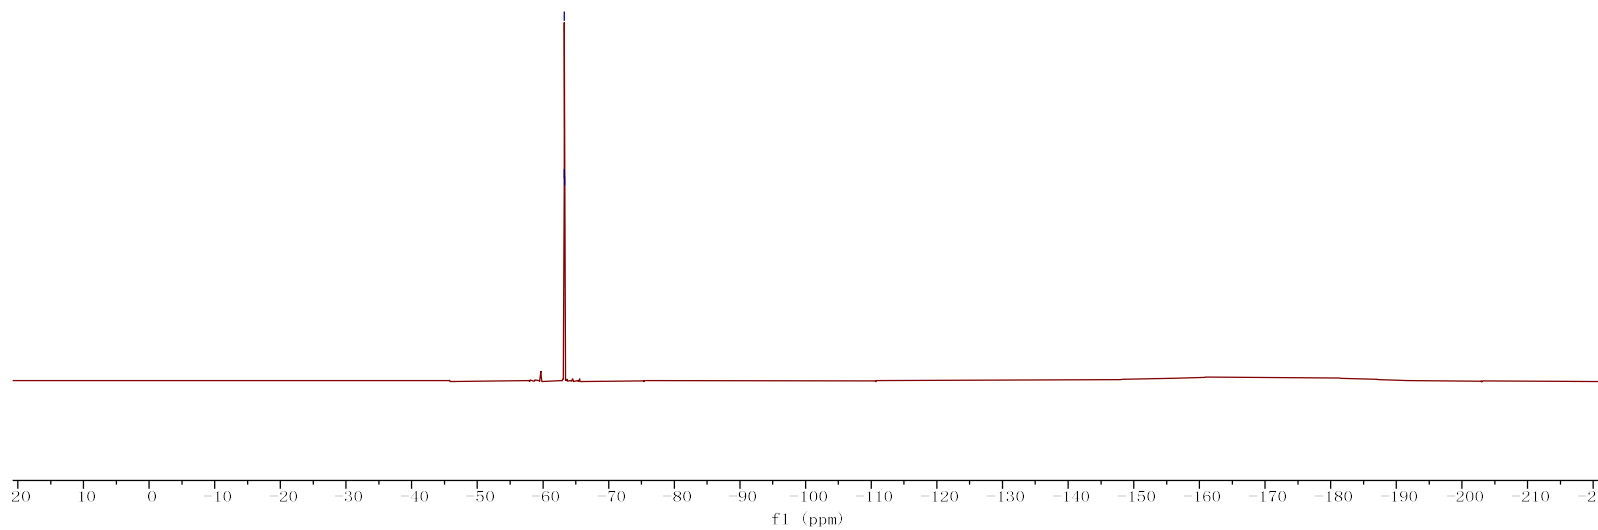

9x  
 7.40  
 7.38  
 7.34  
 7.33  
 7.32  
 7.31  
 7.30  
 7.28  
 7.27  
 7.25  
 5.85  
 3.86  
 3.83  
 3.81  
 3.55  
 3.53  
 3.52  
 3.51  
 3.50  
 3.48  
 3.12  
 3.11  
 3.09  
 3.09  
 3.06  
 3.05  
 3.04  
 3.02  
 3.02  
 2.44  
 2.42  
 2.41  
 2.39  
 2.37  
 2.14  
 2.13  
 2.11  
 2.10  
 2.09  
 2.08  
 2.06  
 2.05  
 2.04  
 1.80  
 1.77  
 1.75  
 1.74  
 1.72  
 1.70  
 1.69

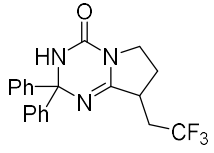

**4a**

<sup>1</sup>H NMR (400 MHz, CDCl<sub>3</sub>)

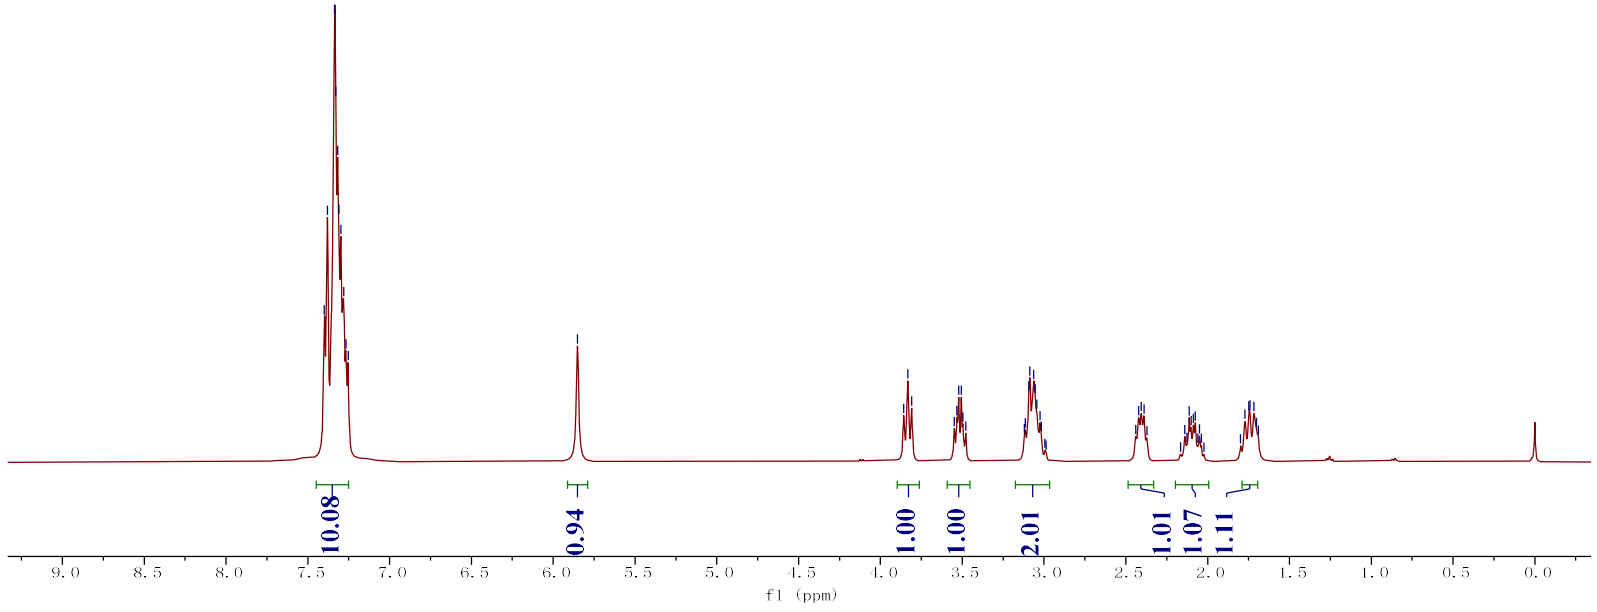

9XJM-C\_12.fid

157.41  
151.11  
145.35  
145.25  
130.89  
128.52  
128.51  
128.42  
128.14  
126.44  
126.14  
125.39  
122.64

79.36

43.32  
36.82  
36.79  
36.76  
36.73  
36.32  
36.03  
35.74  
35.45  
27.34

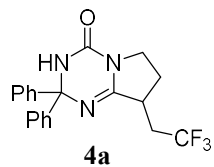

<sup>13</sup>C NMR (100 MHz, CDCl<sub>3</sub>)

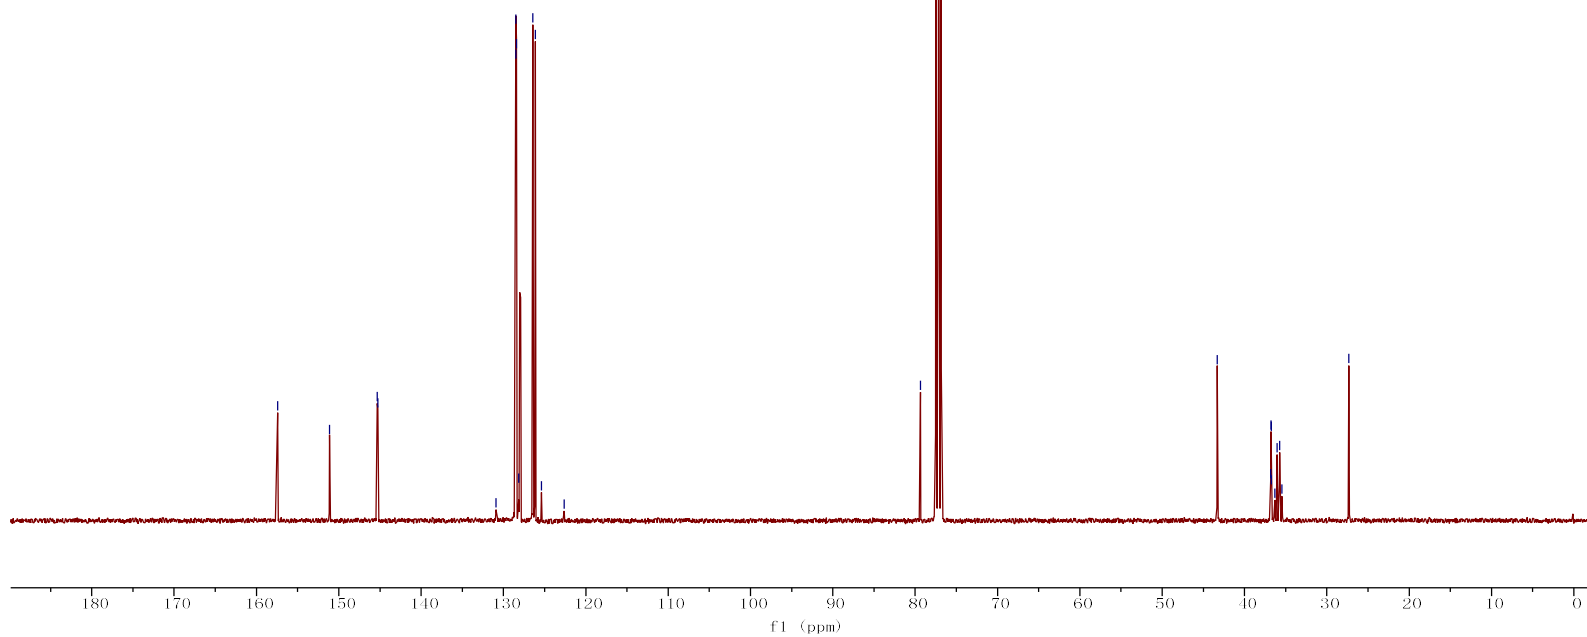

9xjm.11.fid

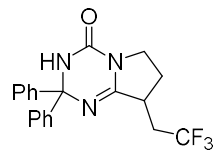

**4a**

$^{19}\text{F}$  NMR (376 MHz,  $\text{CDCl}_3$ )

-64.64  
-64.67  
-64.70

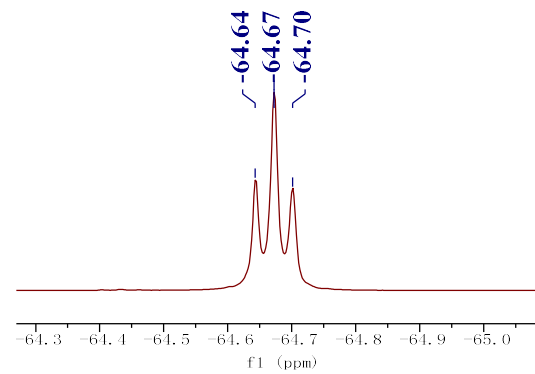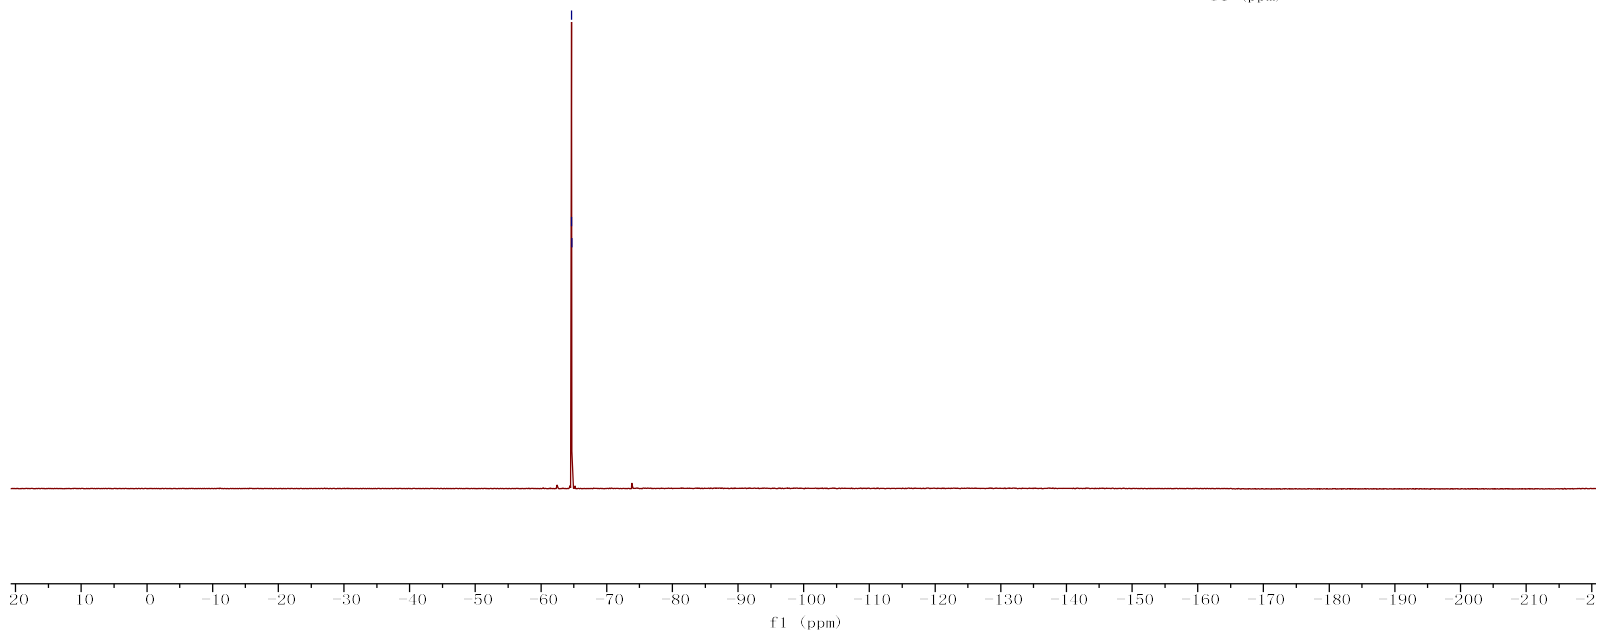

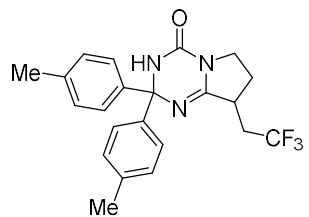

**4b**

<sup>1</sup>H NMR (400 MHz, CDCl<sub>3</sub>)

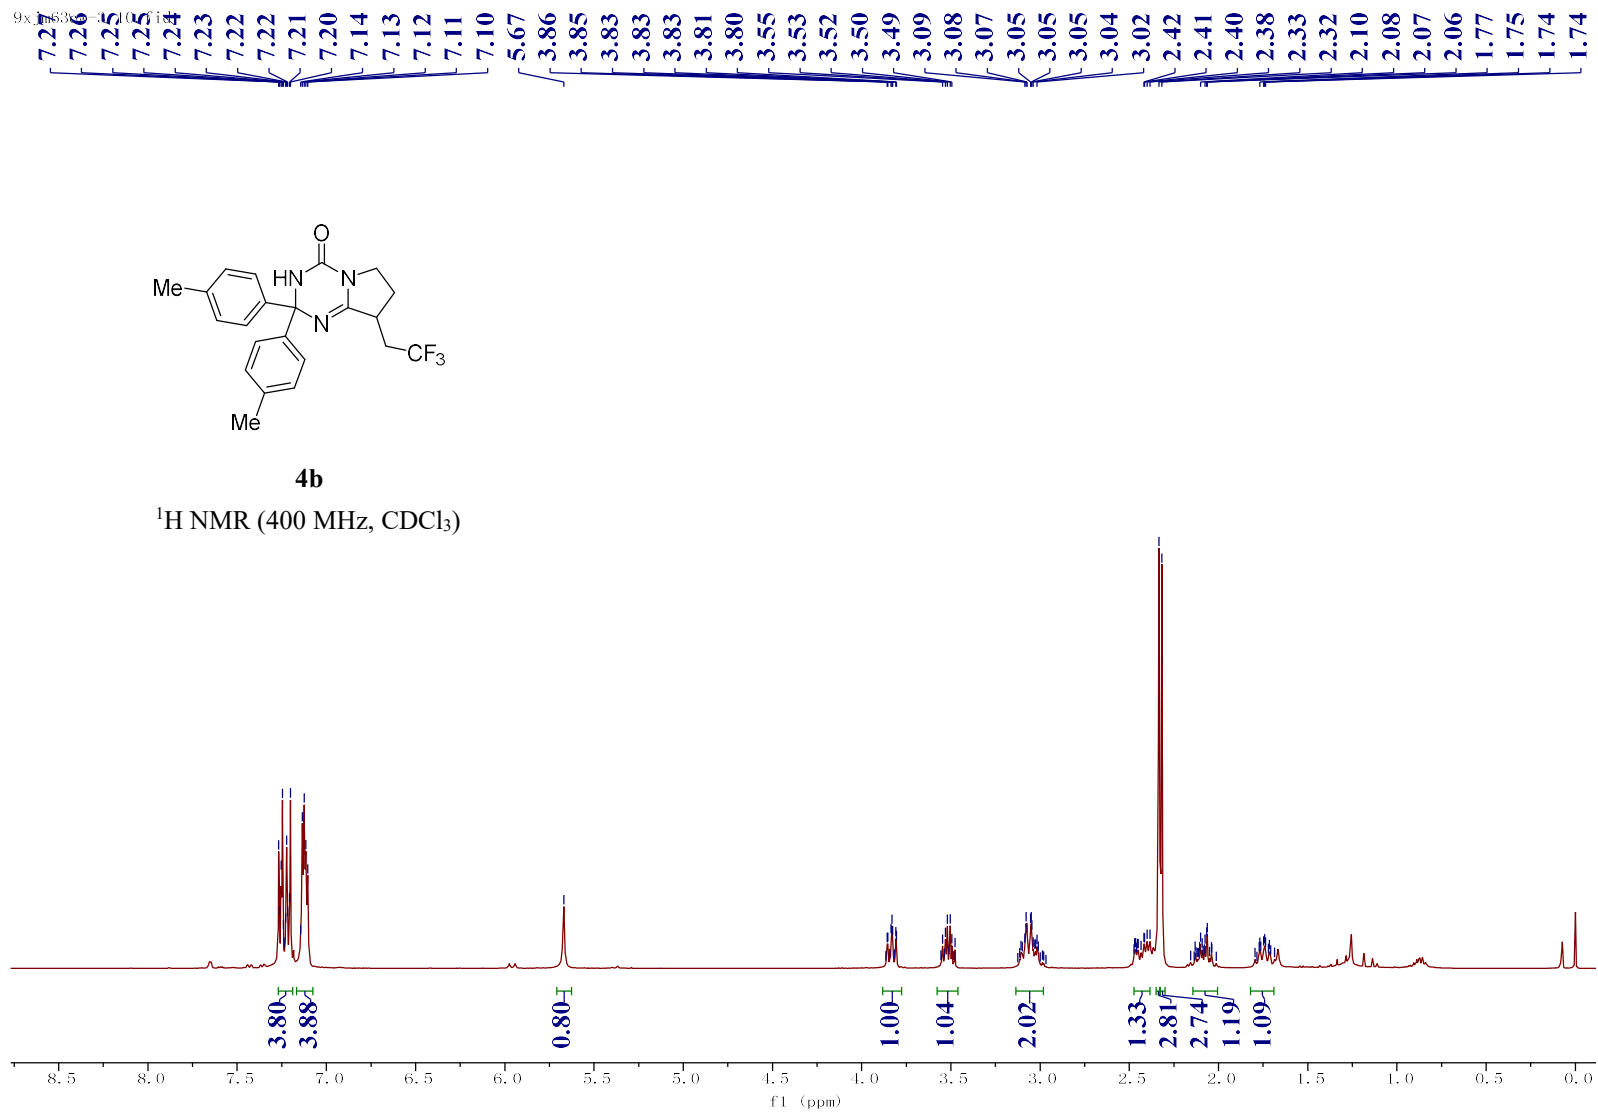

9xjm63cw-3\_12.fid

— 157.14  
— 151.14  
— 142.71  
— 142.52  
— 137.77  
— 137.60  
— 129.16  
— 129.16  
— 129.07  
— 128.17  
— 126.34  
— 126.03  
— 125.42

— 79.17

— 43.30  
— 36.78  
— 36.76  
— 36.72  
— 36.70  
— 36.35  
— 36.06  
— 35.77  
— 35.48  
— 27.36  
— 21.19  
— 21.16

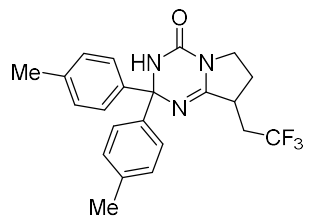

**4b**

<sup>13</sup>C NMR (100 MHz, CDCl<sub>3</sub>)

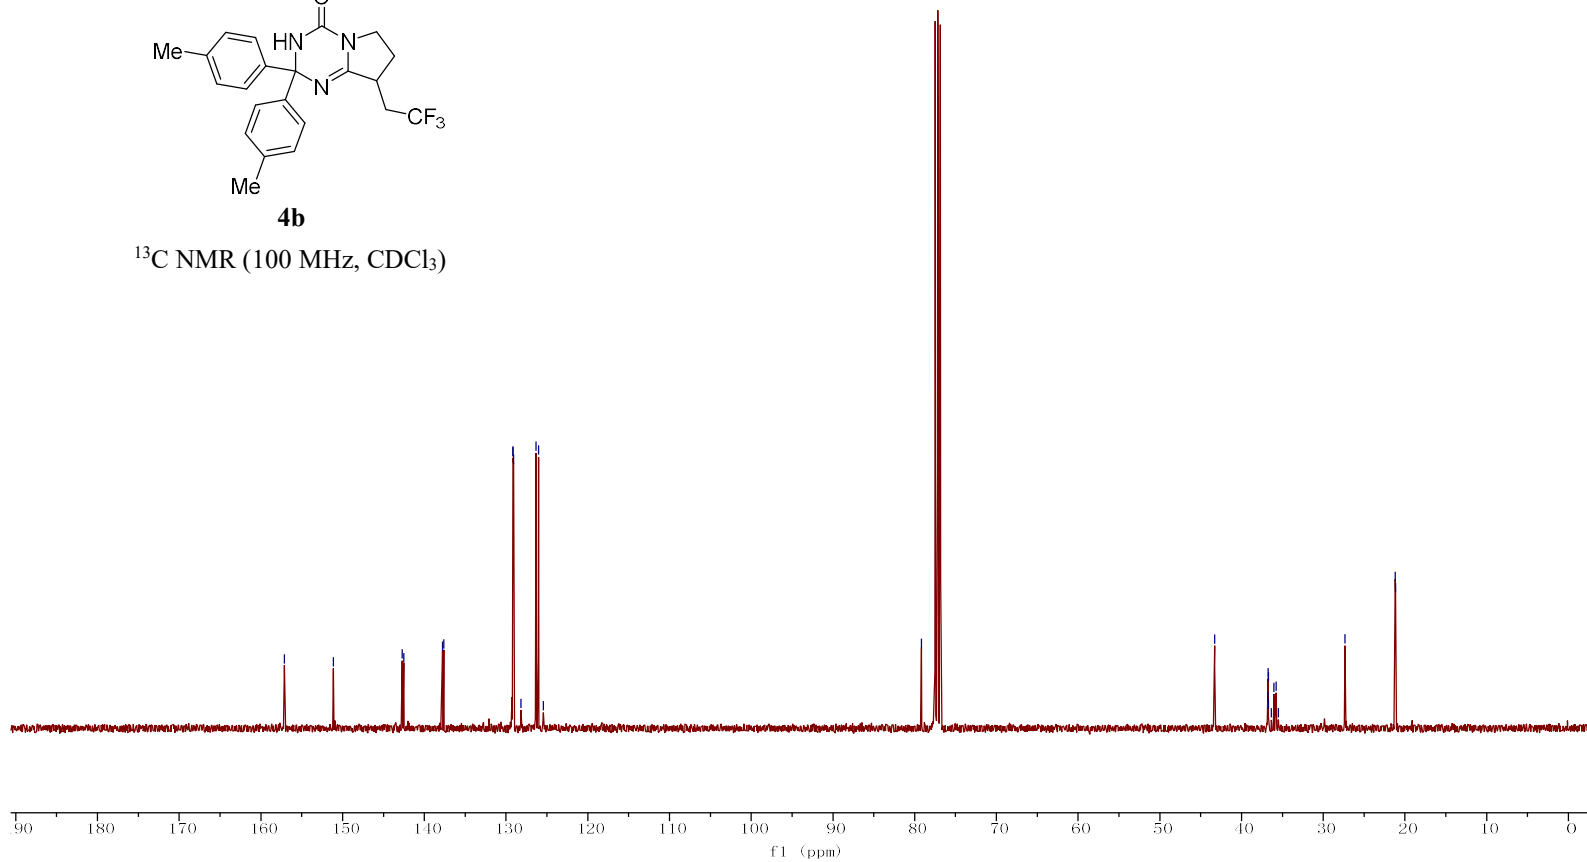



9xjm63cw-3\_11.fid

-64.66  
-64.69  
-64.71

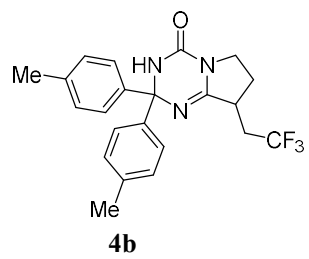

$^{19}\text{F}$  NMR (376 MHz,  $\text{CDCl}_3$ )

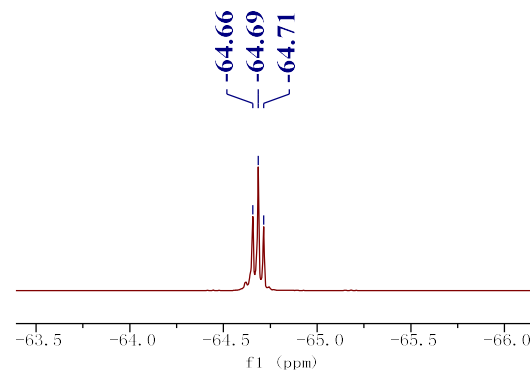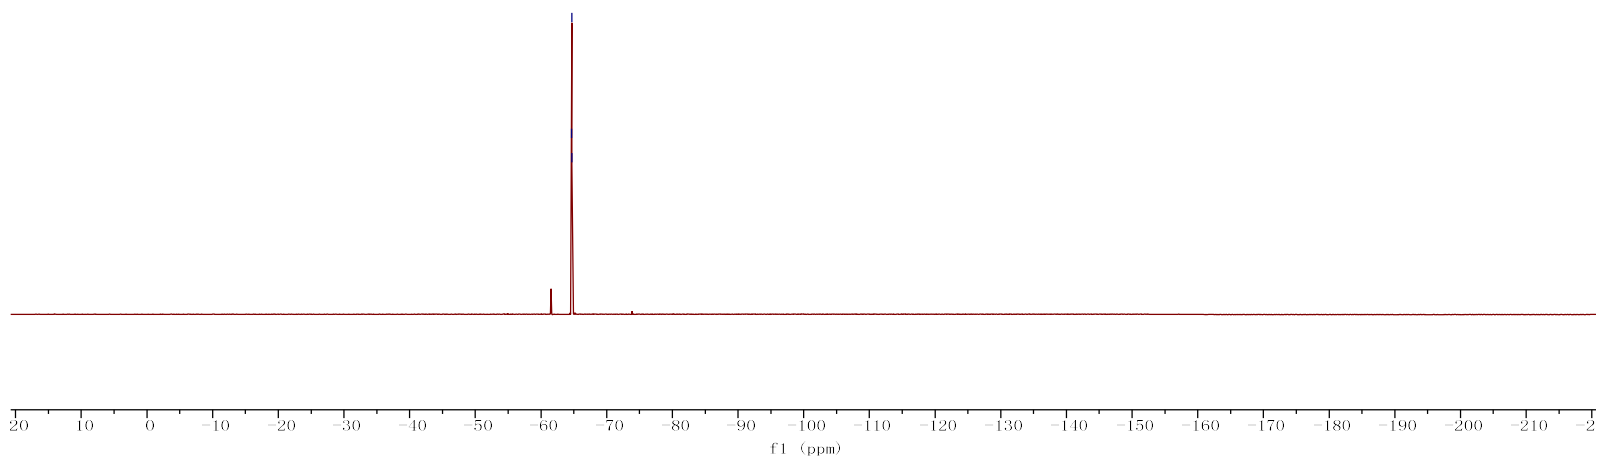

9X16577  
 7.47  
 7.47  
 7.45  
 7.41  
 7.26  
 7.25  
 7.23  
 7.22  
 7.20  
 5.86  
 3.87  
 3.84  
 3.82  
 3.56  
 3.54  
 3.53  
 3.52  
 3.51  
 3.49  
 3.12  
 3.12  
 3.10  
 3.09  
 3.09  
 3.07  
 3.07  
 3.06  
 3.04  
 3.03  
 3.01  
 3.00  
 2.99  
 2.98  
 2.97  
 2.96  
 2.47  
 2.45  
 2.43  
 2.42  
 2.40  
 2.13  
 2.10  
 2.09  
 2.08  
 2.07  
 2.04  
 1.82  
 1.79  
 1.76  
 1.74

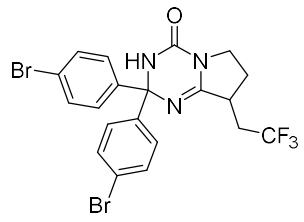

**4c**

<sup>1</sup>H NMR (400 MHz, CDCl<sub>3</sub>)

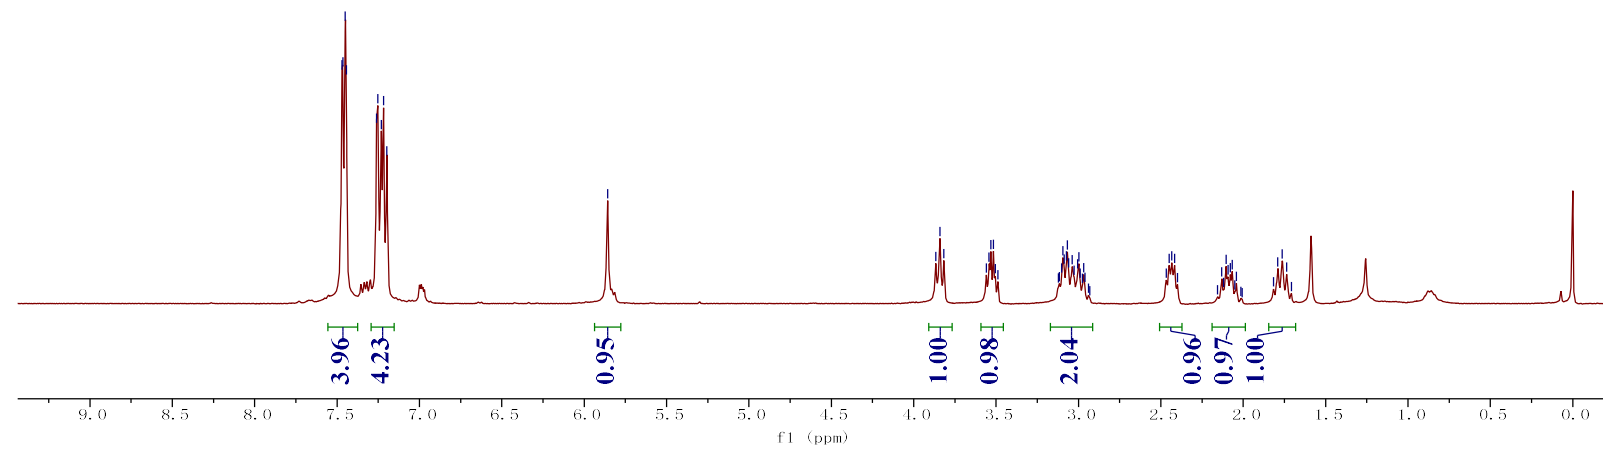

9xjm57bew-e1024\_16.fid

157.91  
151.26  
144.06  
143.98  
131.66  
131.63  
130.77  
128.22  
128.02  
127.86  
125.27  
122.52  
122.36  
122.22

78.65

43.40  
36.88  
36.85  
36.82  
36.79  
36.22  
35.93  
35.64  
35.35  
27.26

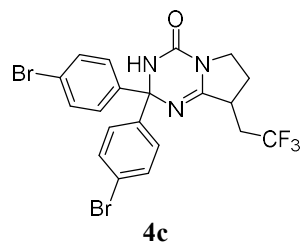

$^{13}\text{C}$  NMR (100 MHz,  $\text{CDCl}_3$ )

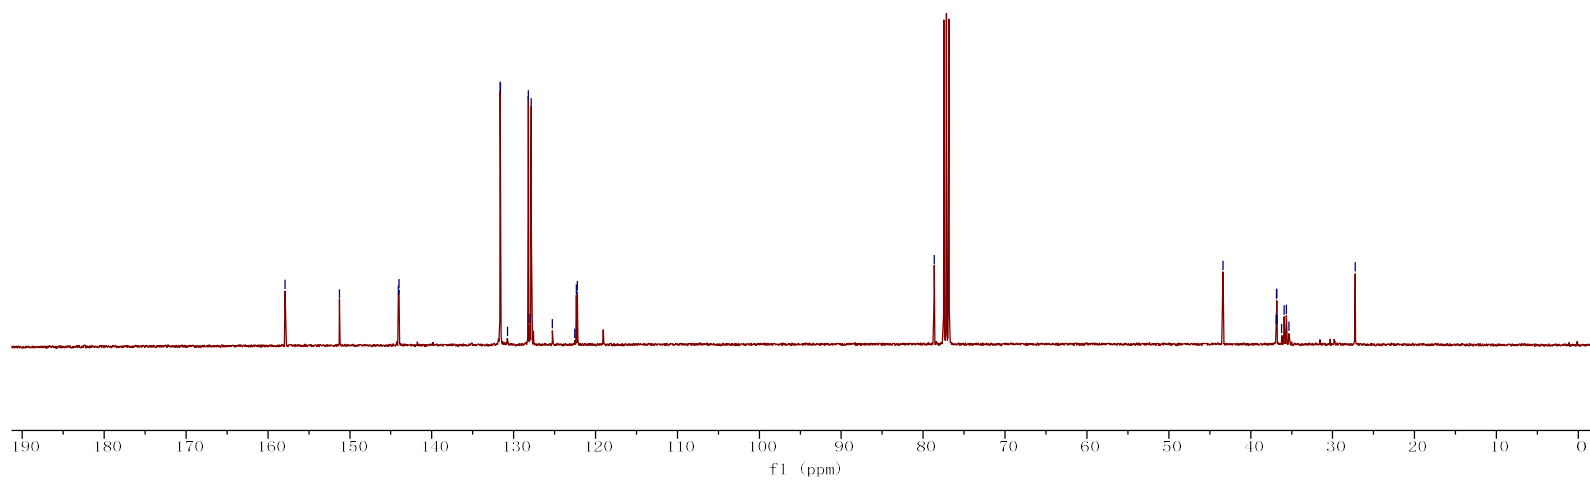

9XJM57CW-3\_11.fid

-64.64  
-64.67  
-64.70

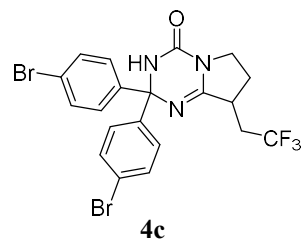

$^{19}\text{F}$  NMR (376 MHz,  $\text{CDCl}_3$ )

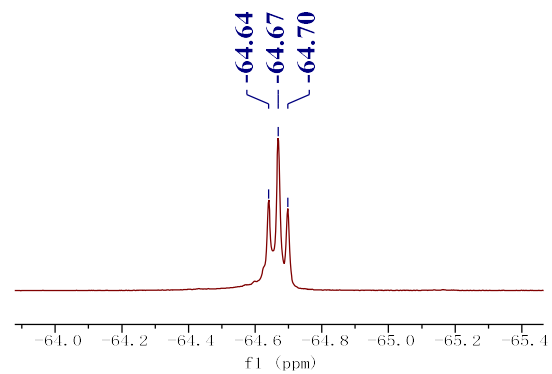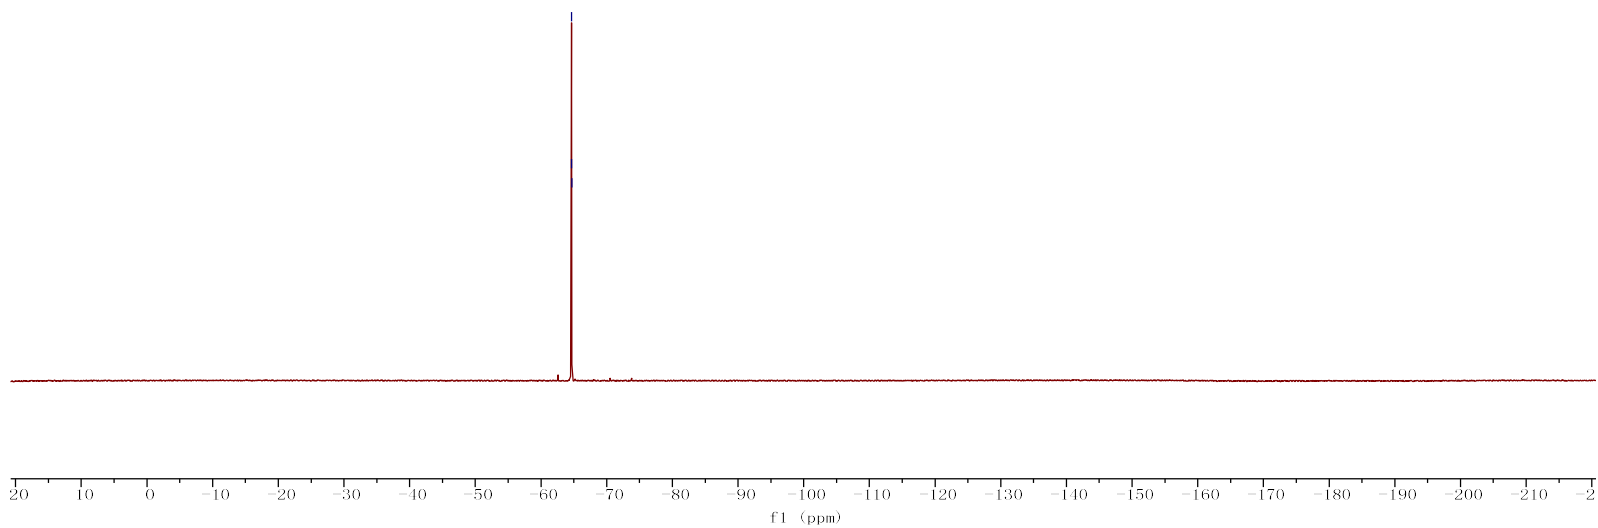

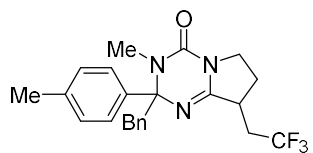

**4d**

<sup>1</sup>H NMR (500 MHz, CDCl<sub>3</sub>)

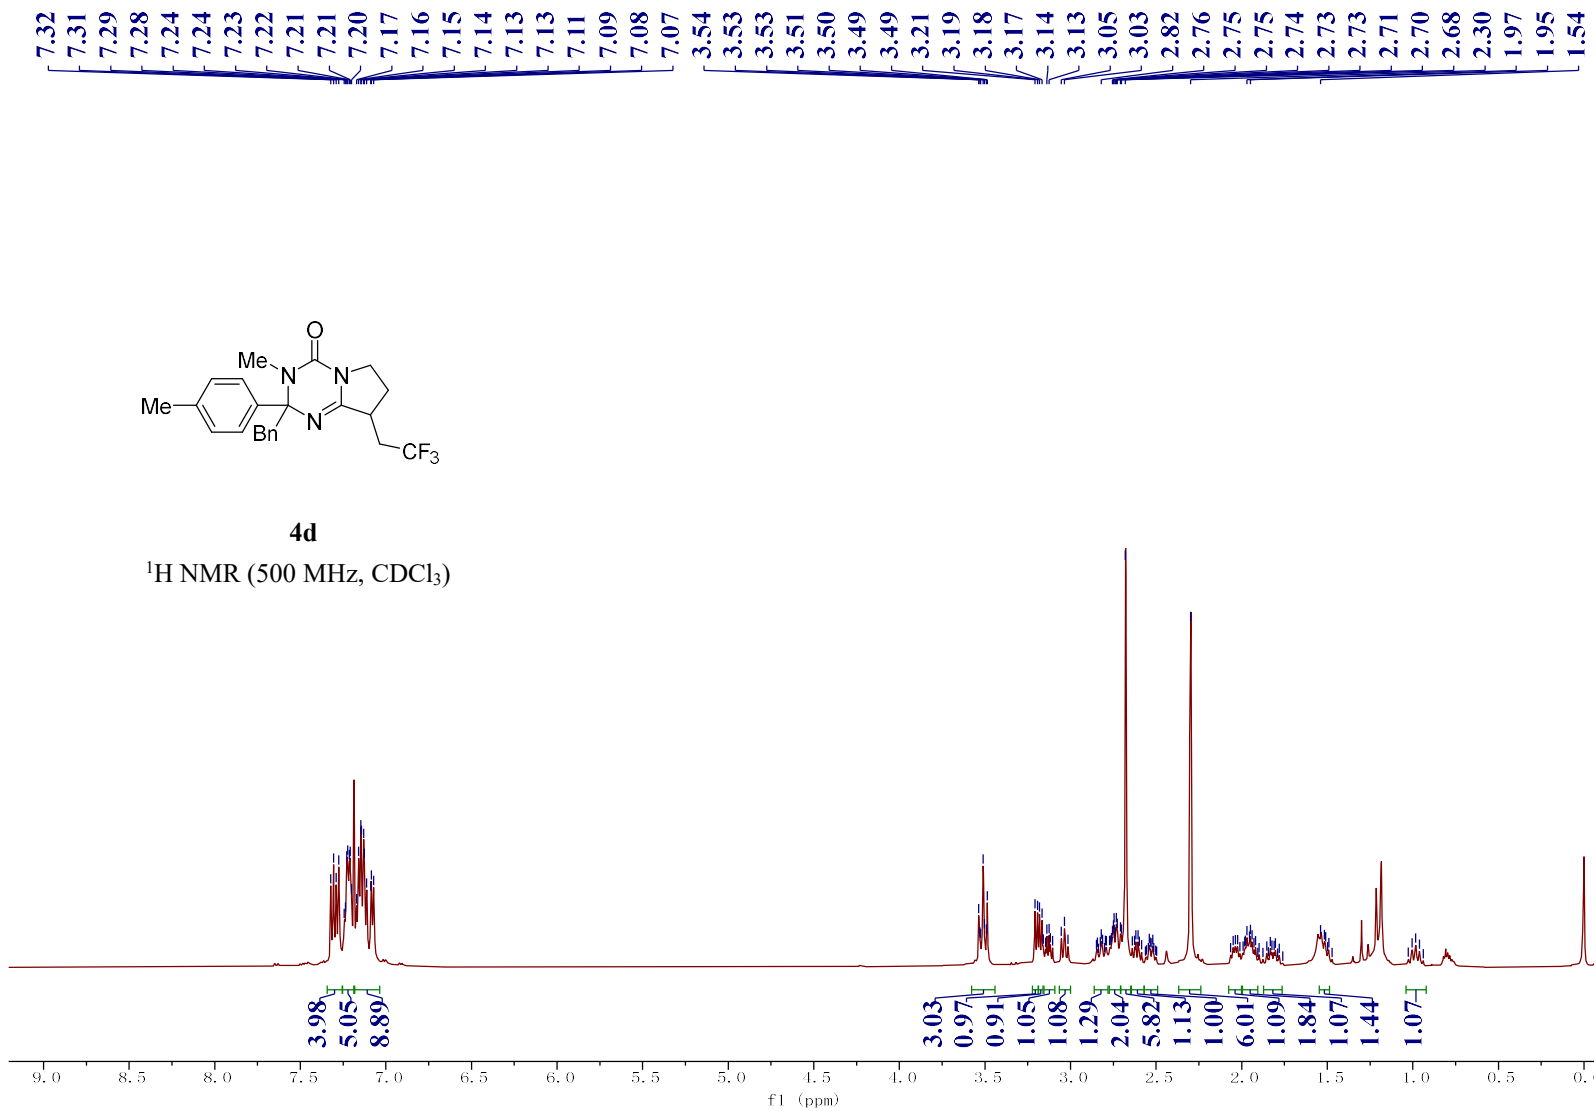

11xjm16bew-e, 11, fid

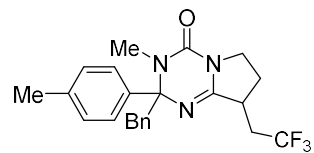

**4d**

<sup>13</sup>C NMR (100 MHz, CDCl<sub>3</sub>)

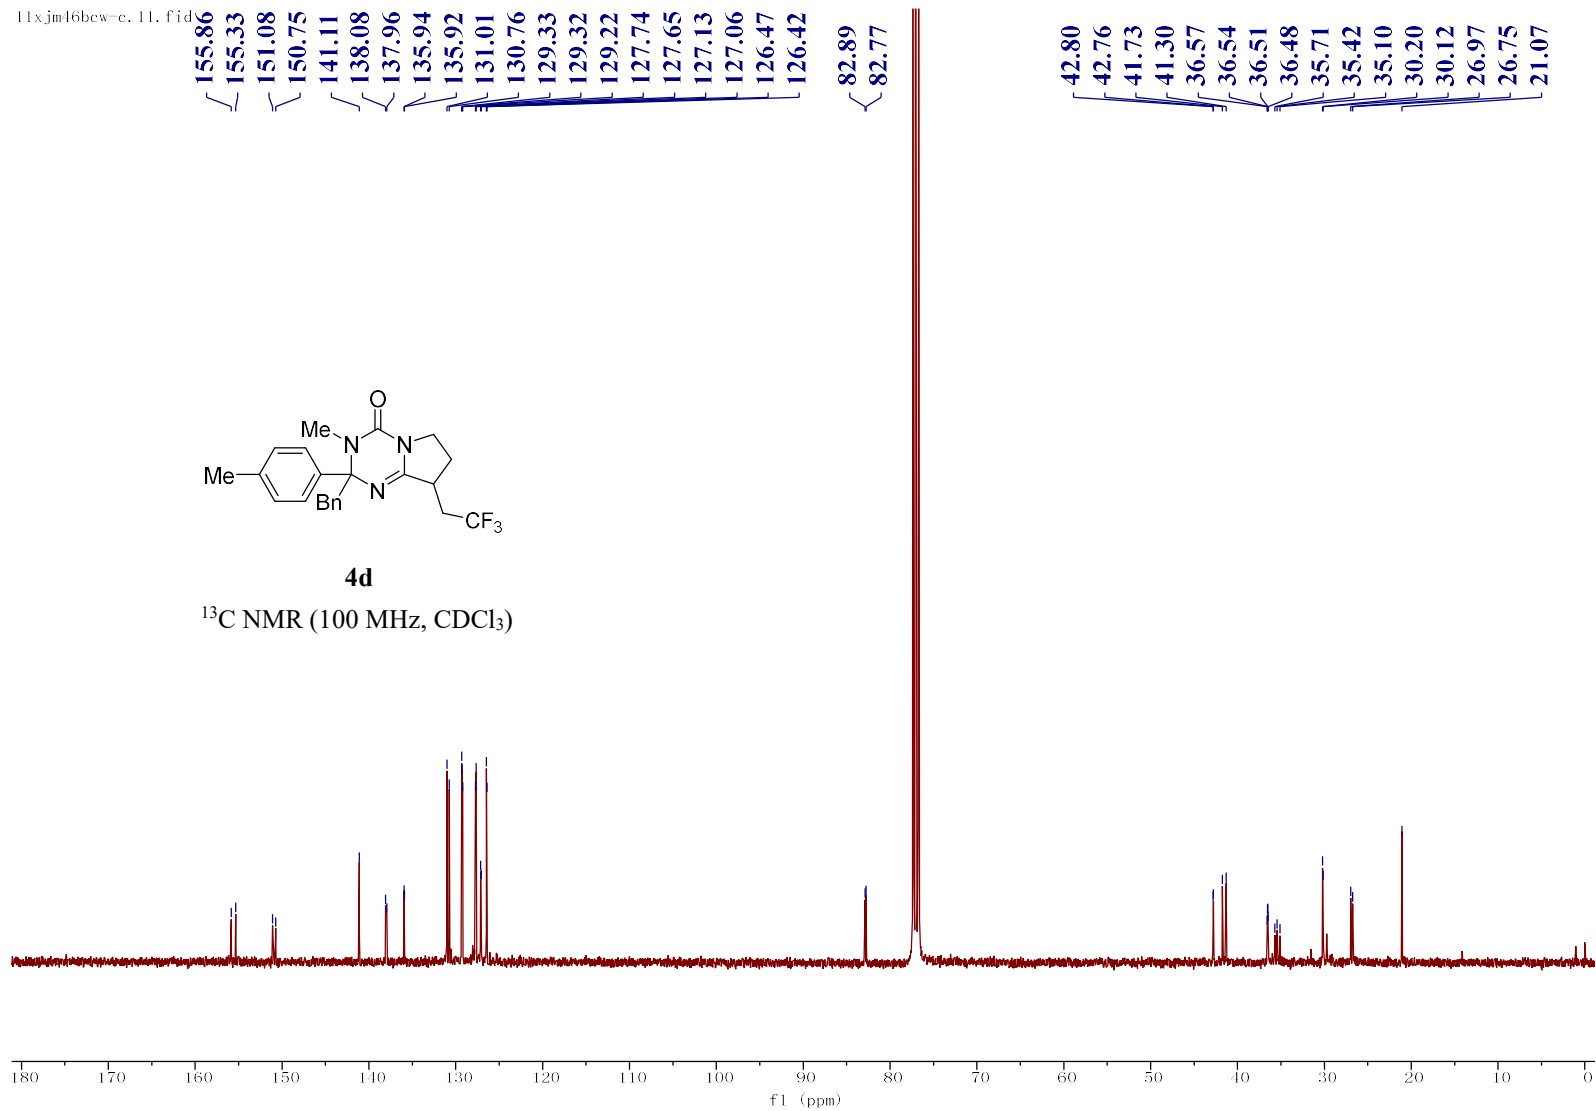

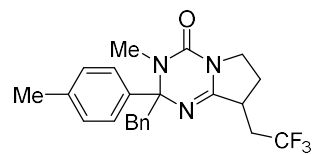

**4d**

$^{19}\text{F}$  NMR (470 MHz,  $\text{CDCl}_3$ )

-64.78  
-64.81  
-64.83  
-64.89  
-64.92  
-64.94

-64.78  
-64.81  
-64.83  
-64.89  
-64.92  
-64.94

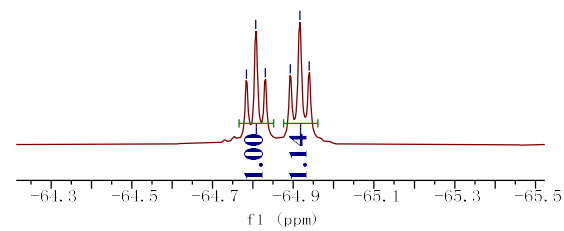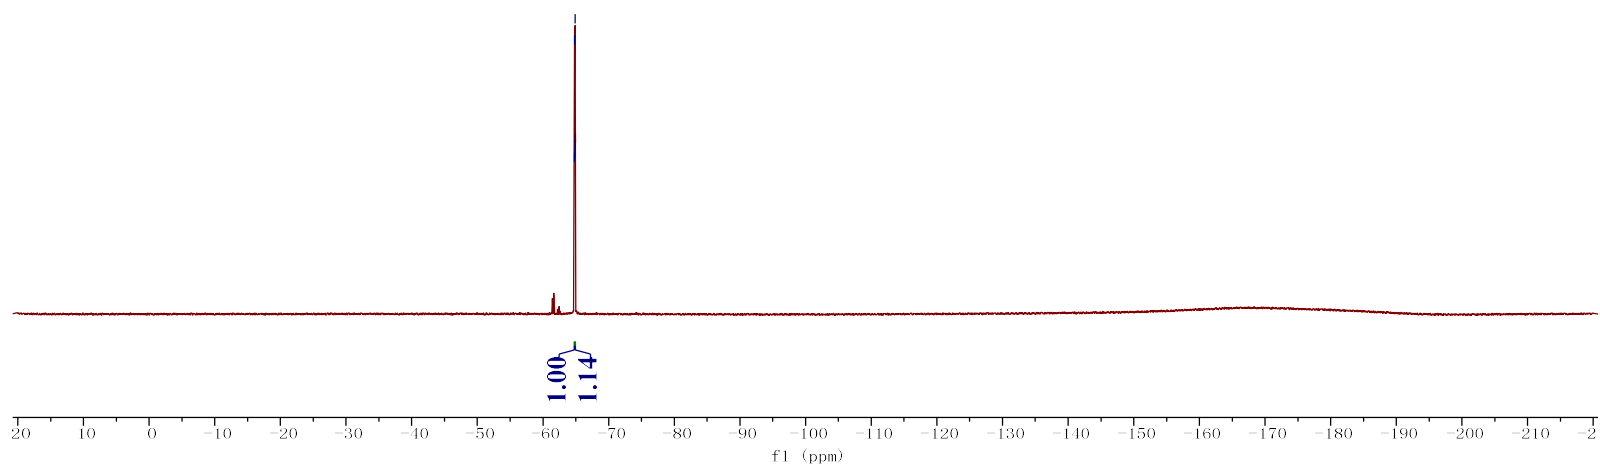

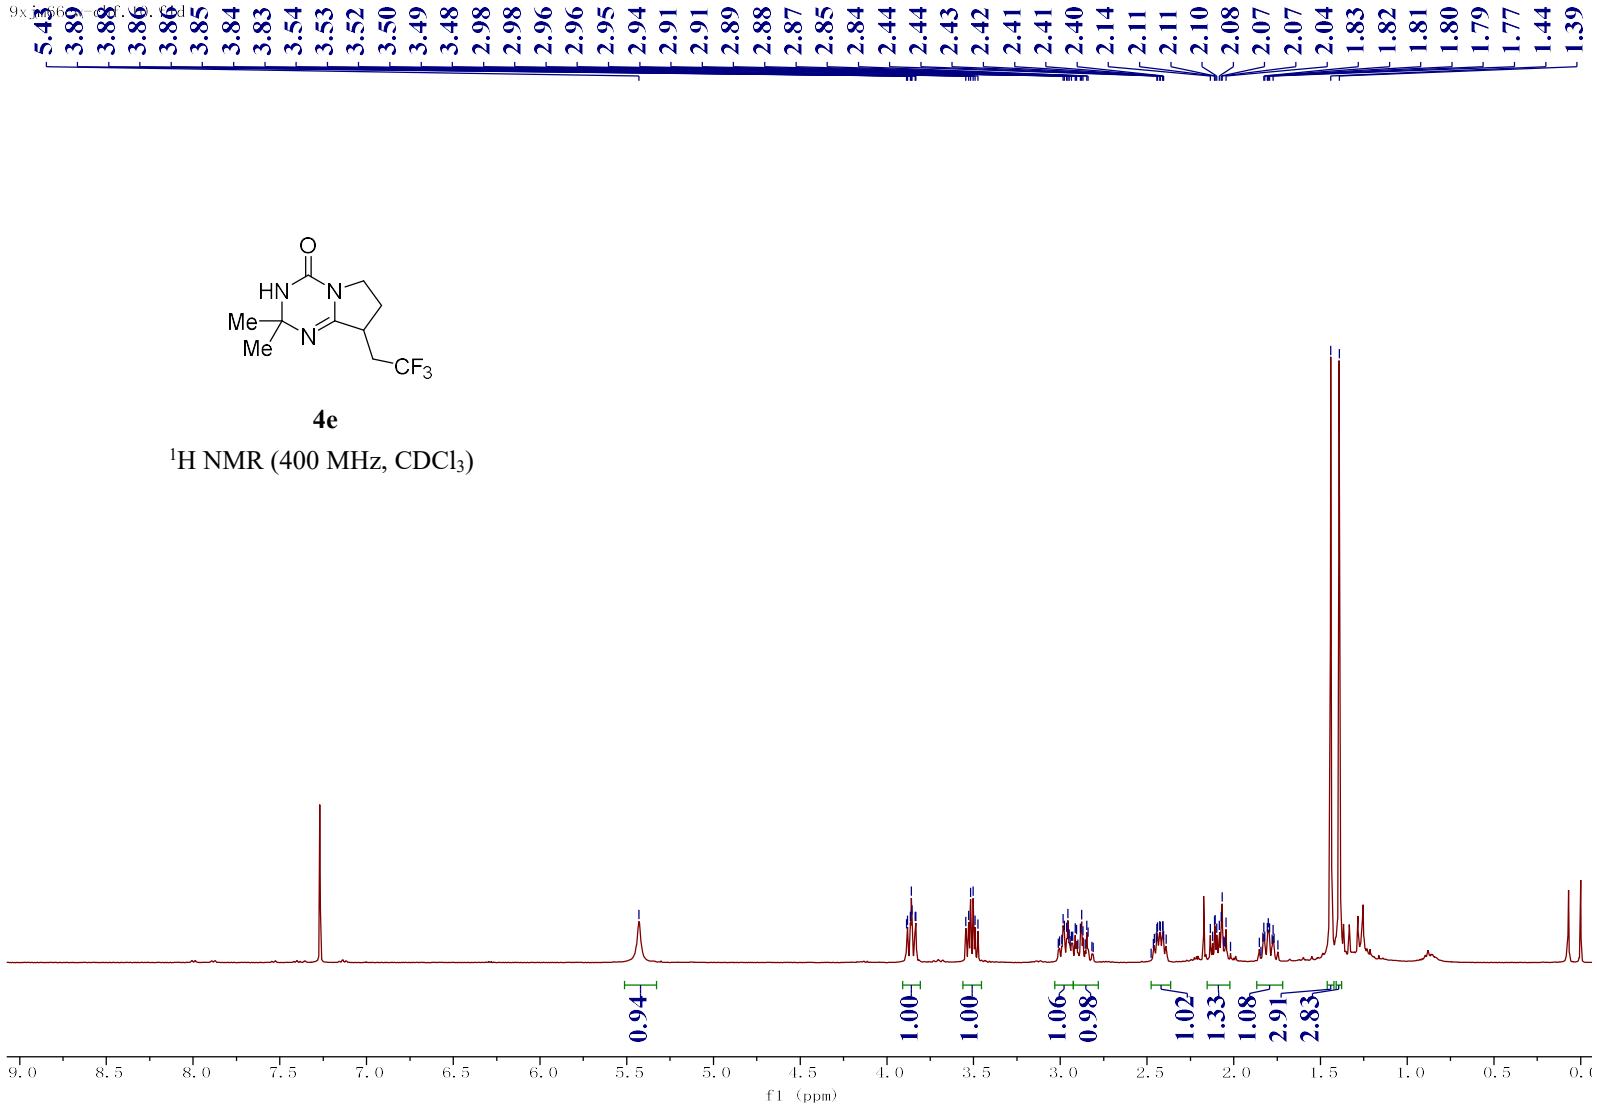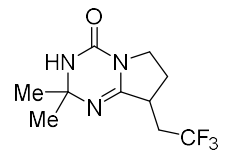

**4e**

<sup>1</sup>H NMR (400 MHz, CDCl<sub>3</sub>)



9xjm66ew-chf. 13. fid

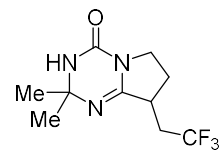

4e

$^{13}\text{C}$  NMR (100 MHz,  $\text{CDCl}_3$ )

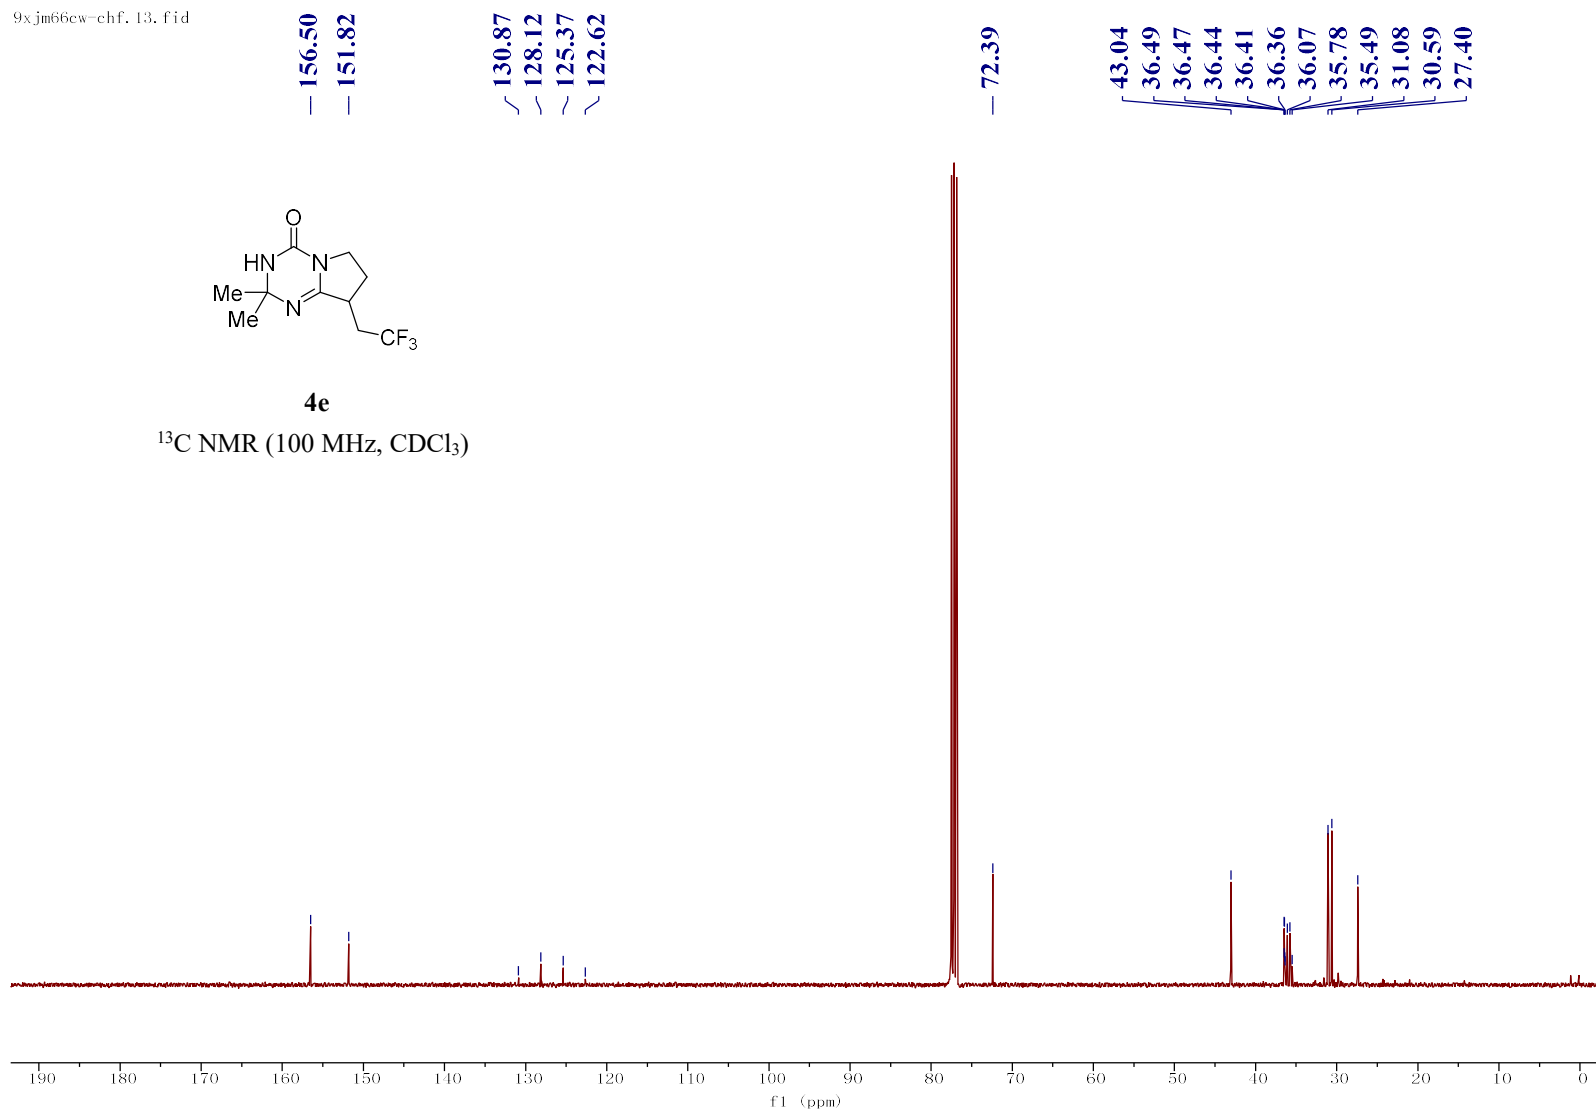

9xjm66ew-CHF. 14. fid

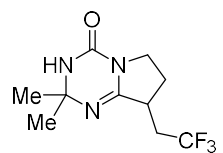

**4e**

$^{19}\text{F}$  NMR (376 MHz,  $\text{CDCl}_3$ )

-64.65  
-64.68  
-64.71

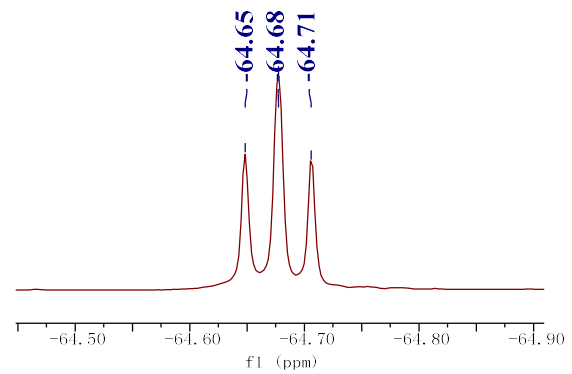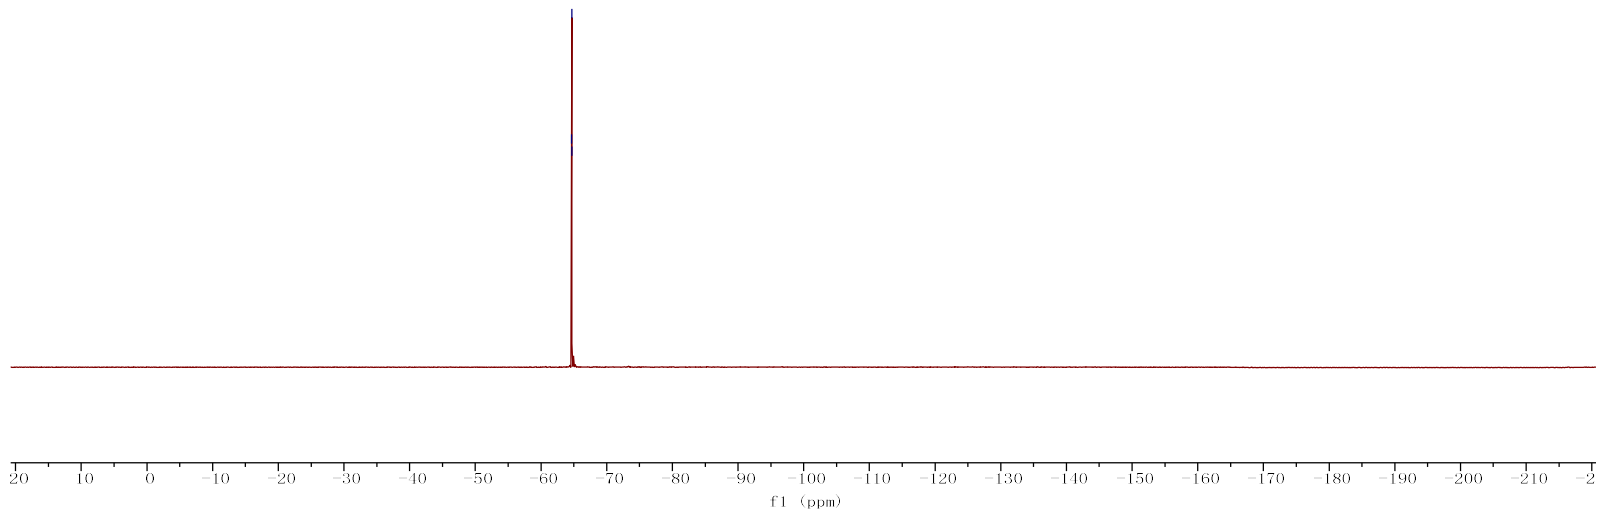

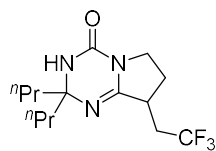

**4f**

<sup>1</sup>H NMR (400 MHz, CDCl<sub>3</sub>)

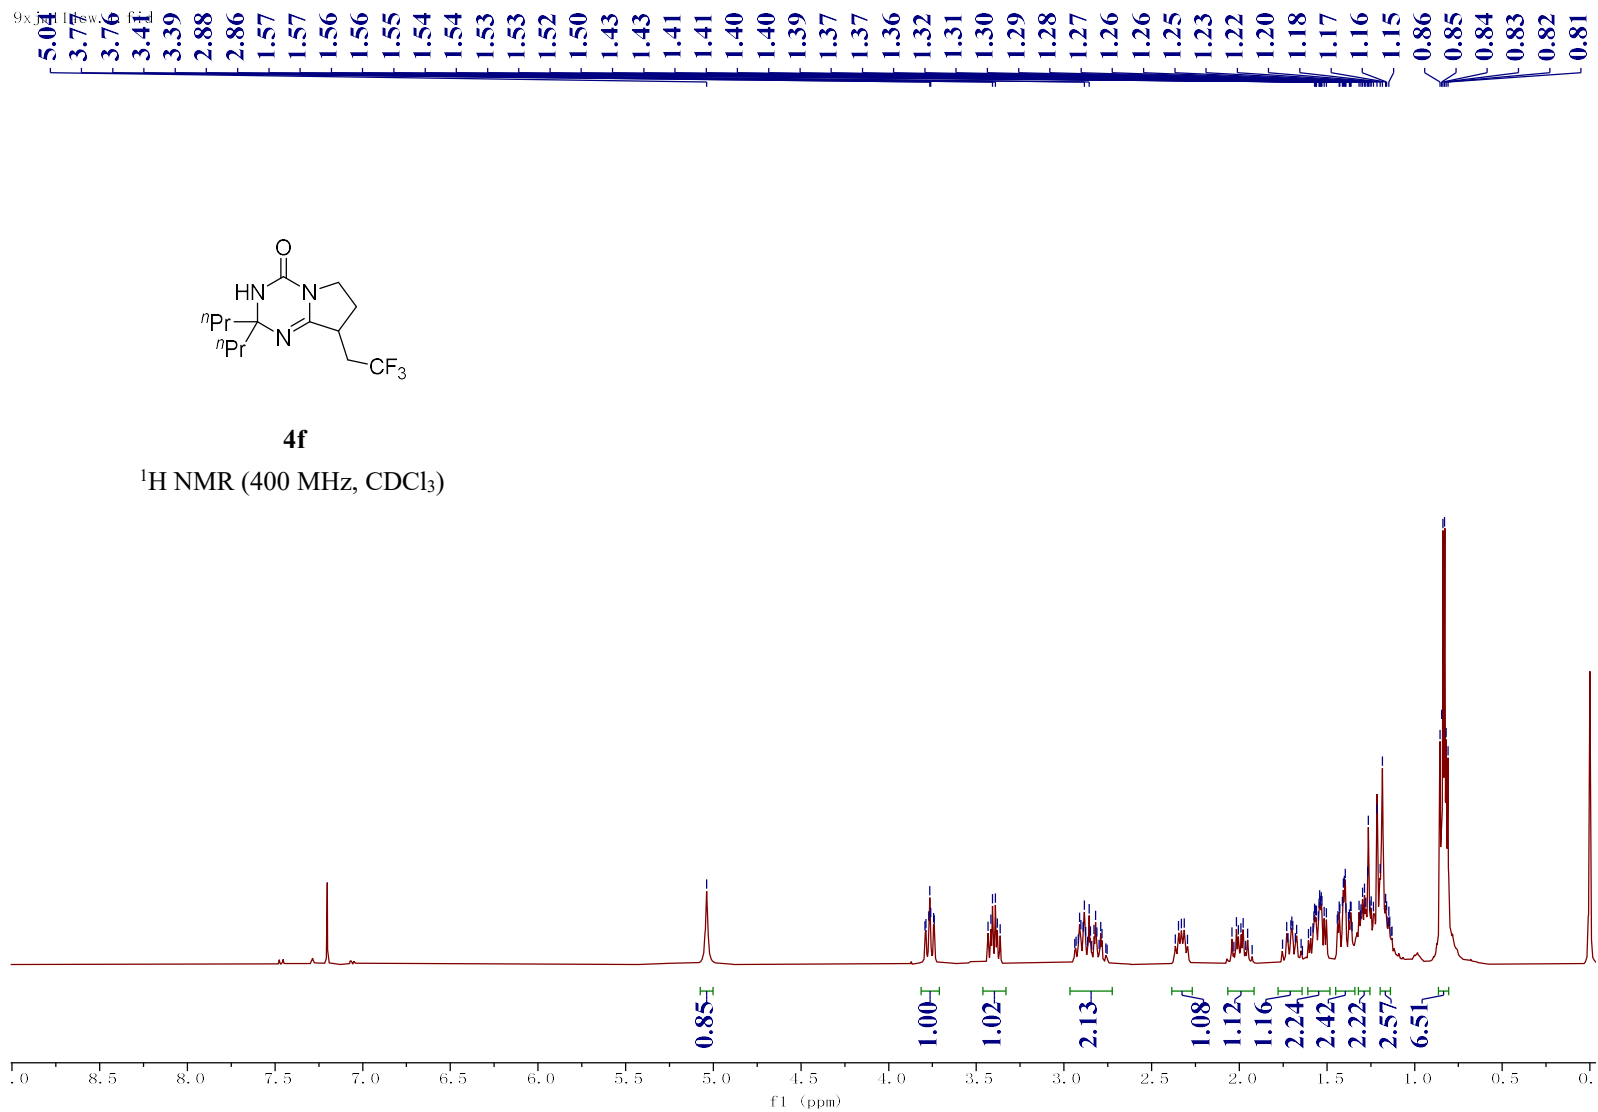

9xjm114ew-2.12.fid

156.12  
151.92

130.91  
128.16  
125.41  
122.35

77.77

45.15  
45.04  
42.71  
36.54  
36.51  
36.48  
36.45  
36.43  
36.15  
35.86  
35.57  
27.37

16.65  
16.55  
14.26  
14.18

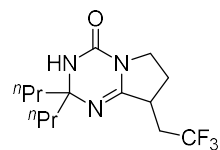

**4f**

<sup>13</sup>C NMR (100 MHz, CDCl<sub>3</sub>)

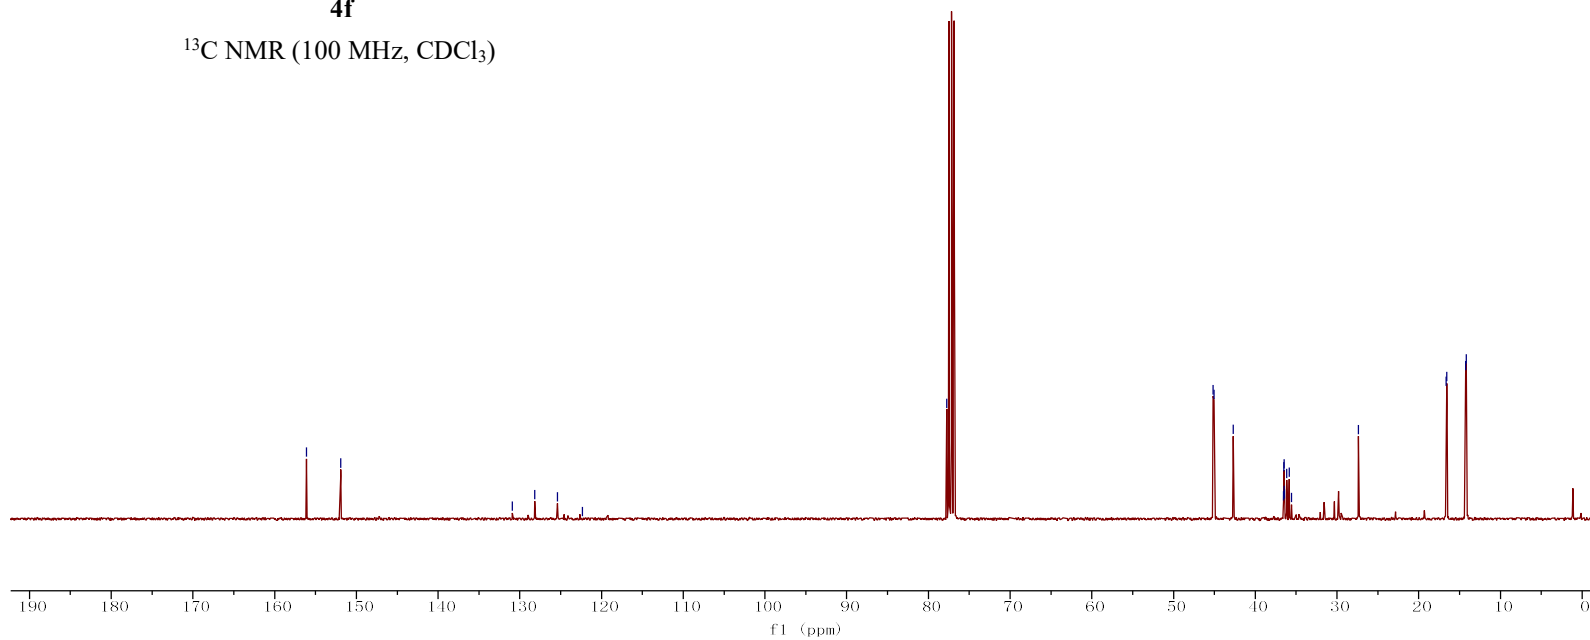

9xjm114ew-2.11.fid

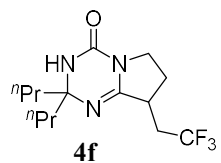

$^{19}\text{F}$  NMR (376 MHz,  $\text{CDCl}_3$ )

-64.66  
-64.69  
-64.72

-64.66  
-64.69  
-64.72

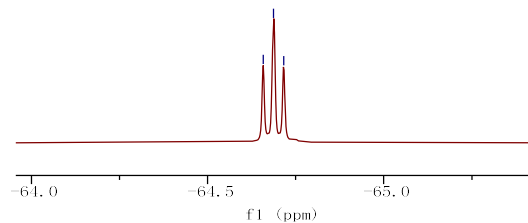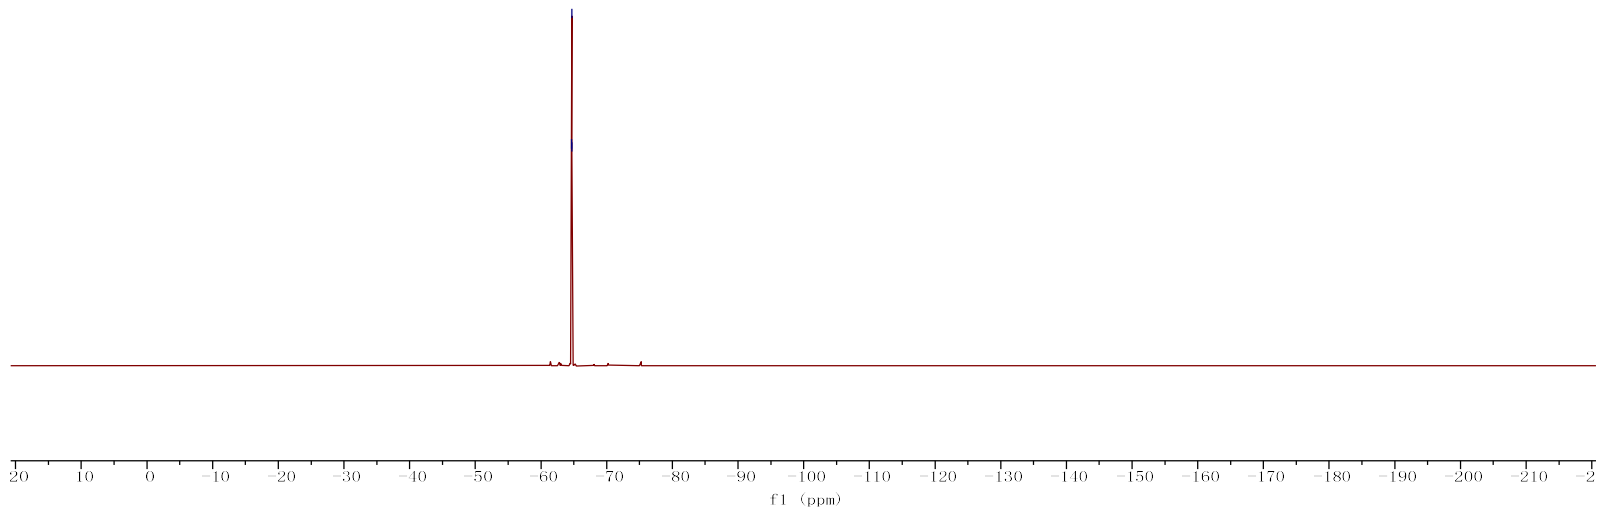

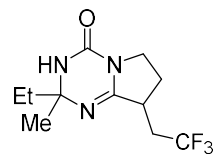

**4g**

<sup>1</sup>H NMR (400 MHz, CDCl<sub>3</sub>)

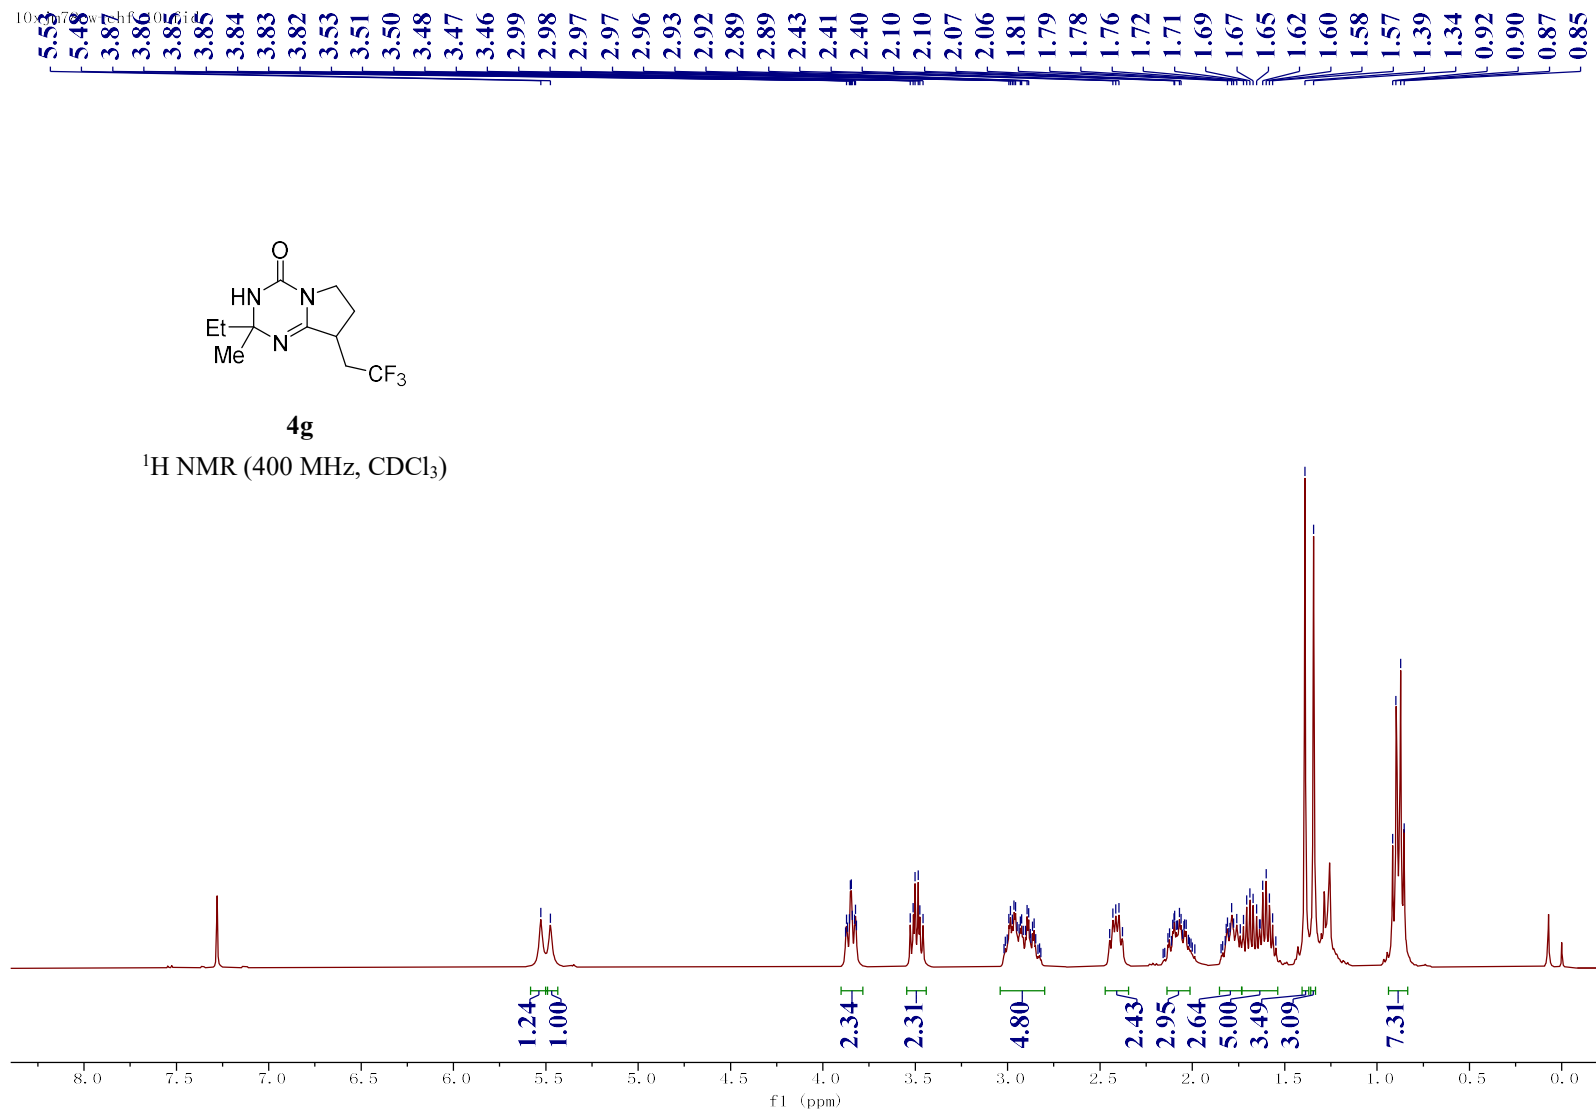

10xjm78ew-cl

156.44  
156.39  
152.07  
151.88

130.86  
128.16  
128.11  
125.41  
125.36  
122.61  
122.57

75.25  
75.14  
42.85  
36.64  
36.61  
36.58  
36.55  
36.43  
36.39  
36.35  
36.33  
36.26  
36.24  
36.22  
36.15  
36.06  
35.86  
35.78  
35.57  
35.49  
29.73  
29.38  
27.41  
27.32  
8.02  
8.02  
7.89

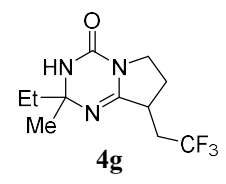

<sup>13</sup>C NMR (100 MHz, CDCl<sub>3</sub>)

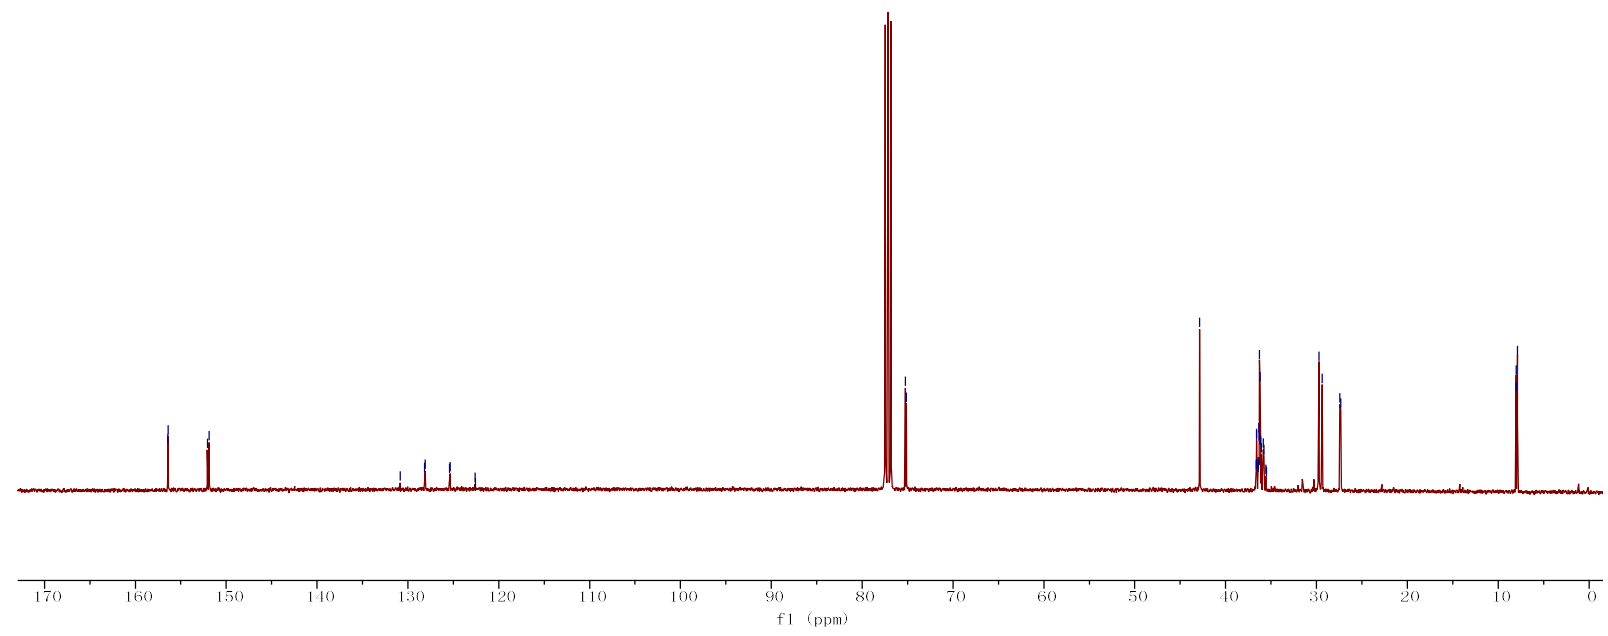

10xjm78ew-CHF. 11. fid

-64.66  
-64.69  
-64.71

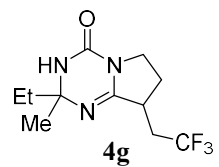

<sup>19</sup>F NMR (376 MHz, CDCl<sub>3</sub>)

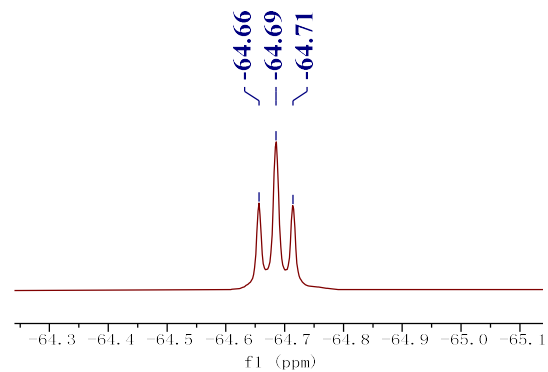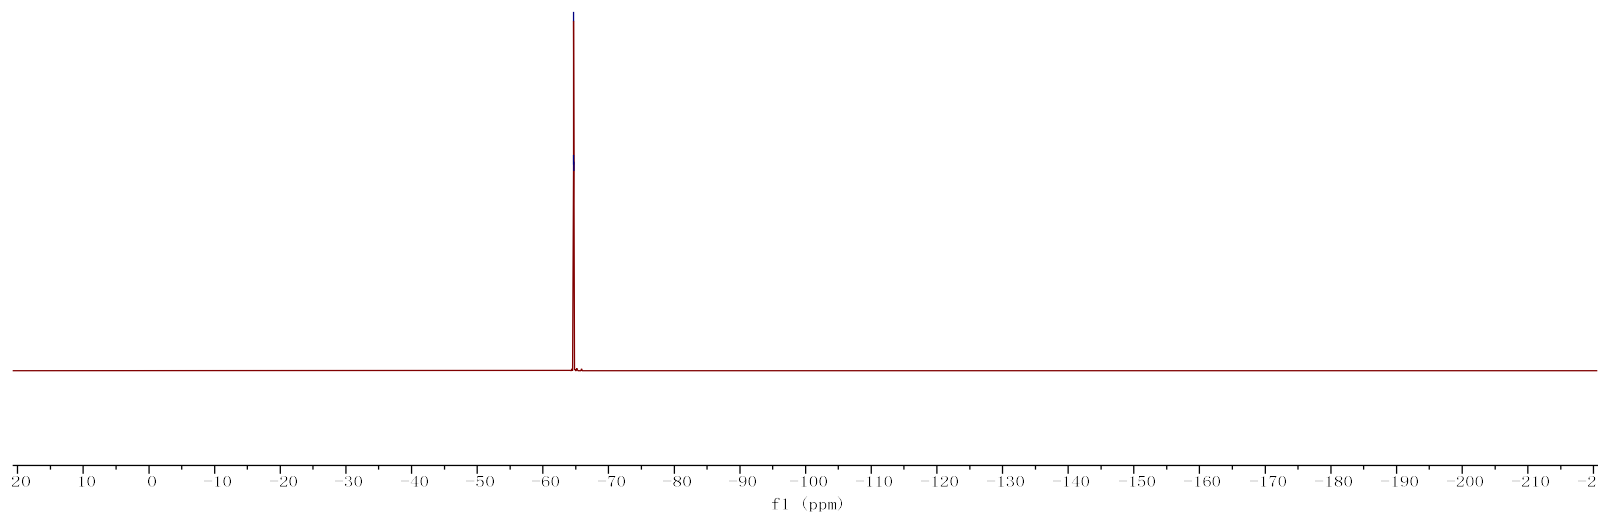



14.2336  
 3.83  
 3.81  
 3.49  
 3.48  
 3.47  
 3.47  
 2.98  
 2.98  
 2.96  
 2.96  
 2.94  
 2.94  
 2.93  
 2.43  
 2.42  
 2.40  
 2.39  
 2.38  
 2.37  
 2.37  
 2.36  
 2.35  
 2.27  
 2.27  
 2.26  
 2.25  
 2.24  
 2.23  
 2.22  
 2.21  
 2.20  
 2.20  
 2.18  
 2.18  
 2.16  
 2.12  
 2.09  
 1.97  
 1.97  
 1.95  
 1.81  
 1.79  
 1.77  
 1.76  
 1.75  
 1.74  
 1.74  
 1.73

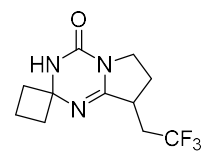

**4h**

<sup>1</sup>H NMR (500 MHz, CDCl<sub>3</sub>)

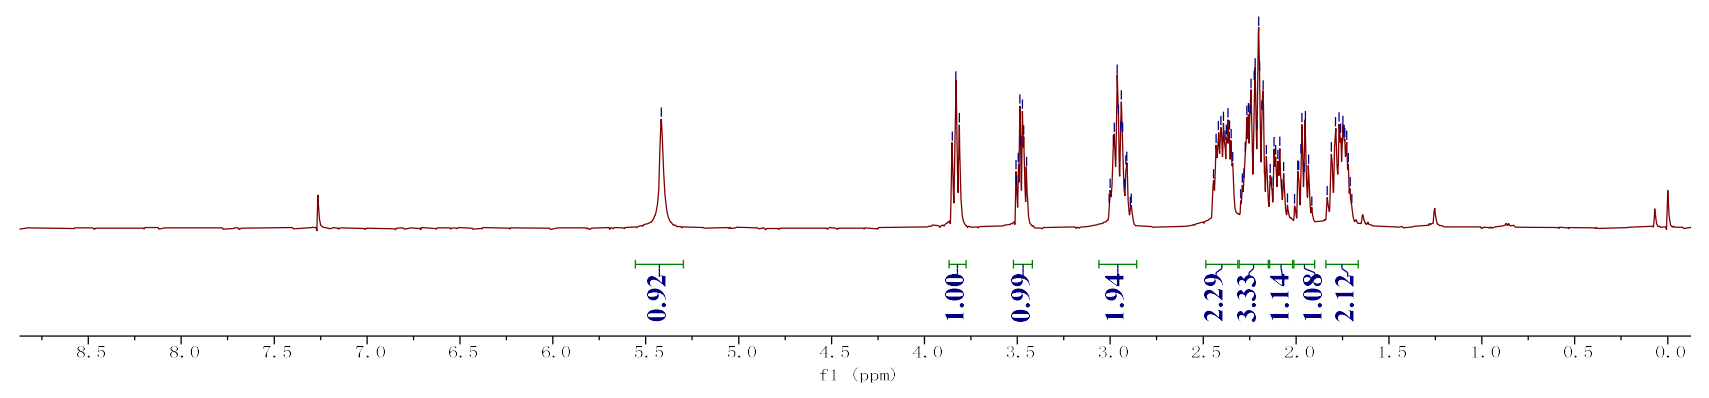

9xjm106cv.12.fid

— 156.19  
— 151.51

— 130.91  
— 128.16  
— 125.41  
— 122.66

— 75.14

— 42.89  
— 40.93  
— 40.07  
— 36.40  
— 36.37  
— 36.34  
— 36.31  
— 36.07  
— 35.79  
— 35.50  
— 27.40

— 12.80

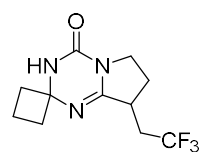

**4h**

<sup>13</sup>C NMR (100 MHz, CDCl<sub>3</sub>)

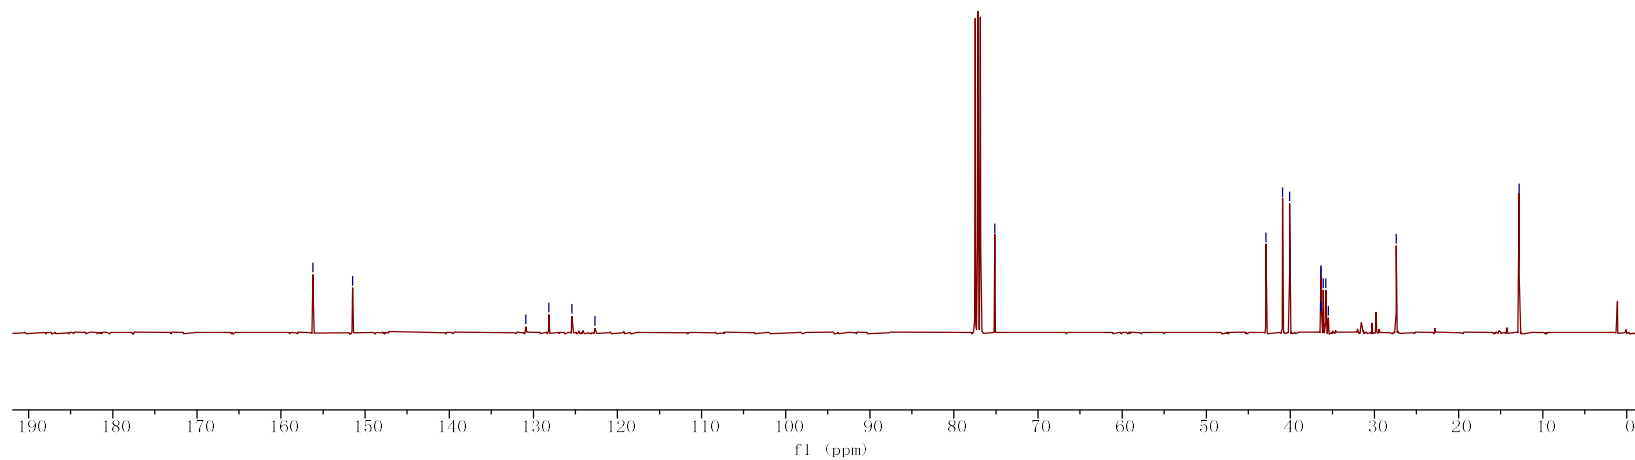

9xjm106cw. 11. fid

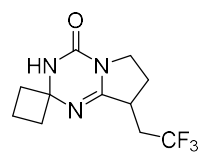

**4h**

<sup>19</sup>F NMR (376 MHz, CDCl<sub>3</sub>)

-64.65  
-64.68  
-64.71

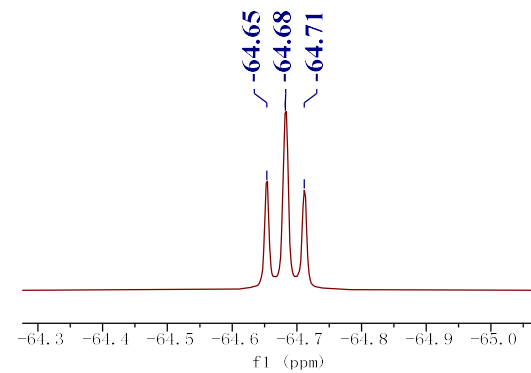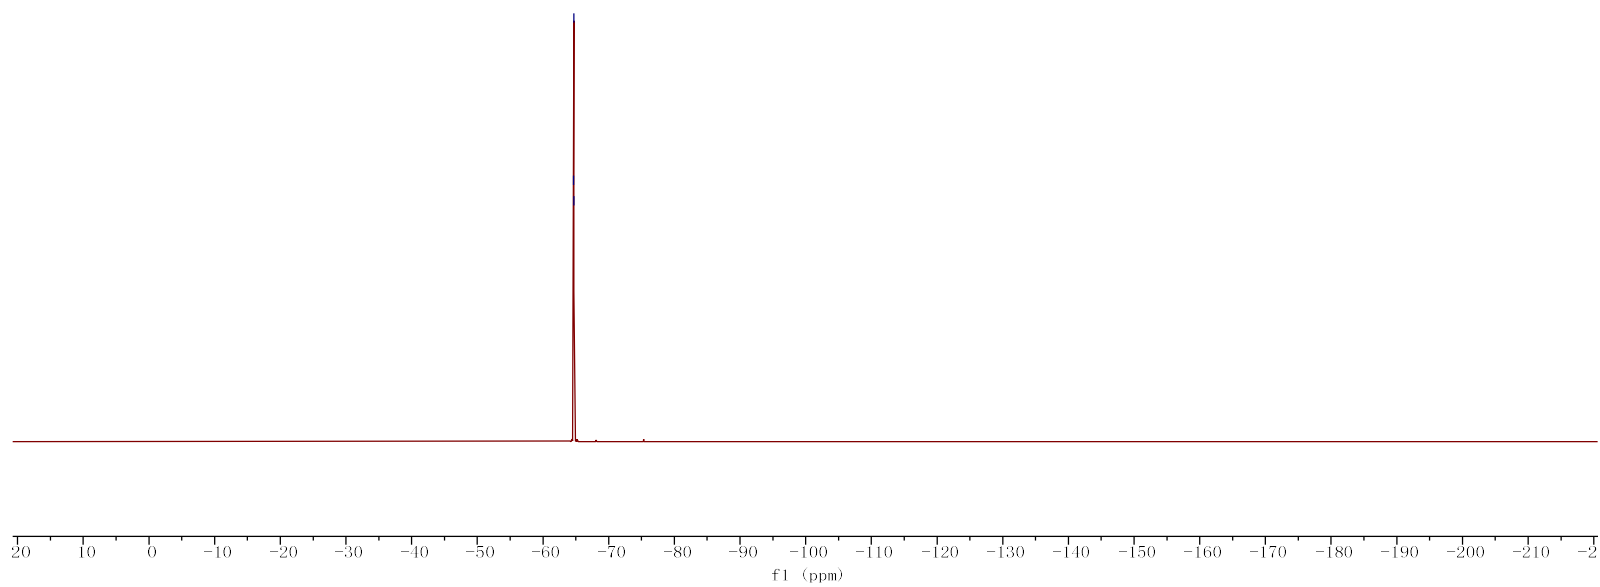

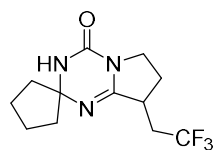

**4i**

<sup>1</sup>H NMR (400 MHz, CDCl<sub>3</sub>)

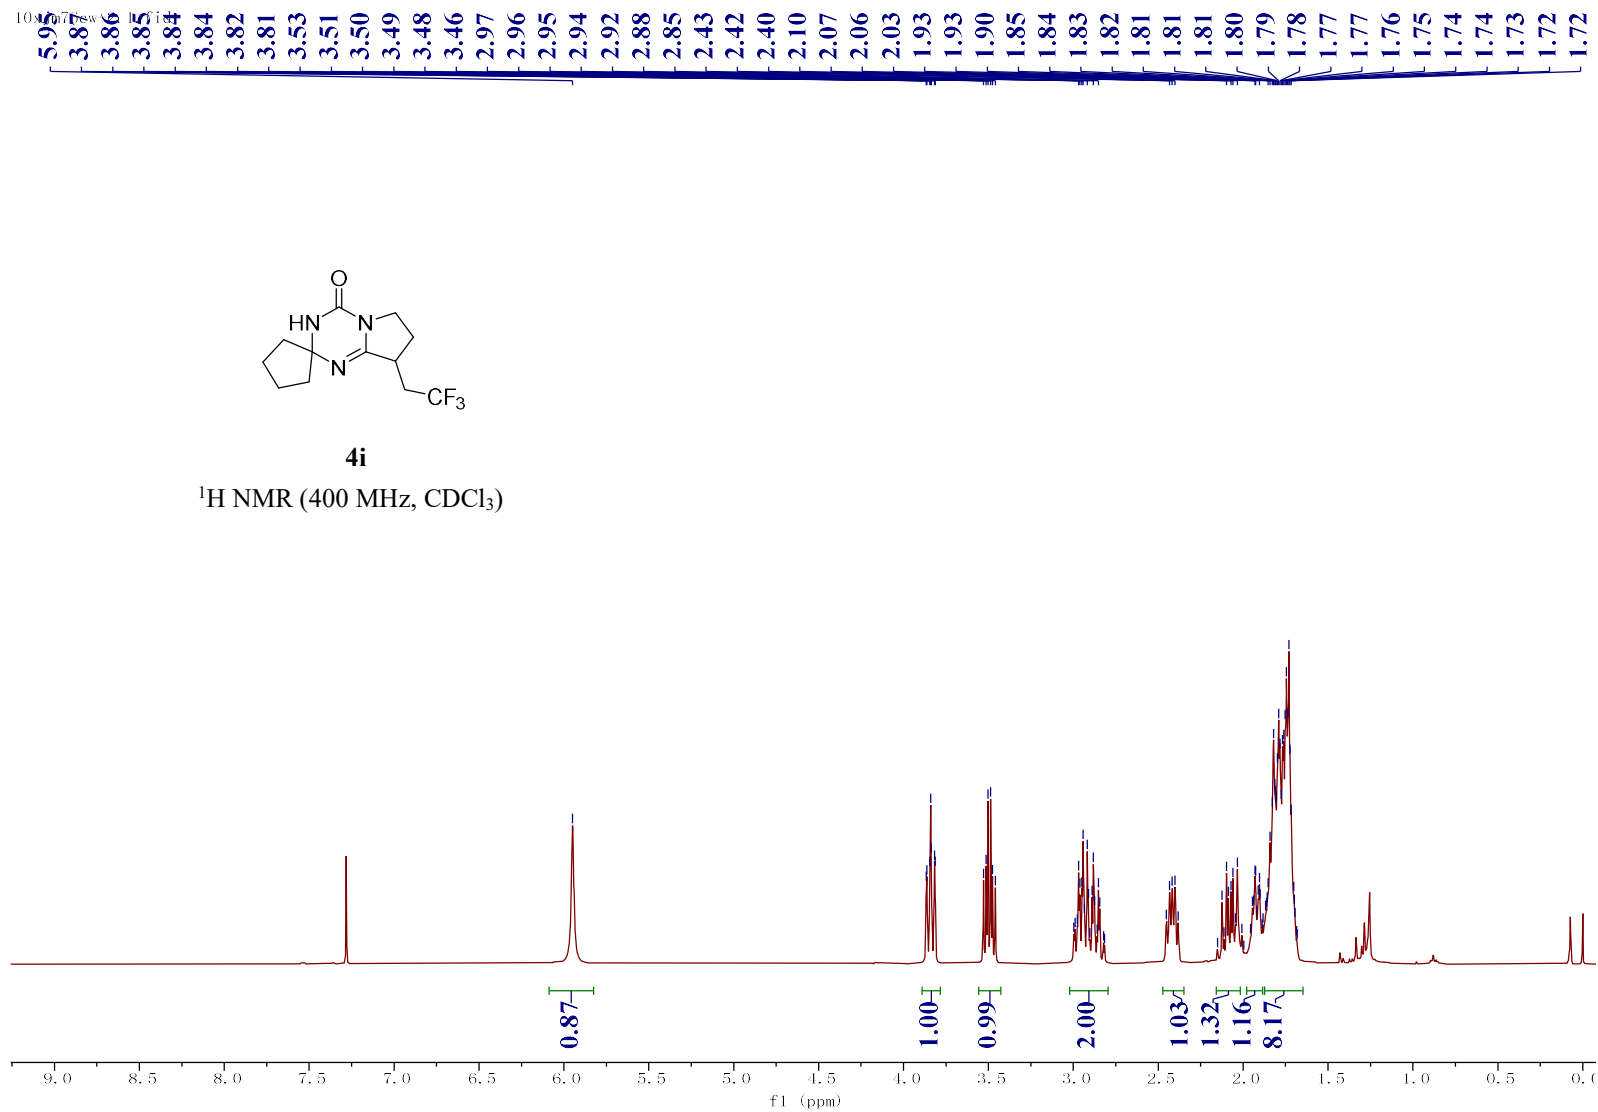

10xjm76ew-chf. 12. fid

— 156.25  
— 152.23

∩ 130.91  
∩ 128.16  
∩ 125.41  
∩ 122.66

— 82.09

— 42.96  
— 42.06  
— 41.91  
— 36.36  
— 36.33  
— 36.30  
— 36.27  
— 36.08  
— 35.79  
— 35.51  
— 27.43  
— 22.87  
— 22.75

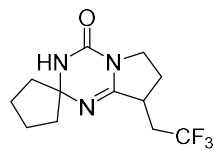

**4i**

<sup>13</sup>C NMR (100 MHz, CDCl<sub>3</sub>)

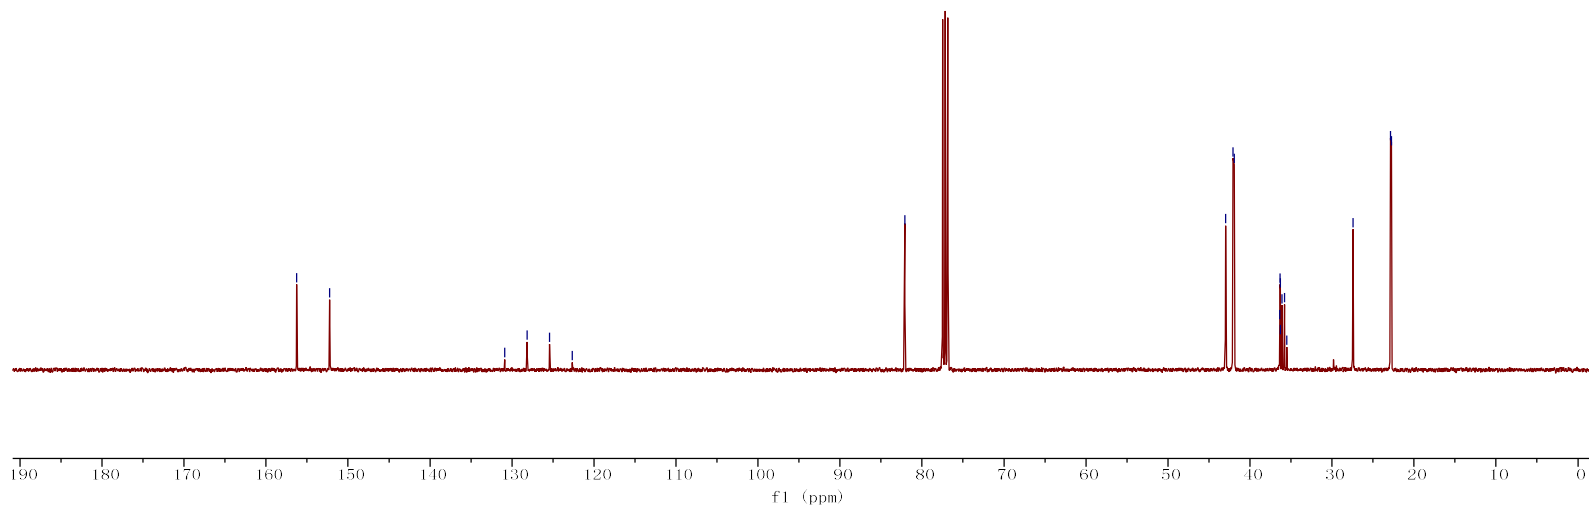

10xjm76ew-CHF. 11. fid

-64.64  
-64.67  
-64.70

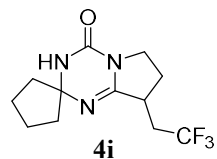

$^{19}\text{F}$  NMR (376 MHz,  $\text{CDCl}_3$ )

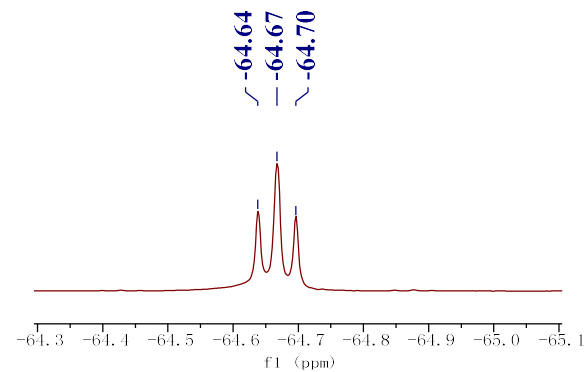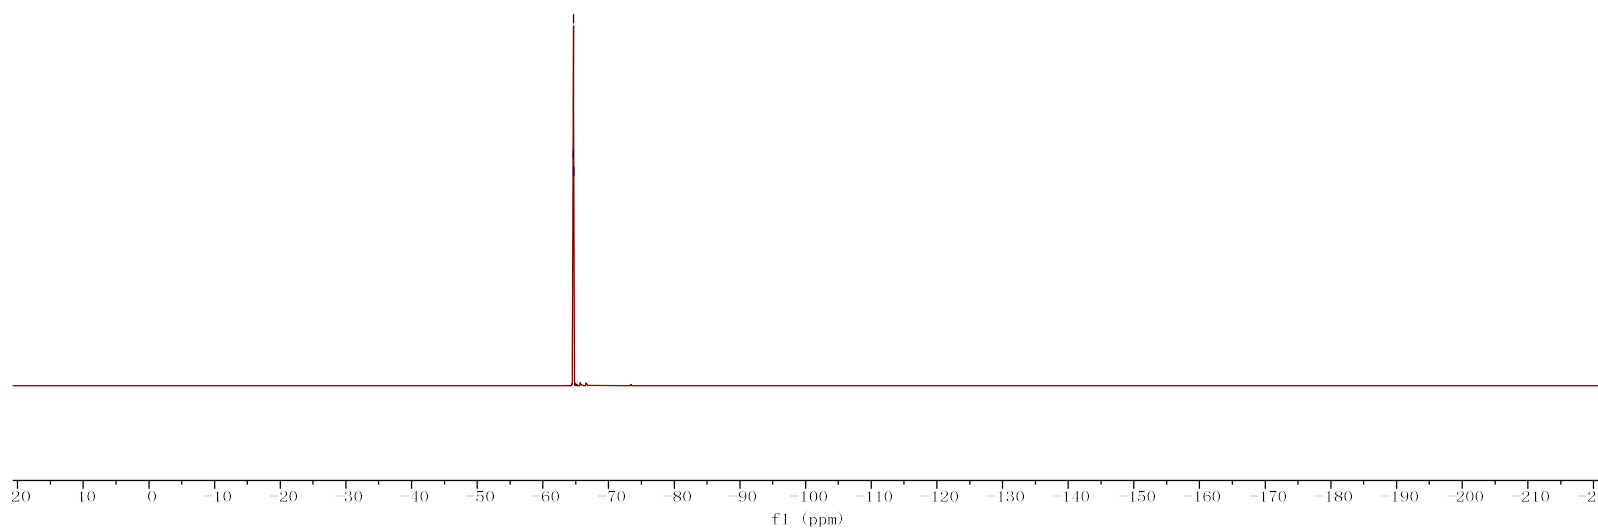

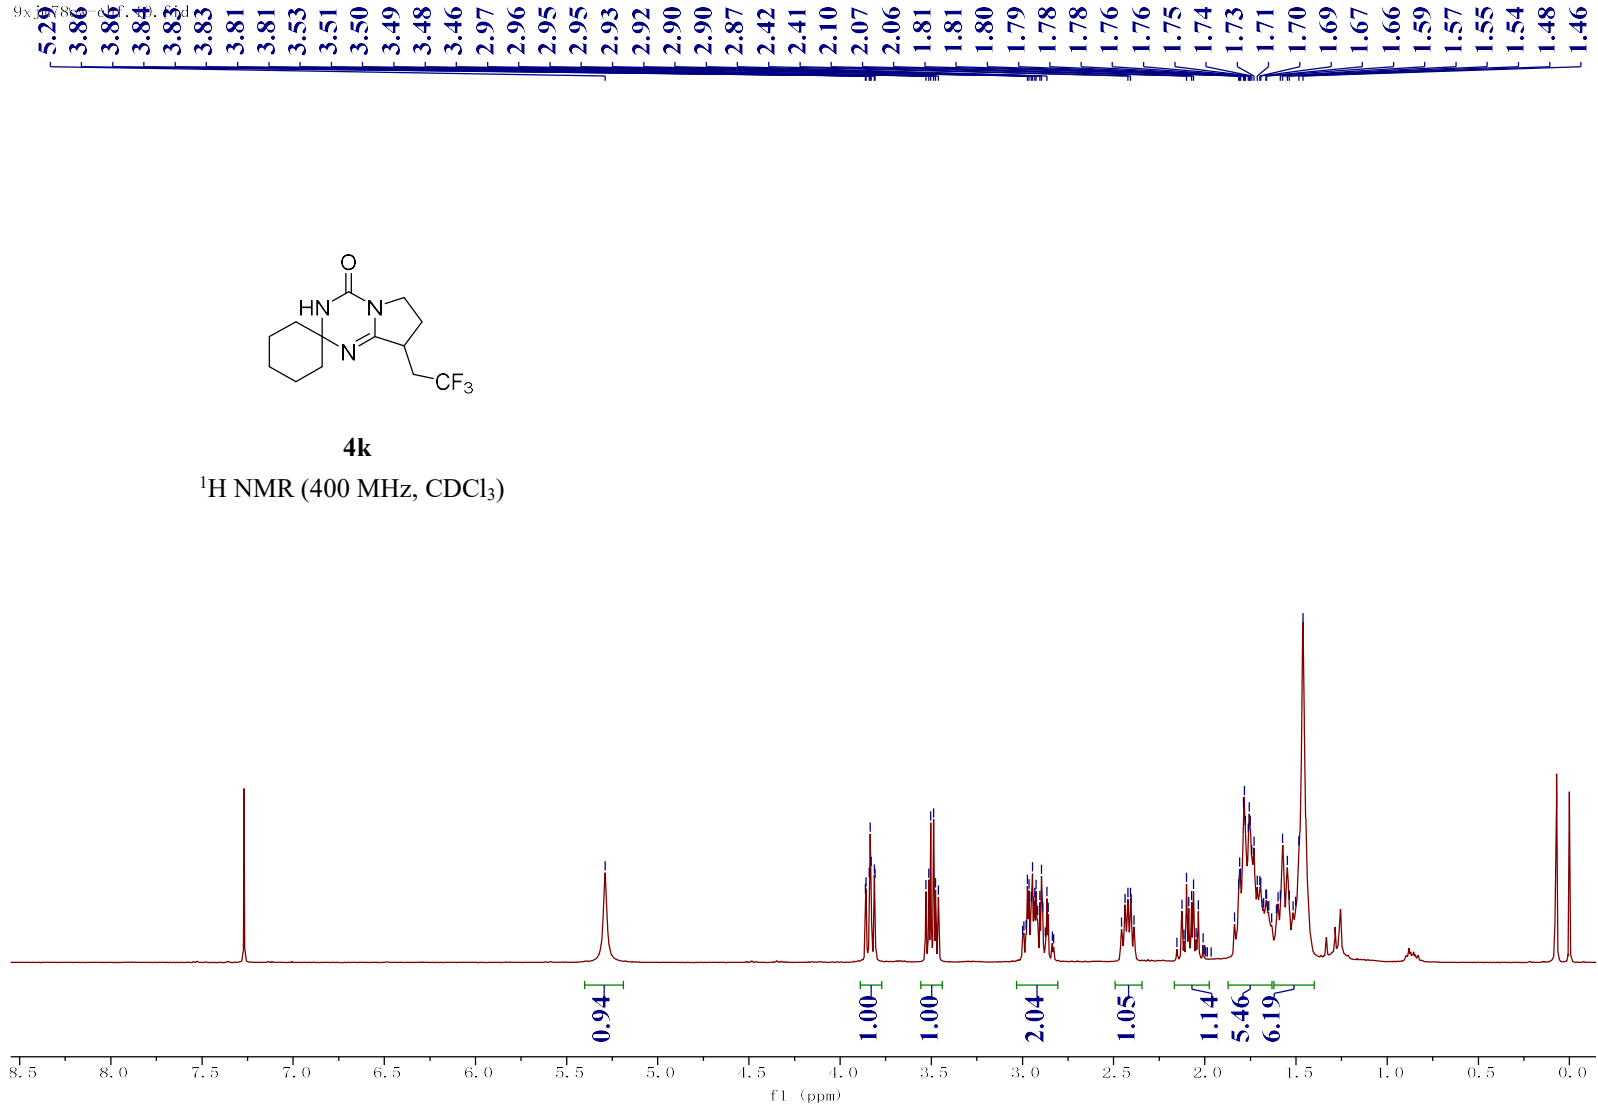

9xjm78ew-chf. 11. fid

— 156.12  
— 151.77

✓ 130.93  
✓ 128.18  
✓ 125.43  
✓ 122.68

✓ 73.62  
✓ 42.98  
✓ 39.45  
✓ 39.12  
✓ 36.46  
✓ 36.43  
✓ 36.40  
✓ 36.37  
✓ 36.14  
✓ 35.86  
✓ 35.57  
✓ 27.49  
✓ 25.15  
✓ 21.94  
✓ 21.85

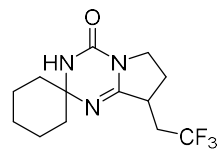

**4k**

<sup>13</sup>C NMR (100 MHz, CDCl<sub>3</sub>)

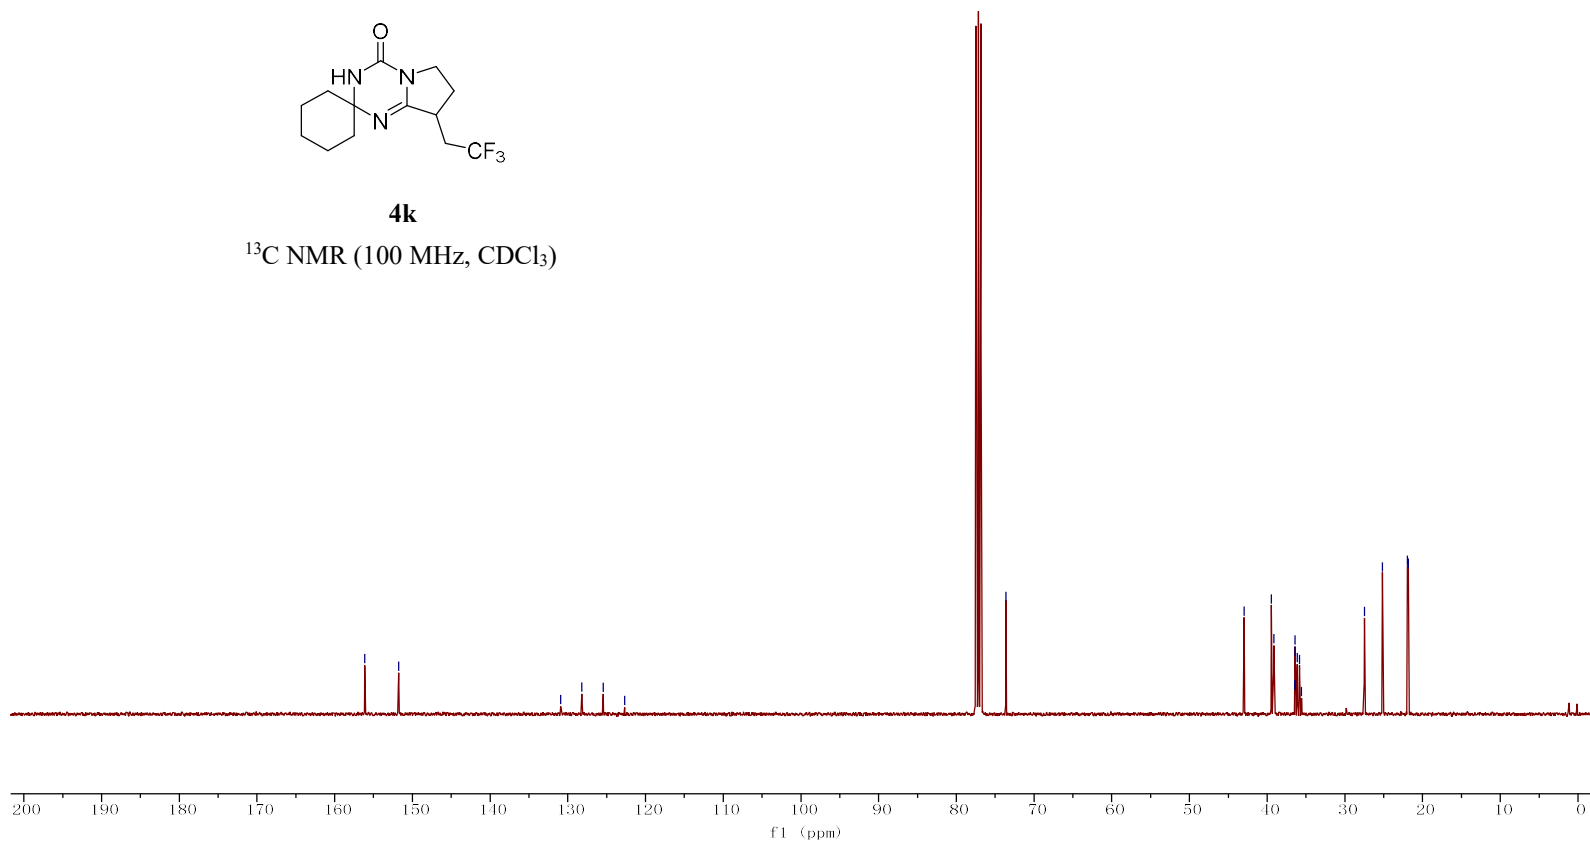



9xjm78cw-chf. 12. fid

-64.61  
-64.64  
-64.67

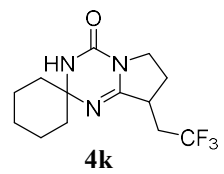

<sup>19</sup>F NMR (376 MHz, CDCl<sub>3</sub>)

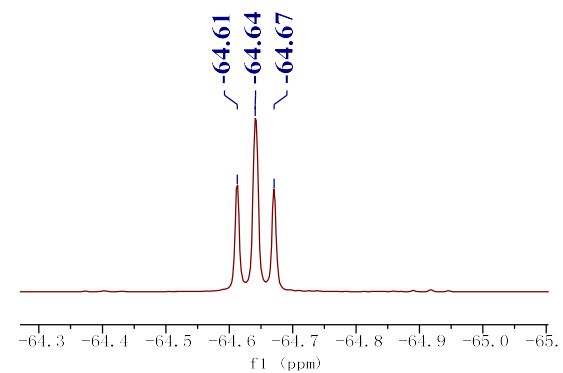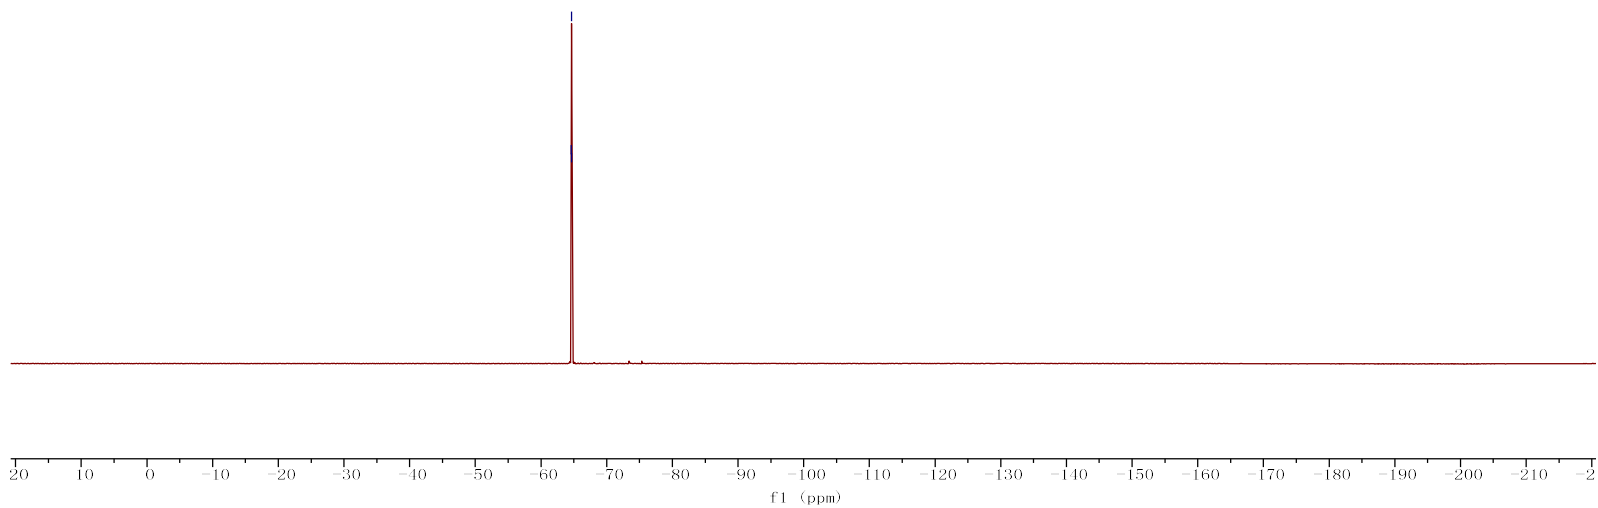

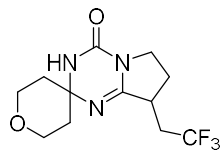

**41**

<sup>1</sup>H NMR (500 MHz, CDCl<sub>3</sub>)

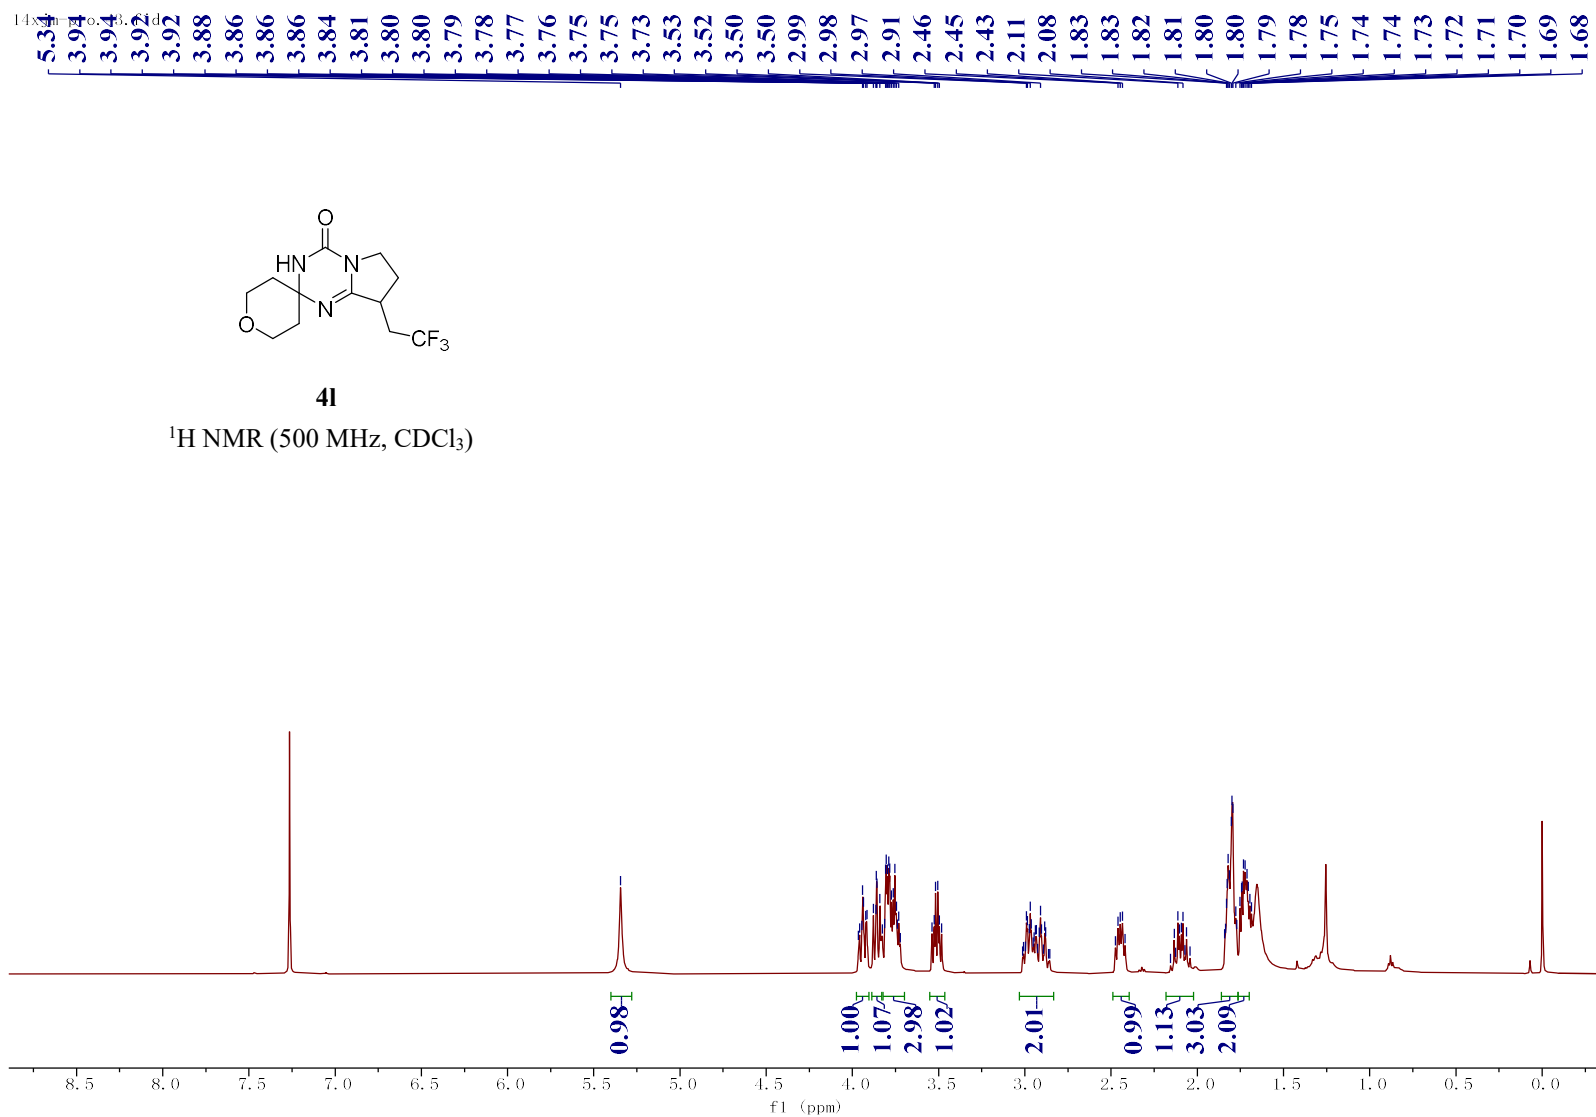

9XJM87CW-3, 12, fid

— 156.59  
— 151.65  
~ 130.87  
~ 128.12  
~ 125.37  
~ 122.62

71.23  
64.04  
64.01  
43.08  
40.39  
40.17  
36.59  
36.57  
36.54  
36.51  
36.32  
36.03  
35.74  
35.45  
— 27.49

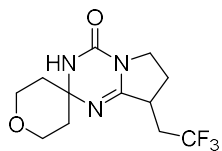

**41**

<sup>13</sup>C NMR (100 MHz, CDCl<sub>3</sub>)

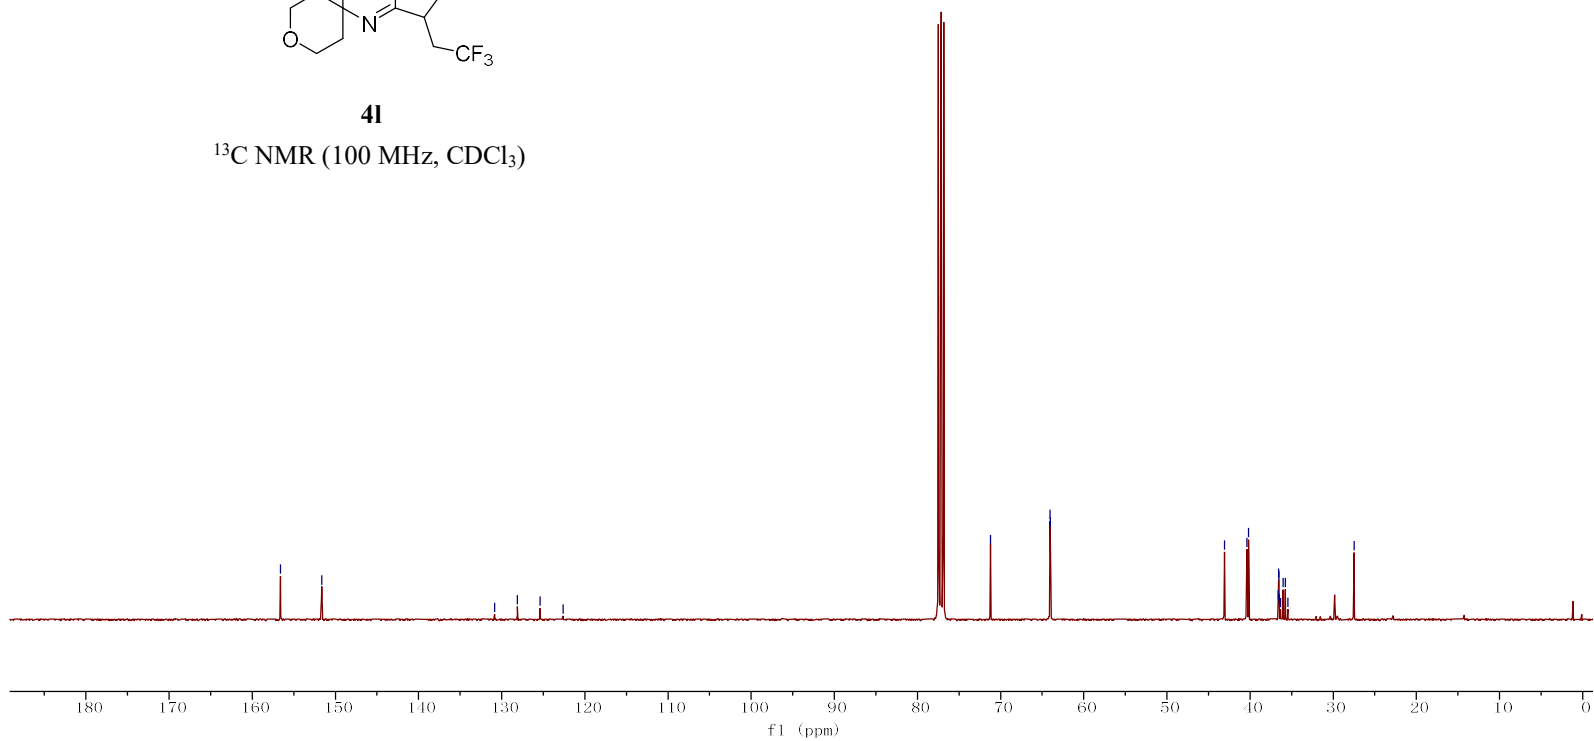

9XJM87CW-3, 13, fid

-64.58  
-64.61  
-64.64

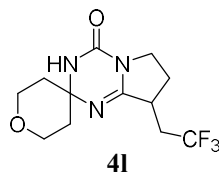

<sup>19</sup>F NMR (376 MHz, CDCl<sub>3</sub>)

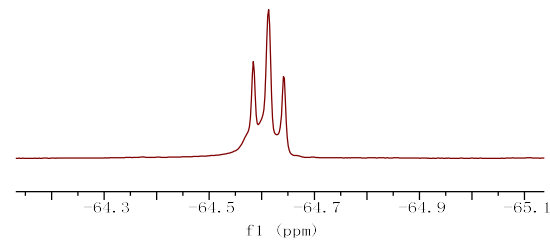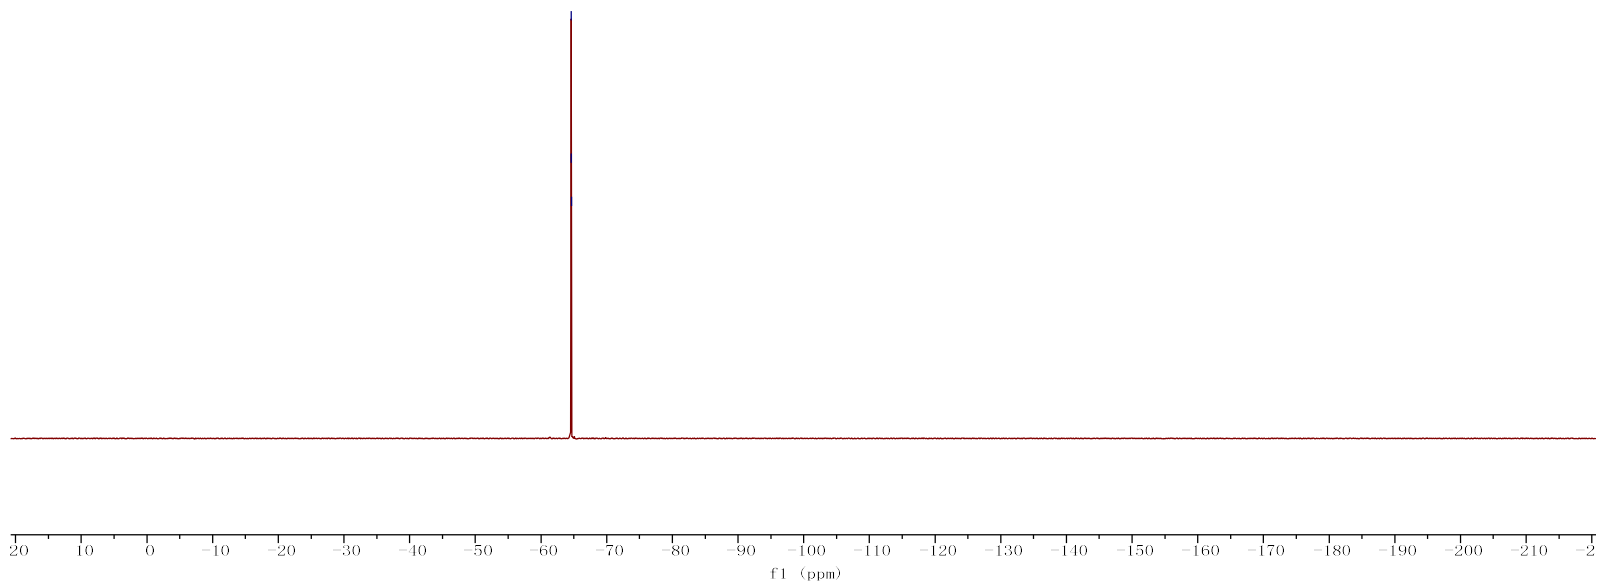

9x  
 7.35  
 7.32  
 7.31  
 7.30  
 7.30  
 7.29  
 7.28  
 7.27  
 7.27  
 7.26  
 7.25  
 7.24  
 7.24  
 7.23  
 7.22  
 7.22  
 7.22  
 7.21  
 7.21  
 7.20  
 7.19  
 7.18  
 5.67  
 3.71  
 3.70  
 3.69  
 3.68  
 3.67  
 3.52  
 3.52  
 3.51  
 3.50  
 3.50  
 3.49  
 2.70  
 2.67  
 2.66  
 2.63  
 2.28  
 2.25  
 2.24  
 2.21  
 2.01  
 1.99  
 1.95  
 1.95  
 1.94  
 1.93

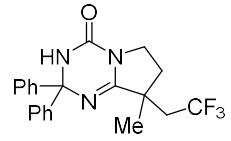

**4m**

<sup>1</sup>H NMR (400 MHz, CDCl<sub>3</sub>)

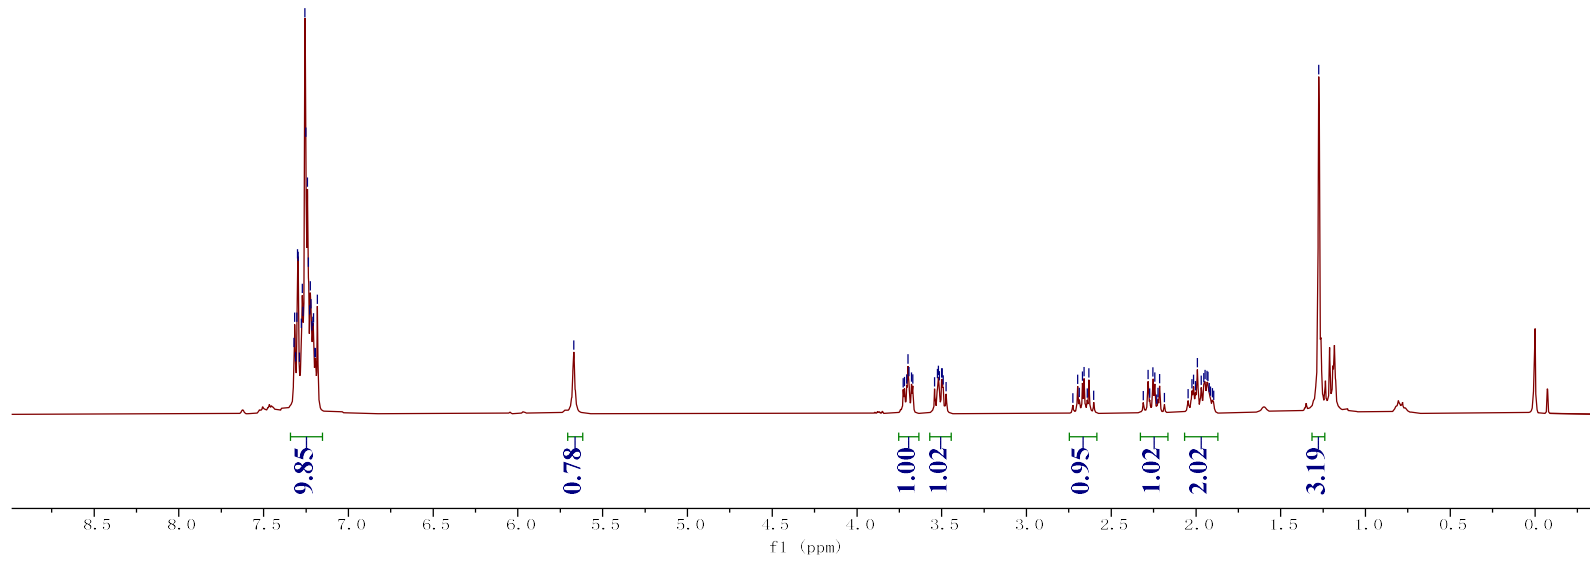

9xjm51cw\_12.fid

160.14  
150.08  
144.24  
143.87  
127.31  
127.24  
126.87  
126.84  
126.78  
125.22  
125.11  
124.11  
77.99  
40.98  
40.81  
40.59  
40.31  
40.04  
39.76  
31.61  
22.29

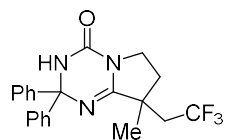

**4m**

<sup>13</sup>C NMR (100 MHz, CDCl<sub>3</sub>)

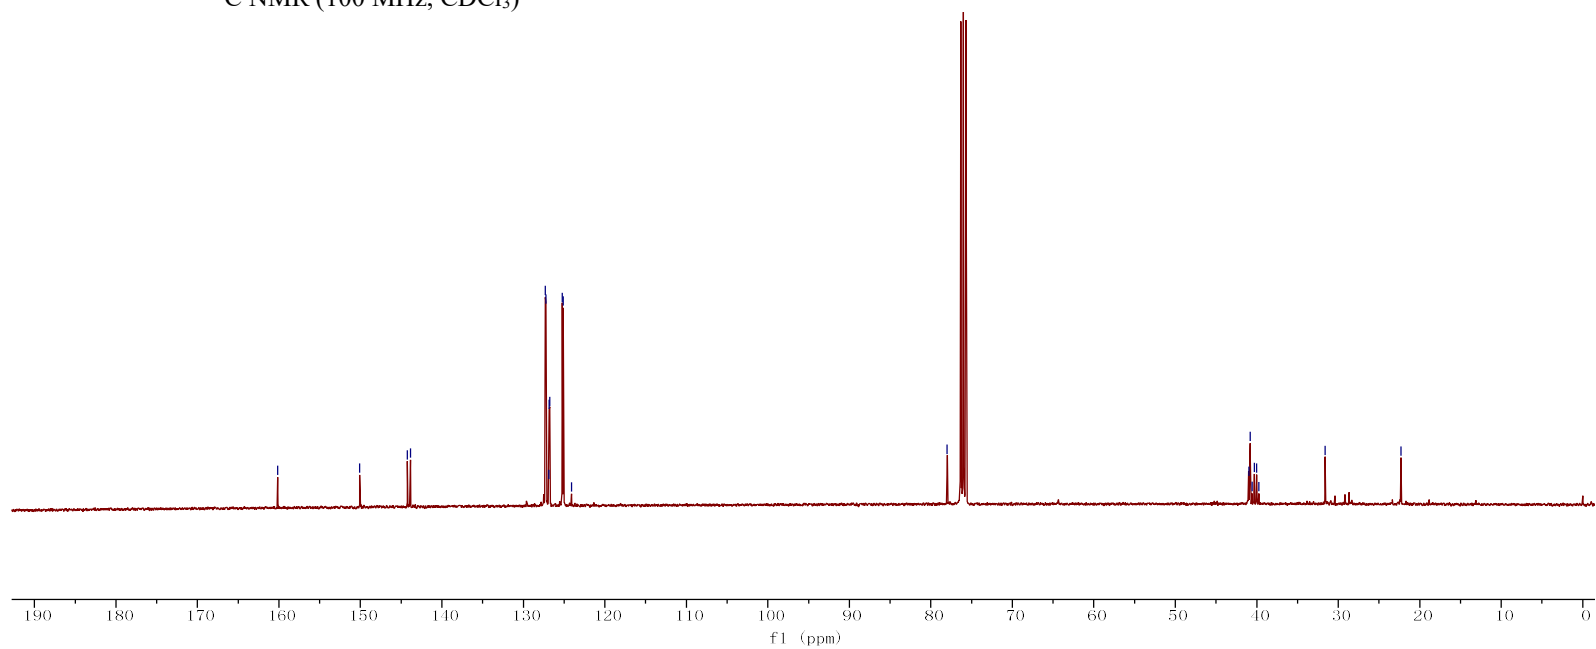

9xjm51cw.11.fid

-60.28  
-60.31  
-60.34

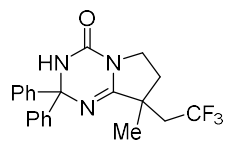

**4m**

<sup>19</sup>F NMR (376 MHz, CDCl<sub>3</sub>)

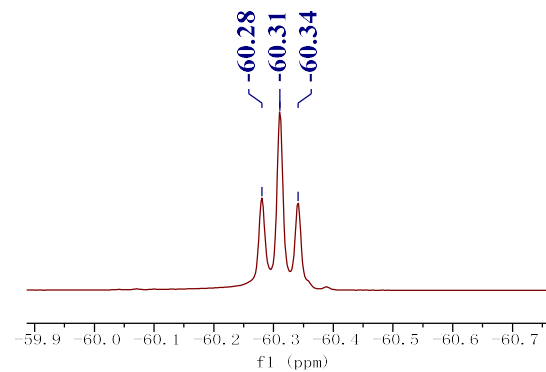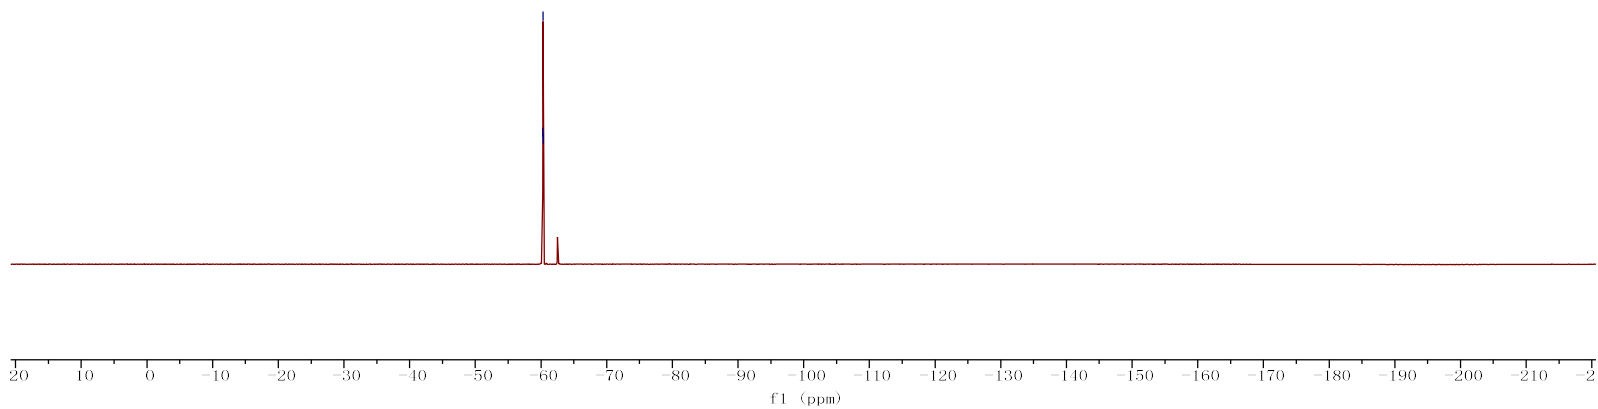

7.46  
7.46  
7.44  
7.43  
7.42  
7.41  
7.39  
7.37  
7.35  
7.34  
7.33  
7.32  
7.31  
7.30  
7.30  
7.29  
7.27  
7.26  
5.59  
3.88  
3.86  
3.85  
3.83  
3.39  
3.38  
3.36  
3.35  
3.34  
3.32  
3.13  
3.12  
3.10  
3.09  
3.07  
3.06  
2.88  
2.86  
2.84  
2.83  
2.80  
2.79  
2.78  
2.77  
2.75  
2.74  
2.29  
2.27  
2.26  
2.24  
2.23

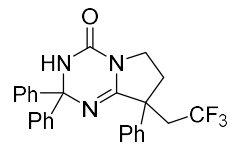

**4n**

<sup>1</sup>H NMR (400 MHz, CDCl<sub>3</sub>)

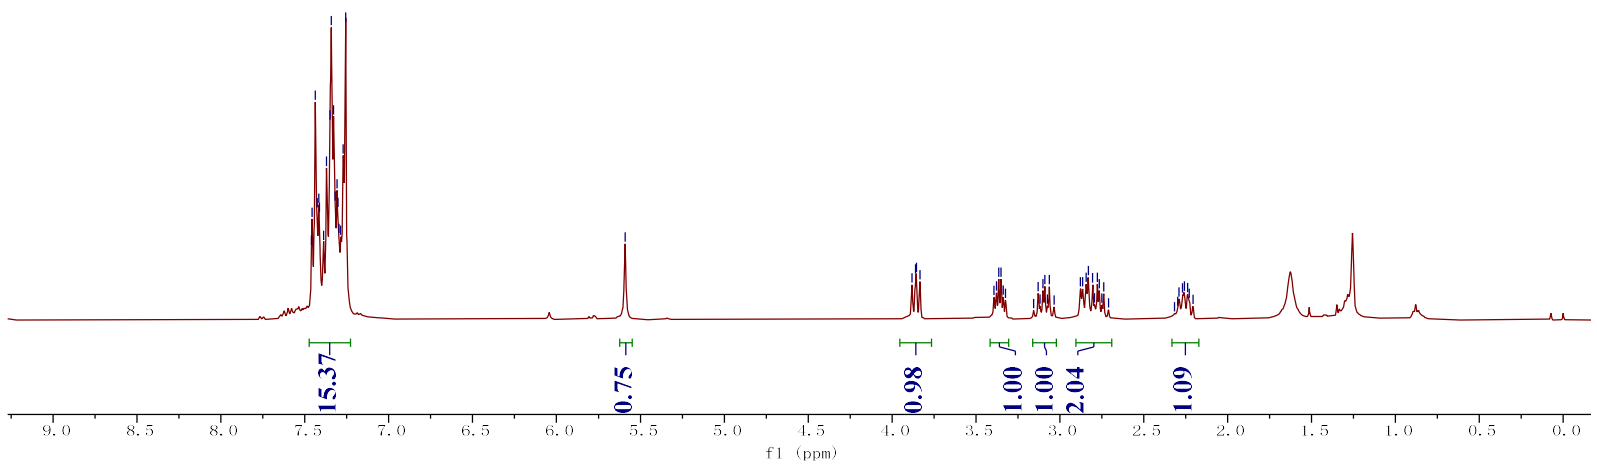



x-28-2.12.fid

159.27  
151.01  
145.12  
144.86  
137.88  
129.00  
128.90  
128.49  
128.08  
128.06  
126.63  
126.34  
126.23  
79.66  
49.24  
49.22  
43.34  
43.06  
42.79  
42.52  
41.90  
31.32

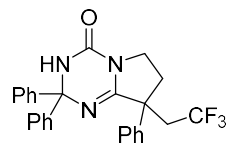

**4n**

<sup>13</sup>C NMR (100 MHz, CDCl<sub>3</sub>)

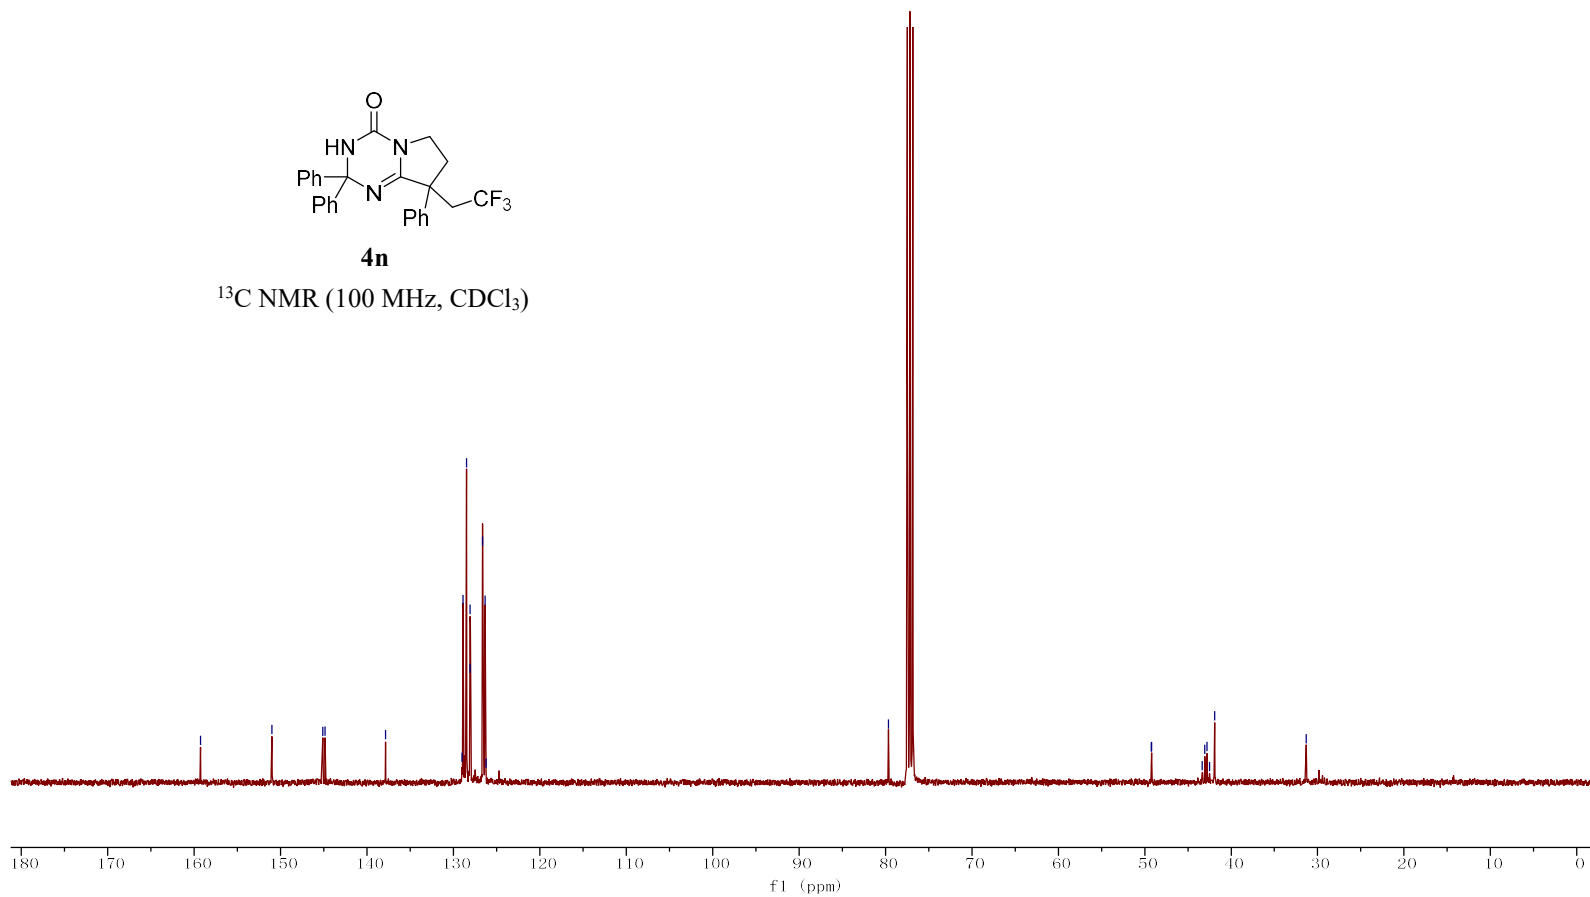

x-28-2.11.fid

-60.17  
-60.20  
-60.23

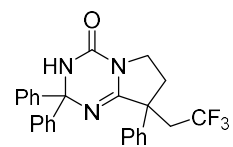

**4n**

<sup>19</sup>F NMR (376 MHz, CDCl<sub>3</sub>)

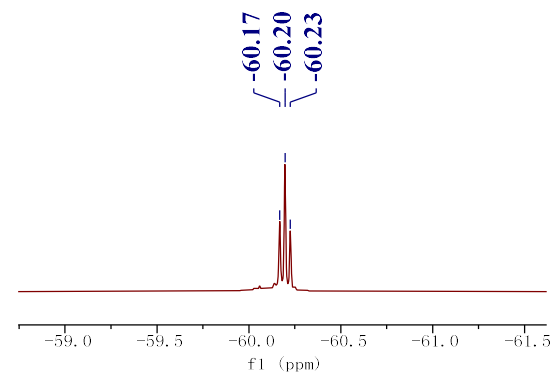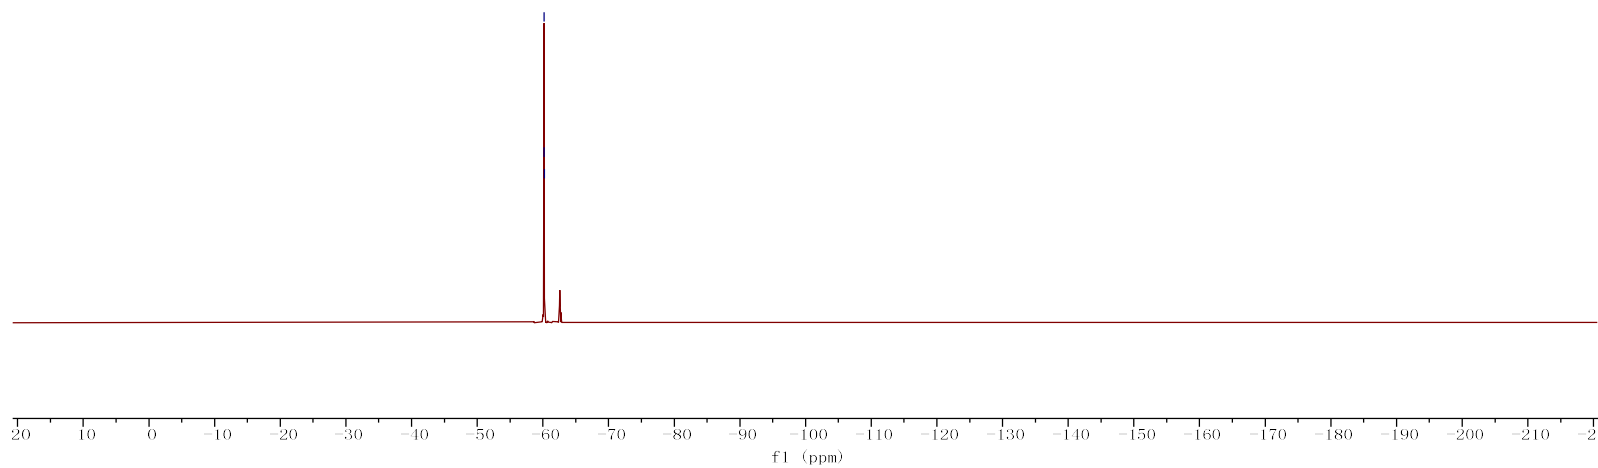

10.000  
 7.35  
7.34  
7.33  
7.30  
7.29  
7.27  
7.26  
5.62  
3.82  
3.81  
3.80  
3.79  
3.78  
3.77  
3.76  
3.56  
3.54  
3.53  
3.51  
3.51  
3.49  
3.34  
3.32  
3.29  
3.27  
2.28  
2.26  
2.23  
2.22  
2.21  
2.20  
1.98  
1.97  
1.95  
1.94  
1.92  
1.91  
1.90  
1.89  
1.87  
1.85  
1.85  
1.83  
1.81  
1.80  
1.79  
1.78  
1.77  
1.75

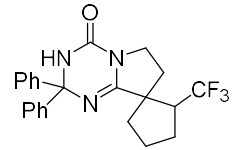

**40**

<sup>1</sup>H NMR (400 MHz, CDCl<sub>3</sub>)

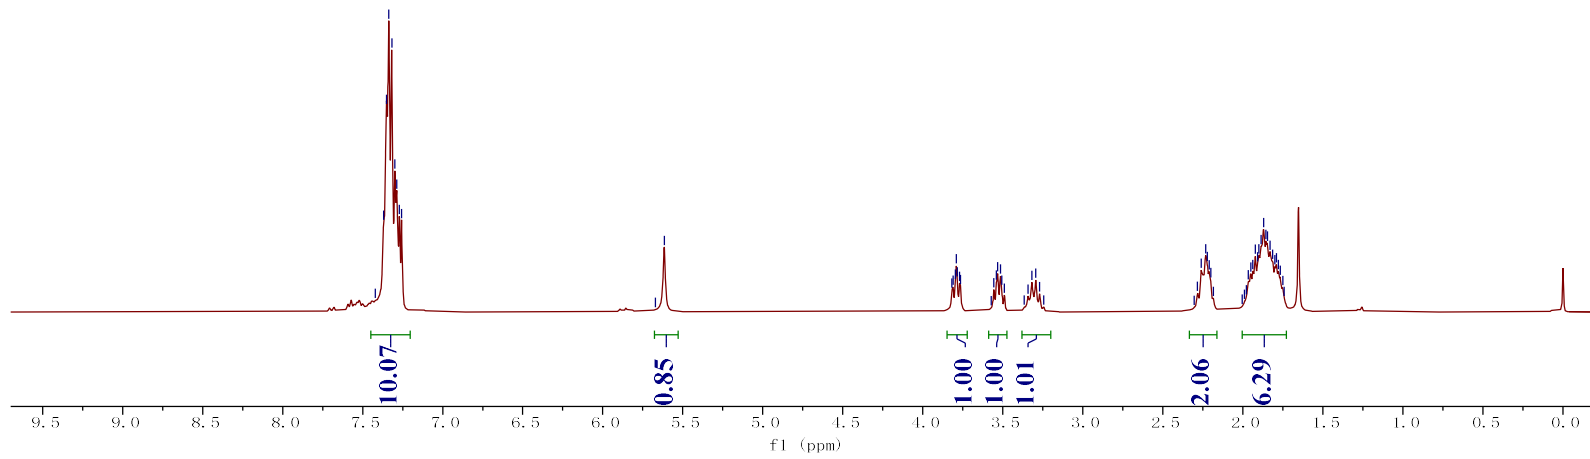

10xjm97ew-cf3, 11. fid

161.12  
151.24  
145.40  
145.02  
128.92  
128.44  
128.34  
127.95  
127.92  
126.42  
126.35  
126.15

79.17

52.65  
48.83  
48.57  
48.30  
48.04  
42.36  
39.39  
29.35  
25.97  
25.95  
22.88

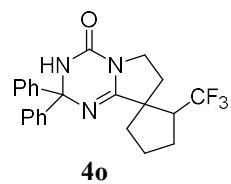

$^{13}\text{C}$  NMR (100 MHz,  $\text{CDCl}_3$ )

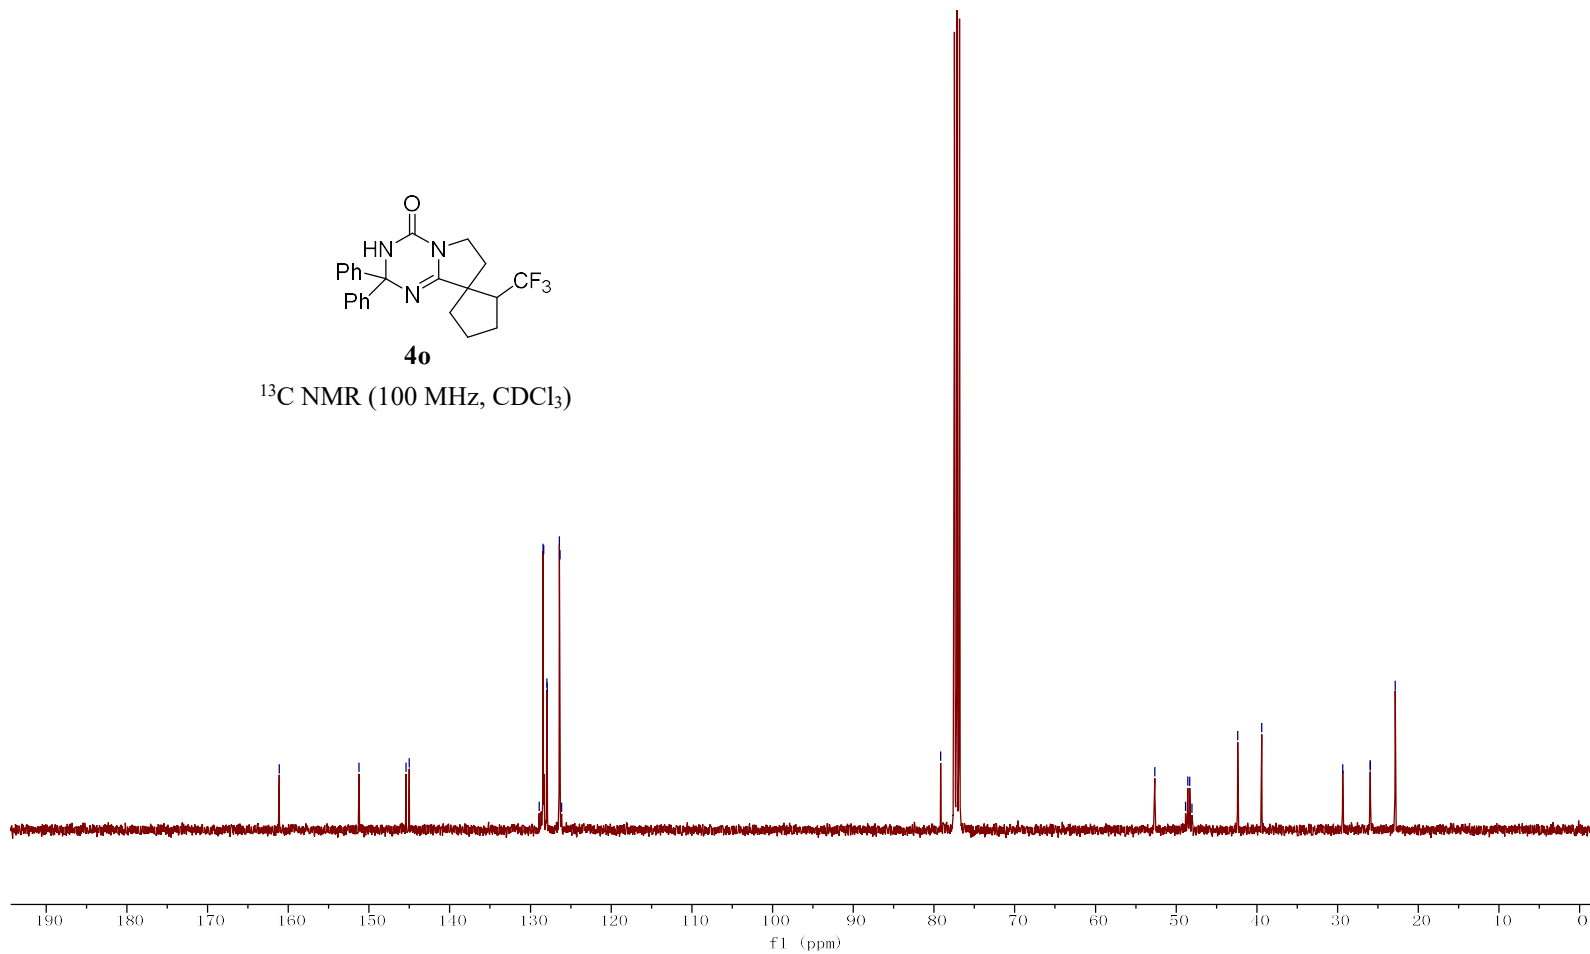

10x\_jm90-cf3-f-2.11.fid

-65.68  
-65.71

-65.68  
-65.71

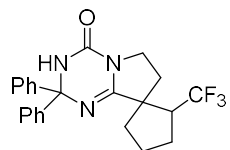

**4o**

<sup>19</sup>F NMR (376 MHz, CDCl<sub>3</sub>)

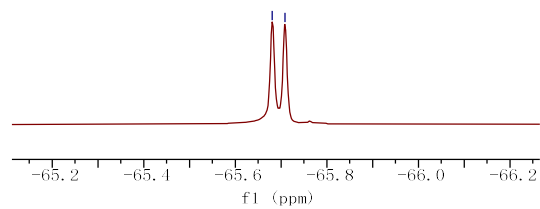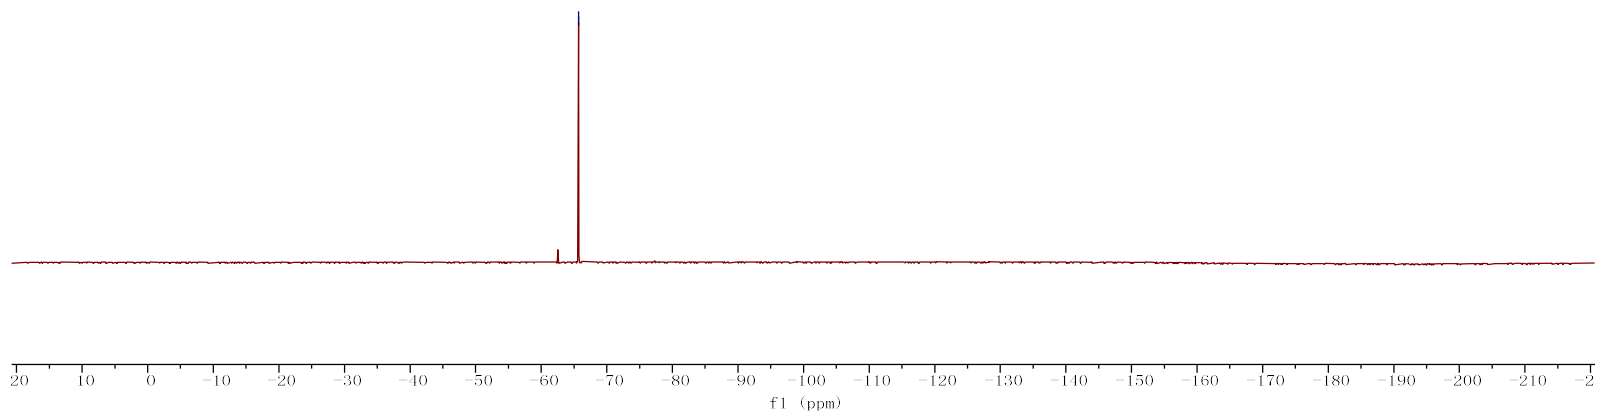

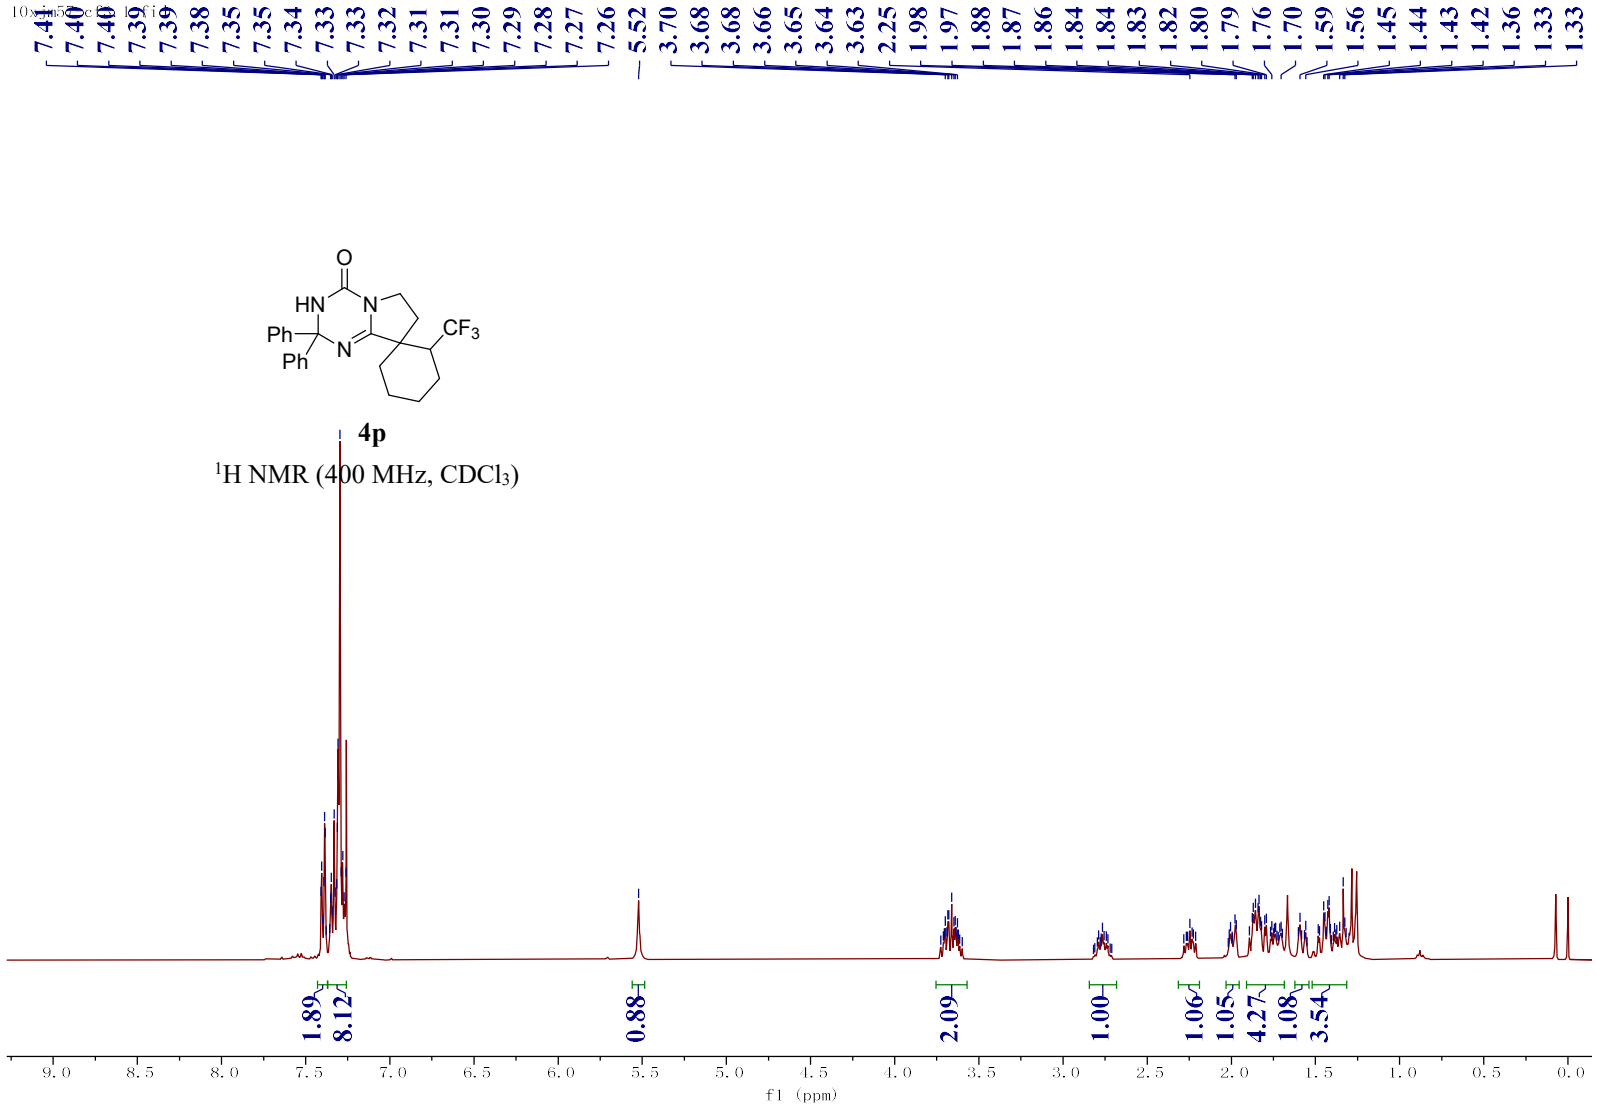

10xjm57-ef3.12.fid

161.80  
151.31  
145.48  
145.04  
131.48  
128.72  
128.34  
128.28  
127.91  
127.87  
126.70  
126.45  
125.92

79.29

46.82  
46.58  
46.33  
46.09  
42.32  
37.76  
25.80  
24.39  
22.84  
22.81  
22.78  
21.76

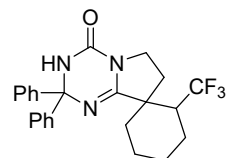

**4p**

<sup>13</sup>C NMR (100 MHz, CDCl<sub>3</sub>)

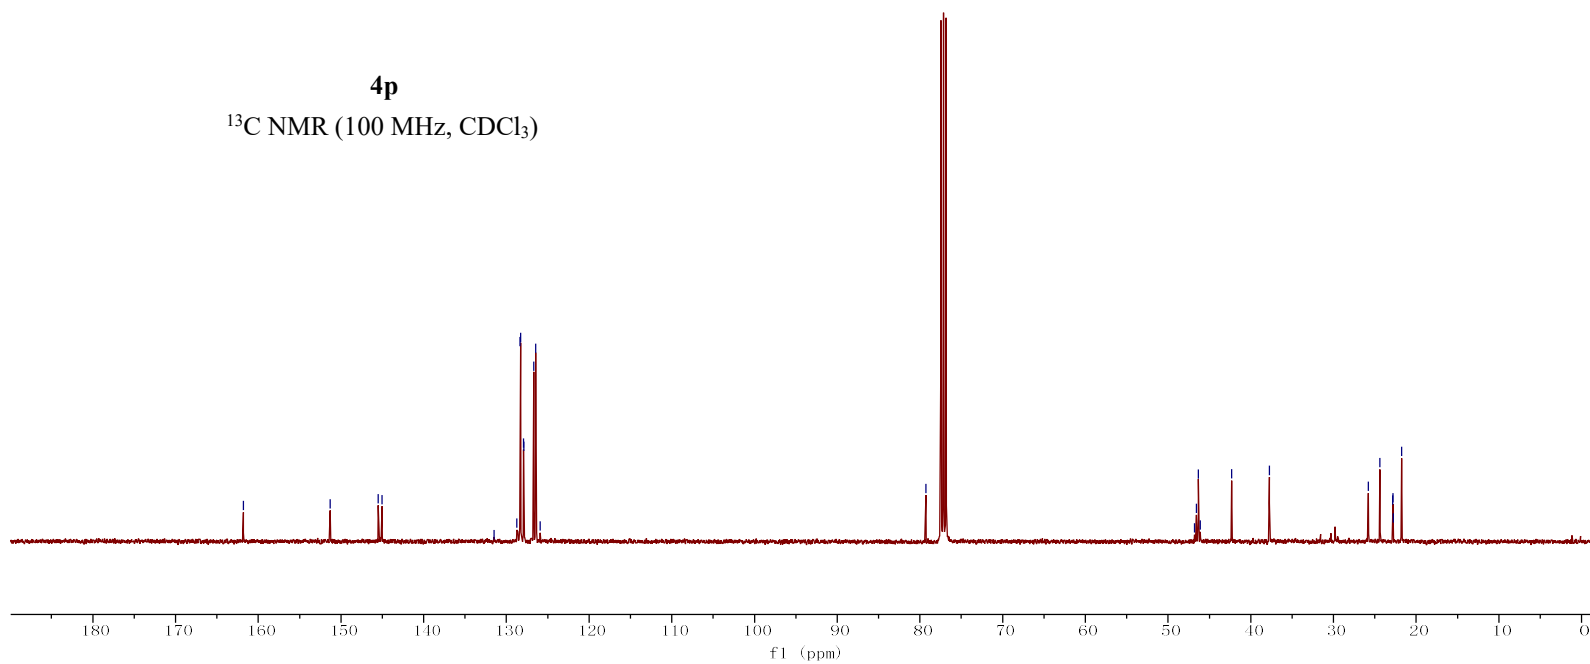

10XJM57D2-CJJ, 11. fid

-66.68  
-66.70

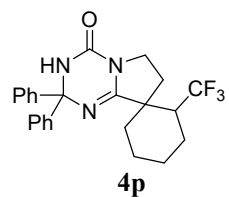

<sup>19</sup>F NMR (376 MHz, CDCl<sub>3</sub>)

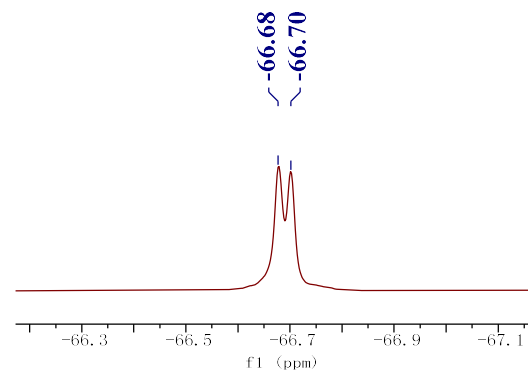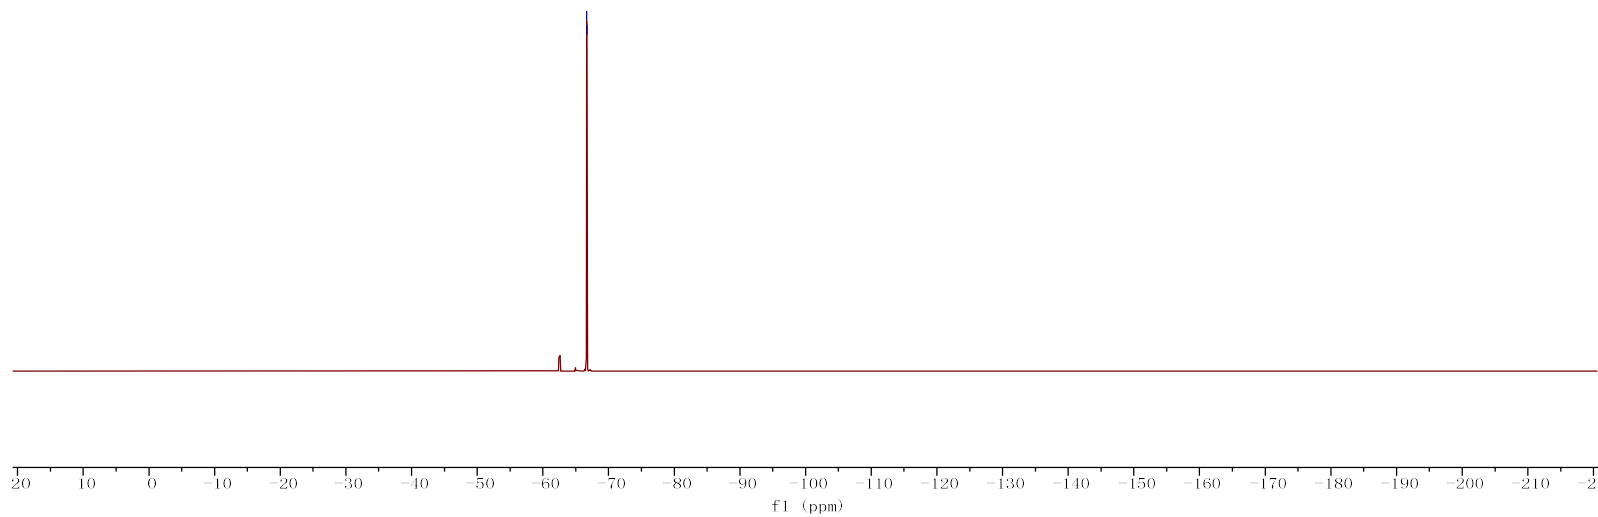



7.43  
7.42  
7.42  
7.41  
7.41  
7.40  
7.40  
7.37  
7.37  
7.36  
7.36  
7.35  
7.35  
7.34  
7.34  
7.33  
7.33  
7.32  
7.31  
7.31  
7.31  
7.30  
7.30  
7.27  
7.27  
7.26  
7.23  
7.22  
7.22  
7.21  
7.21  
7.20  
6.88  
6.87  
6.87  
6.86  
6.86  
6.85  
6.85  
6.85  
6.84  
5.46  
3.01  
3.01  
2.99  
2.98  
2.69  
2.62  
2.31  
2.30

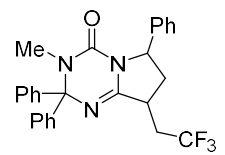

**4q**

<sup>1</sup>H NMR (500 MHz, CDCl<sub>3</sub>)

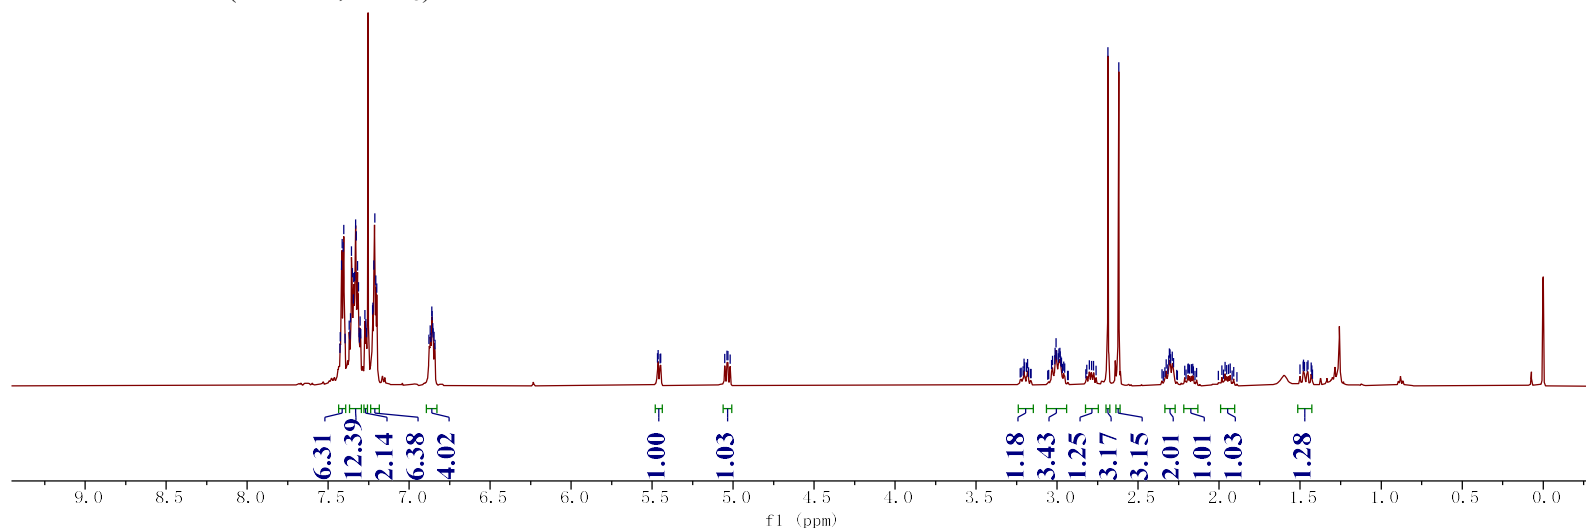

159.12  
157.89  
152.23  
151.35  
143.18  
142.94  
142.55  
142.31  
141.55  
140.94  
129.25  
128.82  
128.80  
128.47  
128.36  
128.17  
128.15  
127.75  
127.64  
127.58  
127.18  
125.52  
125.12  
84.09  
83.38

60.35  
58.52  
38.44  
37.40  
36.30  
36.07  
35.84  
35.67  
35.41  
35.18  
34.90  
32.02  
31.92

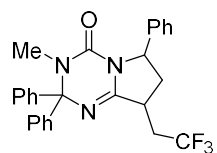

**4q**

$^{13}\text{C}$  NMR (125 MHz,  $\text{CDCl}_3$ )

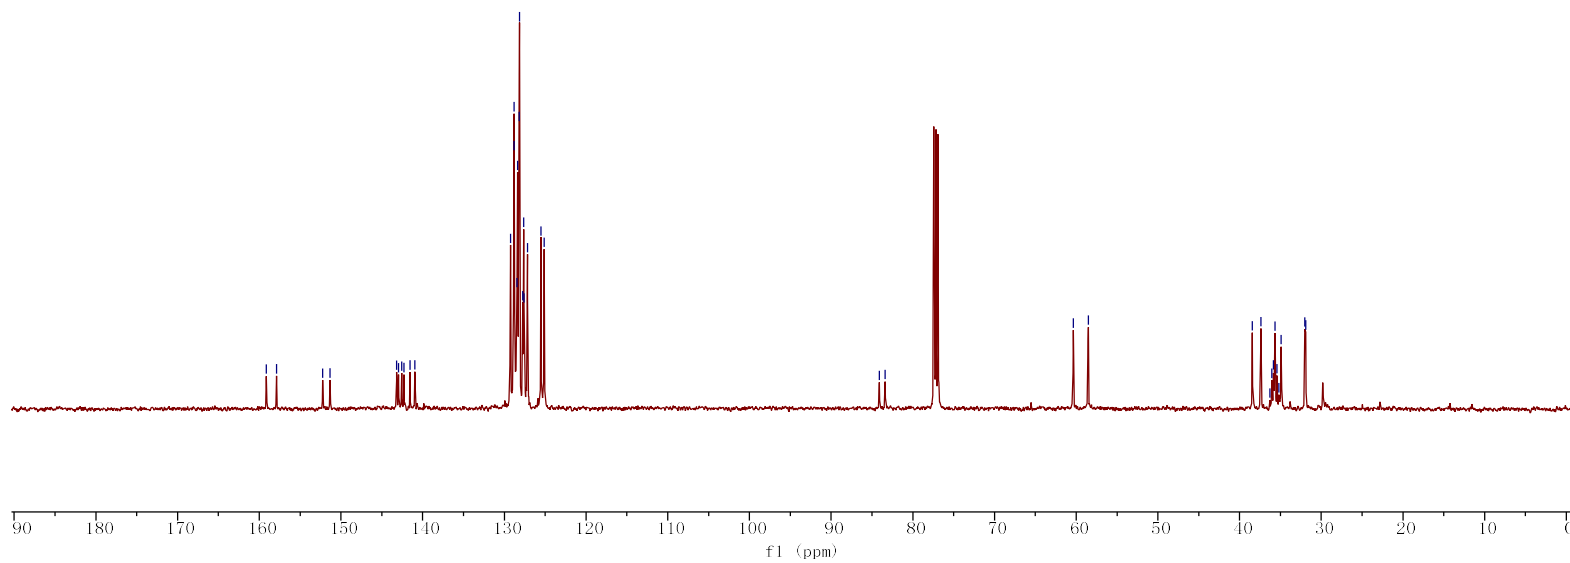

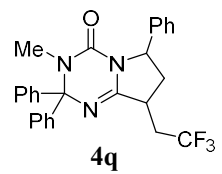

<sup>19</sup>F NMR (470 MHz, CDCl<sub>3</sub>)

-64.55  
-64.57  
-64.60  
-64.73  
-64.76  
-64.78

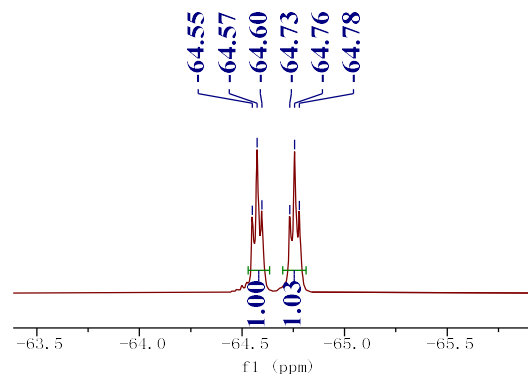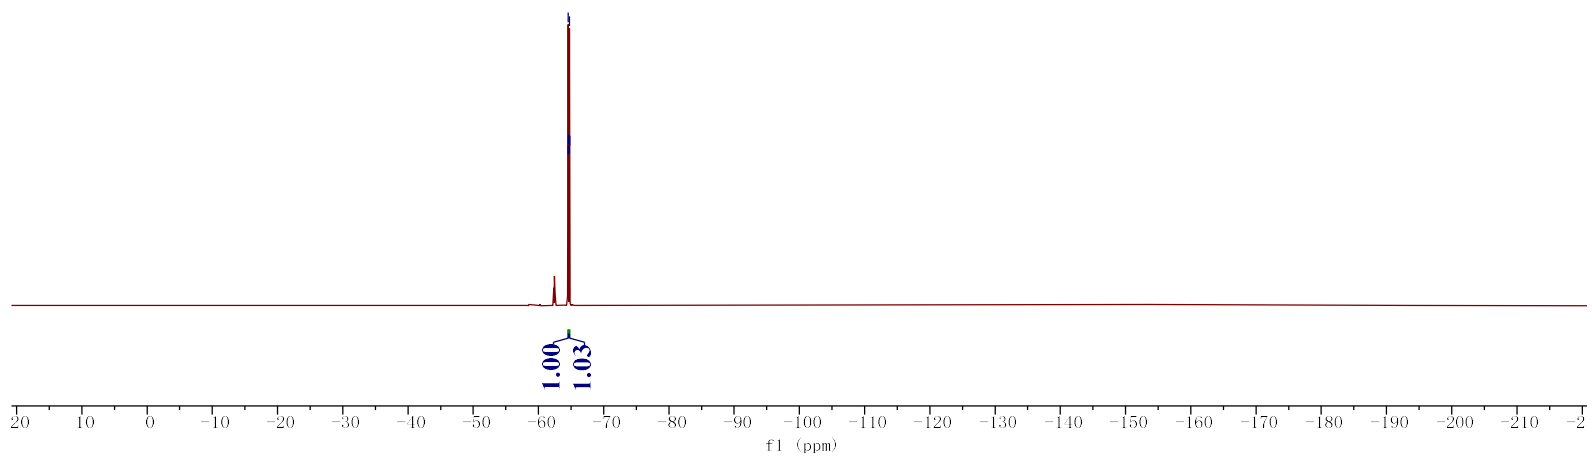

7.40  
7.40  
7.39  
7.39  
7.38  
7.38  
7.33  
7.33  
7.33  
7.32  
7.31  
7.30  
7.30  
7.29  
7.29  
7.28  
7.28  
7.27  
7.27  
7.26  
7.26  
7.25  
7.25  
7.24  
7.24  
7.23  
6.02  
3.54  
3.52  
3.27  
3.25  
2.94  
2.92  
2.91  
2.90  
2.89  
2.88  
2.76  
2.76  
2.75  
2.74  
2.20  
2.18  
2.17  
2.16  
2.16  
2.15  
2.14  
1.20  
0.74

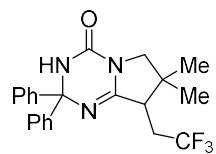

**4r**

<sup>1</sup>H NMR (500 MHz, CDCl<sub>3</sub>)

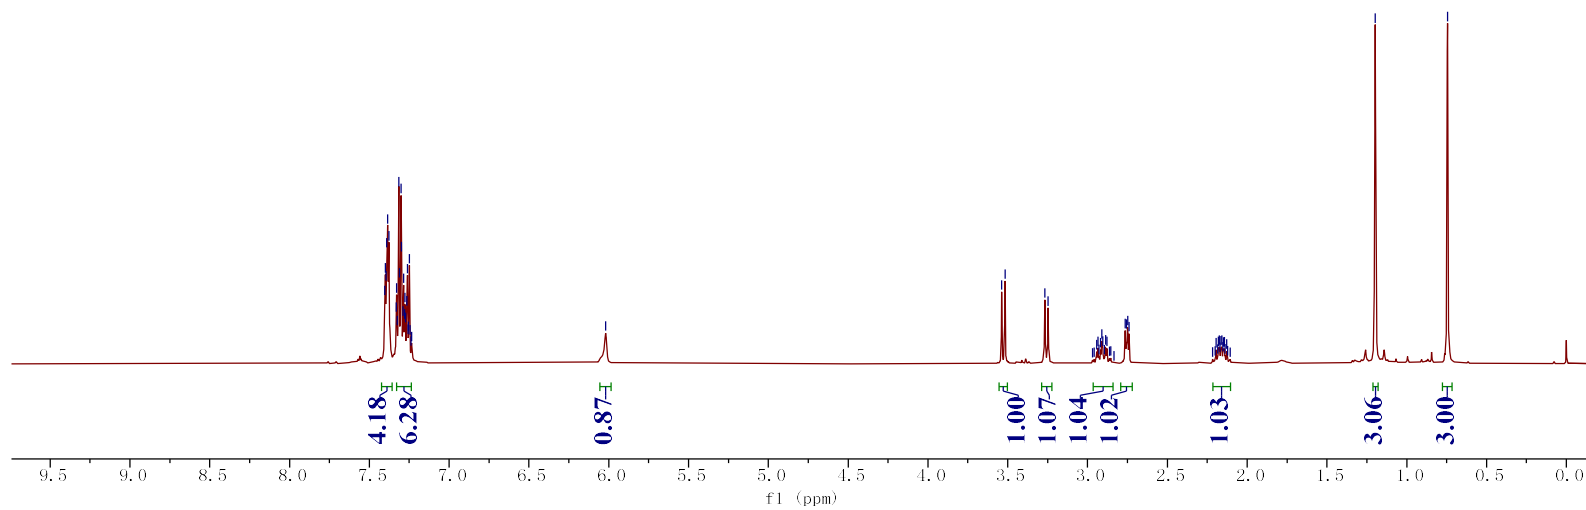

11xjm69ew.16.fid

157.68  
151.41  
145.45  
145.16  
128.47  
128.32  
127.94  
127.78  
126.41  
126.05  
125.74  
79.09  
56.29  
46.42  
38.56  
30.56  
30.33  
30.09  
29.85  
24.29  
21.24

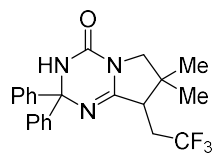

**4r**

$^{13}\text{C}$  NMR (125 MHz,  $\text{CDCl}_3$ )

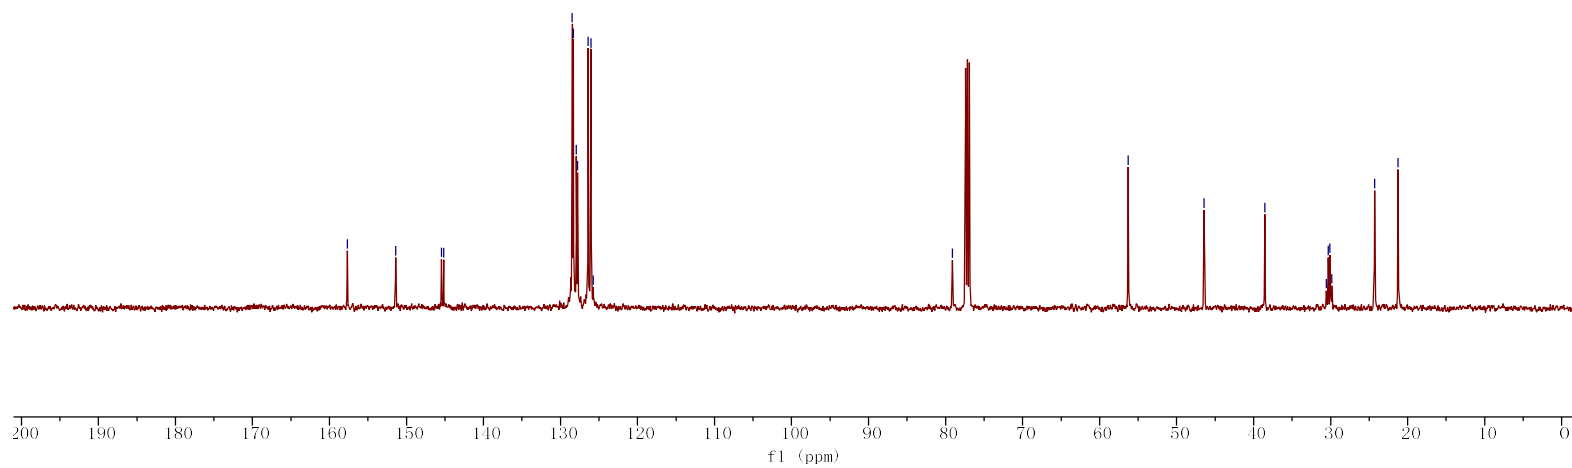

11xjm69ew.15.fid

-63.69  
-63.72  
-63.74

-63.69  
-63.72  
-63.74

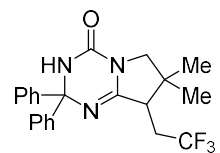

4r

<sup>19</sup>F NMR (470 MHz, CDCl<sub>3</sub>)

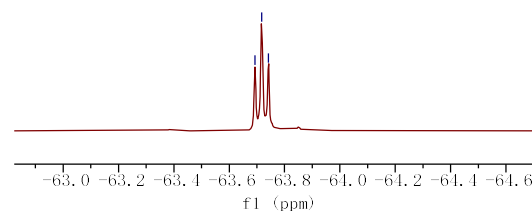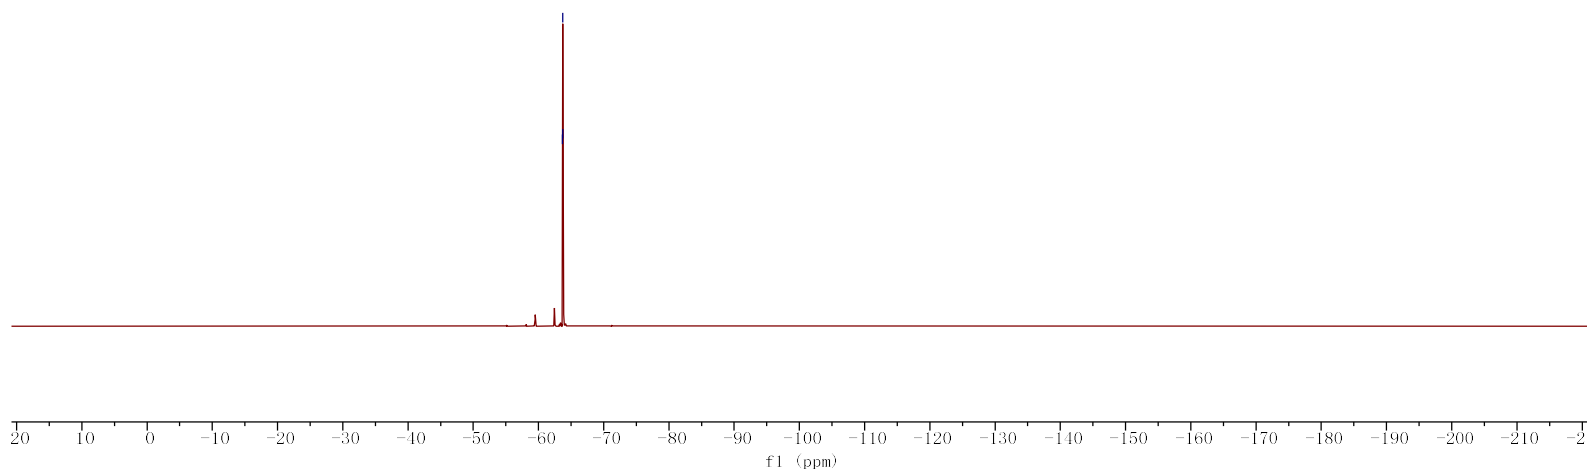

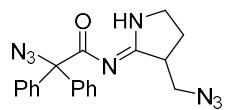

**6a**

<sup>1</sup>H NMR (500 MHz, CDCl<sub>3</sub>)

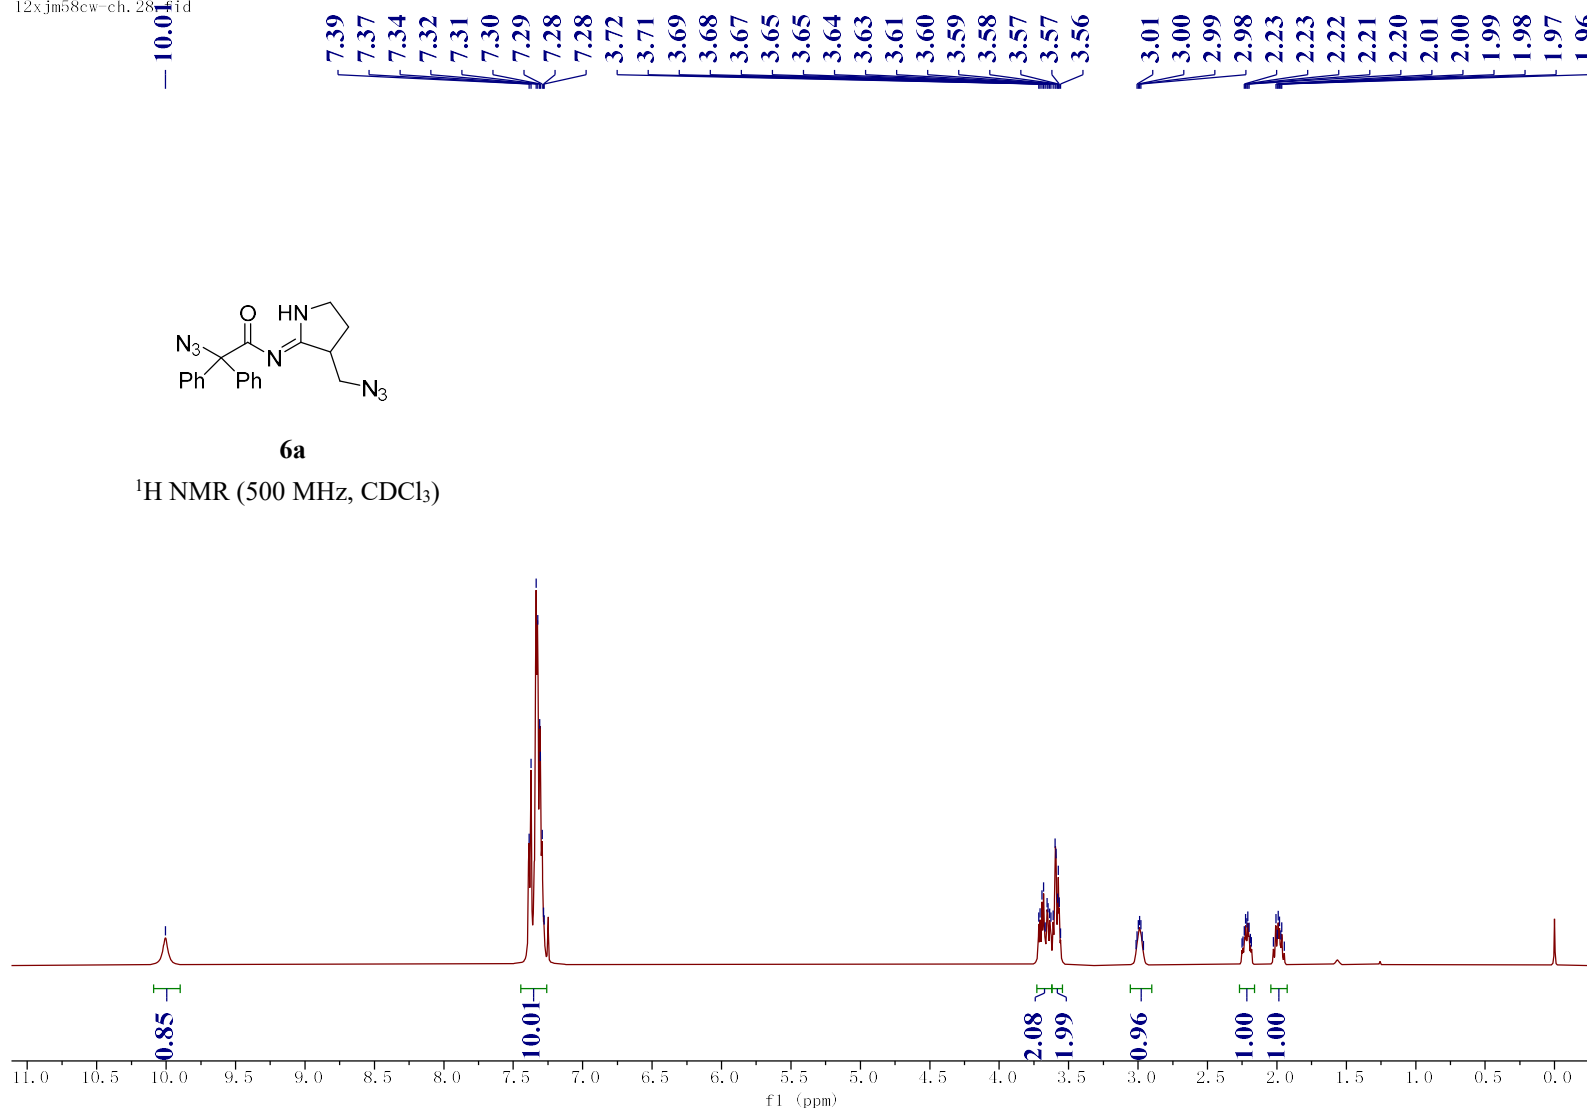

12xjm58ew-ch. 23 fid

— 184.94

— 174.76

— 140.89

— 140.77

— 128.57

— 128.56

— 128.11

— 128.02

— 127.92

— 78.80

— 51.98

— 45.81

— 44.89

— 23.34

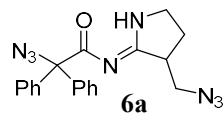

<sup>13</sup>C NMR (125 MHz, CDCl<sub>3</sub>)

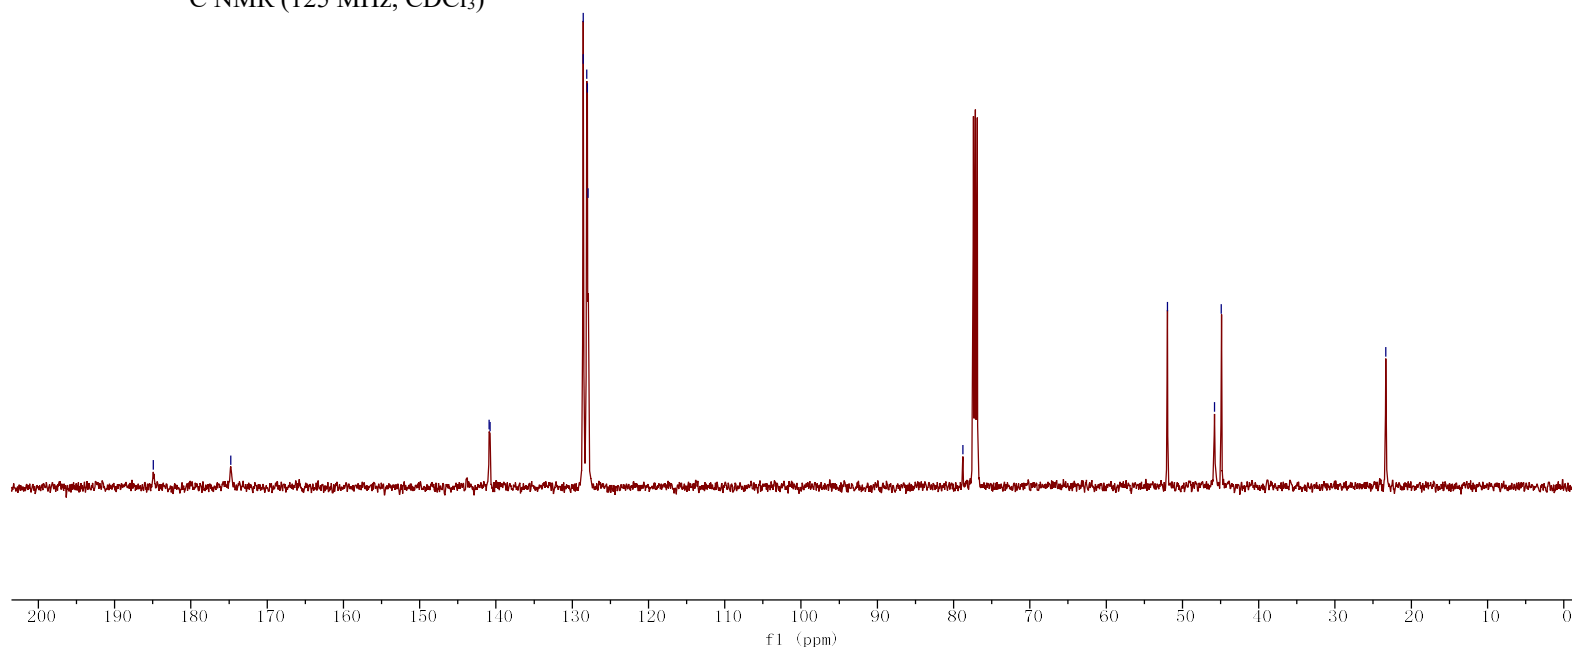



12  
 9.89  
 7.38  
 7.38  
 7.37  
 7.37  
 7.36  
 7.36  
 7.36  
 7.35  
 7.35  
 7.34  
 7.34  
 7.34  
 7.34  
 7.33  
 7.33  
 7.32  
 7.32  
 7.32  
 7.31  
 7.30  
 7.29  
 7.29  
 7.28  
 7.27  
 7.26  
 3.64  
 3.64  
 3.62  
 3.61  
 3.60  
 3.58  
 3.58  
 3.26  
 3.23  
 2.26  
 2.24  
 2.23  
 2.22  
 2.22  
 2.21  
 2.20  
 2.18  
 1.84  
 1.83  
 1.82  
 1.81  
 1.80  
 1.79  
 1.78  
 1.15

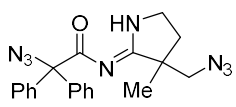

**6b**

<sup>1</sup>H NMR (400 MHz, CDCl<sub>3</sub>)

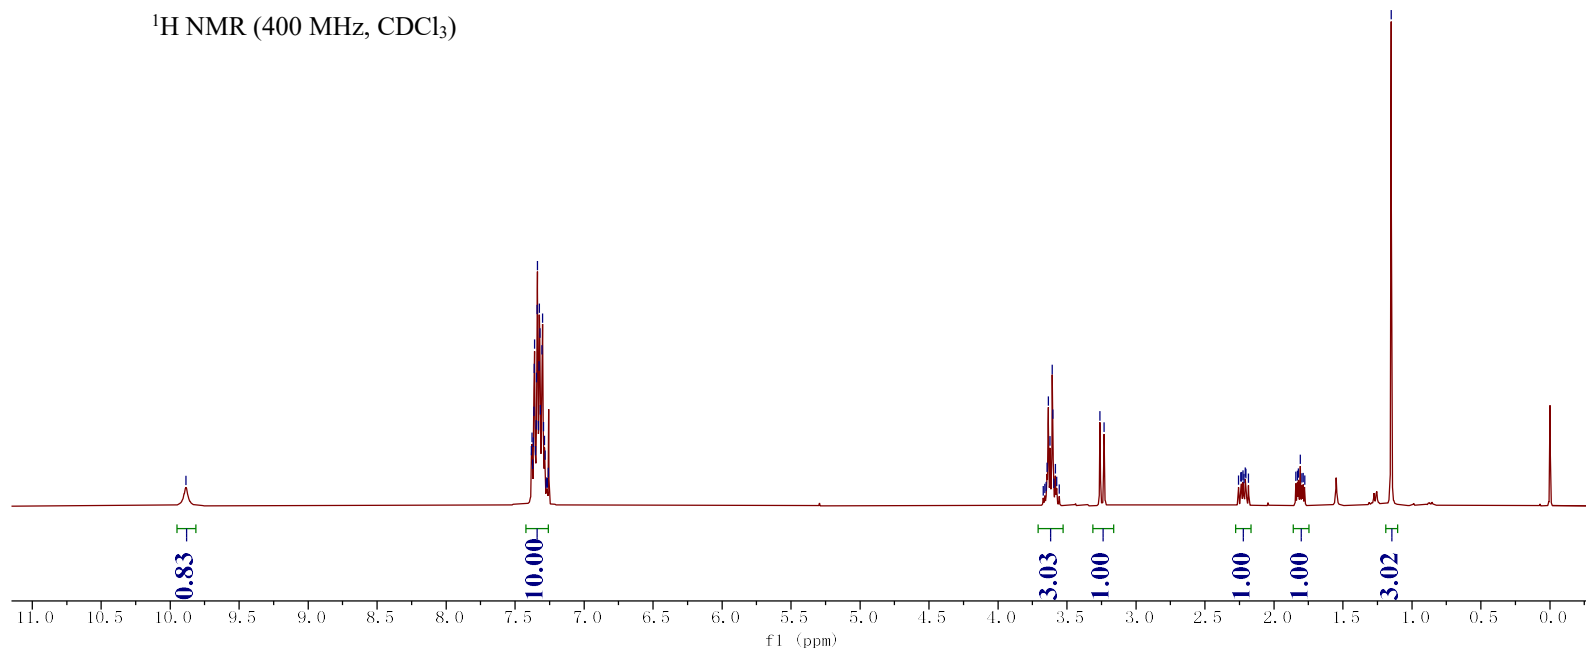

12xjm38ew.18.fid

— 185.44  
— 177.80

— 141.06  
— 140.96  
— 128.60  
— 128.57  
— 128.00  
— 127.82

— 78.88

— 58.05

— 48.74

— 44.43

— 30.07

— 22.27

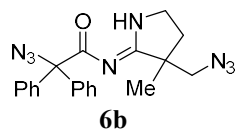

<sup>13</sup>C NMR (125 MHz, CDCl<sub>3</sub>)

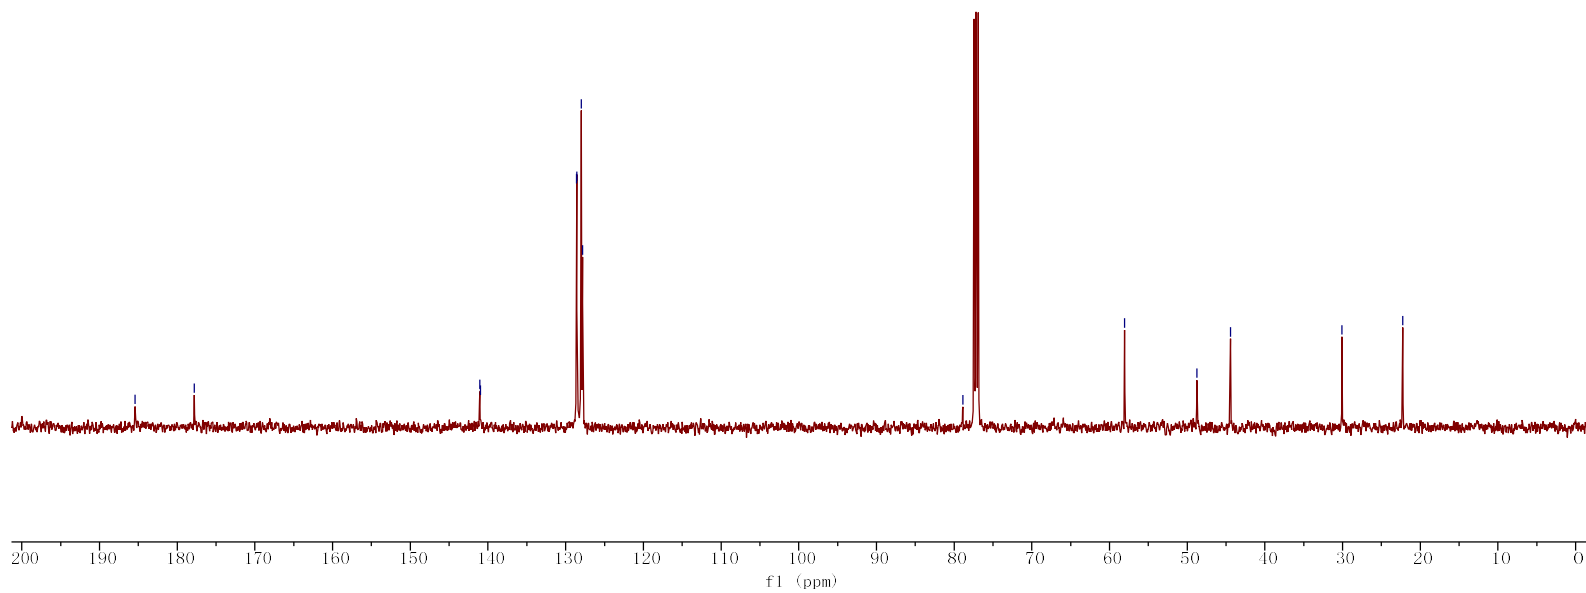

12xjm92cw.142.fid

7.42 7.42 7.42 7.41 7.41 7.40 7.38 7.37 7.37 7.36 7.35 7.35 7.34 7.34 7.33 7.33 7.32 7.32 7.32 7.31 7.31 7.30 7.28 7.28 7.28 7.27 7.27 7.26 7.26 7.25 7.24 7.24 7.24 7.23 7.22 7.21 3.91 3.89 3.64 3.64 3.57 3.55 3.52 3.52 2.55 2.53 2.51 2.51 2.50 2.50

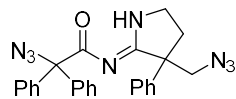

**6c**

<sup>1</sup>H NMR (500 MHz, CDCl<sub>3</sub>)

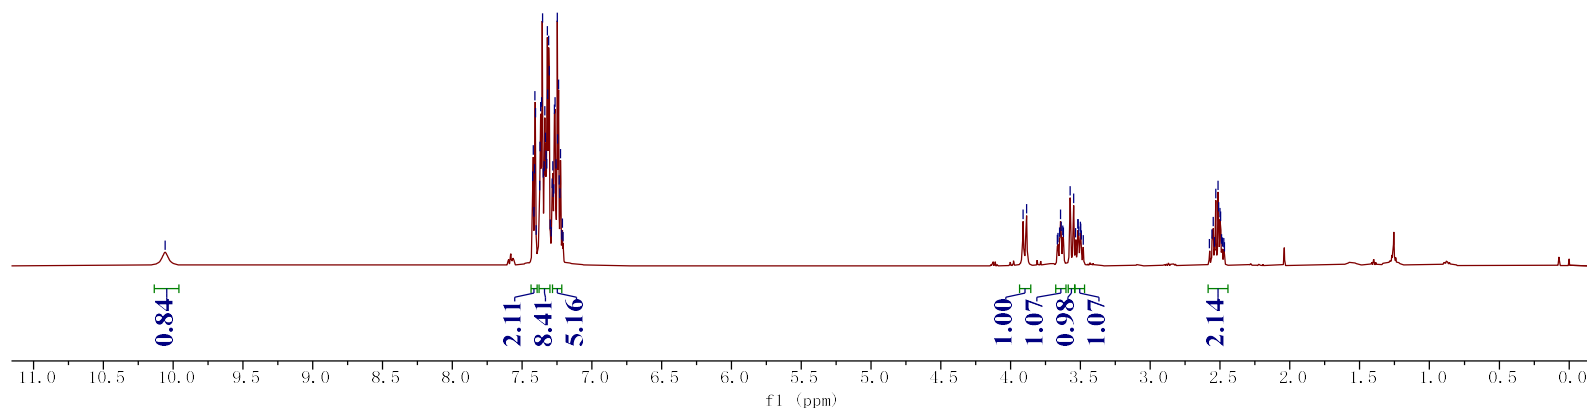

12xjm92ew-c. fid

— 184.95  
— 175.52

— 140.83  
— 140.55  
— 138.26  
— 128.86  
— 128.75  
— 128.16  
— 128.06  
— 127.99  
— 127.80  
— 126.67

— 79.17

— 57.92  
— 55.96

— 44.25

— 30.01

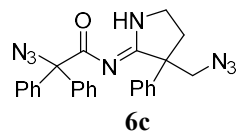

<sup>13</sup>C NMR (125 MHz, CDCl<sub>3</sub>)

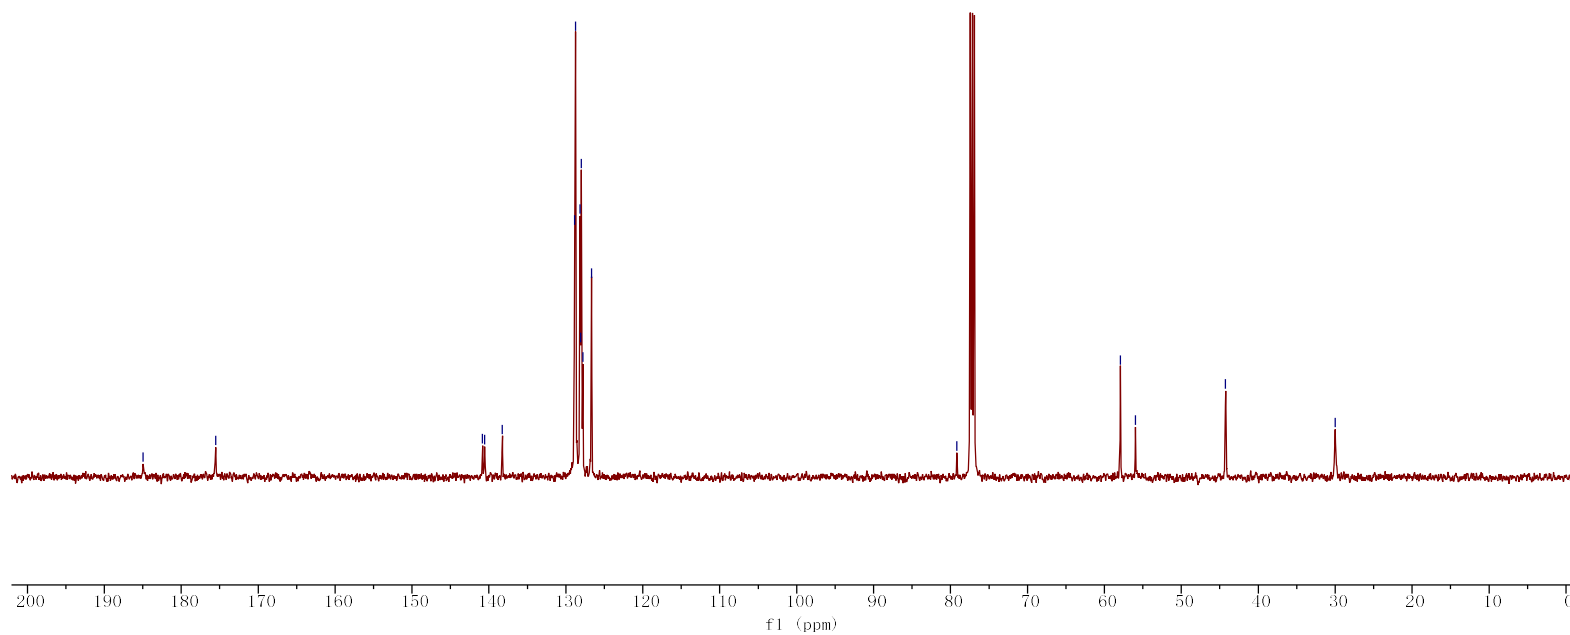

7.38, 7.38, 7.38, 7.37, 7.37, 7.36, 7.36, 7.35, 7.35, 7.35, 7.34, 7.34, 7.34, 7.33, 7.33, 7.32, 7.31, 7.31, 7.30, 7.29, 7.29, 4.12, 4.10, 4.10, 4.08, 3.65, 3.64, 3.58, 3.57, 2.34, 2.33, 2.13, 2.12, 1.98, 1.95, 1.75, 1.74, 1.74, 1.73, 1.73, 1.72, 1.71, 1.71, 1.70, 1.66, 1.65, 1.64, 1.63, 1.61, 1.60, 1.59

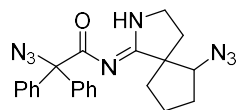

**6d**

<sup>1</sup>H NMR (500 MHz, CDCl<sub>3</sub>)

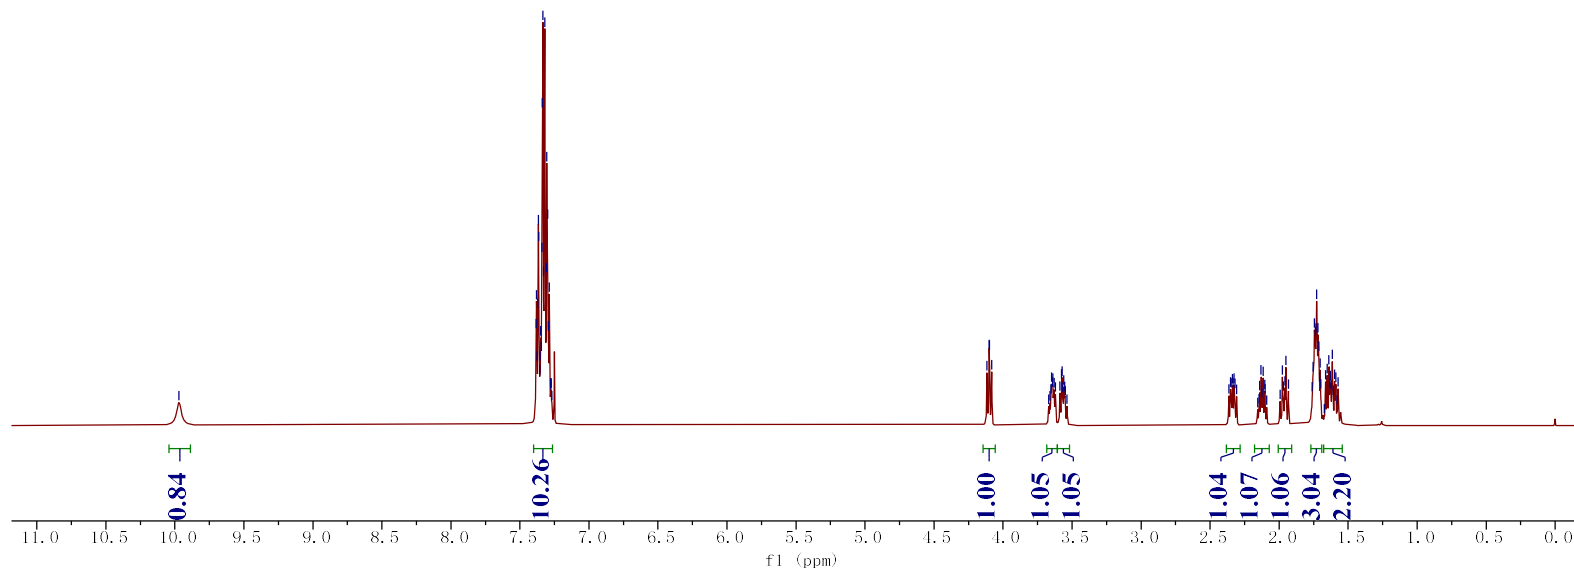

12xjm91ew-c.1.fid

— 185.22  
— 178.10

— 141.09  
— 140.95  
— 128.58  
— 128.56  
— 127.98  
— 127.79

— 78.96

— 67.60

— 57.78

— 44.82

— 35.54  
— 30.09  
— 27.77  
— 20.83

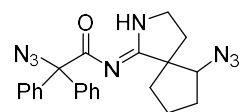

**6d**

<sup>13</sup>C NMR (125 MHz, CDCl<sub>3</sub>)

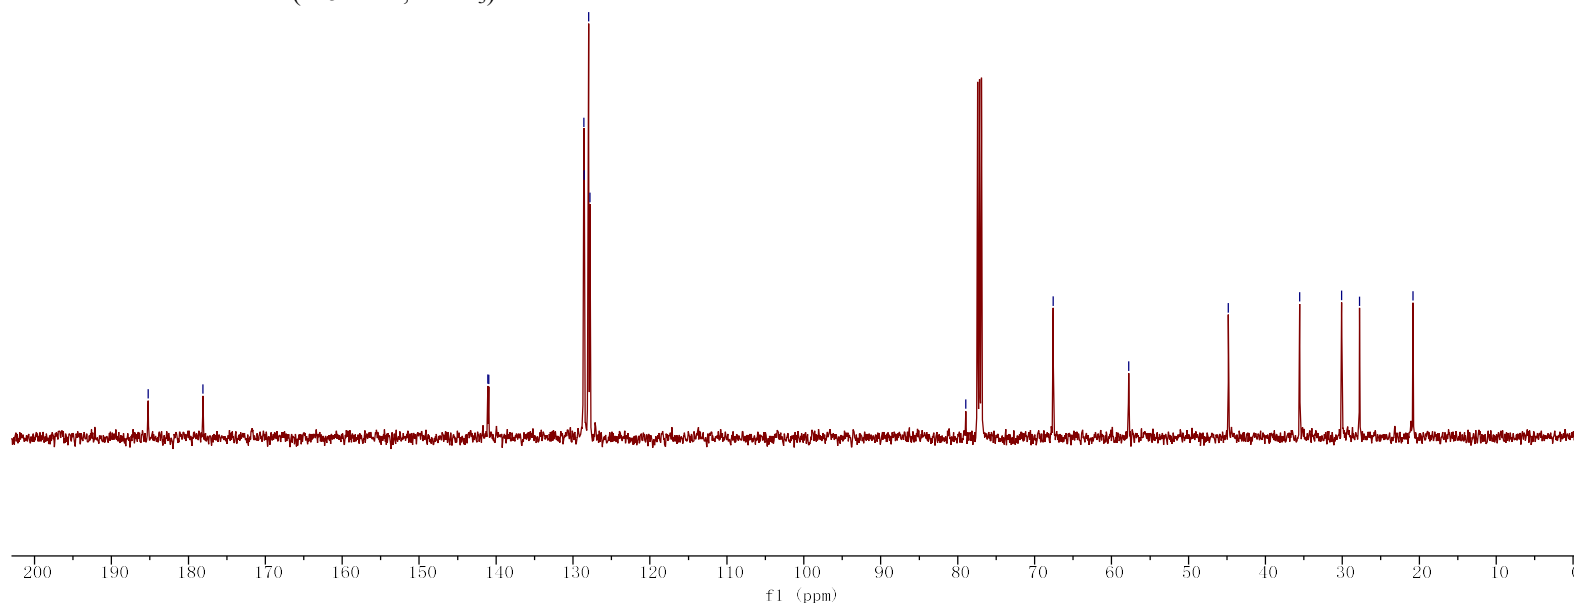

12x18  
 9.97, 7.40, 7.39, 7.35, 7.38, 7.38, 7.37, 7.37, 7.36, 7.34, 7.32, 7.32, 7.31, 7.31, 7.30, 7.29, 7.28, 7.27, 7.27, 3.81, 3.79, 3.78, 3.62, 3.61, 3.60, 3.59, 3.58, 3.56, 3.56, 3.54, 1.97, 1.96, 1.95, 1.82, 1.81, 1.79, 1.78, 1.77, 1.76, 1.64, 1.63, 1.62, 1.60, 1.51, 1.51, 1.35, 1.35, 1.33, 1.32, 1.30

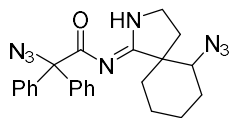

**6e**

<sup>1</sup>H NMR (400 MHz, CDCl<sub>3</sub>)

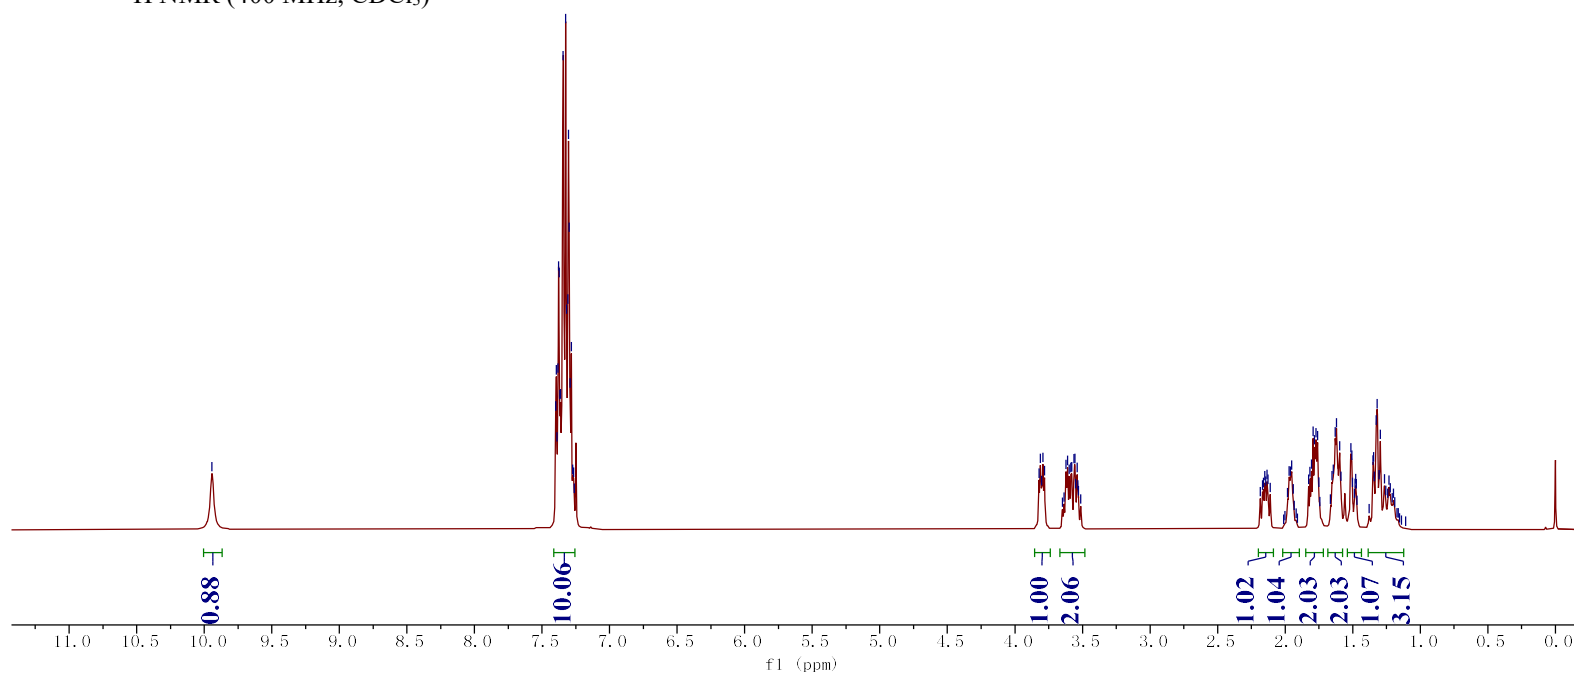

12x jm80ew-2.001.f1

185.36  
178.28

141.18  
141.05  
128.62  
128.57  
128.01  
127.96  
127.77  
127.74

78.87

64.27

53.30

44.89

33.61  
28.14  
24.70  
24.24  
21.30

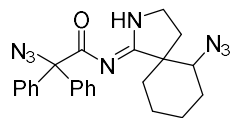

**6e**

<sup>13</sup>C NMR (100 MHz, CDCl<sub>3</sub>)

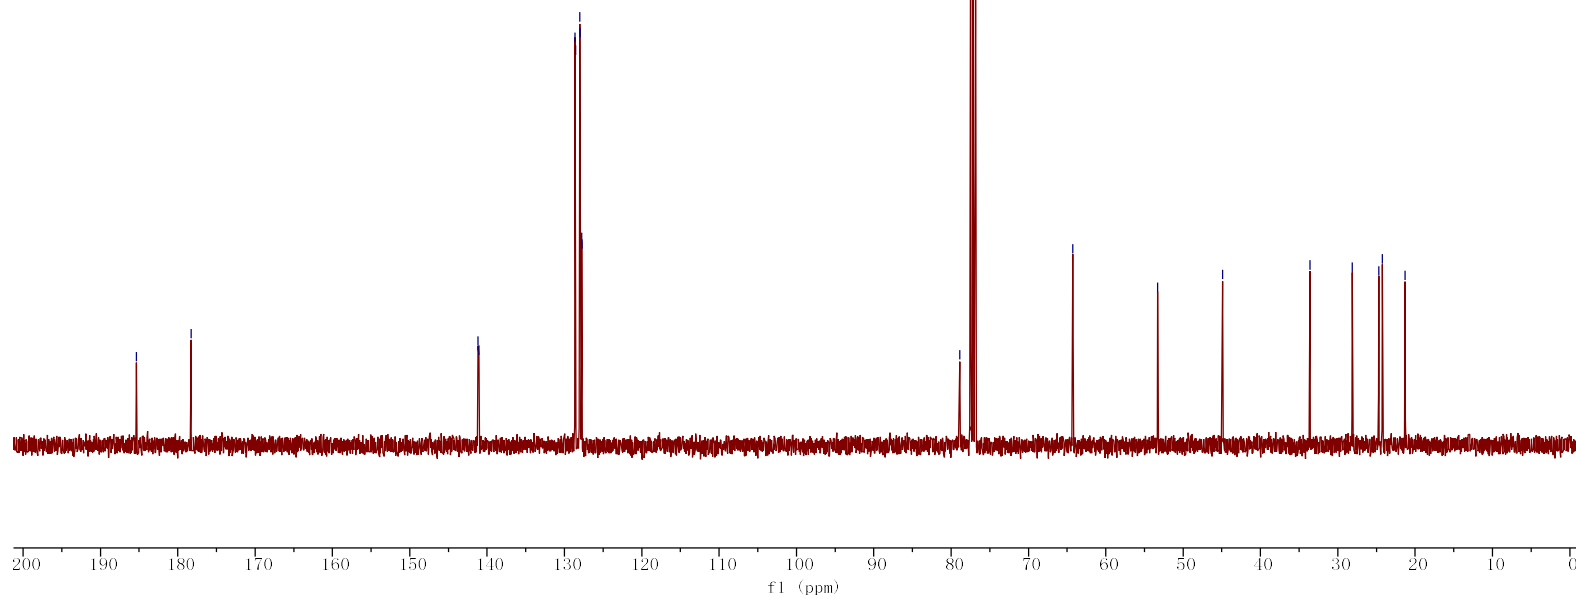



— 9.93

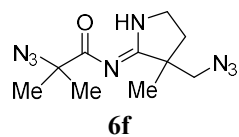<sup>1</sup>H NMR (500 MHz, CDCl<sub>3</sub>)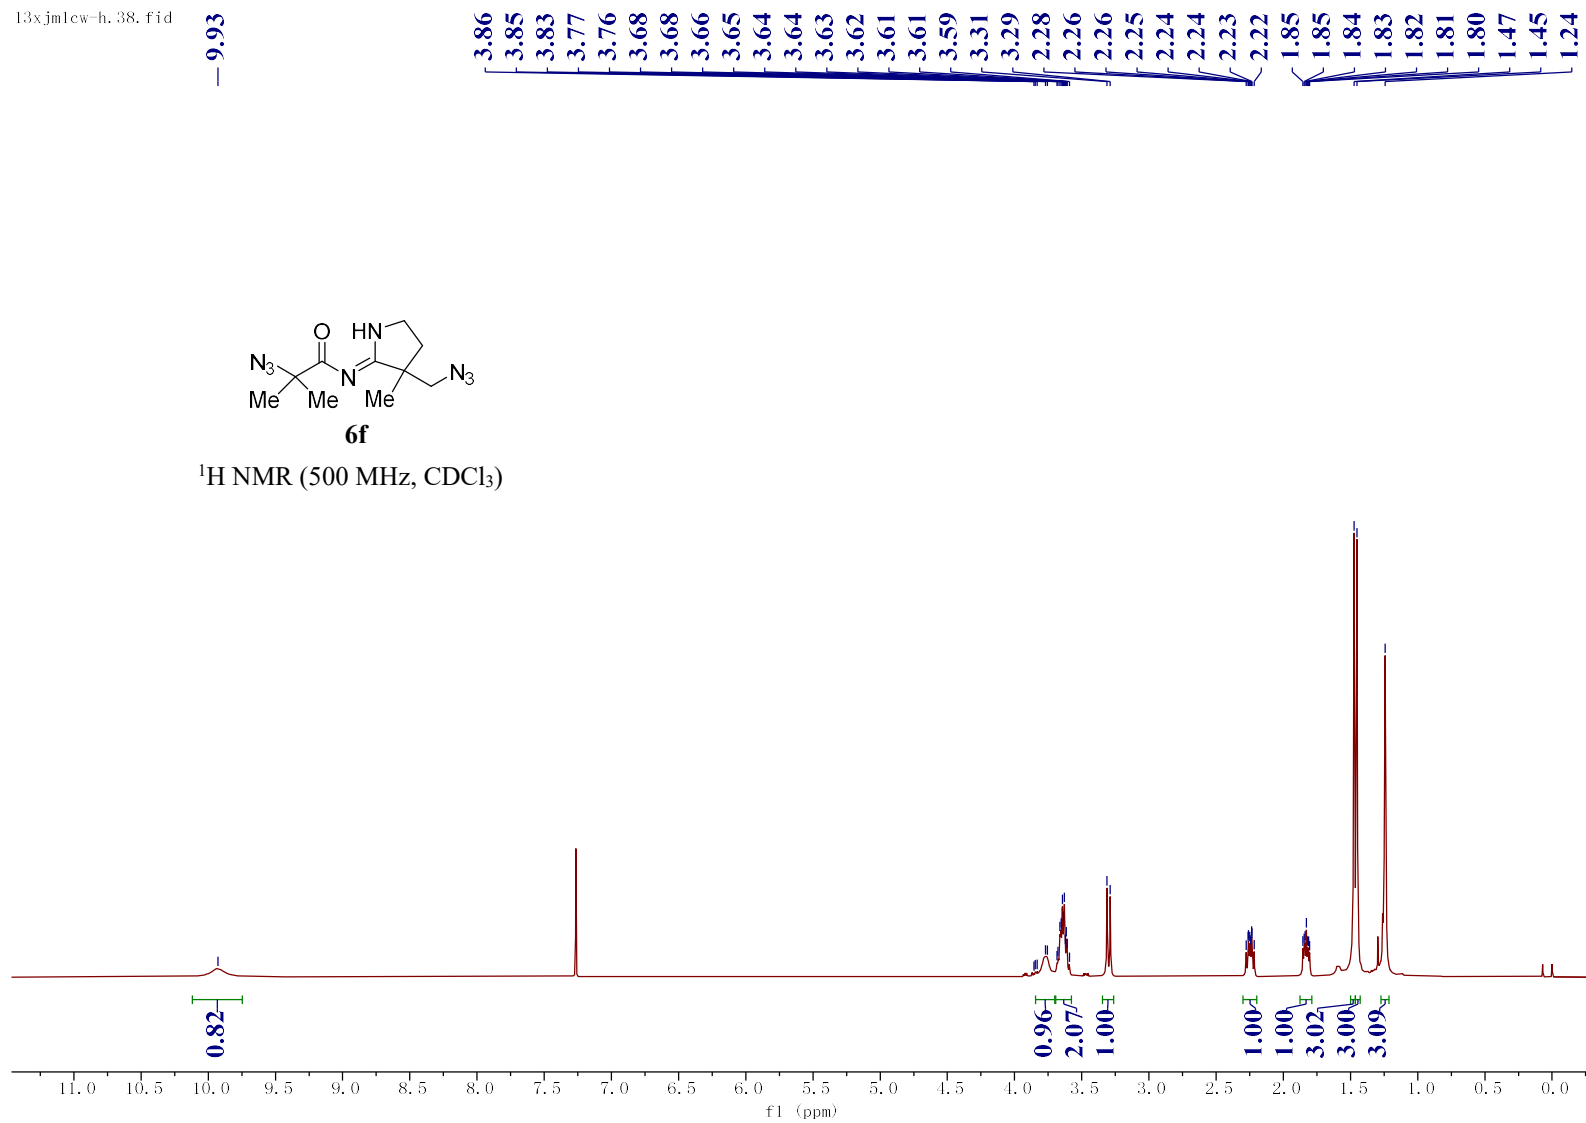

13xjmlw-c\_1.fid

— 188.35

— 177.77

— 65.87

— 57.94

— 48.76

— 44.19

✓ 30.12

✓ 24.91

✓ 24.83

✓ 22.29

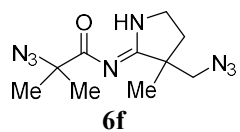

<sup>13</sup>C NMR (125 MHz, CDCl<sub>3</sub>)

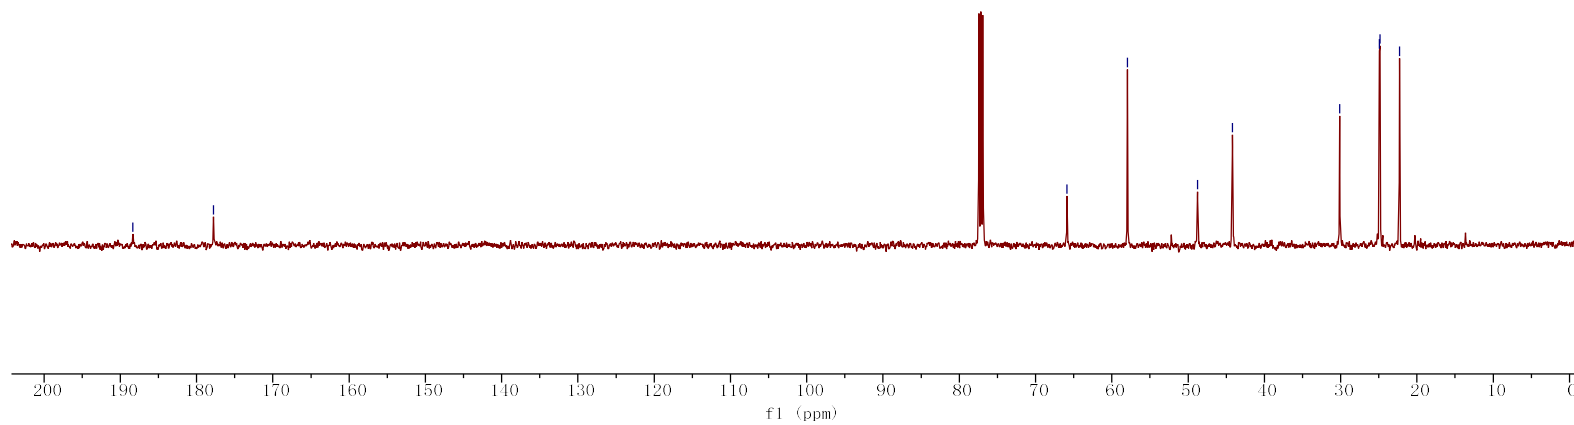

3.74  
3.67  
3.66  
3.62  
3.64  
3.63  
3.63  
3.62  
3.32  
3.29  
2.65  
2.64  
2.63  
2.63  
2.62  
2.62  
2.61  
2.60  
2.60  
2.28  
2.26  
2.26  
2.25  
2.25  
2.24  
2.23  
2.22  
2.22  
2.21  
2.21  
2.19  
2.18  
2.03  
2.02  
2.02  
2.01  
1.99  
1.99  
1.98  
1.97  
1.96  
1.95  
1.94  
1.94  
1.93  
1.86  
1.85  
1.84  
1.83  
1.24

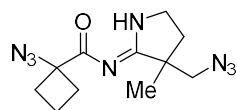

**6g**

<sup>1</sup>H NMR (500 MHz, CDCl<sub>3</sub>)

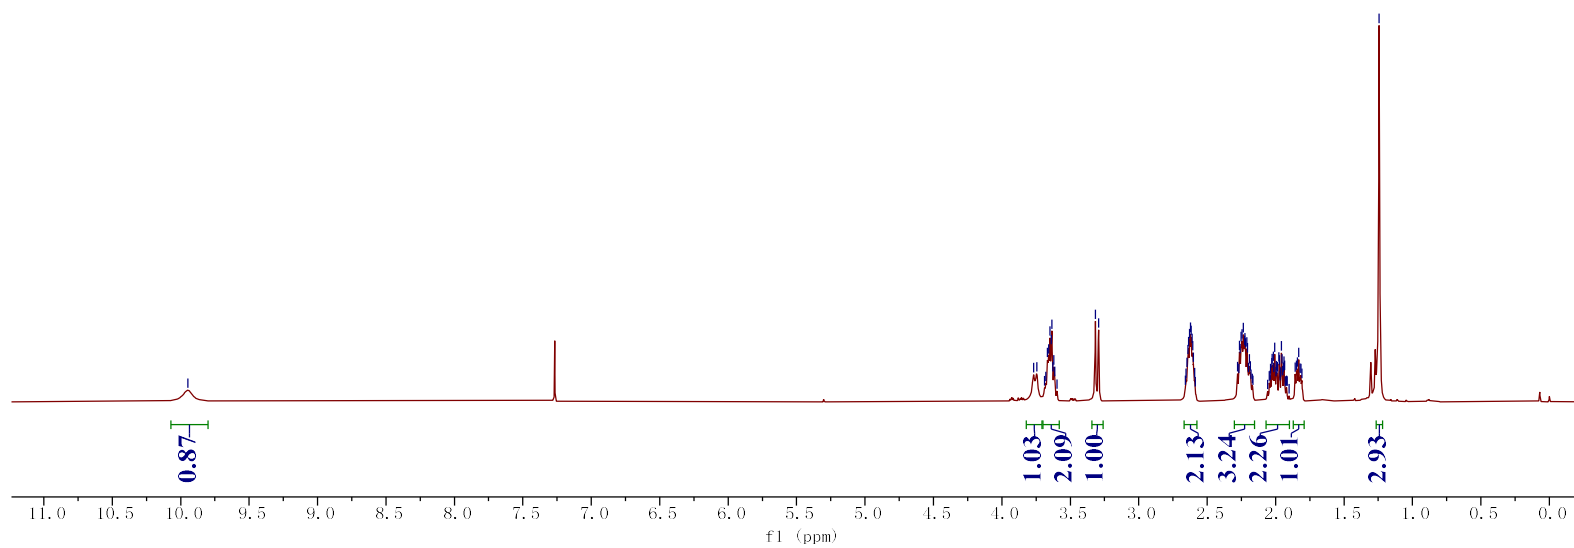

13xjm8cw-3, 100071, fid

- 177.62

- 68.11

- 57.88

- 48.85

- 44.32

31.49

31.17

30.23

22.27

- 14.68

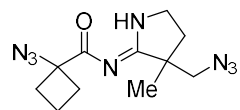

**6g**

<sup>13</sup>C NMR (125 MHz, CDCl<sub>3</sub>)

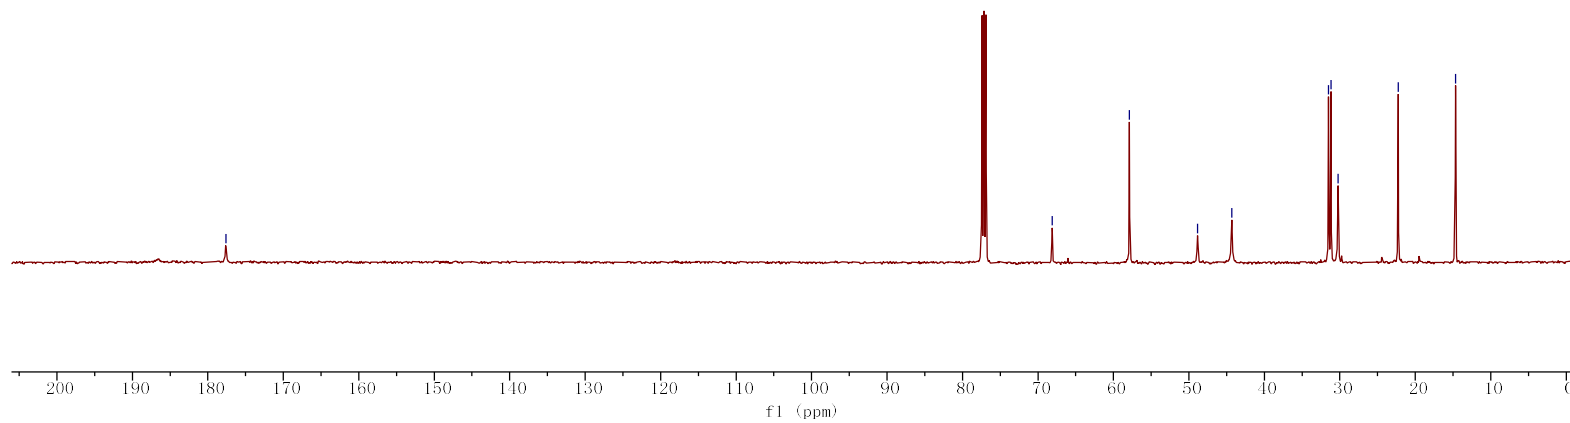

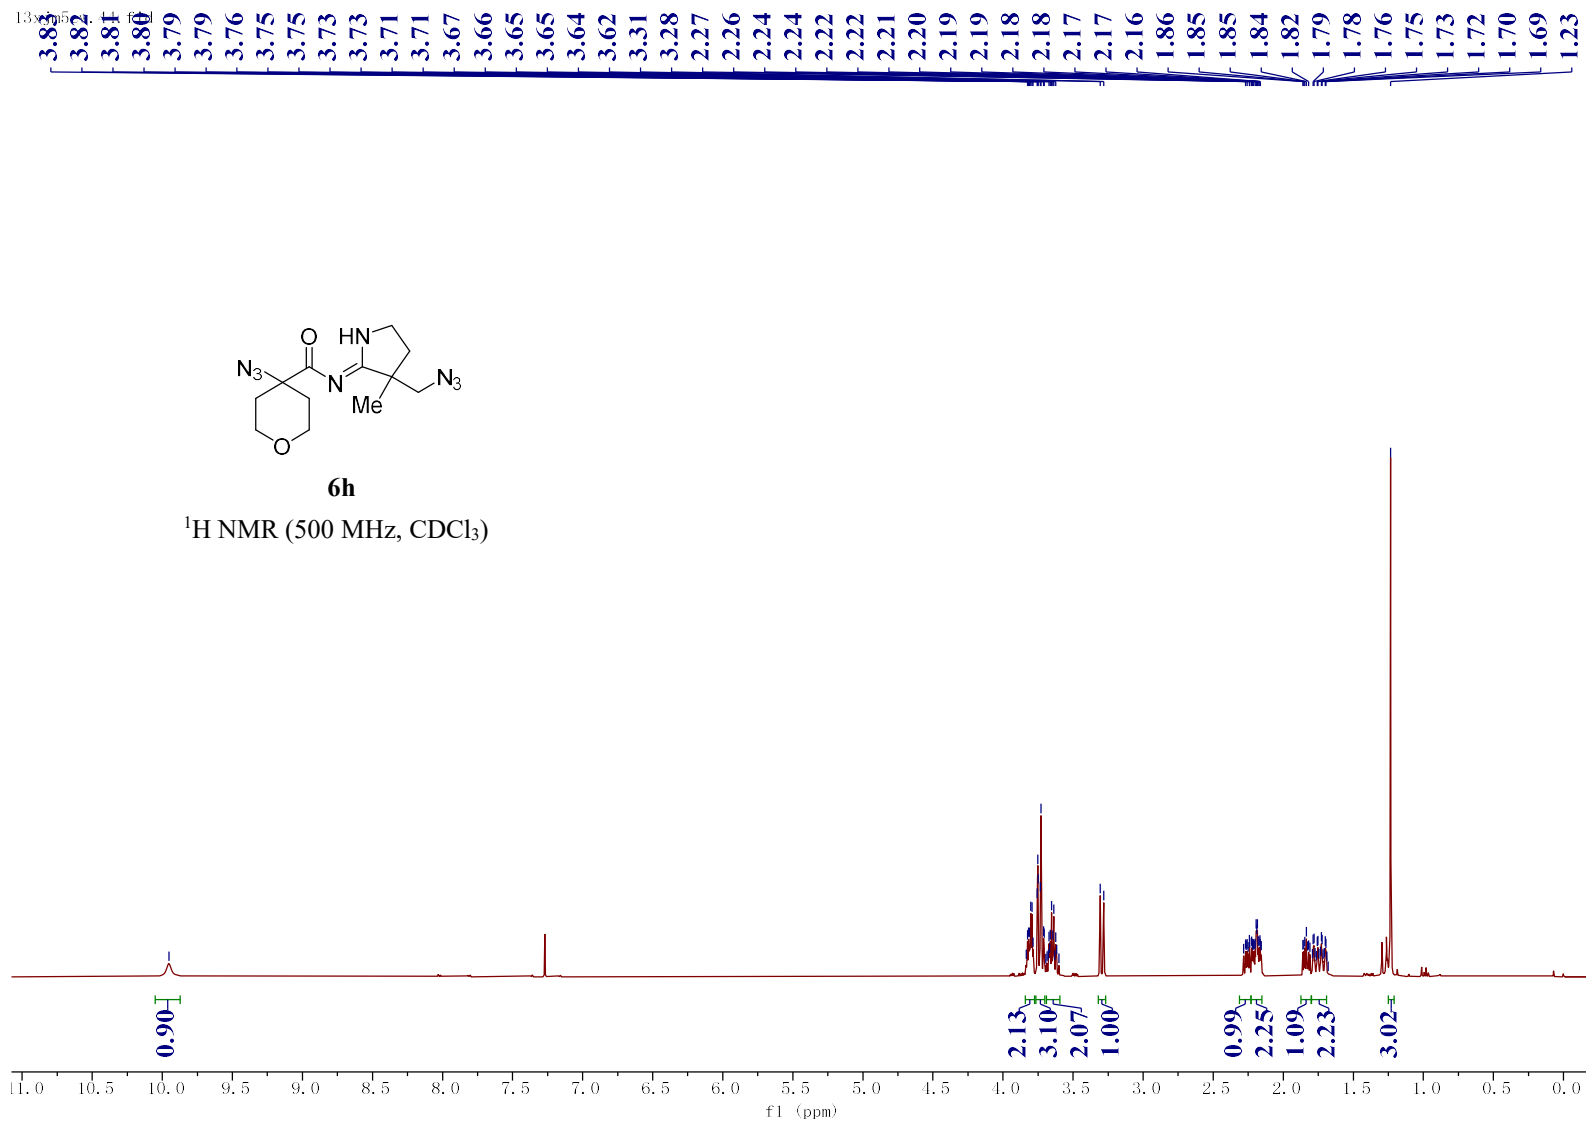

13x jm5ew. 43.

— 186.39

— 178.21

— 65.91

— 64.11

— 64.08

— 57.96

— 48.84

— 44.30

— 32.42

— 32.33

— 30.10

— 22.37

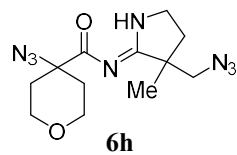

<sup>13</sup>C NMR (125 MHz, CDCl<sub>3</sub>)

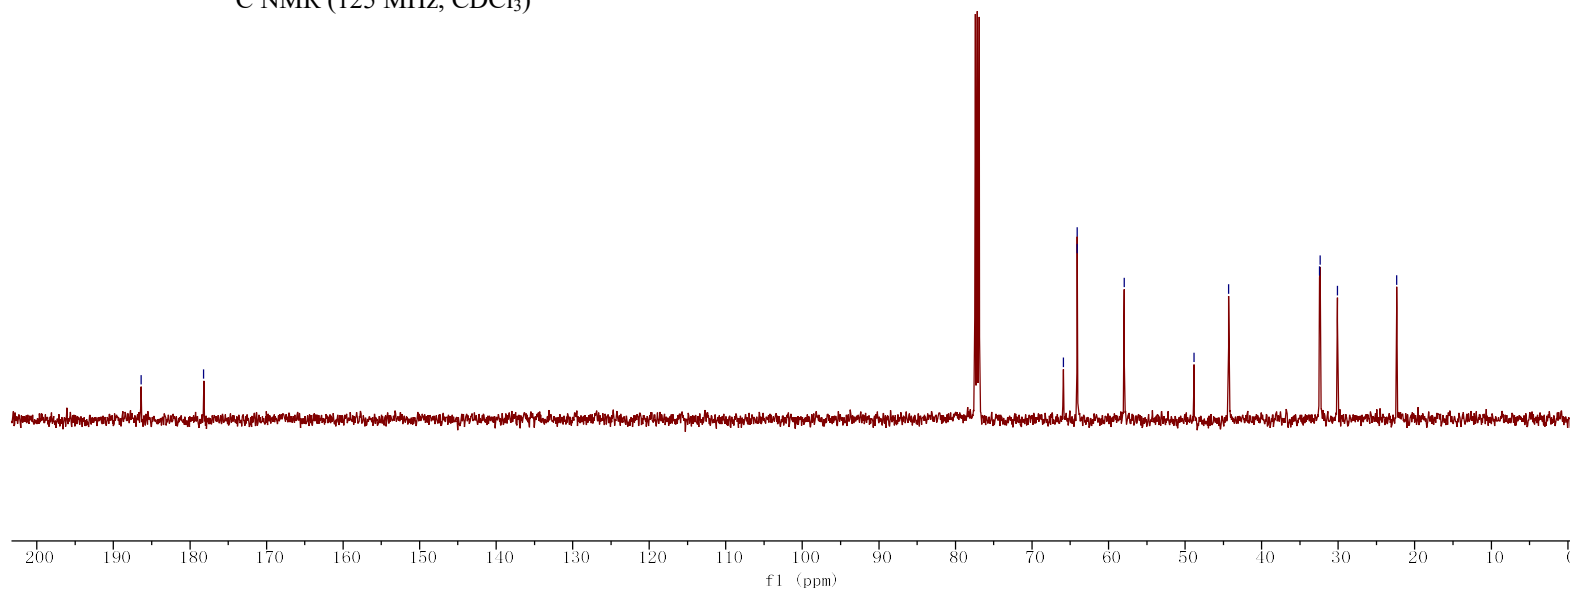

12xjm33ew.

7.39  
7.39  
7.38  
7.38  
7.37  
7.36  
7.33  
7.31  
7.30  
7.28  
7.26  
7.25  
7.24  
5.90  
3.74  
3.73  
3.72  
3.71  
3.71  
3.70  
3.69  
3.68  
3.62  
3.61  
3.59  
3.59  
3.57  
3.57  
3.55  
3.46  
3.43  
2.13  
2.11  
2.10  
2.09  
2.08  
2.06  
1.79  
1.78  
1.77  
1.76  
1.75  
1.74  
1.73  
1.26

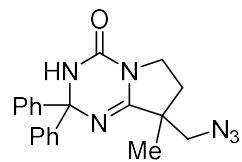

**7b**

<sup>1</sup>H NMR (400 MHz, CDCl<sub>3</sub>)

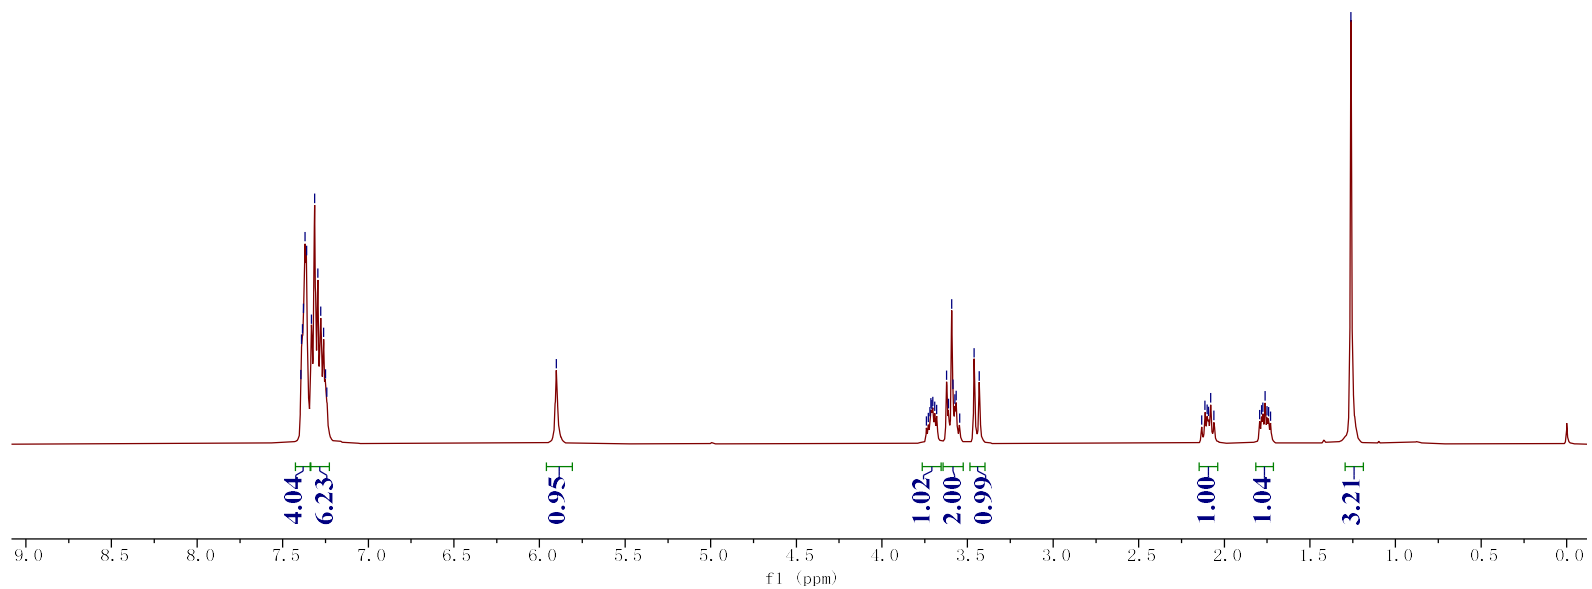

12xjm33ew. 21. fid

— 160.32  
— 151.21  
— 145.46  
— 145.22  
— 128.36  
— 128.35  
— 127.87  
— 126.42  
— 126.41  
  
— 79.20  
  
— 58.29  
— 46.18  
— 41.90  
— 30.76  
— 22.39

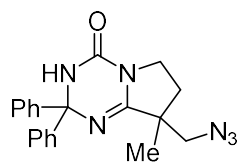

**7b**

<sup>13</sup>C NMR (100 MHz, CDCl<sub>3</sub>)

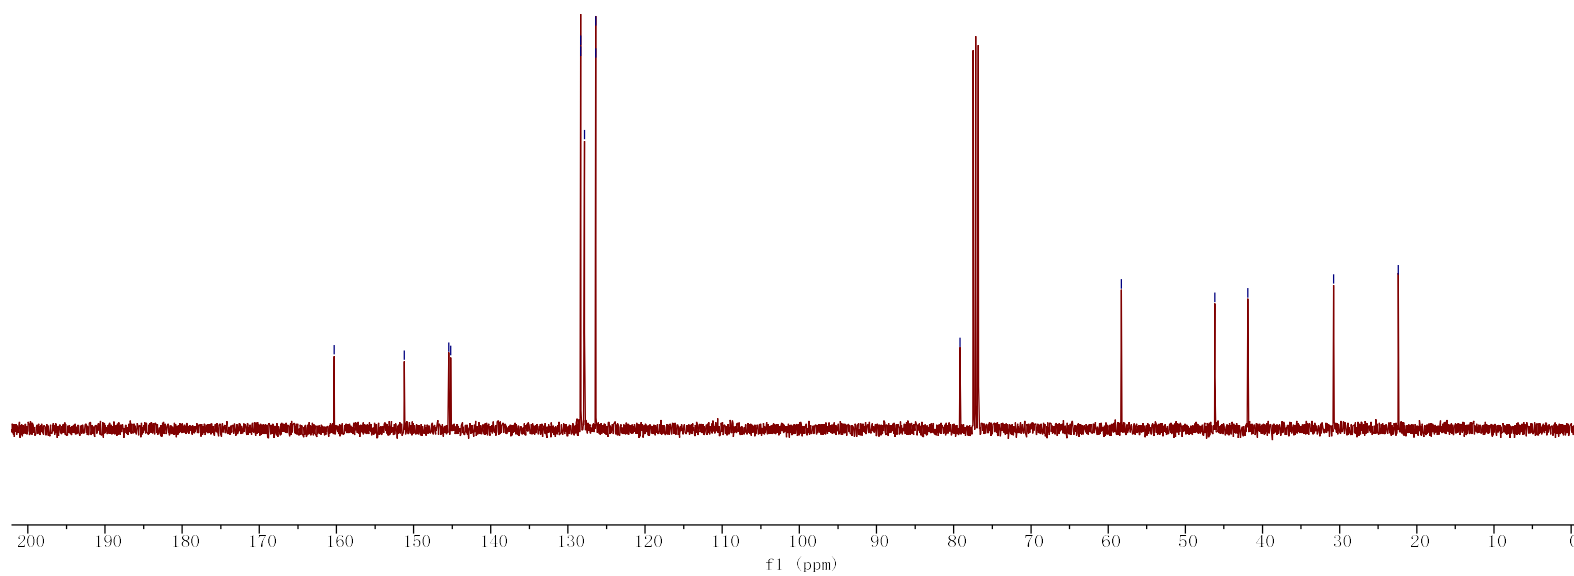



11xjm26ew.1.fid

7.50  
7.49  
7.44  
7.42  
7.39  
7.37  
7.35  
7.33  
7.32  
7.31  
7.28  
7.27

— 5.91

3.96  
3.93  
3.86  
3.83  
3.80  
3.57  
3.55  
3.35  
3.33  
3.30  
2.45  
2.43  
2.41  
2.38  
2.35  
2.31

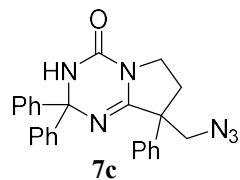

<sup>1</sup>H NMR (400 MHz, CDCl<sub>3</sub>)

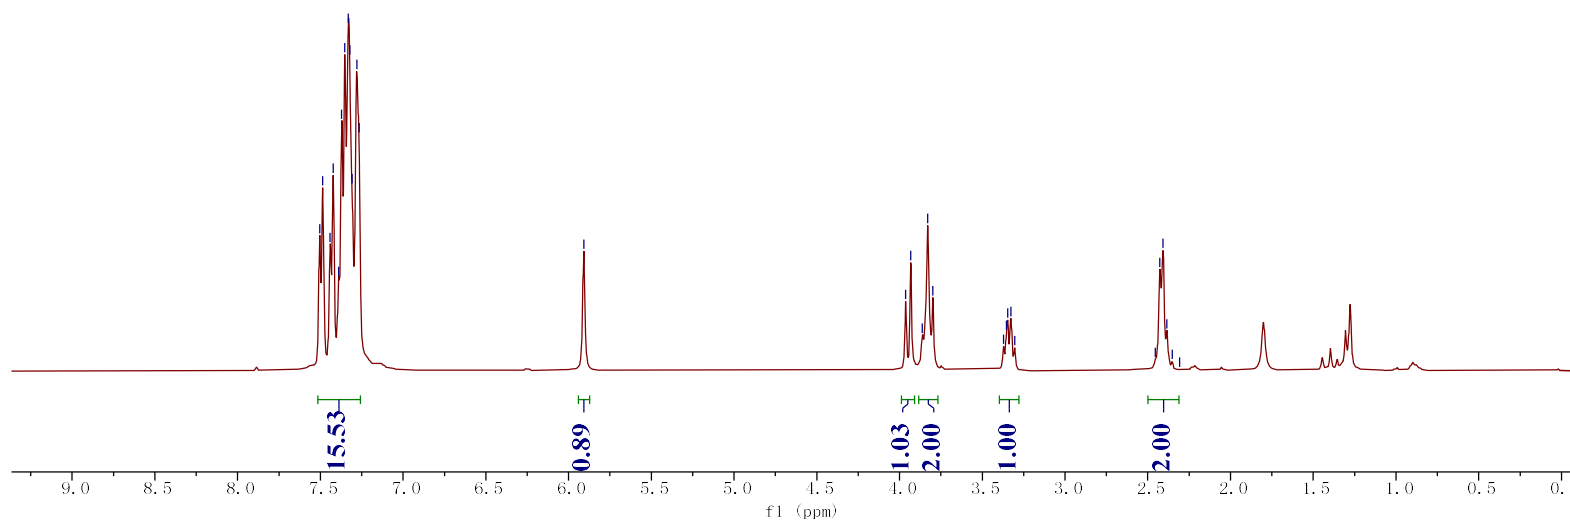

11xjm26ew. 2. fid

158.37  
151.14  
145.12  
144.99  
138.78  
128.91  
128.44  
128.41  
128.03  
127.95  
126.70  
126.58  
126.46

79.62

58.07  
53.95

41.65

30.74

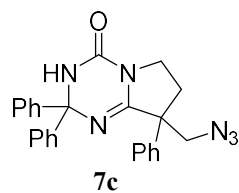

<sup>13</sup>C NMR (100 MHz, CDCl<sub>3</sub>)

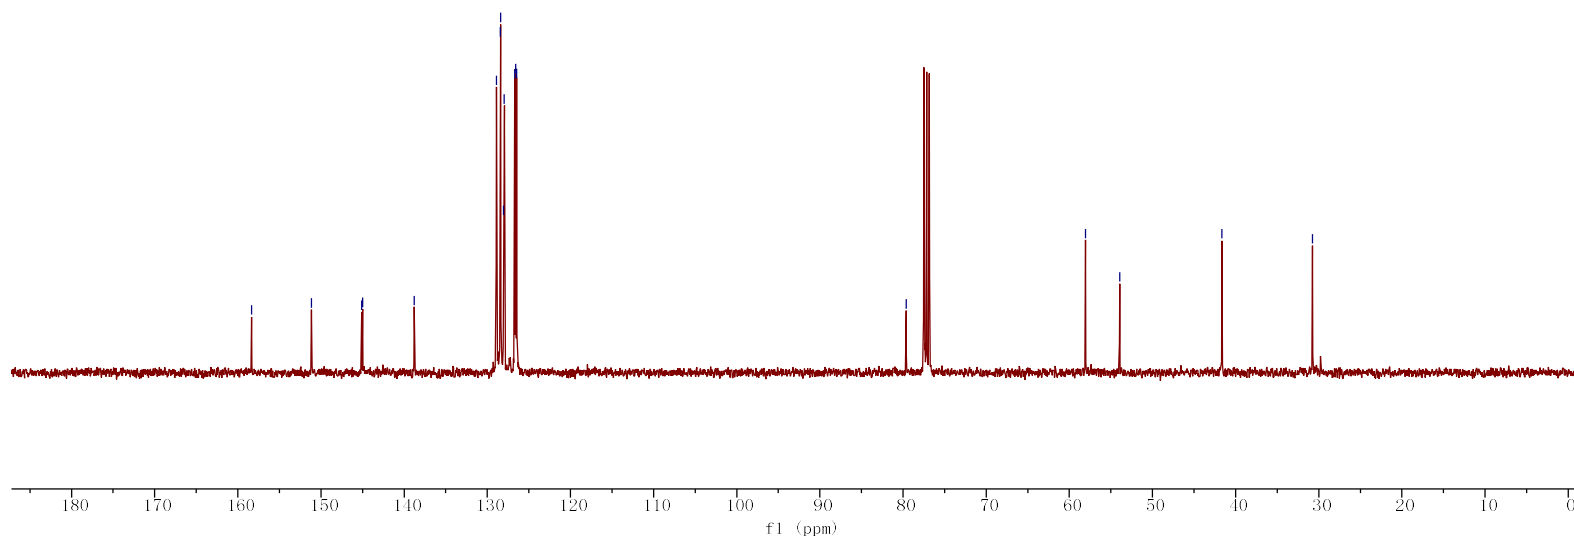

10  
 7.39  
 7.38  
 7.37  
 7.37  
 7.35  
 7.35  
 7.33  
 7.32  
 7.31  
 7.30  
 7.30  
 7.28  
 7.27  
 7.26  
 7.25  
 7.25  
 5.80  
 4.20  
 4.19  
 4.17  
 3.75  
 3.74  
 3.74  
 3.74  
 3.73  
 3.72  
 3.58  
 3.57  
 3.56  
 2.32  
 2.31  
 2.26  
 2.25  
 2.23  
 2.03  
 2.02  
 2.01  
 2.01  
 2.00  
 1.78  
 1.77  
 1.75  
 1.75  
 1.74  
 1.74  
 1.73  
 1.73  
 1.72  
 1.71  
 1.70

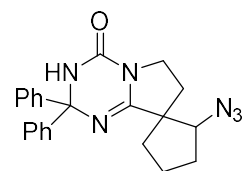

**7d**

<sup>1</sup>H NMR (500 MHz, CDCl<sub>3</sub>)

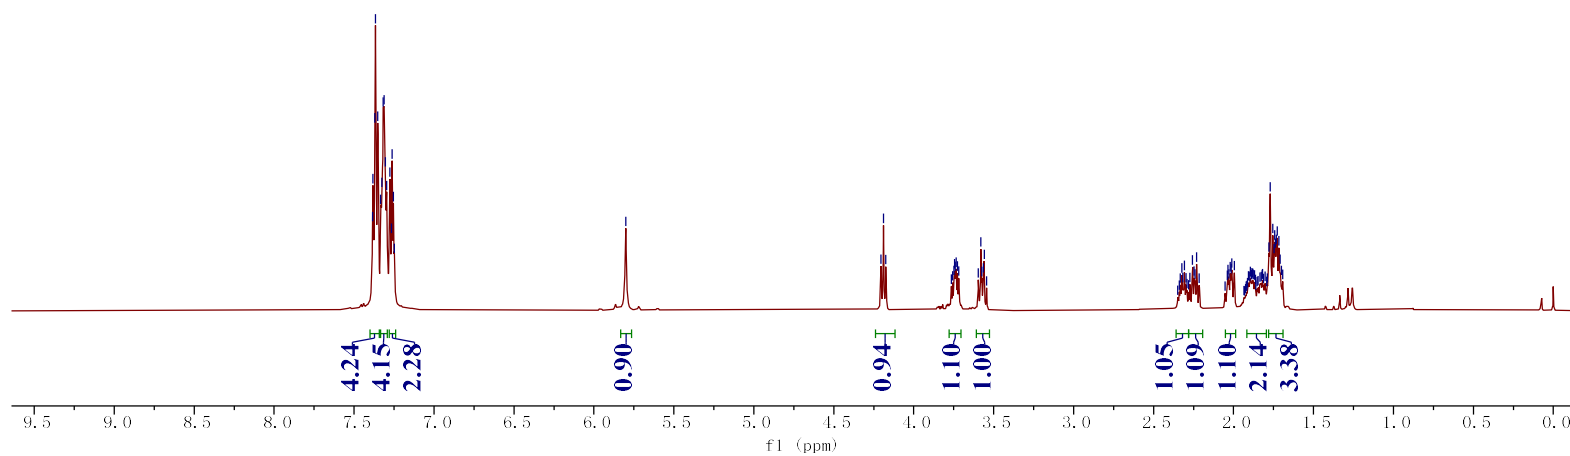

10xjm91ew-2.26.fid

160.71  
151.19  
145.54  
145.28  
128.39  
127.86  
126.38  
126.32  
79.13  
67.94  
55.56  
42.47  
35.67  
30.23  
28.01  
20.94

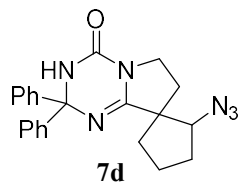

$^{13}\text{C}$  NMR (125 MHz,  $\text{CDCl}_3$ )

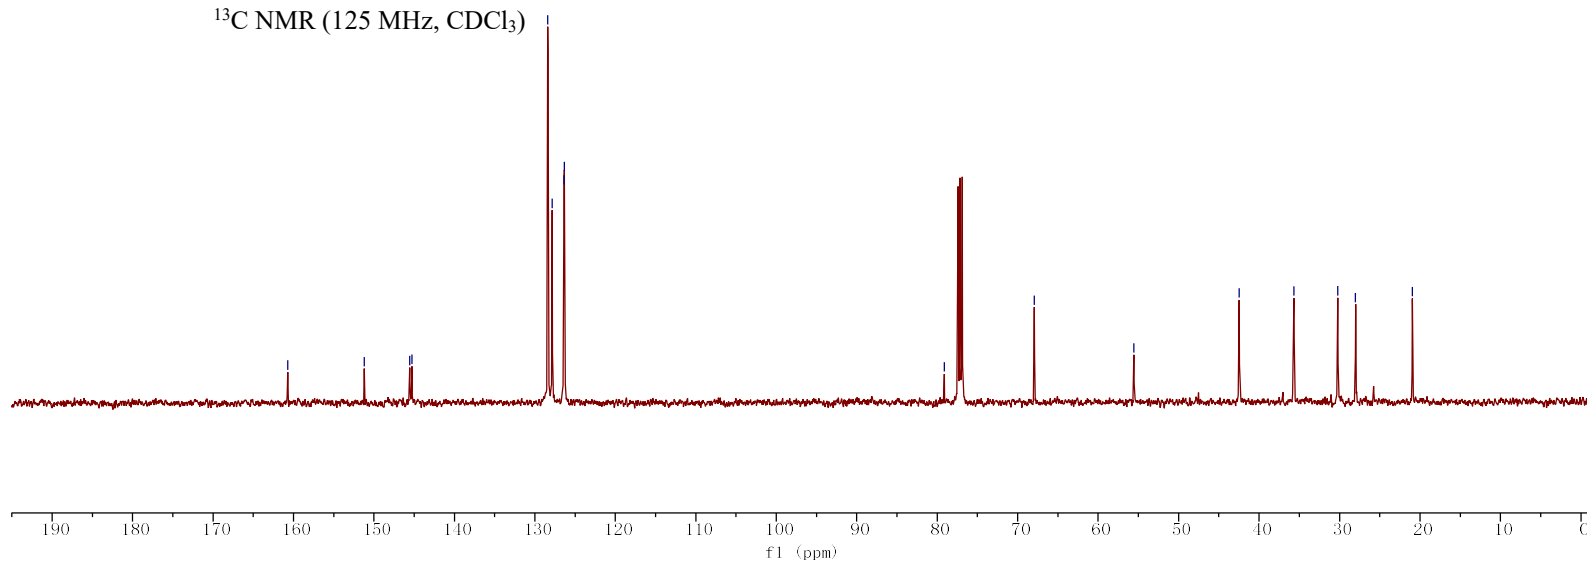

10x76761e

7.43  
7.42  
7.40  
7.40  
7.38  
7.34  
7.33  
7.33  
7.32  
7.31  
7.30  
7.28  
7.28  
7.27  
7.26  
7.25  
7.25  
7.25  
5.84  
5.83  
3.92  
3.73  
3.72  
3.71  
3.70  
3.57  
3.56  
3.55  
3.55  
2.07  
2.06  
1.82  
1.80  
1.79  
1.78  
1.75  
1.73  
1.72  
1.69  
1.68  
1.67  
1.66  
1.65  
1.65  
1.64  
1.63  
1.44  
1.43  
1.43  
1.42

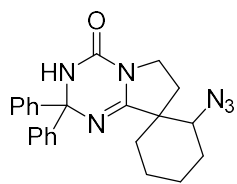

7e

<sup>1</sup>H NMR (500 MHz, CDCl<sub>3</sub>)

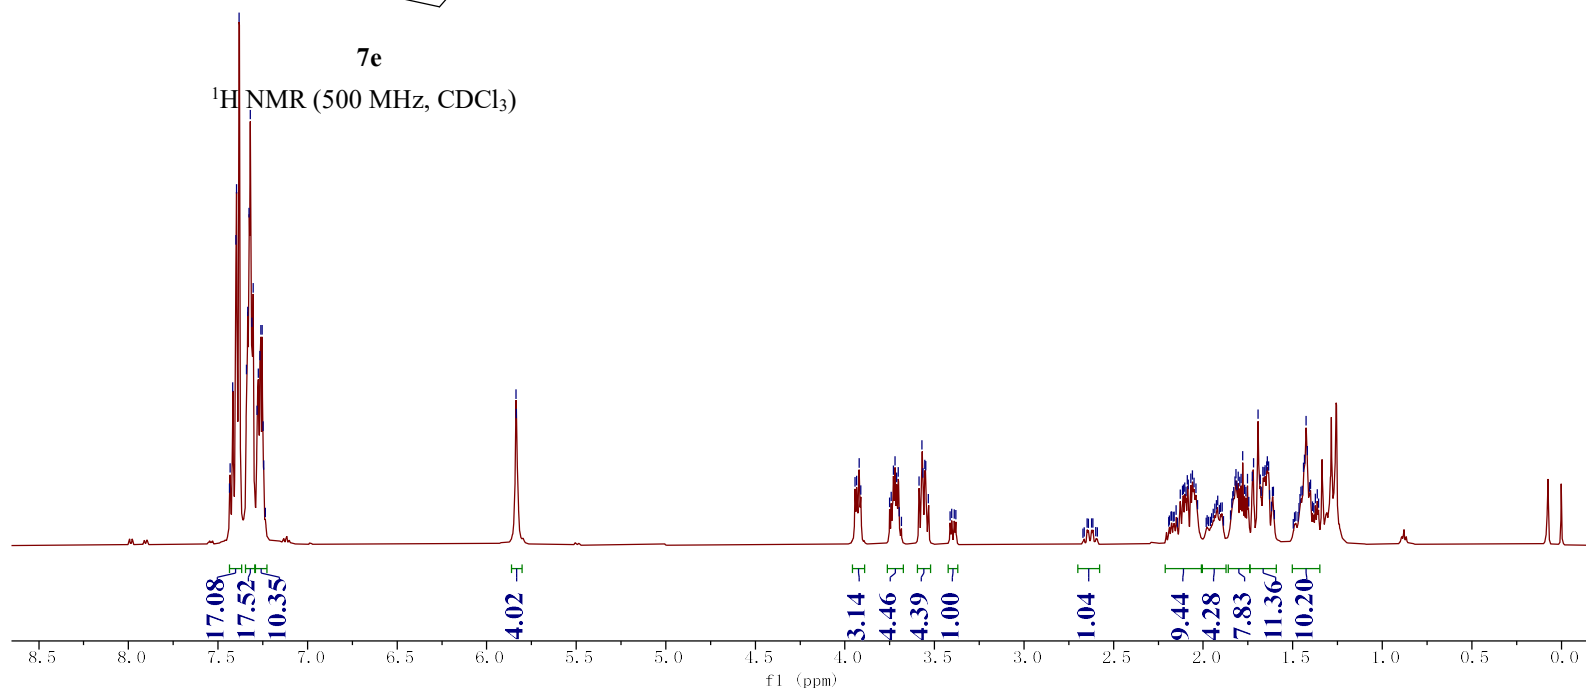

10xjm70bew-c. 1. fid

161.28  
158.57  
151.59  
151.27  
145.59  
145.49  
145.29  
128.34  
127.85  
127.71  
126.49  
126.31

-79.23

66.11  
65.17  
50.41  
48.15  
42.50  
42.02  
35.40  
34.28  
33.82  
28.26  
26.30  
24.94  
24.49  
24.25  
21.33  
20.69

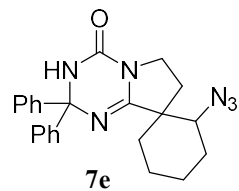

<sup>13</sup>C NMR (125 MHz, CDCl<sub>3</sub>)

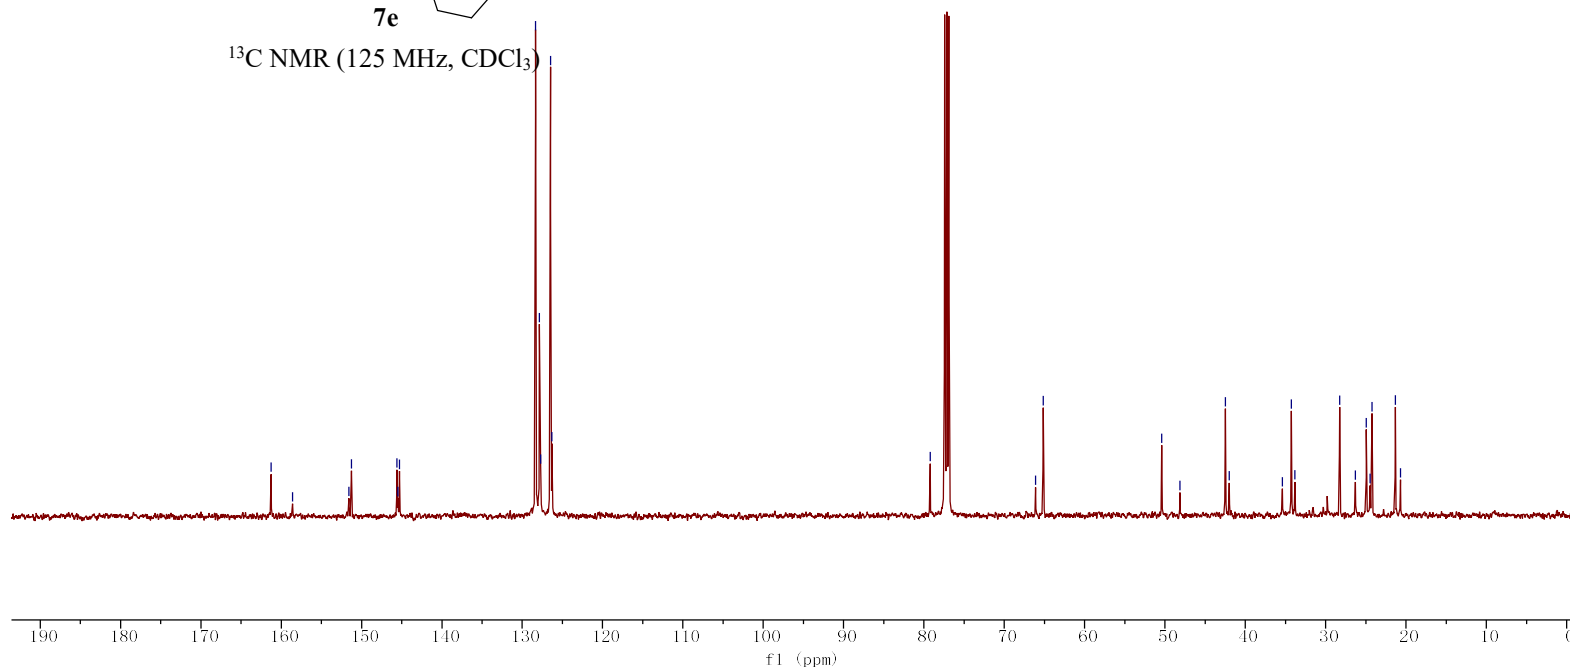

10  
 7.40  
 7.39  
 7.39  
 7.38  
 7.38  
 7.38  
 7.37  
 7.37  
 7.36  
 7.35  
 7.35  
 7.35  
 7.34  
 7.33  
 7.33  
 7.32  
 7.32  
 7.31  
 7.31  
 7.30  
 7.29  
 7.29  
 7.28  
 7.28  
 7.27  
 5.61  
 3.92  
 3.74  
 3.73  
 3.58  
 3.58  
 3.56  
 2.07  
 1.82  
 1.81  
 1.80  
 1.79  
 1.75  
 1.73  
 1.72  
 1.71  
 1.69  
 1.65  
 1.65  
 1.44  
 1.43  
 1.43  
 1.42  
 1.42

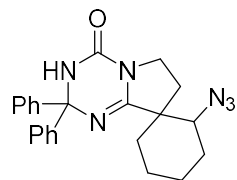

**7e-major**

<sup>1</sup>H NMR (400 MHz, CDCl<sub>3</sub>)

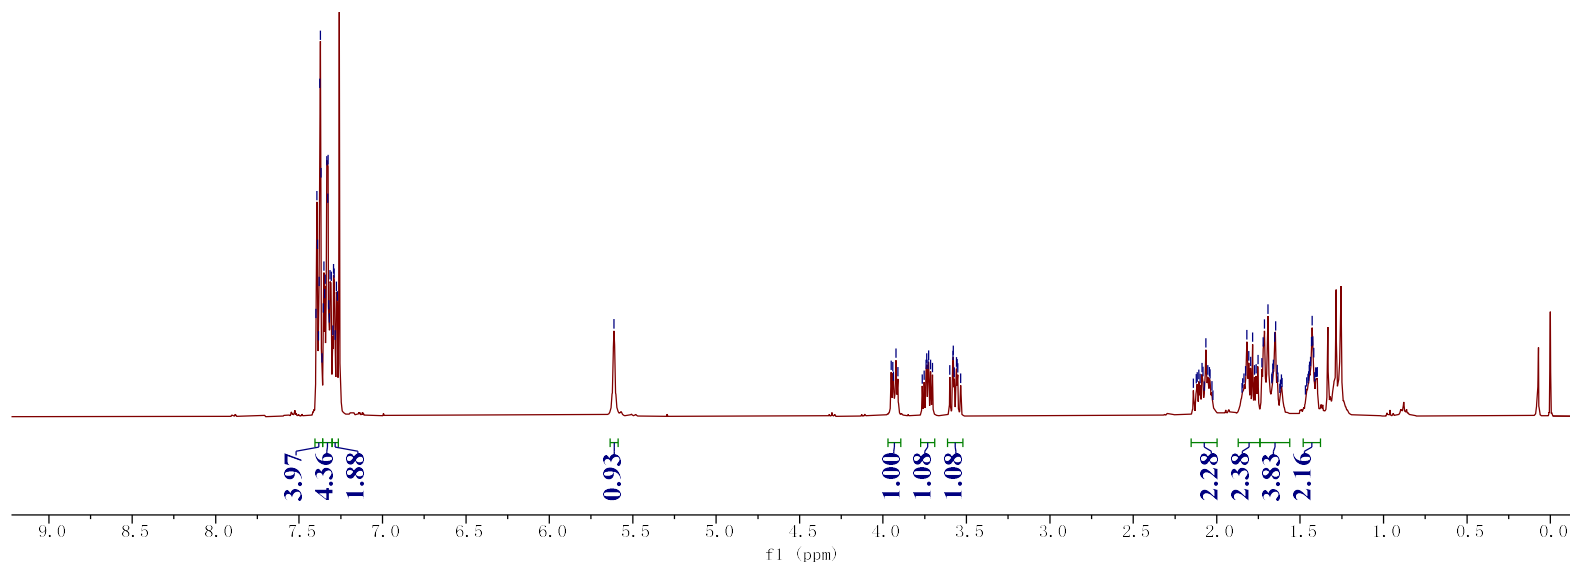

10xjm71y1.5.fid

— 161.35

~ 151.13

~ 145.58

~ 145.27

~ 128.38

~ 127.90

~ 126.51

— 79.27

— 65.20

— 50.43

— 42.53

~ 34.30

~ 28.29

~ 24.96

~ 24.27

~ 21.36

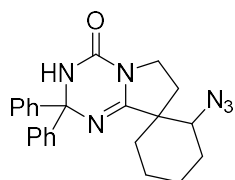

**7e-major**

$^{13}\text{C}$  NMR (125 MHz,  $\text{CDCl}_3$ )

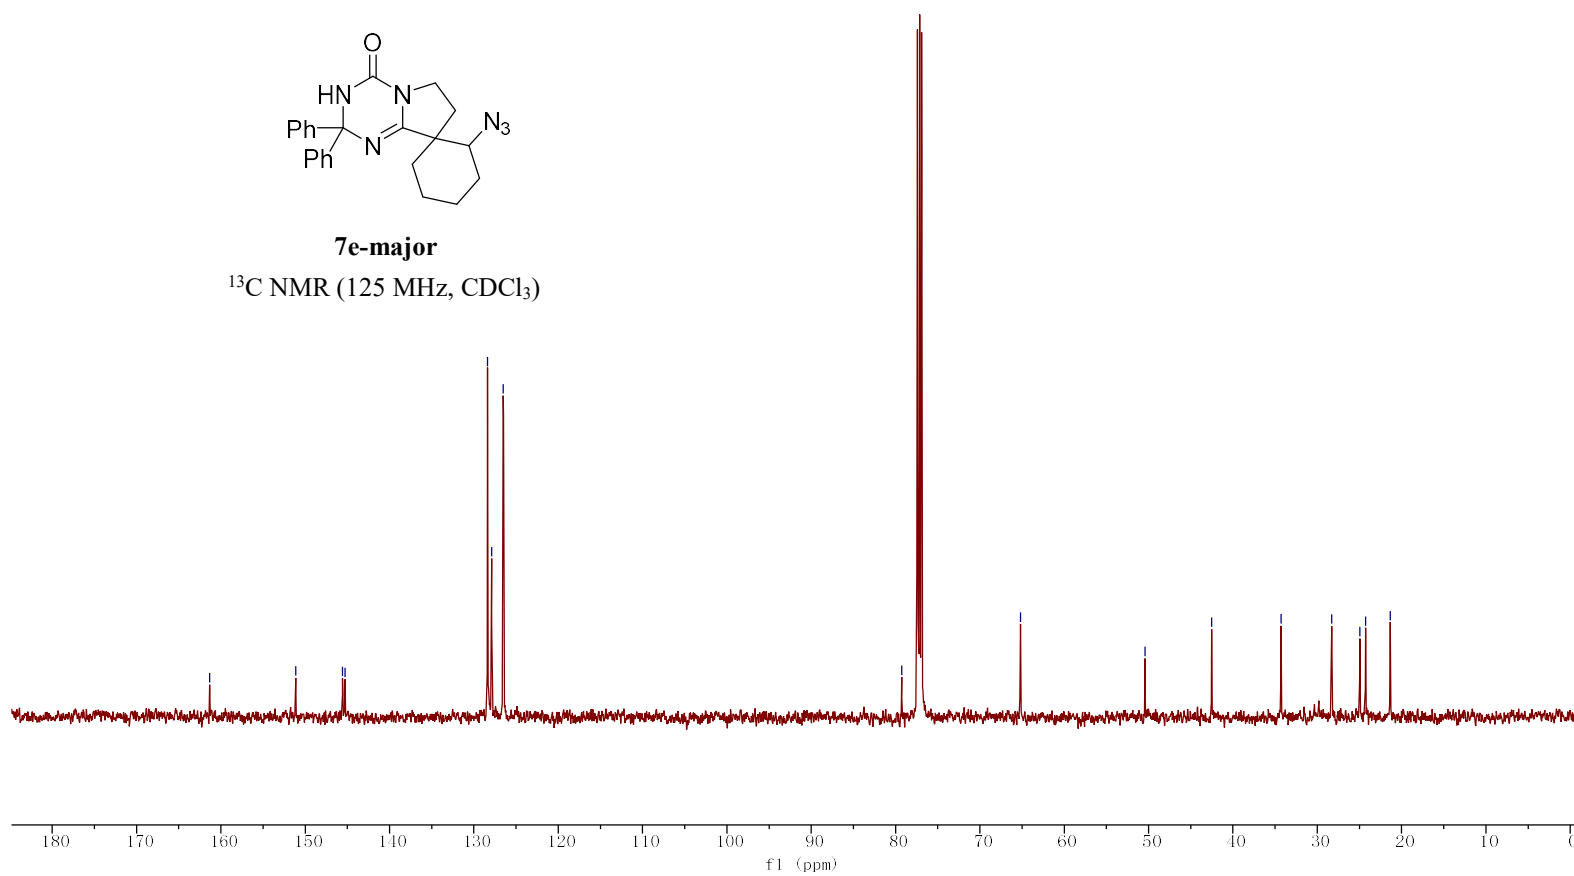



13xjm7bew-2.100072.fid

7.91  
7.81  
7.79  
7.44  
7.43  
7.41  
7.35  
7.35  
7.34  
7.33

— 5.59

4.66  
4.63  
4.58  
4.55

3.55  
3.54  
3.54  
3.53

2.20  
2.18  
2.17  
2.16  
2.15  
2.14

1.91  
1.90  
1.89  
1.89  
1.88  
1.87  
1.49  
1.48  
1.33

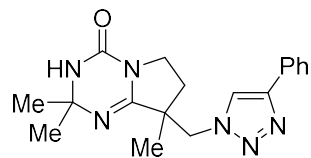

**7f**

<sup>1</sup>H NMR (500 MHz, CDCl<sub>3</sub>)

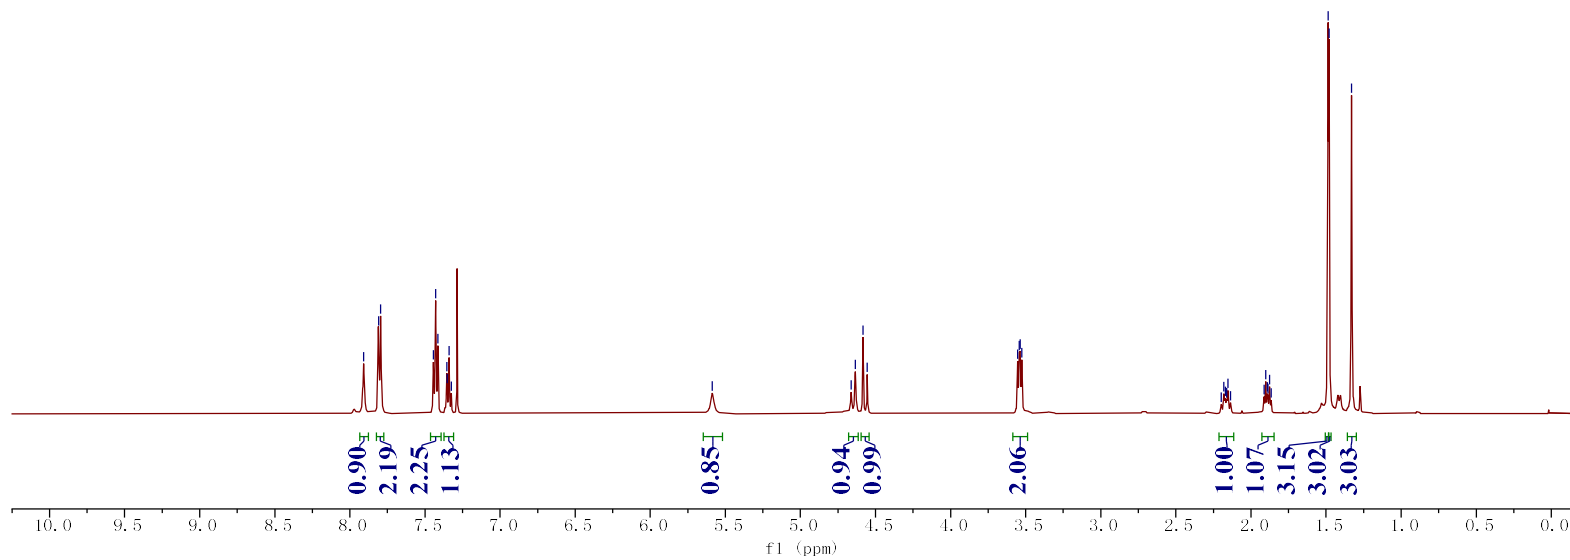

13xjm7bew-2.100073.fid

— 159.06

— 151.56

— 130.51

— 129.02

— 128.35

— 125.72

— 121.37

— 72.44

— 55.43

— 46.14

— 41.27

— 31.14

— 30.88

— 30.33

— 22.94

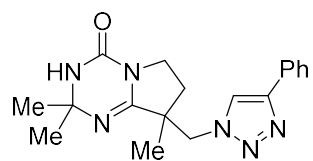

**7f**

<sup>13</sup>C NMR (125 MHz, CDCl<sub>3</sub>)

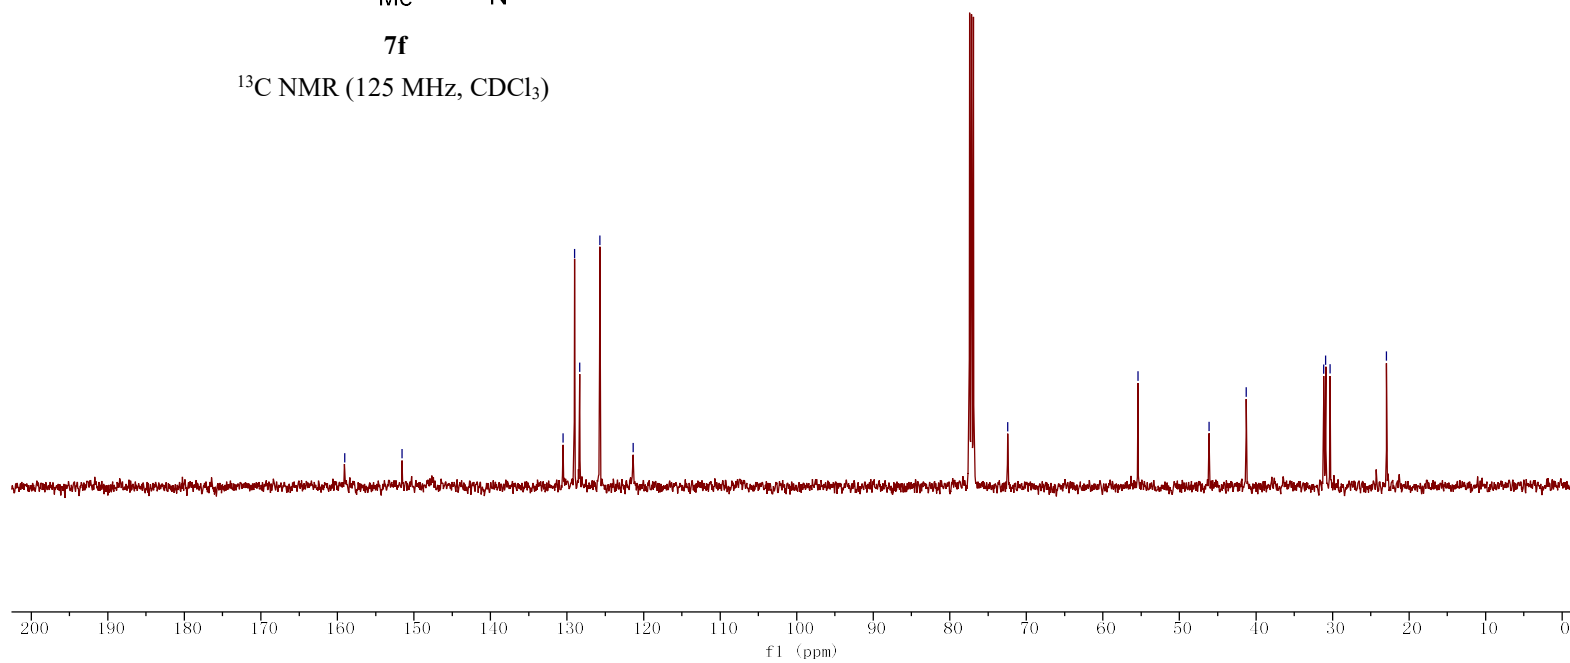

6.23  
3.72  
3.72  
3.71  
3.70  
3.64  
3.61  
3.57  
3.57  
3.56  
3.55  
3.32  
3.30  
2.36  
2.35  
2.34  
2.34  
2.33  
2.33  
2.32  
2.32  
2.31  
2.25  
2.24  
2.24  
2.24  
2.23  
2.23  
2.22  
2.22  
2.17  
2.15  
1.98  
1.97  
1.95  
1.78  
1.78  
1.77  
1.77  
1.76  
1.76  
1.75  
1.75  
1.74  
1.74  
1.74  
1.73  
1.23

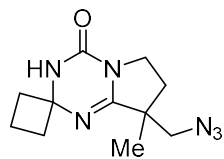

**7g**

<sup>1</sup>H NMR (500 MHz, CDCl<sub>3</sub>)

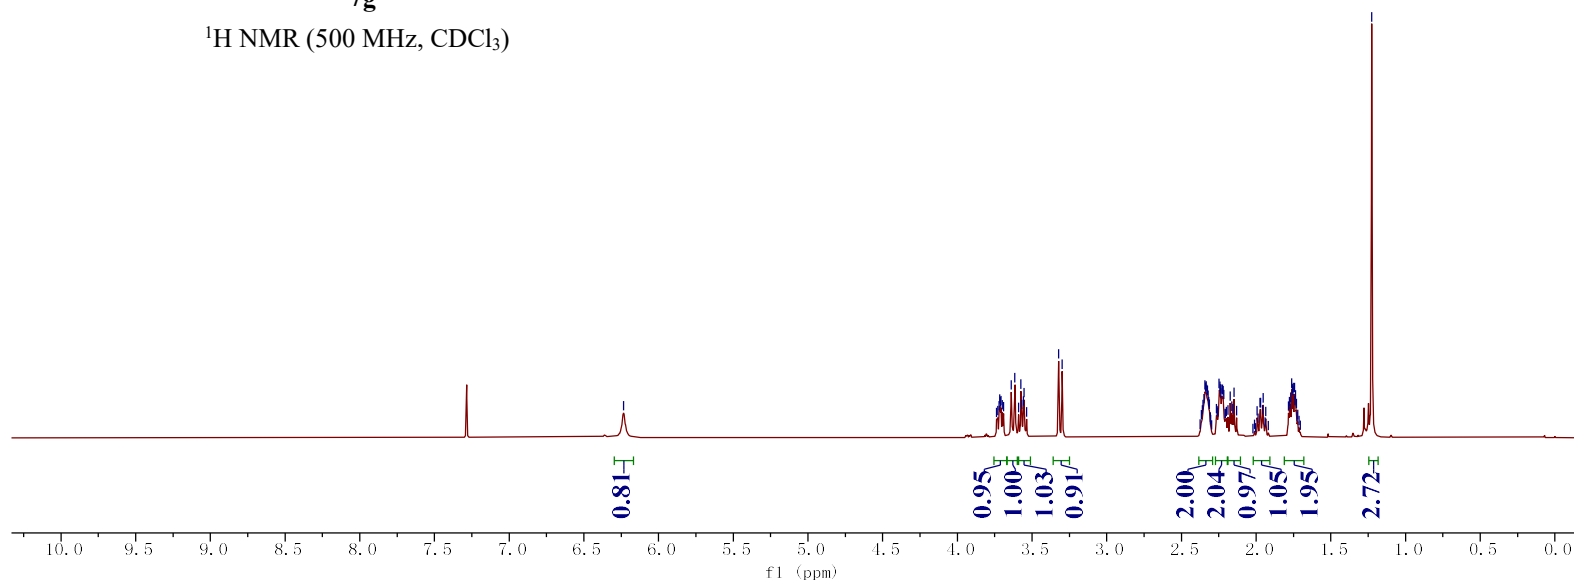

13xjm9cw-e-2.100070.fid

— 159.06  
— 151.77

— 75.02

— 57.83

— 46.02  
— 41.38

— 40.53  
— 40.11

— 30.66

— 22.34

— 12.79

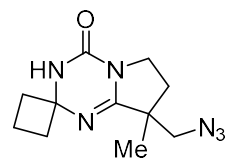

7g

$^{13}\text{C}$  NMR (125 MHz,  $\text{CDCl}_3$ )

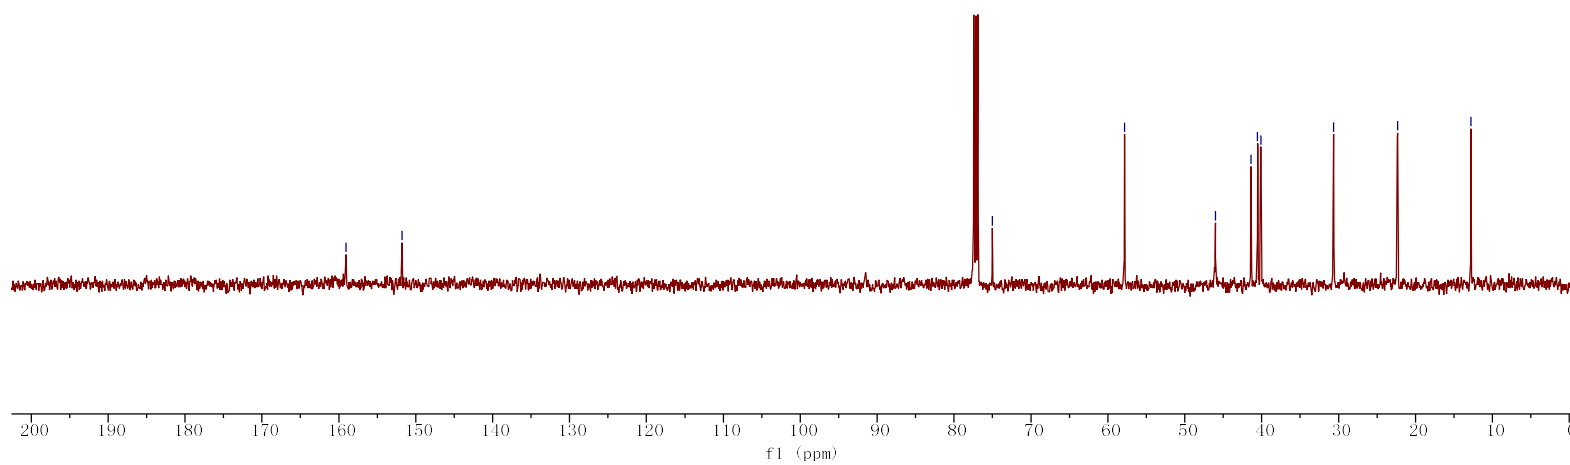

13xjm6cw.10.fid

5.92  
3.94  
3.93  
3.92  
3.91  
3.90  
3.89  
3.88  
3.86  
3.86  
3.80  
3.79  
3.78  
3.76  
3.75  
3.74  
3.73  
3.63  
3.61  
3.60  
3.59  
3.58  
3.56  
3.33  
3.30  
2.22  
2.20  
2.19  
2.18  
2.16  
2.14  
1.89  
1.85  
1.82  
1.81  
1.80  
1.79  
1.78  
1.77  
1.76  
1.75  
1.74  
1.72  
1.71  
1.70  
1.22

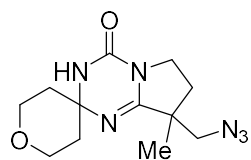

**7h**

<sup>1</sup>H NMR (400 MHz, CDCl<sub>3</sub>)

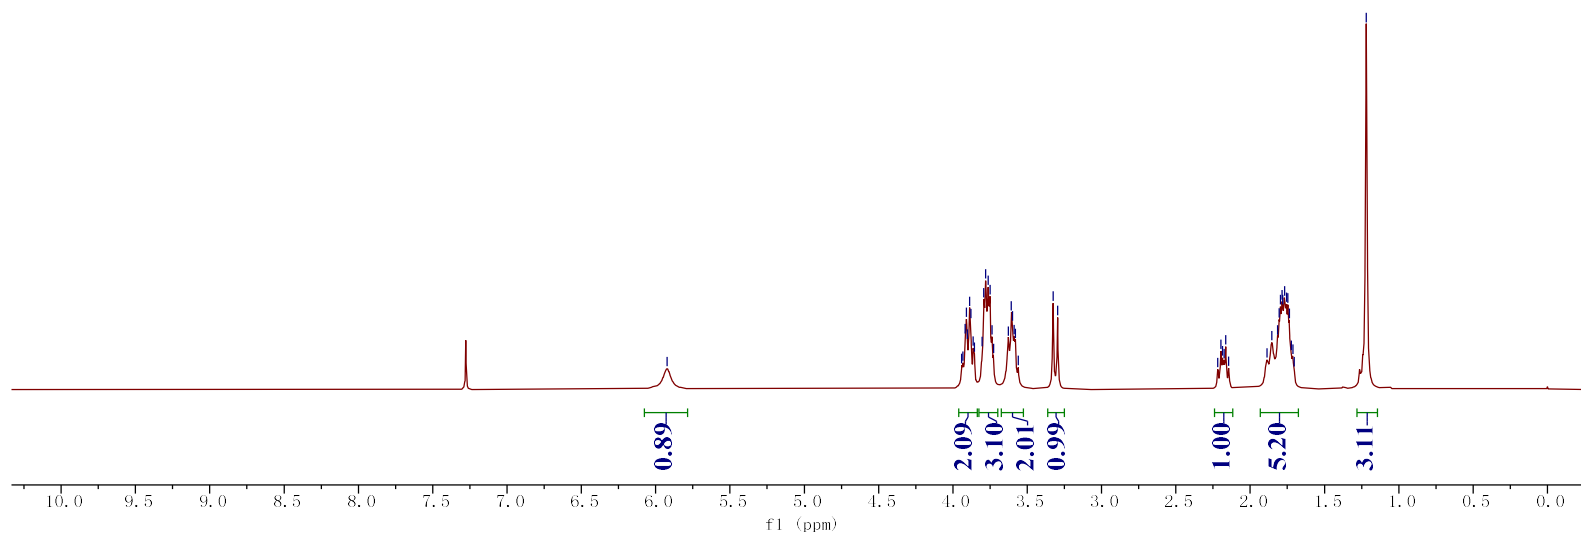

13xjm6cw-e, 18, fid

— 159.35

— 151.88

— 71.16

— 64.03

— 63.99

— 58.00

— 46.12

— 41.58

— 40.35

— 40.10

— 30.62

— 22.56

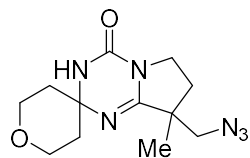

**7h**

<sup>13</sup>C NMR (125 MHz, CDCl<sub>3</sub>)

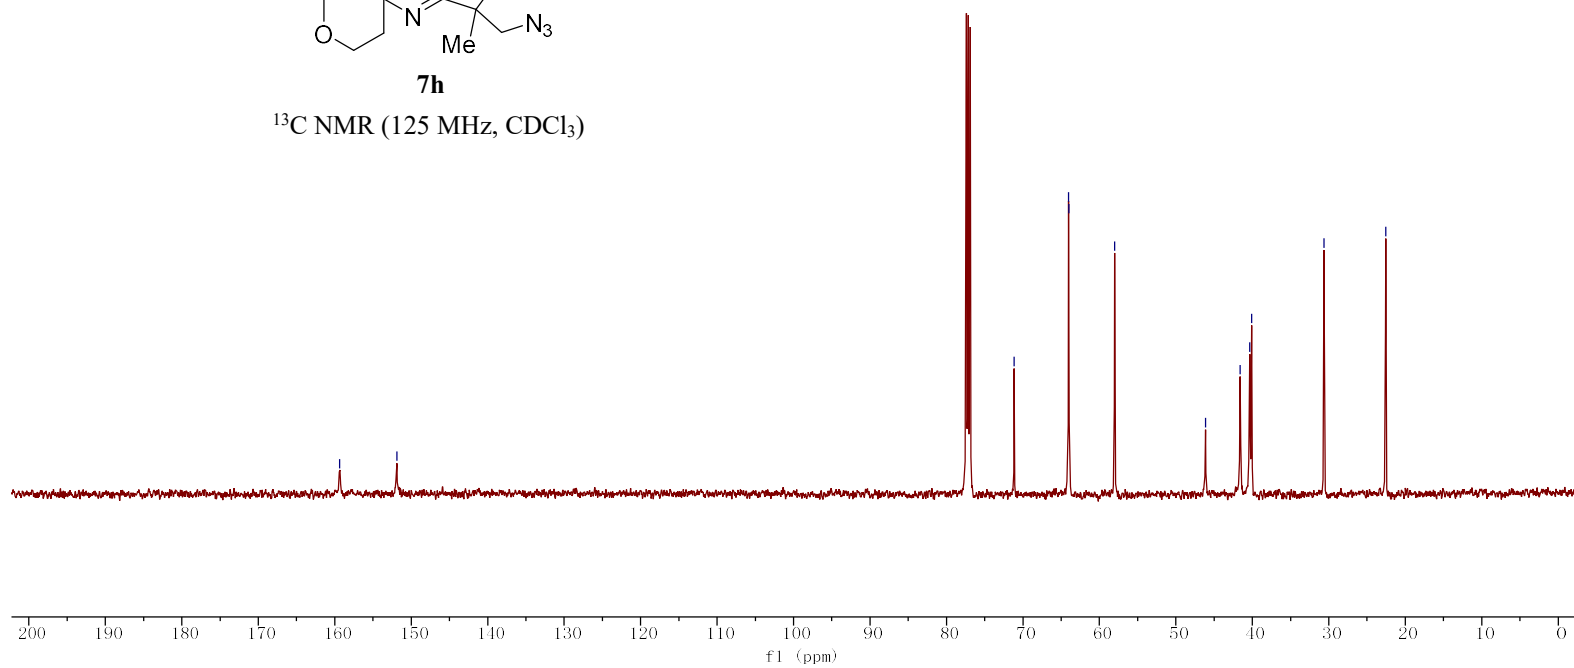

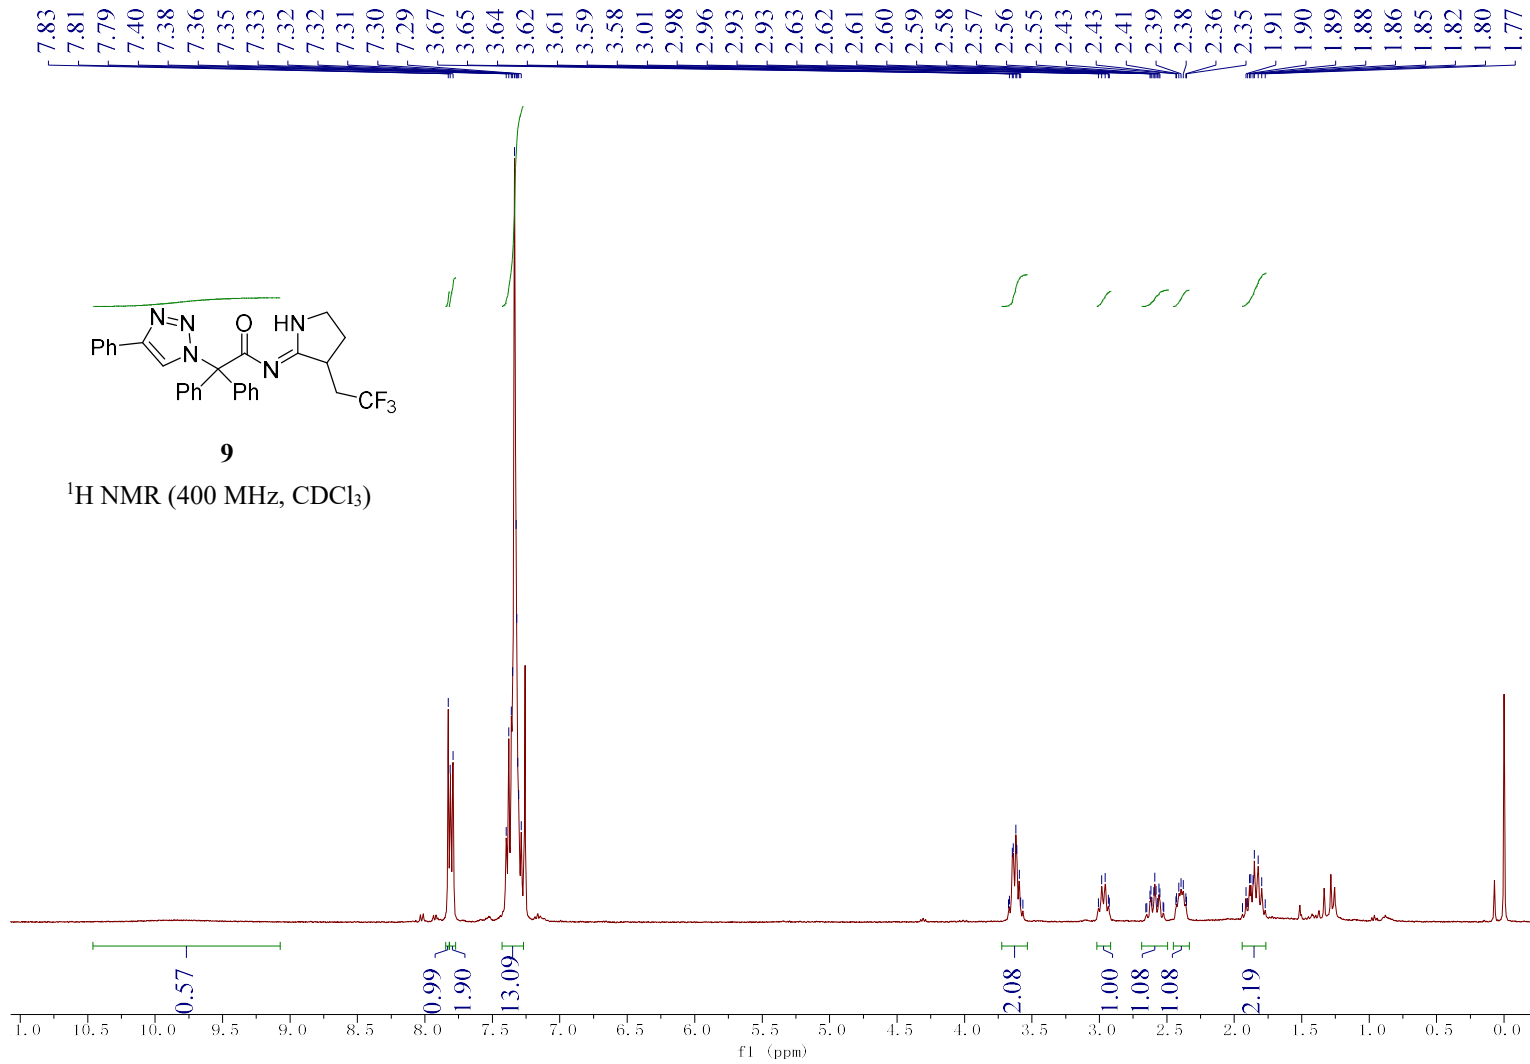

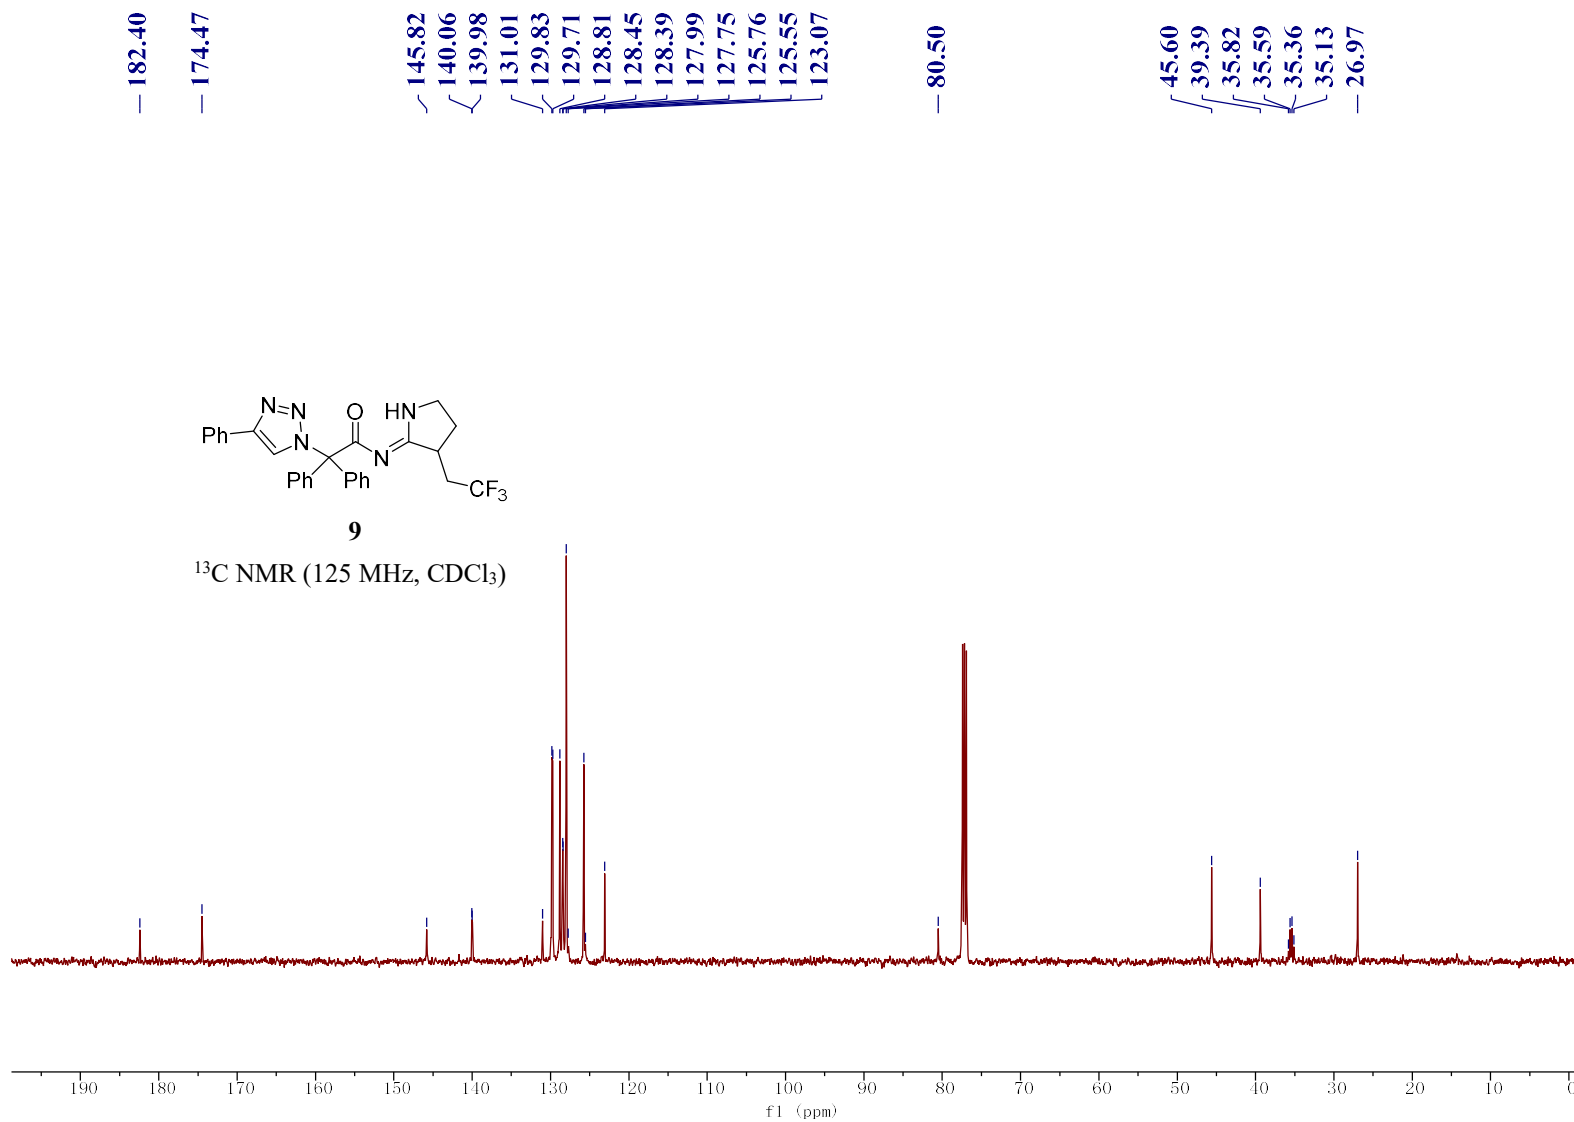



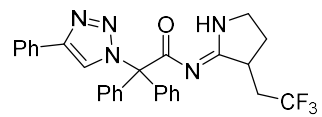

**9**

$^{19}\text{F}$  NMR (470 MHz,  $\text{CDCl}_3$ )

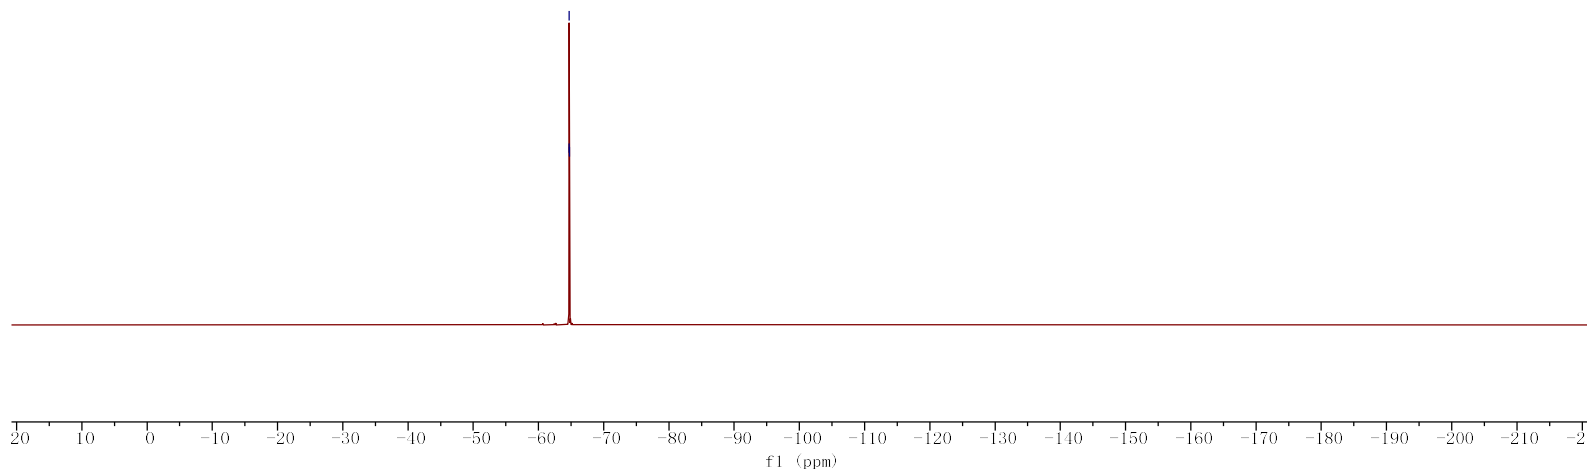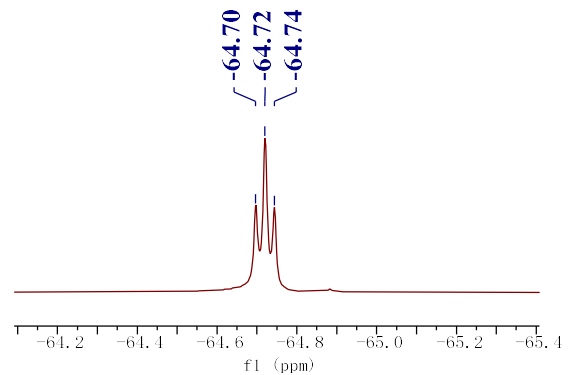

-64.70  
-64.72  
-64.74

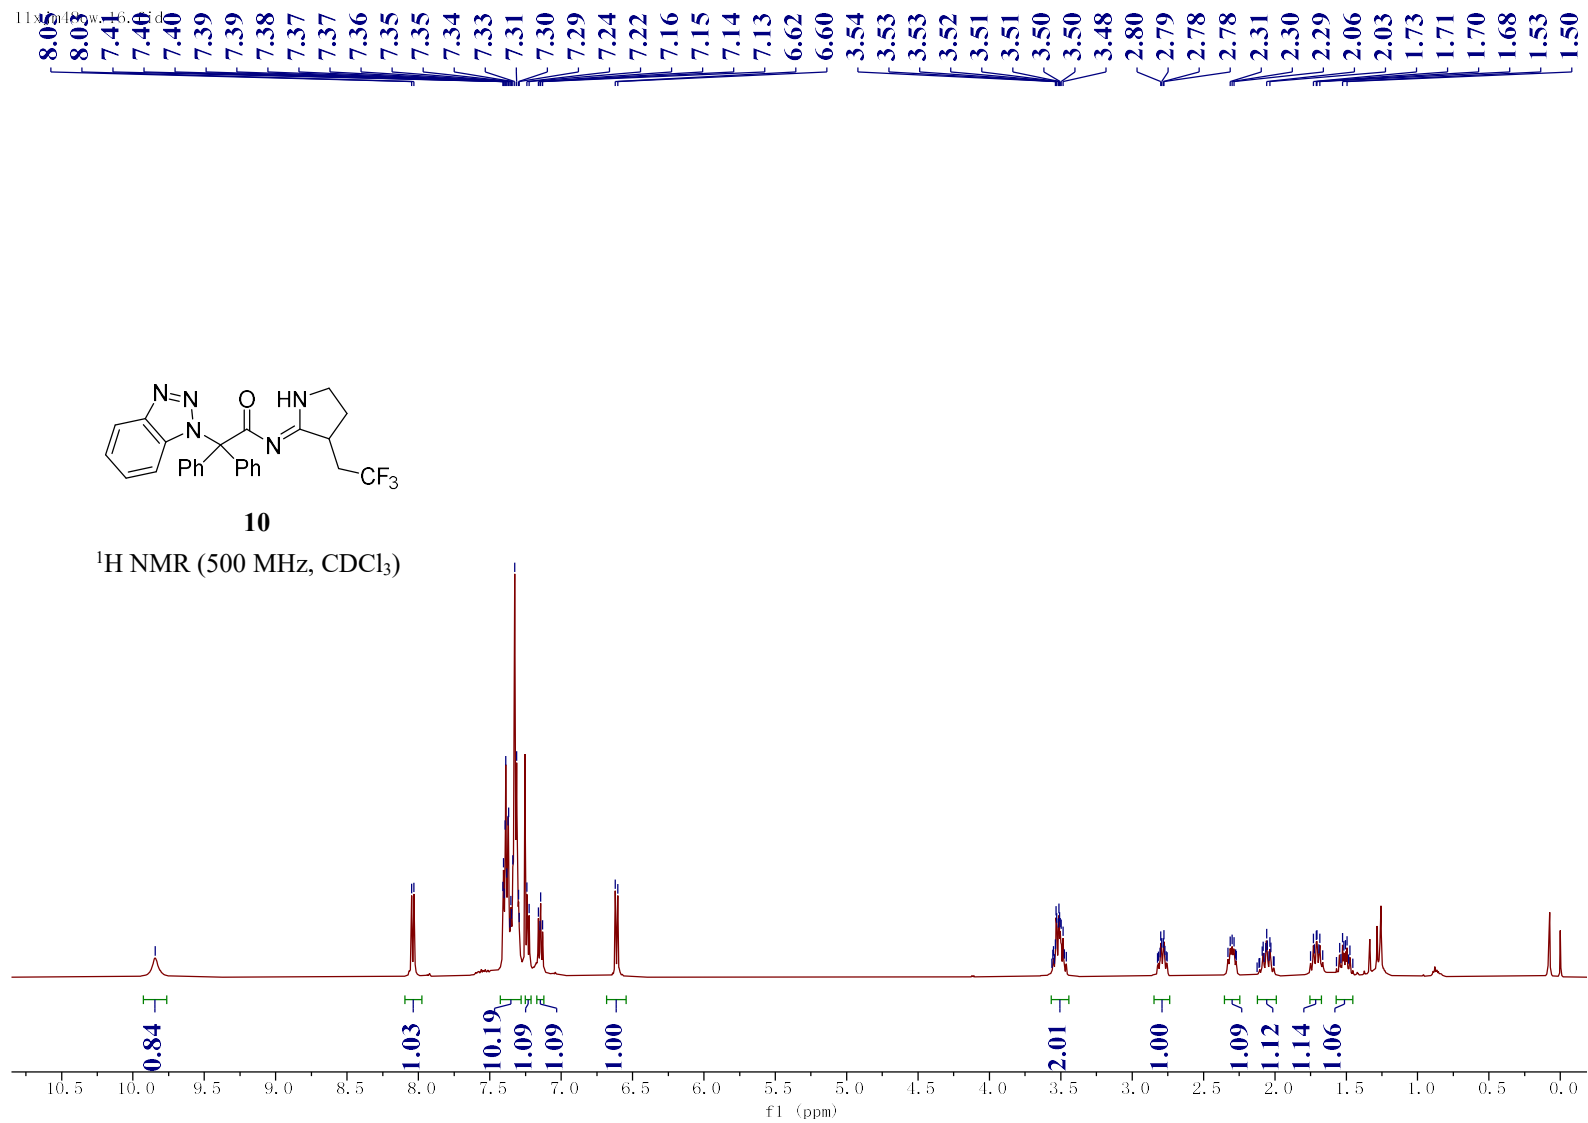

11xjm18ew-c.10.1r

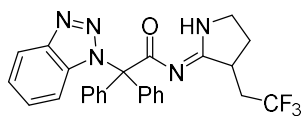

**10**

<sup>13</sup>C NMR (100 MHz, CDCl<sub>3</sub>)

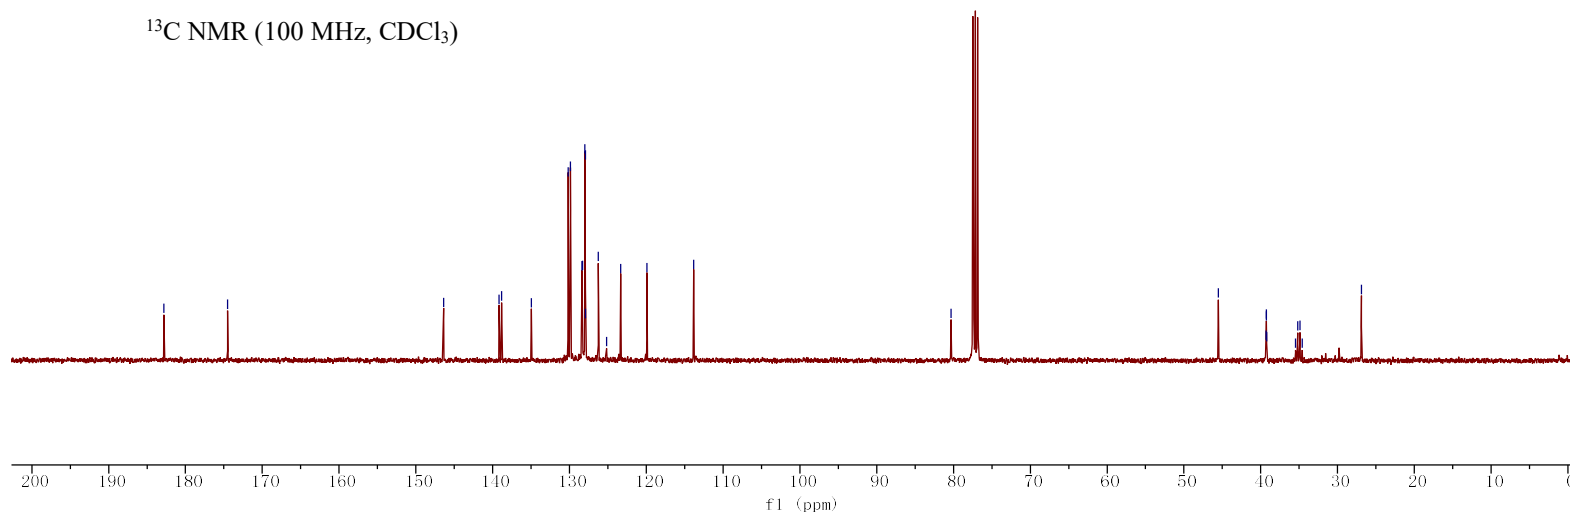

11xjm48ew.17.fid

-64.81  
-64.83  
-64.86

-64.81  
-64.83  
-64.86

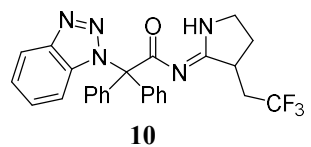

<sup>19</sup>F NMR (470 MHz, CDCl<sub>3</sub>)

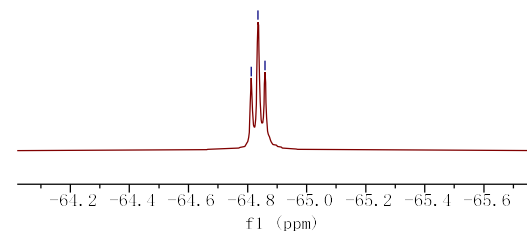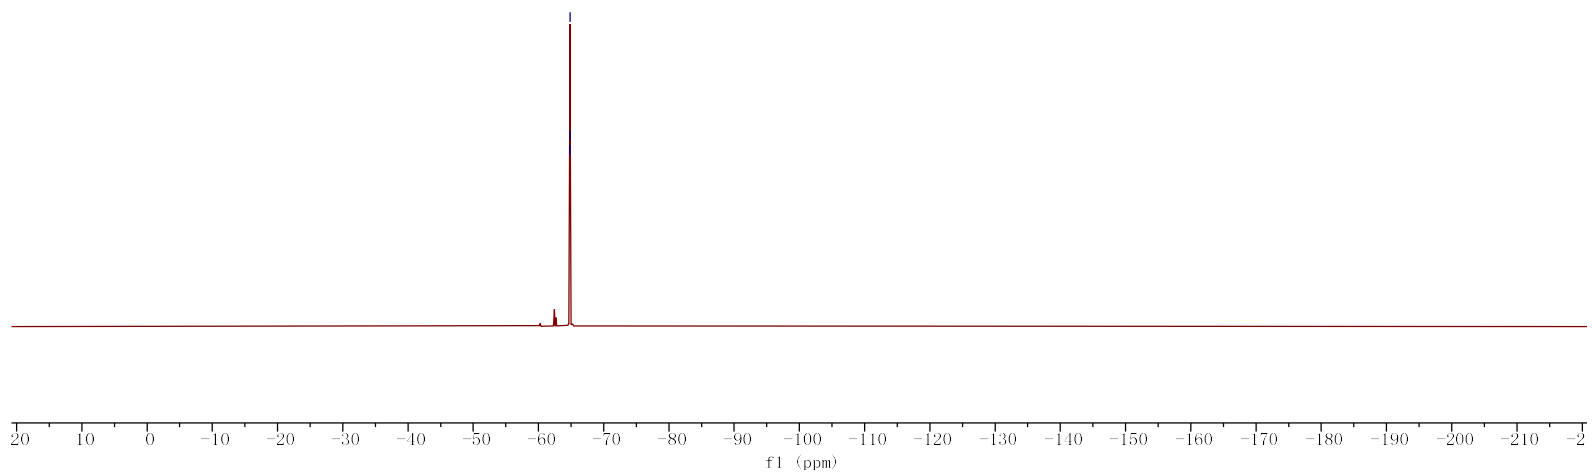

11x21663v300  
BOX01.P02

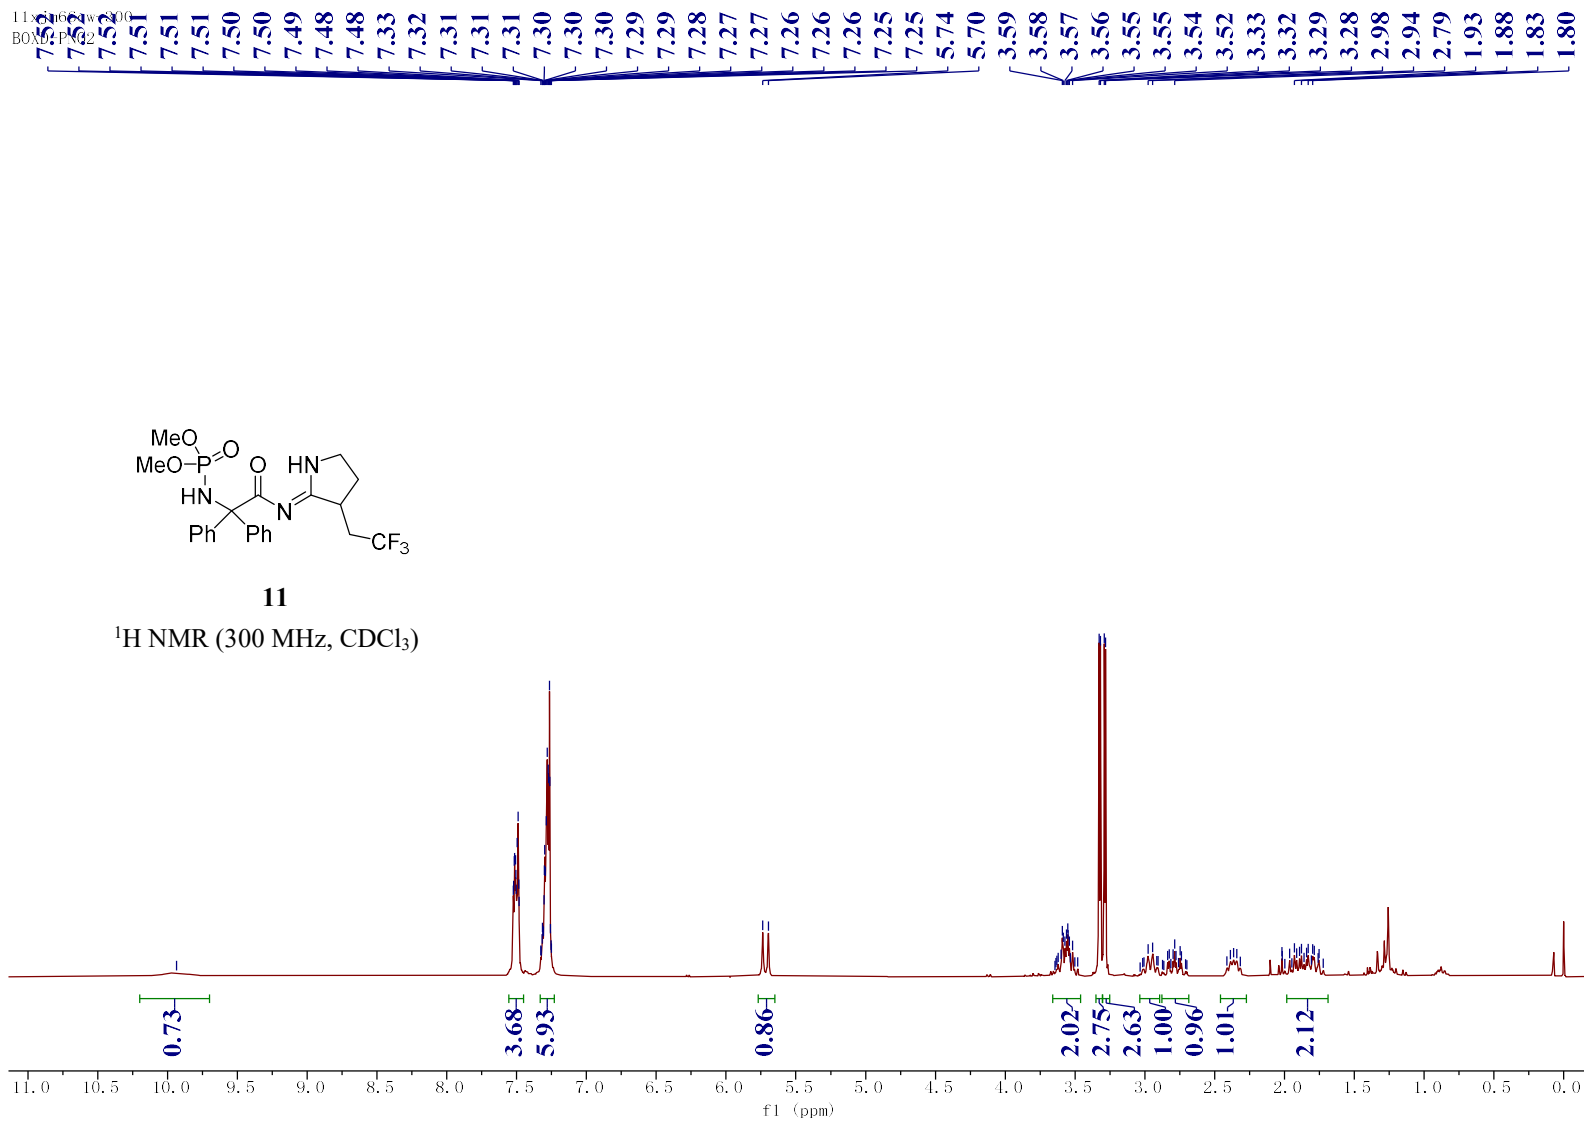

11xjm66ew.

186.09  
185.97

174.57

141.75  
141.71  
129.93  
129.74  
127.96  
127.33  
127.23  
127.05  
125.20

71.81

52.75  
52.69  
45.33  
39.29  
35.86  
35.57  
35.27  
34.99  
26.79

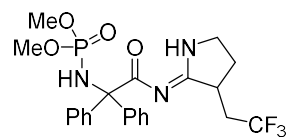

**11**

<sup>13</sup>C NMR (100 MHz, CDCl<sub>3</sub>)

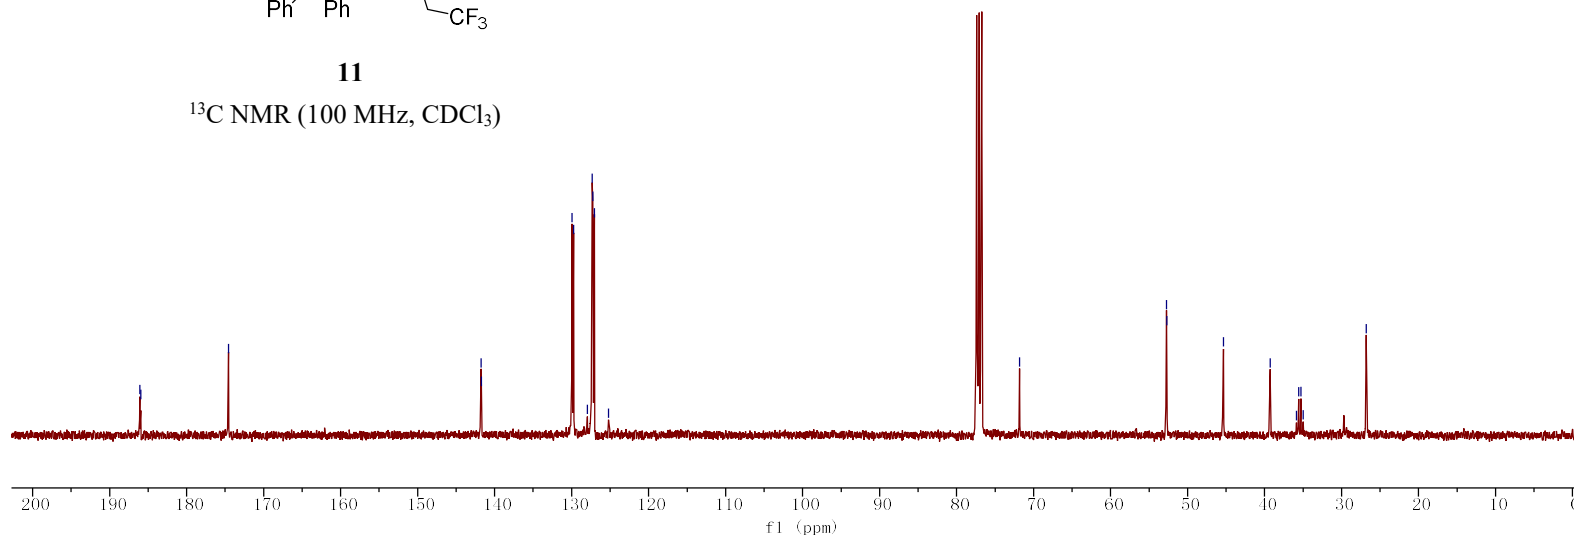

11xjm66ew-2.31.fid

-64.49  
-64.52  
-64.54

-64.49  
-64.52  
-64.54

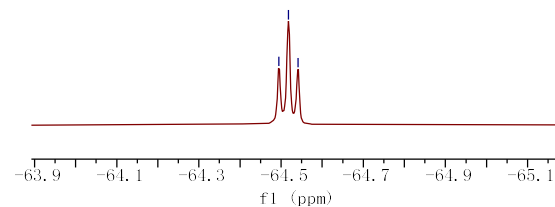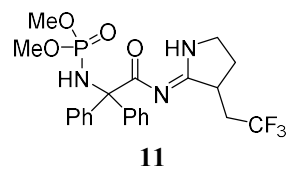

<sup>19</sup>F NMR (470 MHz, CDCl<sub>3</sub>)

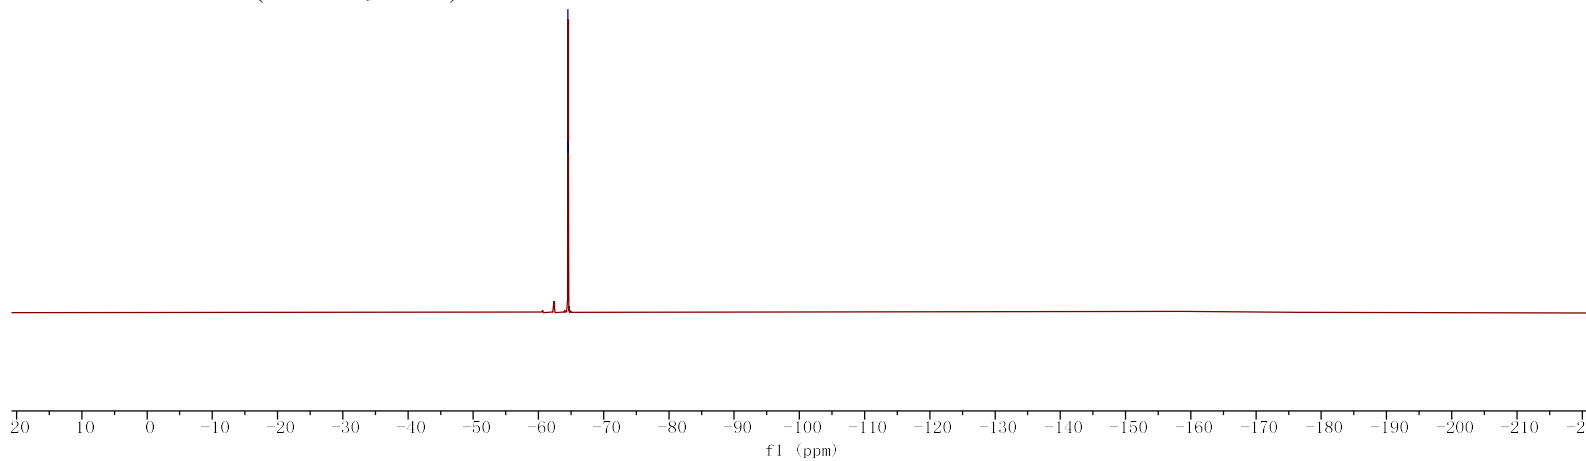

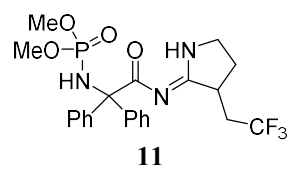

<sup>31</sup>P NMR (162 MHz, CDCl<sub>3</sub>)

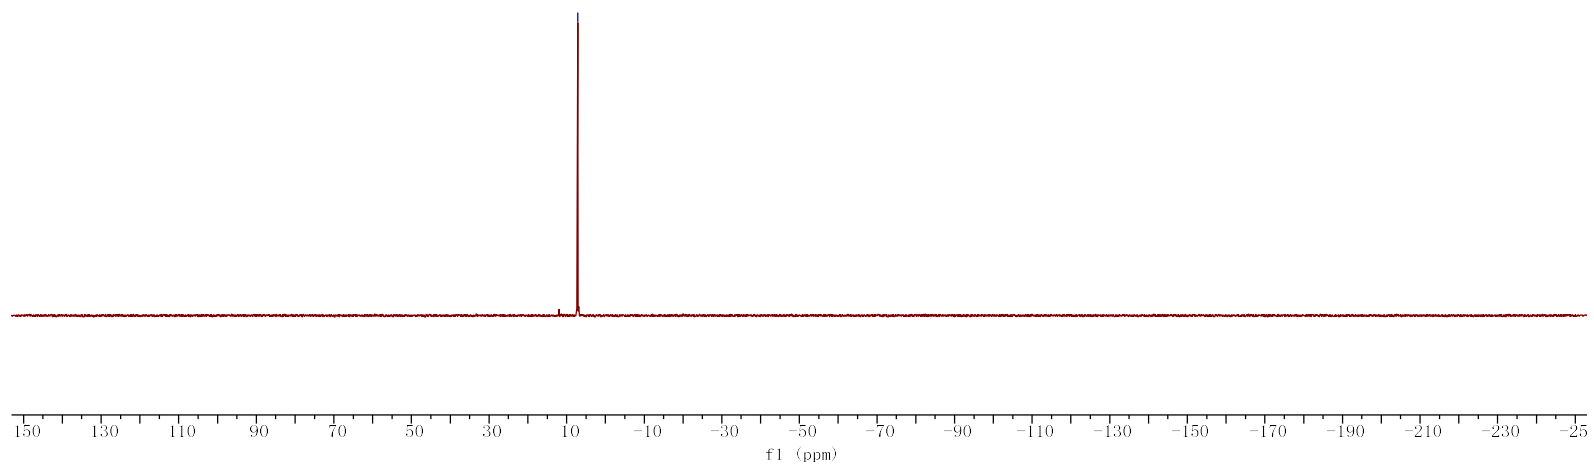



106B.10.fid

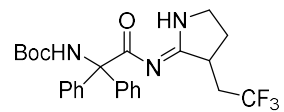

**12**

<sup>1</sup>H NMR (400 MHz, CDCl<sub>3</sub>)

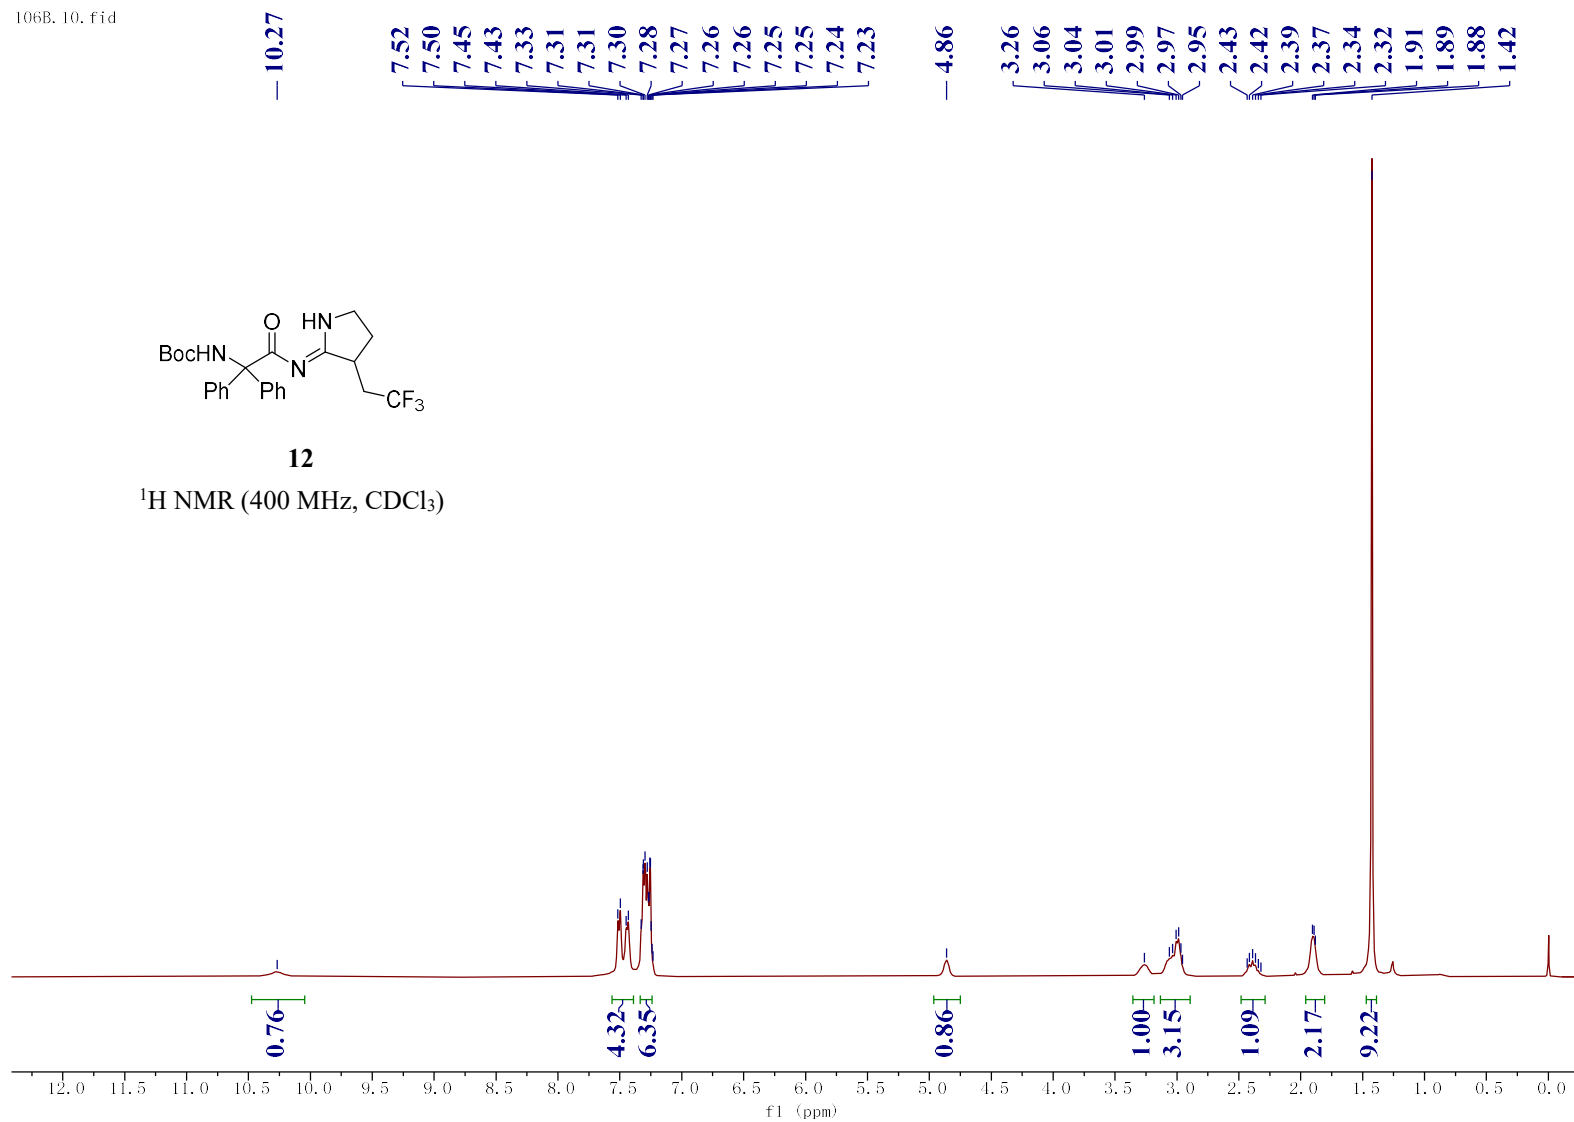

106B.13.fid

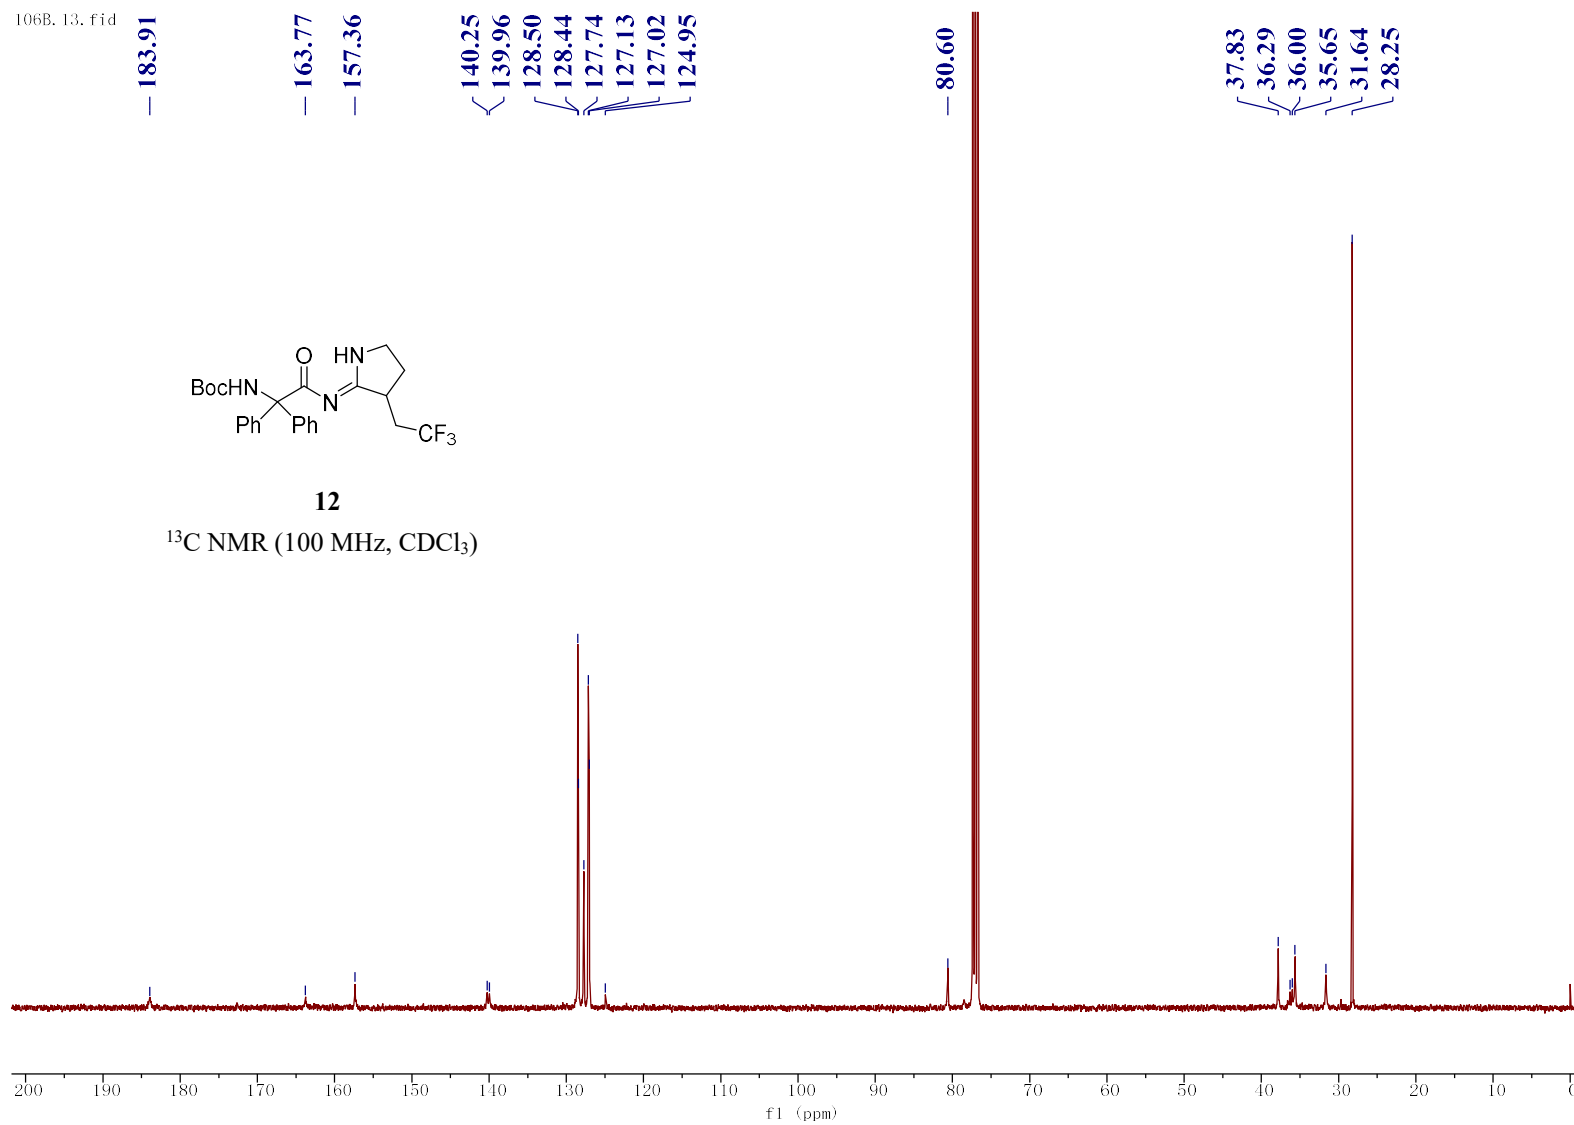

106B.11.fid

— -64.38

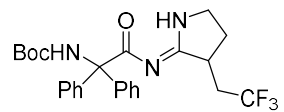

**12**

<sup>19</sup>F NMR (376 MHz, CDCl<sub>3</sub>)

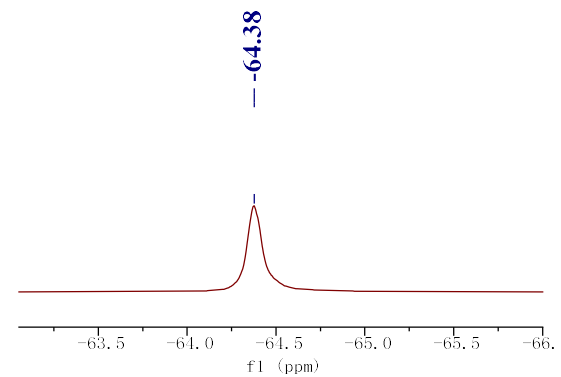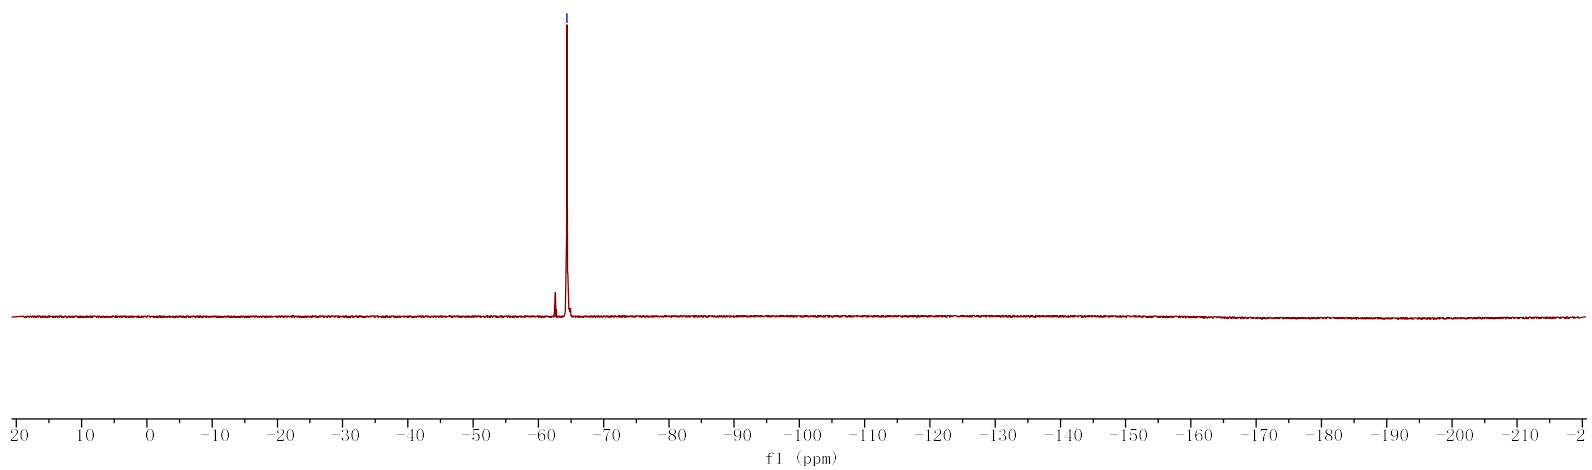

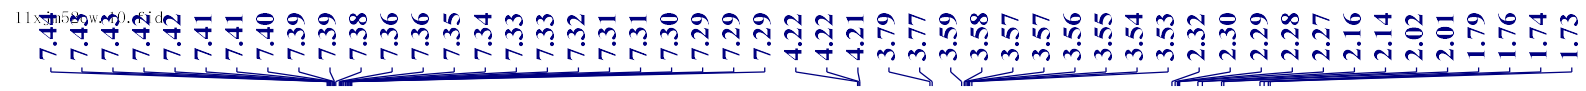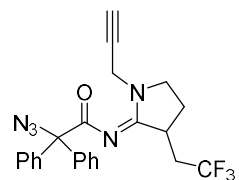

**13**

<sup>1</sup>H NMR (400 MHz, CDCl<sub>3</sub>)

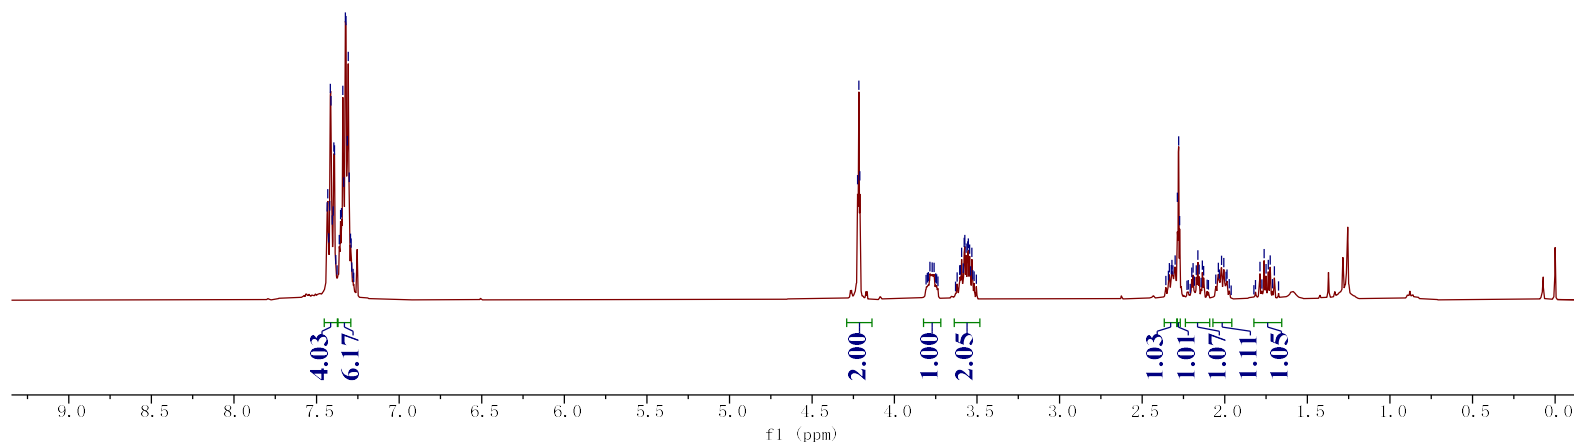

11xjm52ew.12.fid

— 179.65

— 171.13

140.59  
140.54  
130.35  
128.70  
128.61  
128.11  
127.99  
127.60  
124.84  
122.08

79.29  
76.25  
73.63

47.12  
36.52  
36.50  
36.47  
36.44  
34.82  
34.44  
34.16  
33.87  
33.58  
25.13

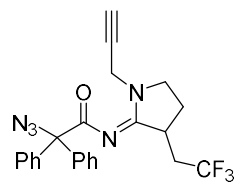

**13**

<sup>13</sup>C NMR (100 MHz, CDCl<sub>3</sub>)

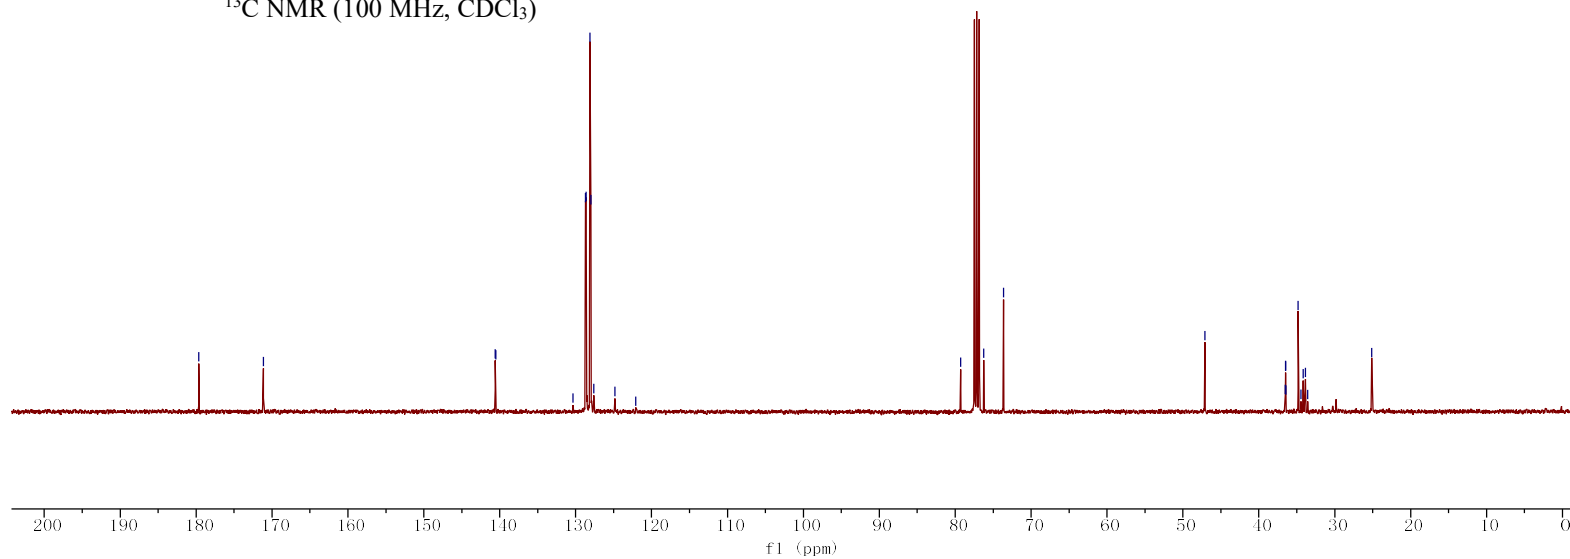

11xjm52ew.11.fid

-63.91  
-63.94  
-63.97

-63.91  
-63.94  
-63.97

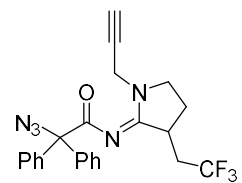

**13**

<sup>19</sup>F NMR (376 MHz, CDCl<sub>3</sub>)

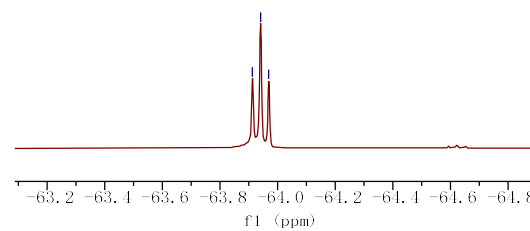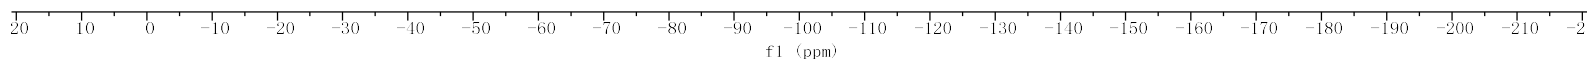

11xjm56bd2-CHF. 10. fid

7.55  
7.24  
7.24  
7.23  
7.22  
7.21  
7.19  
7.18  
7.18  
7.16

4.46  
4.42  
4.40  
4.35  
3.85  
3.82  
3.50  
3.48  
3.47  
3.45  
2.31  
2.22  
2.20  
2.19  
2.18  
2.16  
1.97  
1.95  
1.92  
1.91  
1.90  
1.87  
1.86  
1.85  
1.84

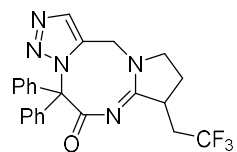

**14**

<sup>1</sup>H NMR (400 MHz, CDCl<sub>3</sub>)

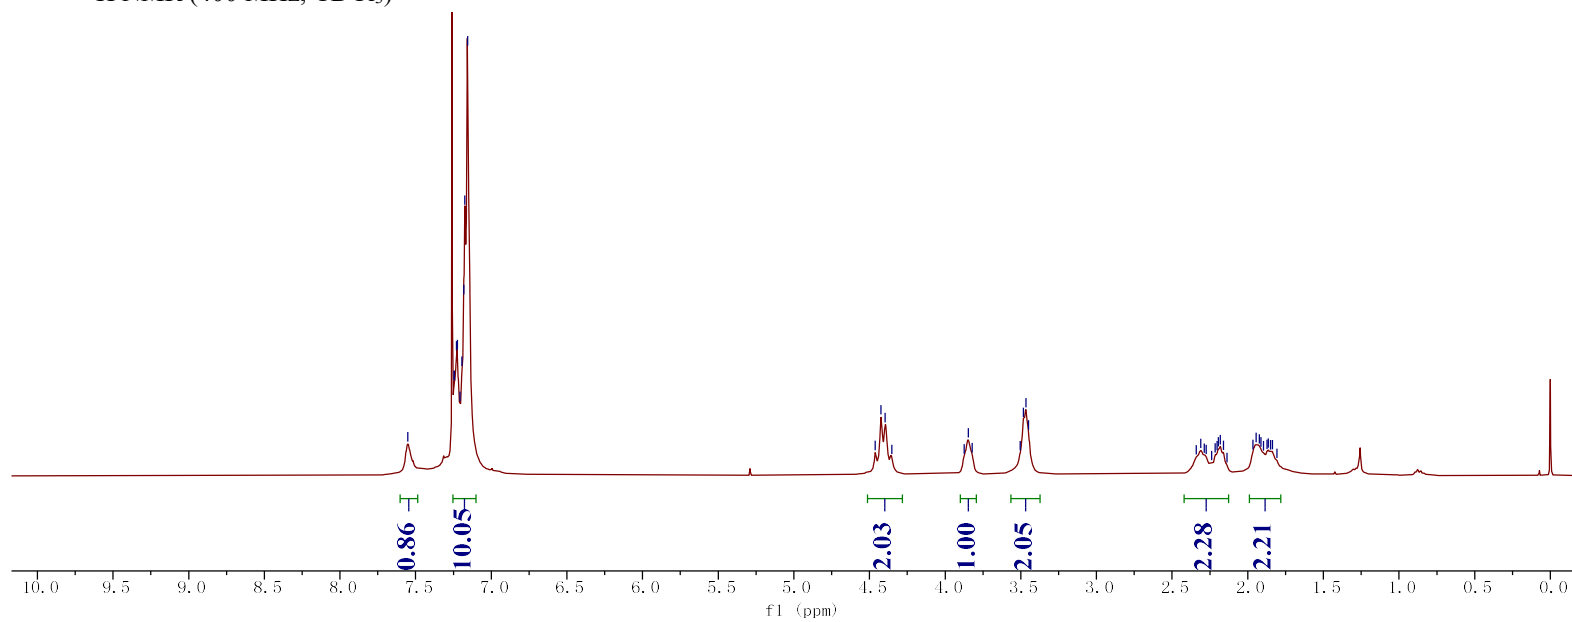

11xjm56bd2-CHF. 12. f1

— 177.16  
— 172.16

140.64  
139.96  
139.46  
130.56  
129.59  
129.54  
129.53  
129.45  
128.27  
128.18  
127.94  
127.80  
125.87  
125.04  
122.36

— 80.84

47.94  
40.49  
36.84  
34.27  
33.99  
33.71  
33.43  
— 24.86

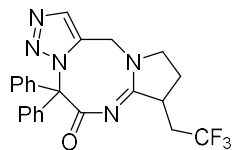

**14**

<sup>13</sup>C NMR (100 MHz, CDCl<sub>3</sub>)

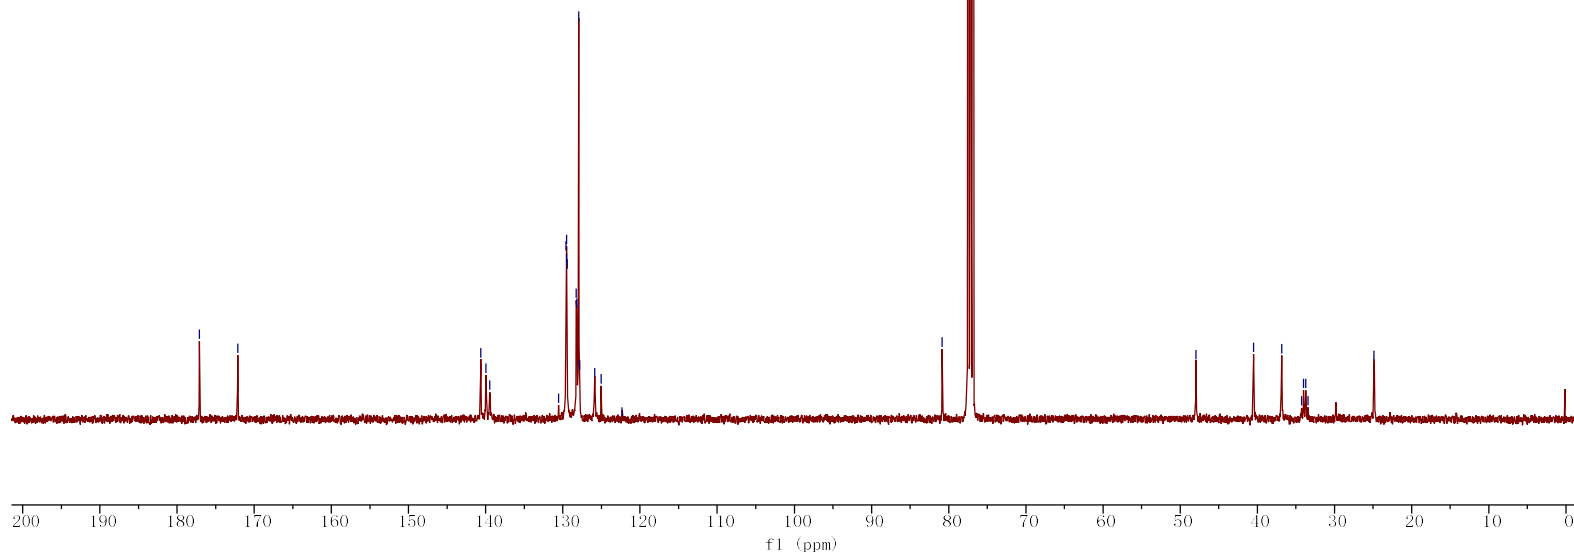



11xjm56bd2-CHF. 11. fid

-63.77  
-63.80

-63.77  
-63.80

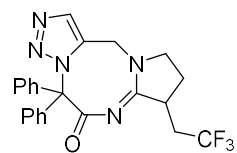

**14**

<sup>19</sup>F NMR (376 MHz, CDCl<sub>3</sub>)

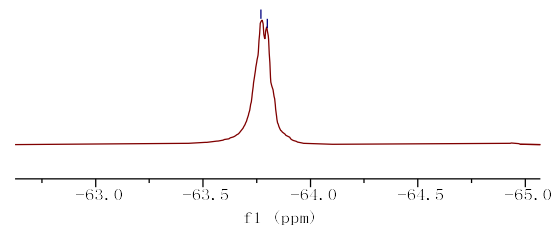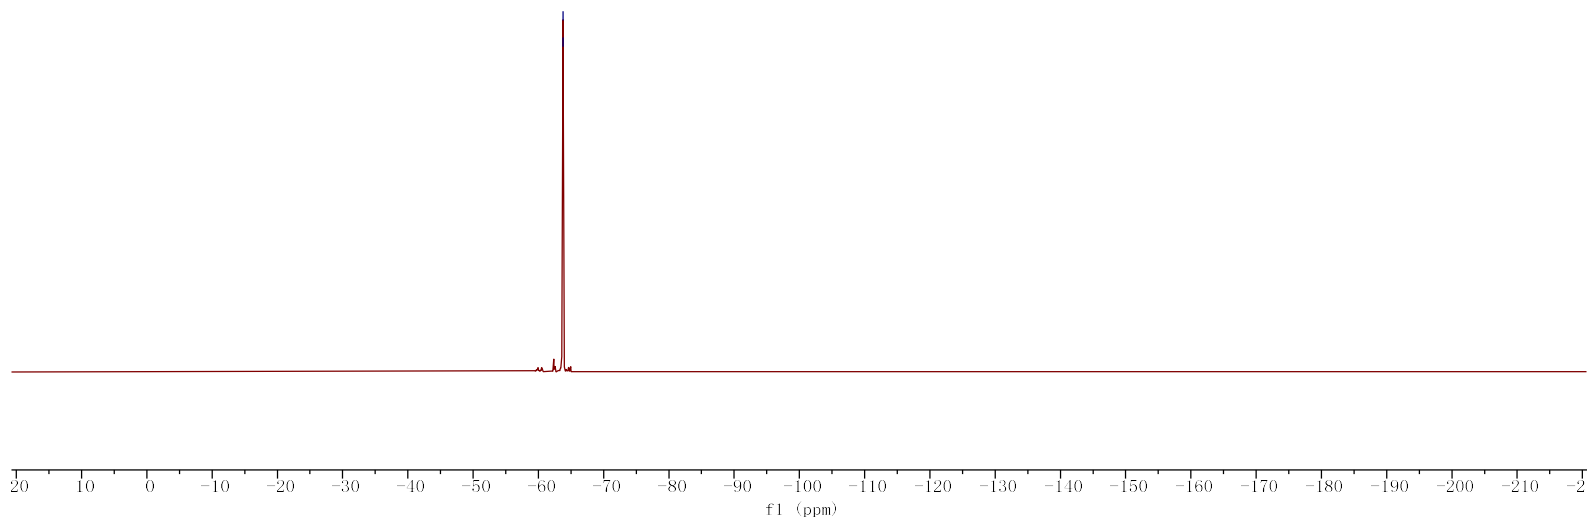

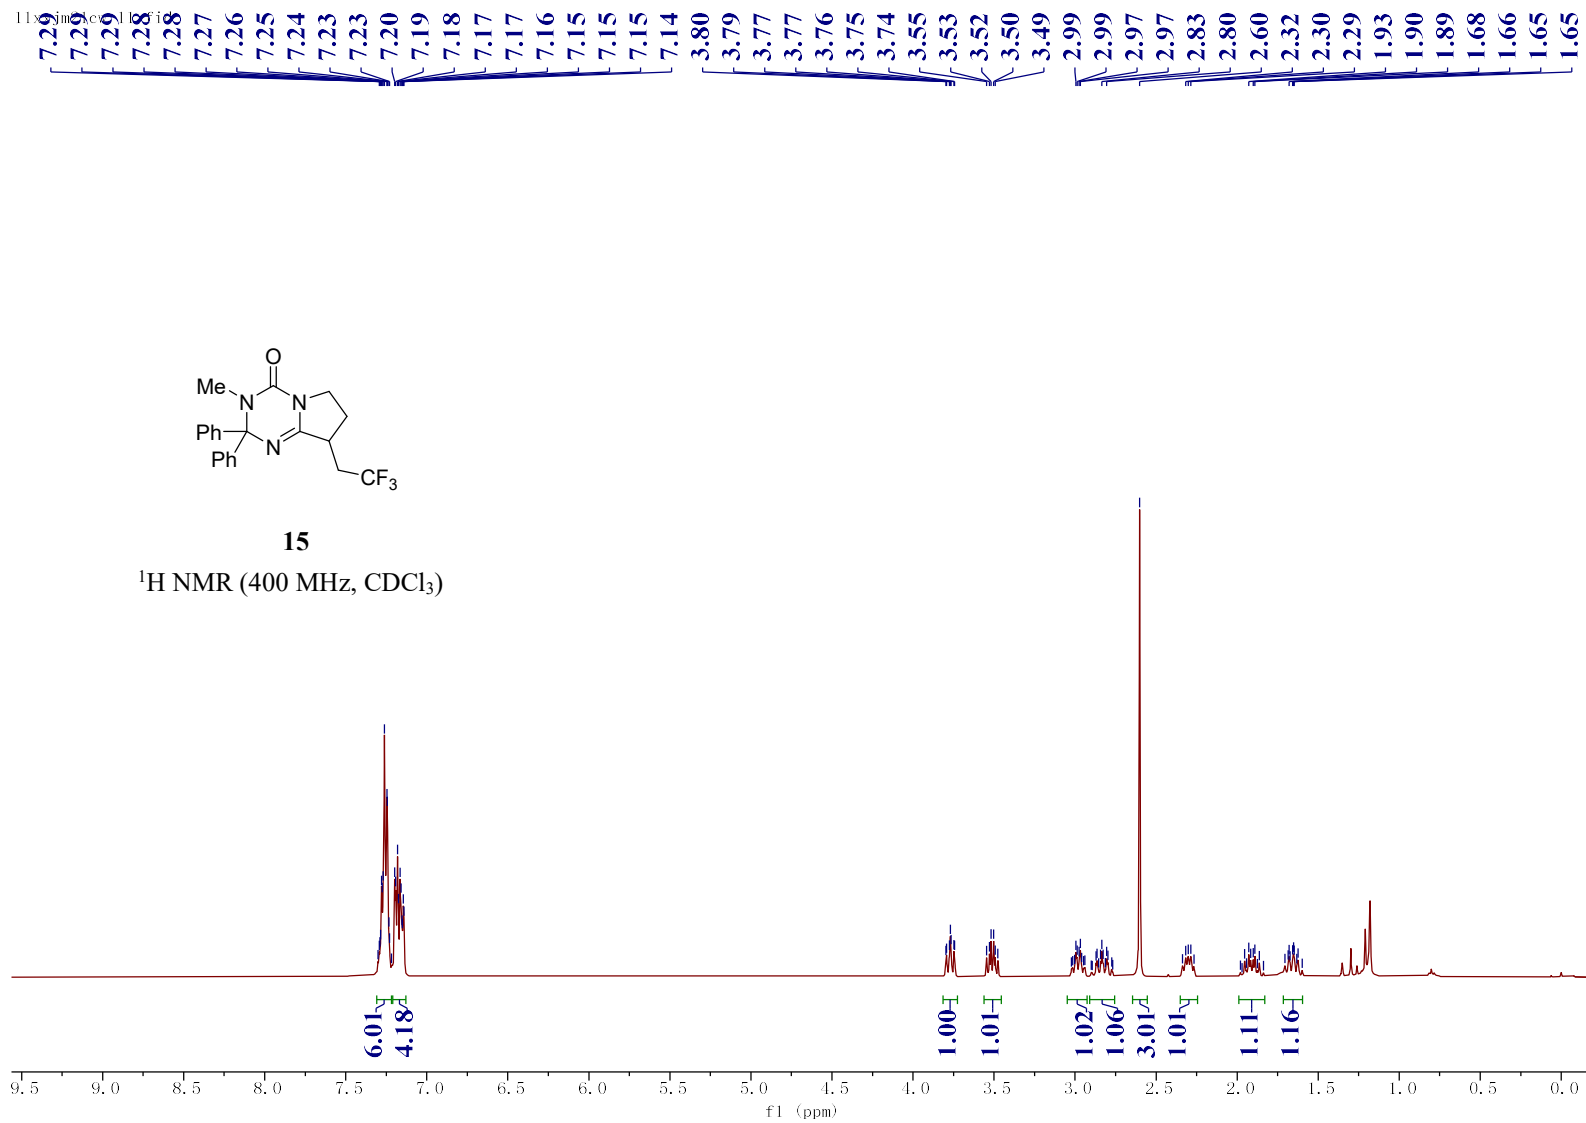

11xxjm21ew\_10.fid

— 157.45  
— 152.13  
— 143.03  
— 142.45  
— 130.85  
— 128.47  
— 128.23  
— 128.16  
— 128.10  
— 128.06  
— 127.62  
— 125.35  
— 122.60

— 84.12

— 44.20  
— 36.78  
— 36.75  
— 36.72  
— 36.69  
— 36.16  
— 35.87  
— 35.59  
— 35.30  
— 32.04  
— 27.31

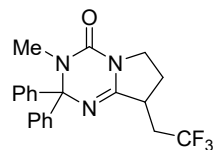

**15**

<sup>13</sup>C NMR (100 MHz, CDCl<sub>3</sub>)

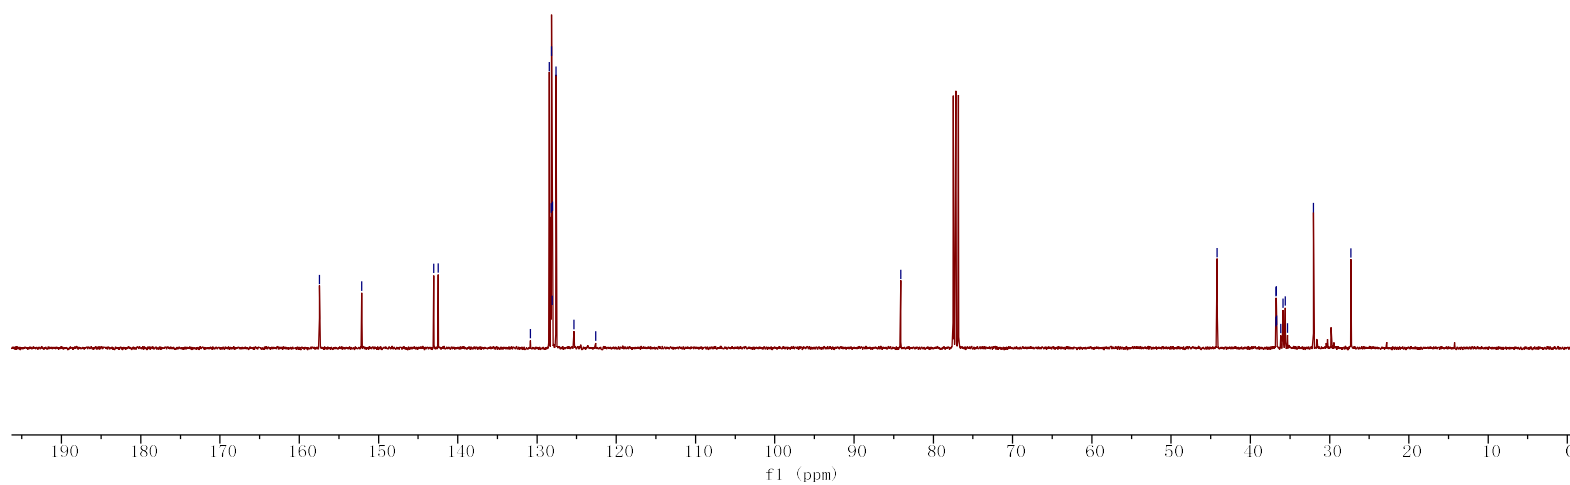

11xxjm21cw.12.fid

-64.68  
-64.71  
-64.74

-64.68  
-64.71  
-64.74

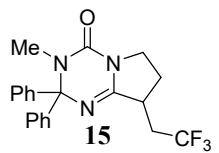

<sup>19</sup>F NMR (376 MHz, CDCl<sub>3</sub>)

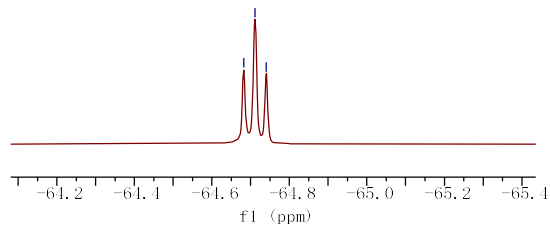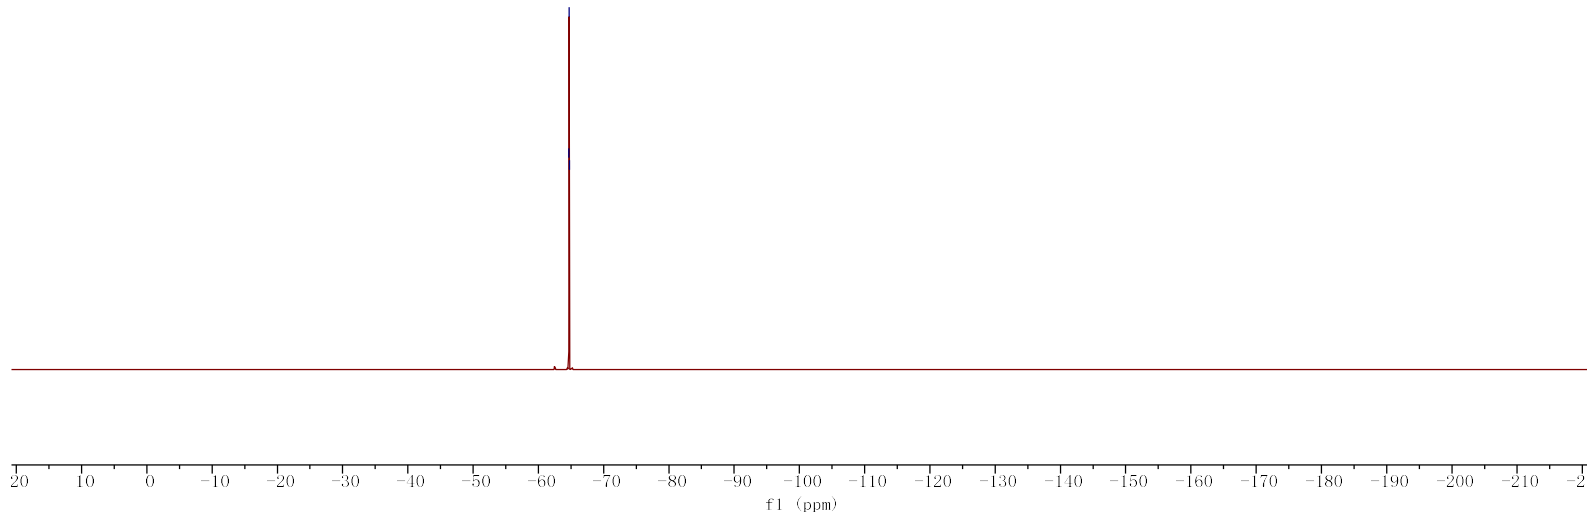

12.99%  
 9.69  
 7.73  
 7.71  
 7.69  
 7.67  
 7.49  
 7.39  
 7.38  
 7.37  
 7.37  
 7.36  
 7.35  
 7.35  
 7.33  
 7.33  
 7.31  
 7.29  
 7.28  
 7.28  
 7.27  
 7.26  
 7.24  
 7.22  
 7.22  
 7.21  
 7.20  
 7.17  
 4.26  
 4.23  
 4.18  
 4.14  
 3.39  
 3.38  
 3.37  
 3.36  
 3.00  
 2.98  
 2.97  
 2.97  
 2.19  
 2.18  
 2.17  
 2.17  
 2.16  
 2.15  
 1.80  
 1.79  
 1.78  
 1.77  
 1.13

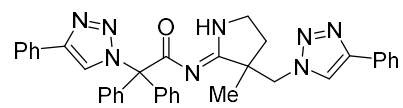

**16**

<sup>1</sup>H NMR (400 MHz, CDCl<sub>3</sub>)

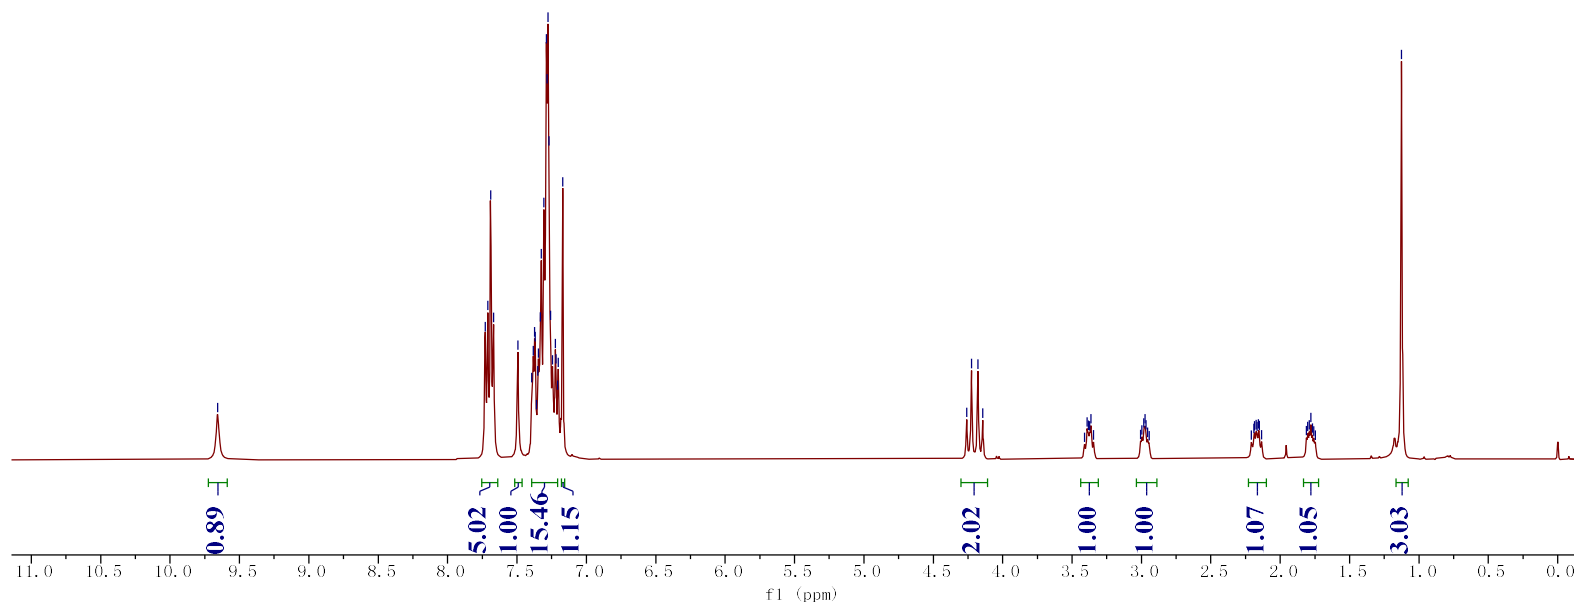

12xjm97cw.11.f3

— 182.86  
— 176.73

✓ 147.92  
— 145.89  
✓ 140.17  
✓ 139.99  
✓ 130.91  
✓ 130.45  
✓ 129.94  
✓ 129.71  
✓ 128.88  
✓ 128.84  
✓ 128.74  
✓ 128.40  
✓ 128.23  
✓ 128.15  
✓ 128.04  
✓ 128.01  
✓ 125.92  
✓ 125.70  
✓ 122.70  
✓ 121.47  
✓ 80.31

✓ 55.63  
✓ 49.52  
✓ 44.13

— 29.16  
— 22.79

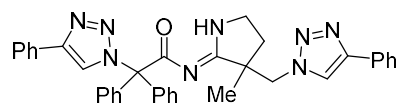

**16**

<sup>13</sup>C NMR (100 MHz, CDCl<sub>3</sub>)

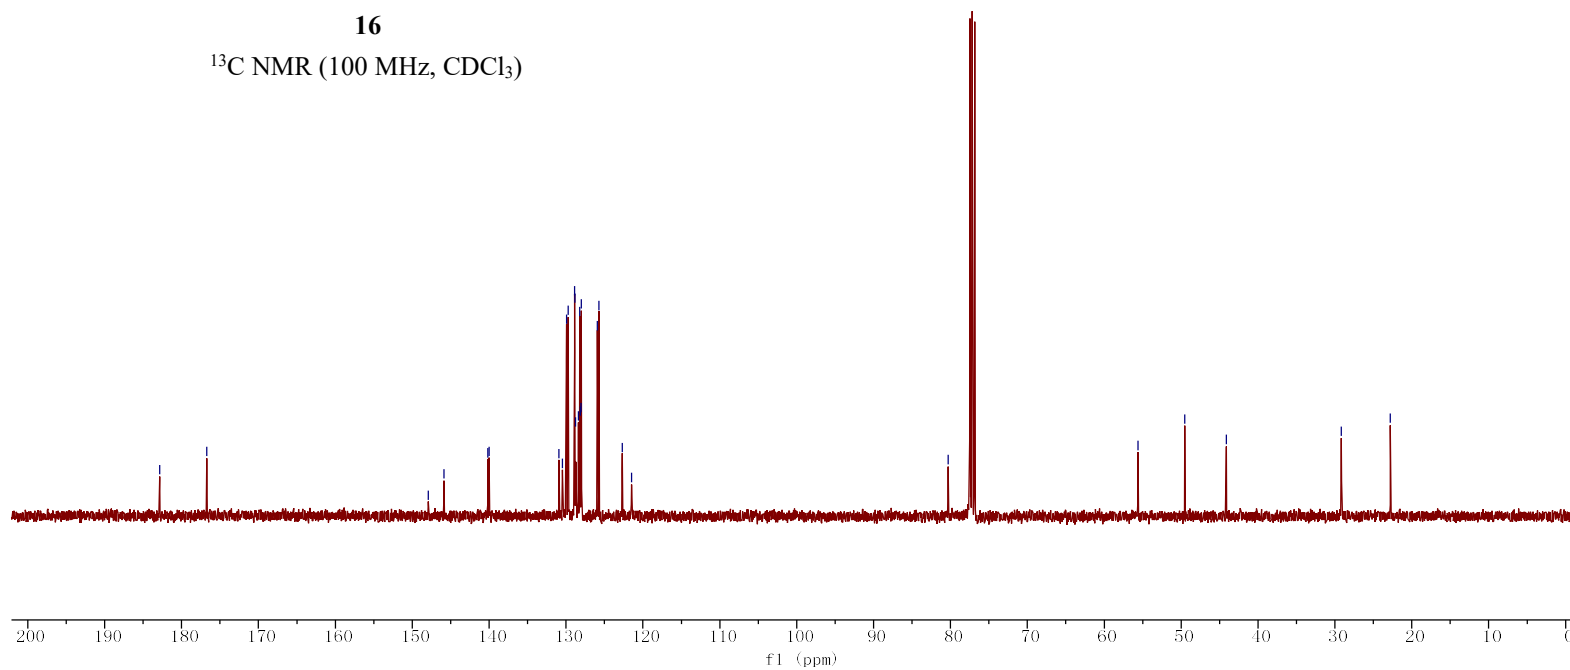

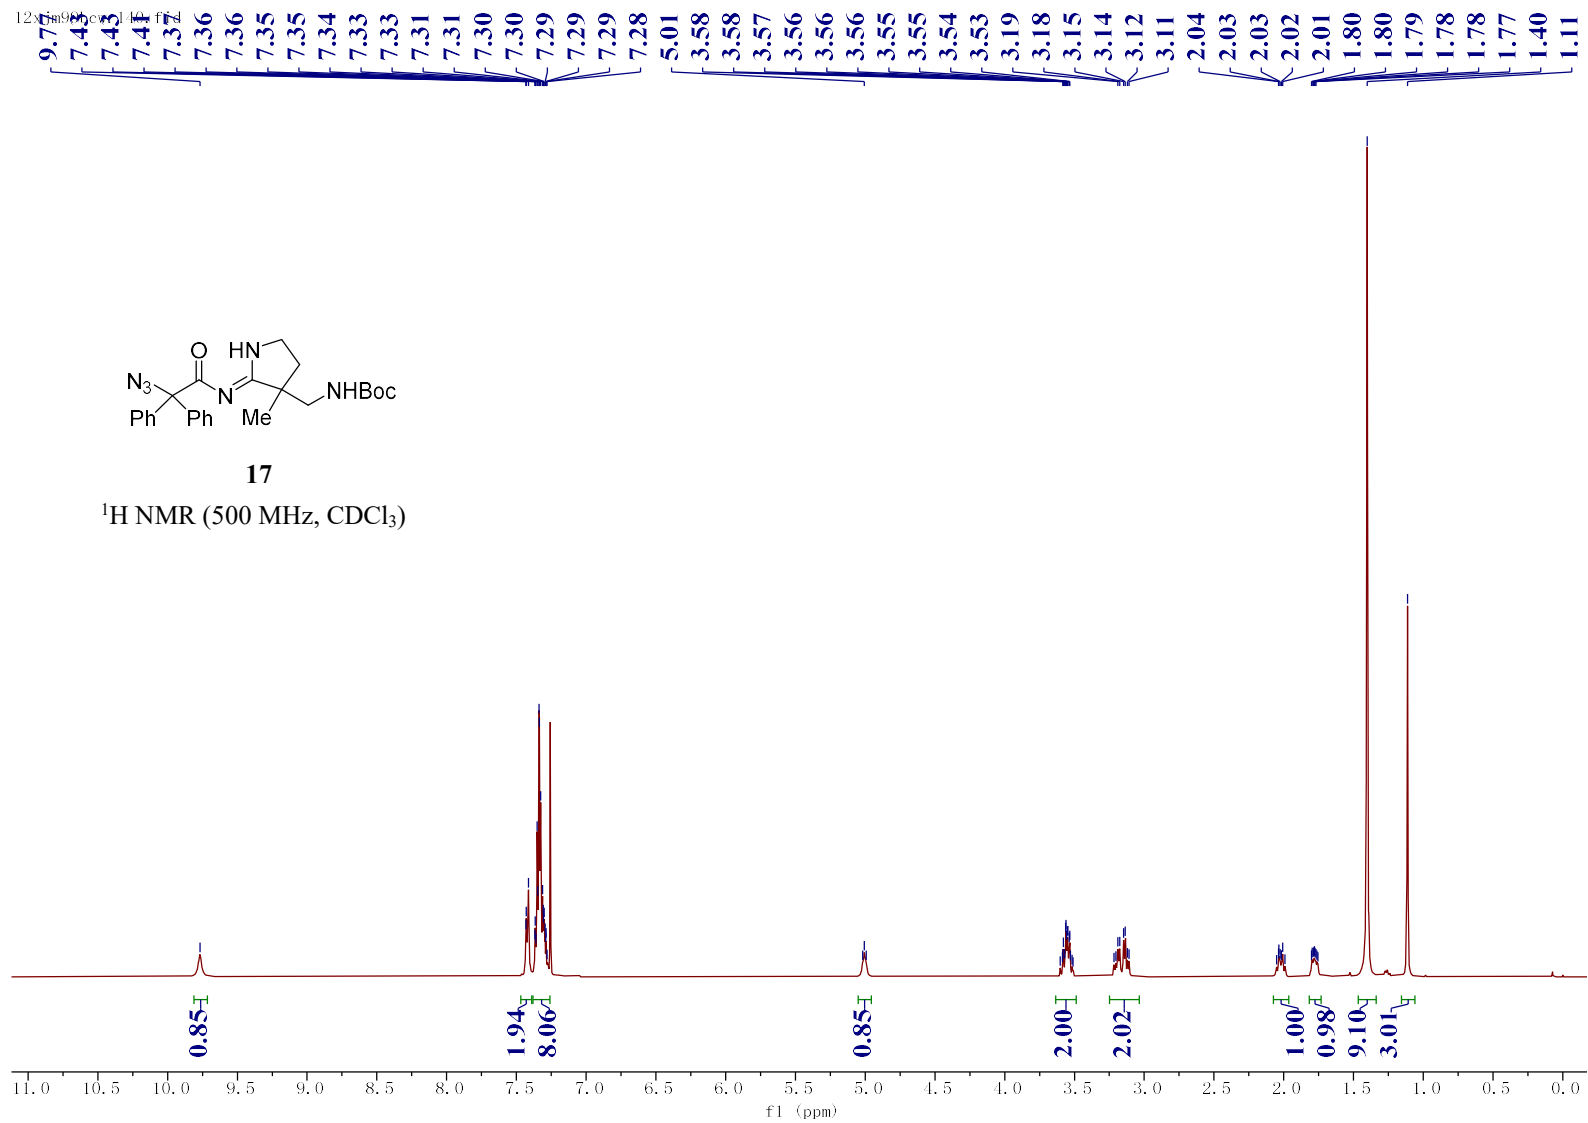

12x jm99bew-c. 1417.fid

— 184.77  
— 178.78

— 156.57

— 141.02  
— 140.48  
— 128.58  
— 128.46  
— 128.12  
— 128.08  
— 127.98  
— 127.91

— 79.18

— 48.25  
— 46.52  
— 44.19

— 30.69  
— 28.45  
— 21.15

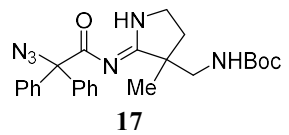

$^{13}\text{C}$  NMR (125 MHz,  $\text{CDCl}_3$ )

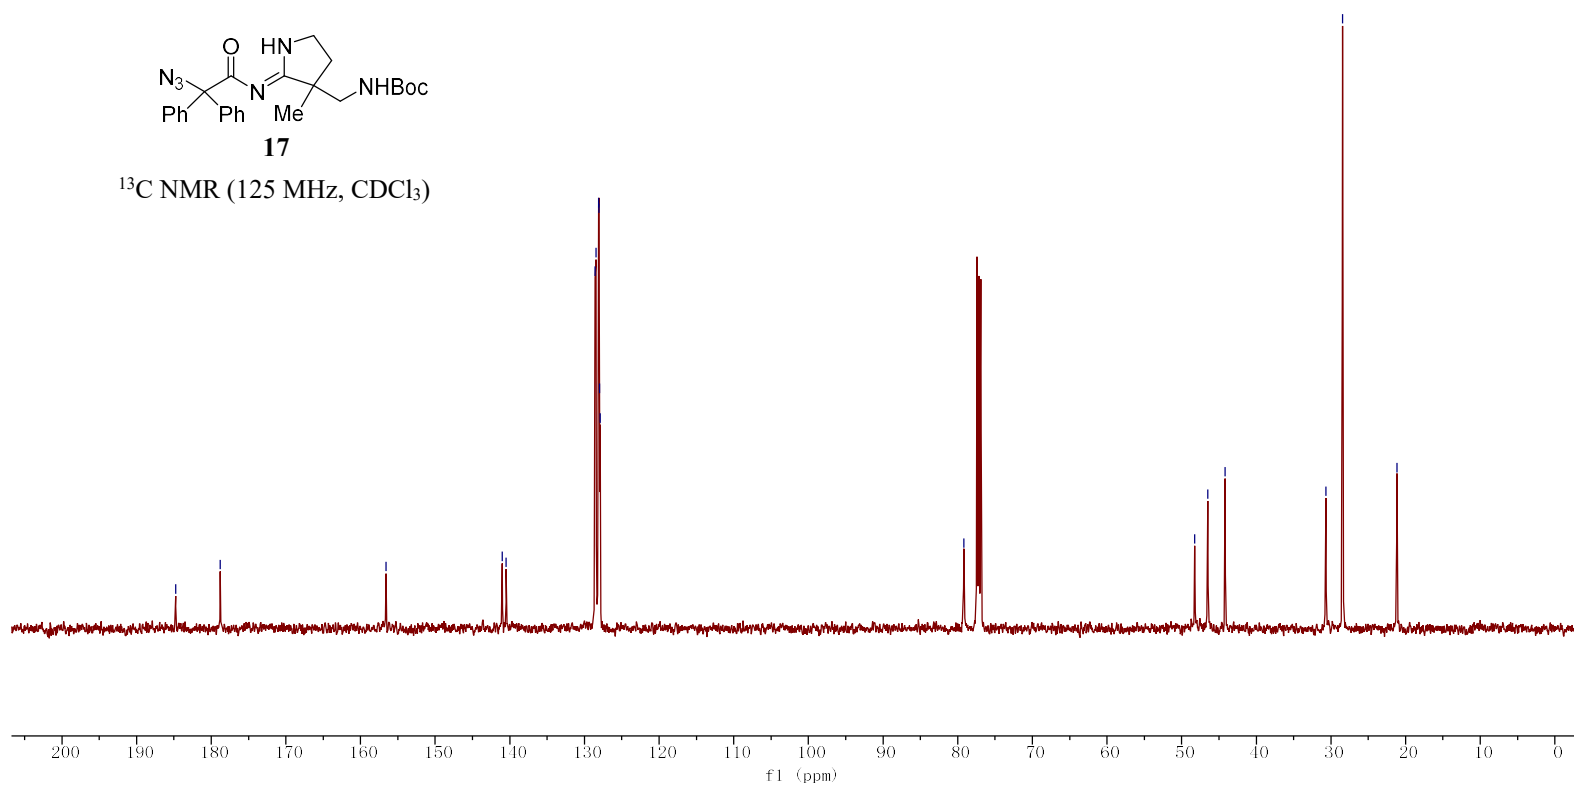



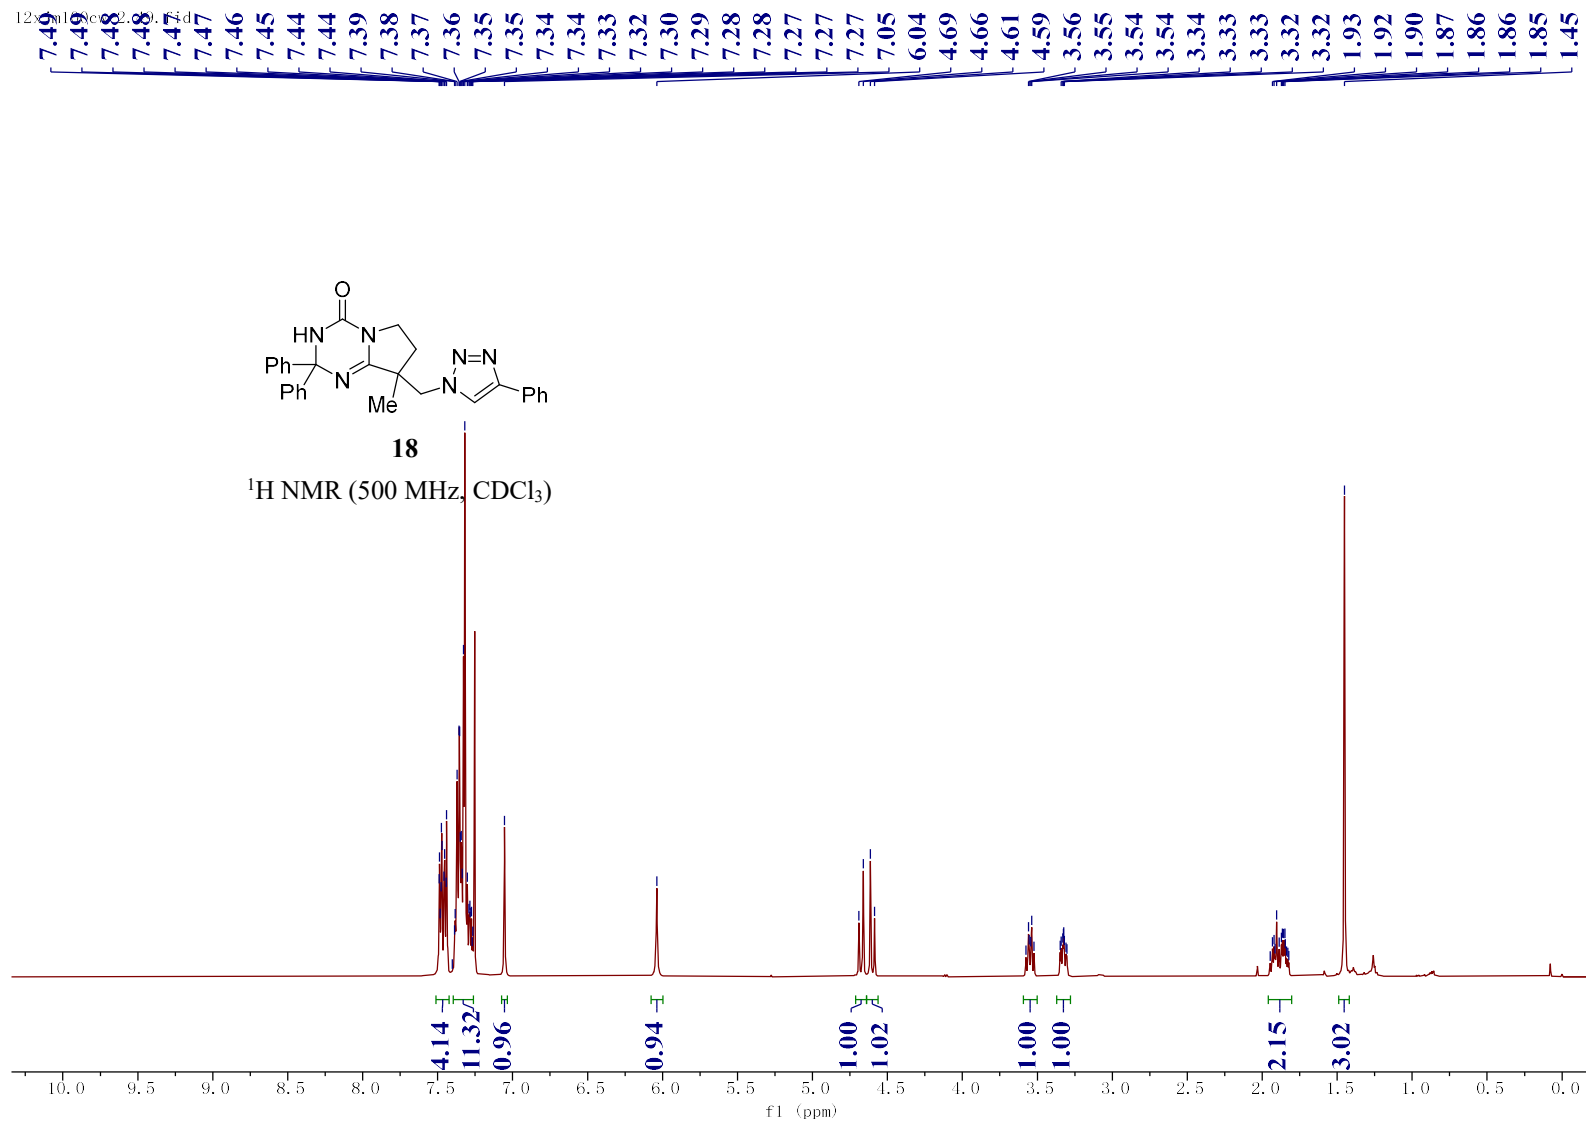

12xjm100cw\_24.fid

159.79  
150.61  
148.03  
145.93  
145.11  
130.20  
128.77  
128.64  
128.56  
128.23  
128.20  
128.05  
126.27  
126.24  
126.03  
120.35  
79.70  
55.77  
46.90  
41.62  
29.67  
23.48

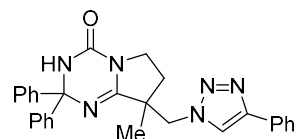

**18**

<sup>13</sup>C NMR (125 MHz, CDCl<sub>3</sub>)

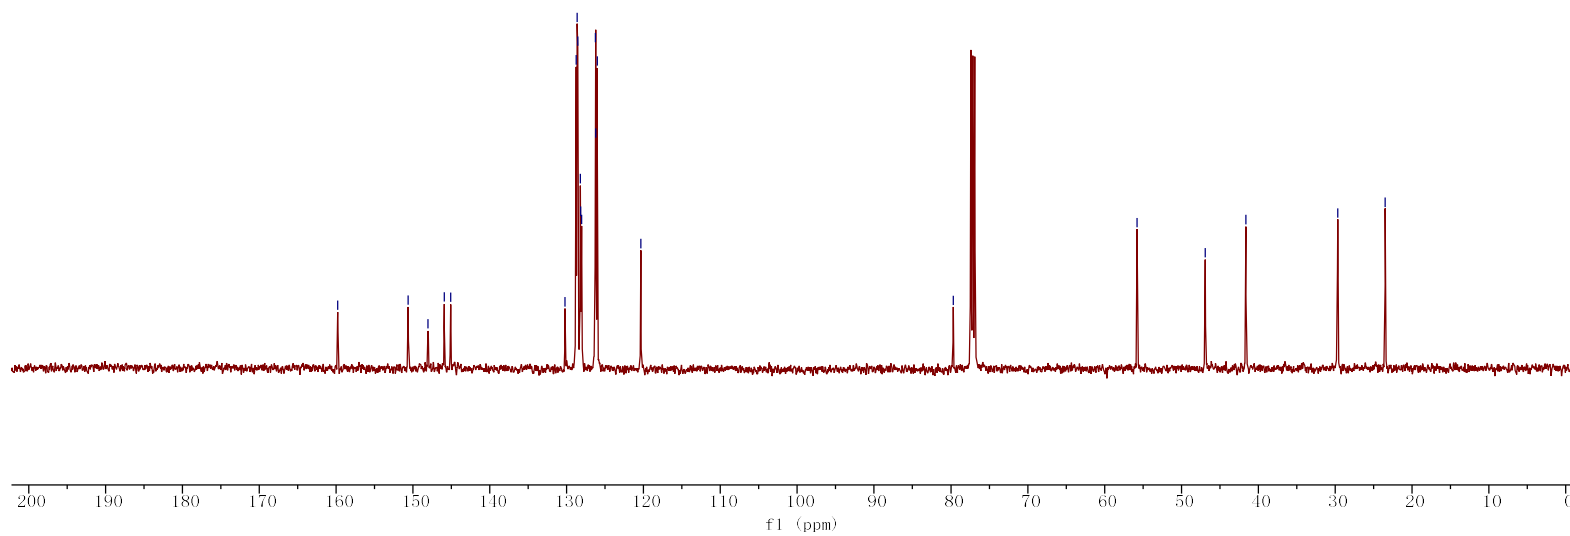

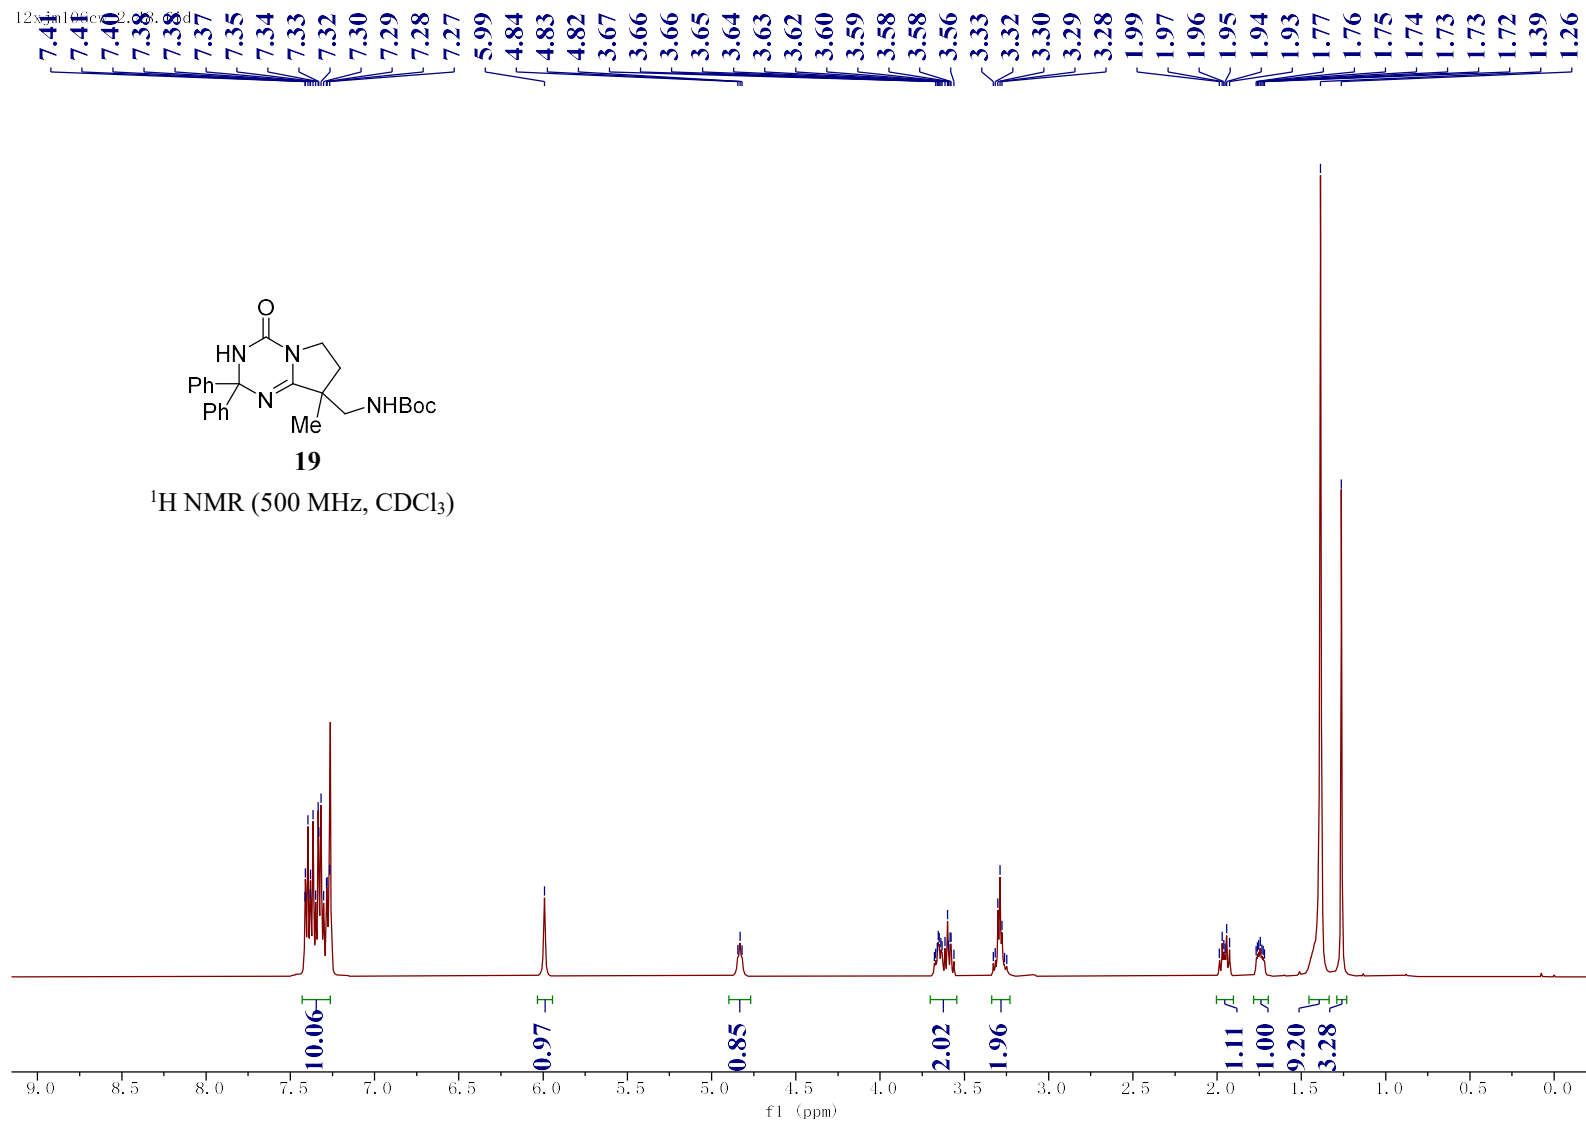

12xjm106cw-2.47.fid

161.62  
156.39  
151.25  
145.33  
128.53  
128.41  
127.90  
127.88  
126.45  
125.92  
79.27  
79.03  
46.89  
45.95  
41.93  
30.65  
28.43  
21.87

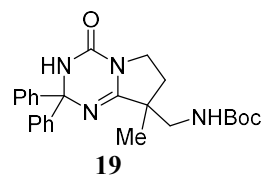

<sup>13</sup>C NMR (125 MHz, CDCl<sub>3</sub>)

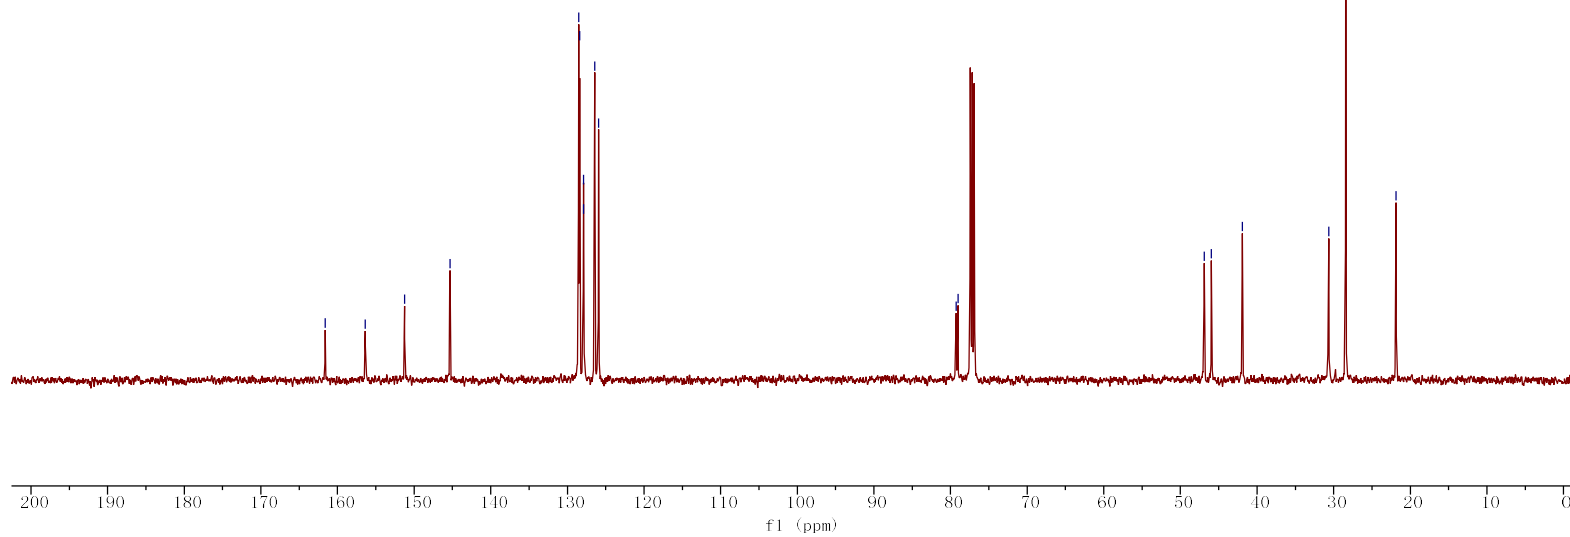

Supplement: d4qo00934g1.pdf [file d4qo00934g1.pdf]
